# Supplementary material for: An iron(iii)-catalyzed dehydrogenative cross-coupling reaction of indoles with benzylamines to prepare 3-aminoindole derivatives
Source: Royal Society of Chemistry journal article supplement (doi:10.1039/d1gc02849a), 2021-01-01

## Supporting Information

### **Iron(III)-Catalyzed Dehydrogenative Cross-Coupling Reaction of Indoles with Benzylamines to Prepare 3-Aminoindole Derivatives**

Wei-Li Chen,<sup>†</sup> Kun Li,<sup>†</sup> Wei-Cong Liao, Wang-Fu Liang, Pei-Wen Qiu, Cui Liang, Gui-Fa Su,\* and Dong-Liang Mo\*

*State Key Laboratory for Chemistry and Molecular Engineering of Medicinal Resources, Collaborative Innovation Center for Guangxi Ethnic Medicine, School of Chemistry and Pharmaceutical Sciences, Guangxi Normal University, 15 Yu Cai Road, Guilin, 541004, China. E-mail: gfysslx@163.com; moeastlight@mailbox.gxnu.edu.cn*

### **Contents**

|     |                                                                                              |     |
|-----|----------------------------------------------------------------------------------------------|-----|
| 1.  | General experimental information                                                             | S2  |
| 2.  | General procedure for the synthesis of compounds <b>3</b> and <b>4</b>                       | S2  |
| 3.  | Synthesis of compound <b>5a</b> , <b>6</b> , <b>7</b> and <b>8</b>                           | S26 |
| 4.  | Gram scale preparation of <b>3aa</b>                                                         | S29 |
| 5.  | General procedure for synthesis of 2-arylindoles <b>1</b>                                    | S29 |
| 6.  | Description of Hammett study experiments                                                     | S30 |
| 7.  | Comparison of green metrics                                                                  | S32 |
| 8.  | References                                                                                   | S33 |
| 9.  | X-ray structures for compounds <b>3ra</b> and <b>4at</b>                                     | S34 |
| 10. | NMR spectra for compounds <b>3</b> , <b>4</b> , <b>5a</b> , <b>6</b> , <b>7</b> and <b>8</b> | S34 |

## 1. General experimental information

$^1\text{H}$  NMR and  $^{13}\text{C}$  NMR spectra were recorded at ambient temperature using 400 MHz or 600 MHz spectrometers. The data are reported as follows: chemical shift in ppm from internal tetramethylsilane on the  $\delta$  scale, multiplicity (br = broad, s = singlet, d = doublet, t = triplet, q = quartet, m = multiplet), coupling constants (Hz), and integration. High resolution mass spectra were acquired on an LTQ FT spectrometer, and were obtained by peak matching. Melting points are reported uncorrected. Analytical thin layer chromatography was performed on 0.25 mm extra hard silica gel plates with UV254 fluorescent indicator. Chromatography was performed using with 300-400 mesh silica gel ( $\text{SiO}_2$ ). Unless otherwise noted, all reactions were performed under air atmosphere. All reagents and solvents were obtained from commercial sources and where appropriate, purified prior to use. Benzylamines **2a-2v** was purchased from Sigma-Aldrich.

## 2. General procedure for the synthesis of compounds **3** and **4**

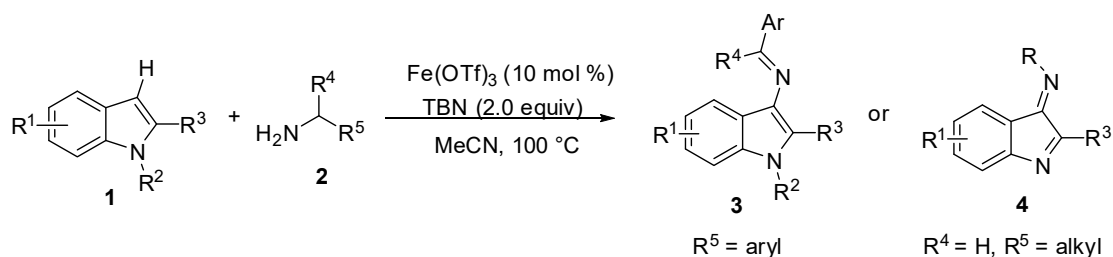

**General procedure A:** In a dry Teflon-sealed reaction flask equipped with a magnetic stir bar was charged with the corresponding indoles **1** (0.3 mmol), amine **2** (0.6 mmol, 2.0 equiv.),  $\text{Fe}(\text{OTf})_3$  (0.015 g, 10 mol%), and TBN (0.062 g, 0.6 mmol, 2.0 equiv.). Then, MeCN (3.0 mL) was added. The mixture was stirred at 100 °C for 10-18 h (monitored by TLC). At this time, the solvent was removed under reduced pressure and the crude product was purified by flash column chromatography (the crude residue was dry loaded with silica gel, 1/10, ethyl acetate/petroleum ether) to afford 3-aminoindoles **3** or indolenine imine **4**.

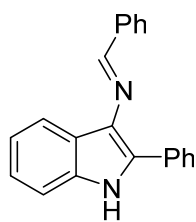

**3aa**

**(E)-N-Benzylidene-2-phenyl-1H-indol-3-amine (3aa)**, a yellow solid, 0.075 g, 85% yield. Mp: 102–103 °C; <sup>1</sup>H NMR (400 MHz, CDCl<sub>3</sub>): δ 9.07 (s, 1H), 8.18 (brs, 1H), 7.91 (d, *J* = 2.0 Hz, 3H), 7.86 (d, *J* = 6.8 Hz, 2H), 7.41 (d, *J* = 7.6 Hz, 5H), 7.31 (t, *J* = 7.6 Hz, 2H), 7.20–7.18 (m, 2H); <sup>13</sup>C NMR (100 MHz, CDCl<sub>3</sub>): δ 156.6, 137.7, 135.4, 131.9, 131.6, 130.1, 128.6, 128.5, 127.9, 127.8, 127.5, 125.8, 123.0, 121.9, 120.9, 119.7, 111.5; IR (thin film) 3573, 3394, 3056, 1641, 1597, 1573, 1535, 938, 742 cm<sup>-1</sup>; HRMS (ESI) *m/z* calcd for C<sub>21</sub>H<sub>17</sub>N<sub>2</sub> [M+H]<sup>+</sup>: 297.1386, found: 297.1376.

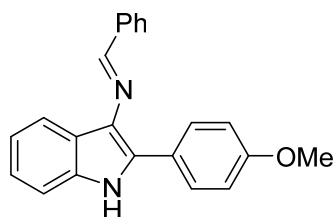

**3ba**

**(E)-N-Benzylidene-2-(4-methoxyphenyl)-1H-indol-3-amine (3ba)**, a yellow solid, 0.067 g, 68% yield. Mp: 155–156 °C; <sup>1</sup>H NMR (400 MHz, CDCl<sub>3</sub>): δ 9.11 (s, 1H), 8.18 (brs, 1H), 7.93 (d, *J* = 6.8 Hz, 3H), 7.86 (d, *J* = 8.4 Hz, 2H), 7.47–7.41 (m, 3H), 7.35 (d, *J* = 7.2 Hz, 1H), 7.23–7.16 (m, 2H), 7.00 (d, *J* = 7.6 Hz, 2H), 3.83 (s, 3H); <sup>13</sup>C NMR (100 MHz, CDCl<sub>3</sub>): δ 159.2, 155.6, 137.9, 135.3, 132.4, 130.0, 129.3, 128.6, 127.8, 124.8, 124.4, 122.6, 122.1, 120.8, 119.6, 114.1, 111.3, 55.3; IR (thin film) 3573, 3475, 2959, 2924, 1604, 1536, 1307, 740 cm<sup>-1</sup>; HRMS (ESI) *m/z* calcd for C<sub>22</sub>H<sub>19</sub>N<sub>2</sub>O [M+H]<sup>+</sup>: 327.1492, found: 327.1482.

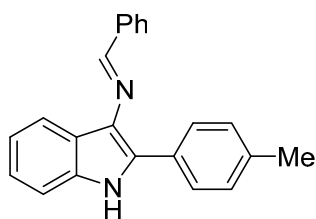

**3ca**

**(E)-N-benzylidene-2-(p-tolyl)-1H-indol-3-amine (3ca)**, a yellow oil, 0.086 g, 93% yield;  $^1\text{H}$  NMR (400 MHz,  $\text{CDCl}_3$ ):  $\delta$  9.07 (s, 1H), 8.14 (brs, 1H), 7.91 (d,  $J = 6.8$  Hz, 3H), 7.76 (d,  $J = 8.4$  Hz, 2H), 7.44–7.39 (m, 3H), 7.28 (d,  $J = 6.8$  Hz, 1H), 7.22–7.16 (m, 4H), 6.99 (d,  $J = 8.4$  Hz, 2H), 2.35 (s, 3H);  $^{13}\text{C}$  NMR (100 MHz,  $\text{CDCl}_3$ ):  $\delta$  156.0, 137.9, 137.5, 135.4, 132.4, 130.0, 129.3, 128.8, 128.6, 127.9, 127.8, 125.4, 122.8, 122.0, 120.8, 119.7, 114.3, 21.2; IR (thin film) 3433, 3144, 2964, 1605, 1600, 1438, 1354, 737  $\text{cm}^{-1}$ ; HRMS (ESI)  $m/z$  calcd for  $\text{C}_{22}\text{H}_{19}\text{N}_2$   $[\text{M}+\text{H}]^+$ : 311.1543, found: 311.1541.

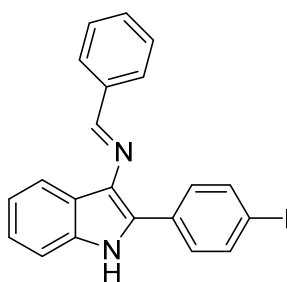

**3da**

**(E)-N-(2-(4-iodophenyl)-1H-indol-3-yl)-1-phenylmethanimine (3da)**, a yellow solid, 0.078 g, 62% yield. Mp: 167–168  $^{\circ}\text{C}$ ;  $^1\text{H}$  NMR (400 MHz,  $\text{CDCl}_3$ ):  $\delta$  9.12 (s, 1H), 8.23 (s, 1H), 7.94 (d,  $J = 7.6$  Hz, 3H), 7.81 (d,  $J = 8.4$  Hz, 2H), 7.70 (d,  $J = 8.4$  Hz, 2H), 7.50–7.44 (m, 3H), 7.41 (d,  $J = 7.6$  Hz, 2H), 7.28 (t,  $J = 7.6$  Hz, 2H), 7.22 (d,  $J = 7.8$  Hz, 2H);  $^{13}\text{C}$  NMR (100 MHz,  $\text{CDCl}_3$ ):  $\delta$  156.9, 137.7, 137.6, 135.6, 131.2, 130.7, 130.4, 129.5, 128.7, 128.0, 126.5, 123.5, 121.9, 121.2, 119.9, 111.6, 93.3; IR (thin film) 3440, 3049, 1599, 1570, 1478, 1430, 817, 738  $\text{cm}^{-1}$ ; HRMS (ESI)  $m/z$  calcd for  $\text{C}_{21}\text{H}_{15}\text{IN}_2$   $[\text{M}+\text{H}]^+$ : 423.0353, found: 423.0352.

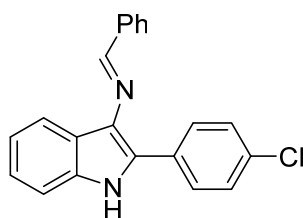

**3ea**

**(E)-N-Benzylidene-2-(4-chlorophenyl)-1H-indol-3-amine (3ea)**, a yellow oil, 0.087 g, 88% yield;  $^1\text{H}$  NMR (400 MHz,  $\text{CDCl}_3$ ):  $\delta$  9.04 (s, 1H), 8.15 (brs, 1H), 7.89–7.86 (m, 3H), 7.76 (d,  $J = 8.0$  Hz, 2H), 7.45 (d,  $J = 6.8$  Hz, 3H), 7.35 (d,  $J = 8.4$  Hz, 2H),

7.27 (d,  $J = 7.6$  Hz, 1H), 7.22–7.15 (m, 2H);  $^{13}\text{C}$  NMR (100 MHz,  $\text{CDCl}_3$ ):  $\delta$  156.8, 137.6, 135.5, 133.4, 130.8, 130.3, 130.1, 129.0, 128.8, 128.6, 127.9, 126.1, 123.3, 121.8, 121.1, 119.8, 111.6; IR (thin film) 3574, 3412, 3053, 1651, 1610, 1569, 1529, 830, 738  $\text{cm}^{-1}$ ; HRMS (ESI)  $m/z$  calcd for  $\text{C}_{21}\text{H}_{16}\text{ClN}_2$   $[\text{M}+\text{H}]^+$ : 331.0997, found: 331.0994.

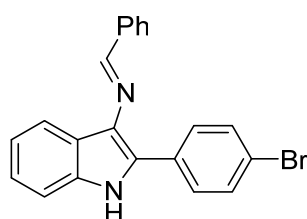

**3fa**

**(E)-N-Benzylidene-2-(4-bromophenyl)-1H-indol-3-amine (3fa)**, a yellow solid, 0.100 g, 89% yield. Mp: 153–154 °C;  $^1\text{H}$  NMR (400 MHz,  $\text{CDCl}_3$ ):  $\delta$  9.06 (s, 1H), 8.18 (brs, 1H), 7.90–7.88 (m, 3H), 7.73 (d,  $J = 8.4$  Hz, 2H), 7.53 (d,  $J = 8.8$  Hz, 2H), 7.48–7.43 (m, 3H), 7.32 (d,  $J = 7.6$  Hz, 1H), 7.24–7.16 (m, 2H);  $^{13}\text{C}$  NMR (100 MHz,  $\text{CDCl}_3$ ):  $\delta$  156.9, 137.6, 135.5, 131.6, 130.7, 130.6, 130.4, 129.3, 128.7, 128.0, 126.3, 123.3, 121.8, 121.7, 121.1, 119.8, 111.6; IR (thin film) 3573, 3438, 3010, 1651, 1572, 1526, 1006, 737  $\text{cm}^{-1}$ ; HRMS (ESI)  $m/z$  calcd for  $\text{C}_{21}\text{H}_{16}\text{BrN}_2$   $[\text{M}+\text{H}]^+$ : 375.0491, found: 375.0519.

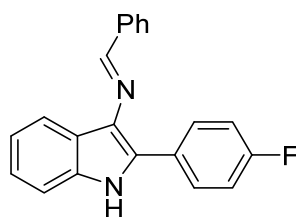

**3ga**

**(E)-N-Benzylidene-2-(4-fluorophenyl)-1H-indol-3-amine (3ga)**, a yellow solid, 0.076 g, 81% yield. Mp: 141–142 °C;  $^1\text{H}$  NMR (400 MHz,  $\text{CDCl}_3$ ):  $\delta$  9.13 (s, 1H), 8.18 (brs, 1H), 7.95–7.88 (m, 5H), 7.49–7.44 (m, 3H), 7.39 (d,  $J = 8.0$  Hz, 1H), 7.27–7.20 (m, 2H), 7.18 (t,  $J = 8.8$  Hz, 2H);  $^{13}\text{C}$  NMR (100 MHz,  $\text{CDCl}_3$ ):  $\delta$  163.6 (d,  $J = 247.2$  Hz), 156.5, 137.7, 135.4, 131.3, 130.3, 129.7, 129.6, 128.7, 127.9, 125.7, 123.1, 121.9, 121.1, 119.8, 115.7 (d,  $J = 21.2$  Hz), 111.5; IR (thin film) 3573, 3420, 3046, 1656, 1605, 1537, 1500, 836, 742  $\text{cm}^{-1}$ ; HRMS (ESI)  $m/z$  calcd for

$C_{21}H_{16}FN_2[M+H]^+$ : 315.1292, found: 315.1291.

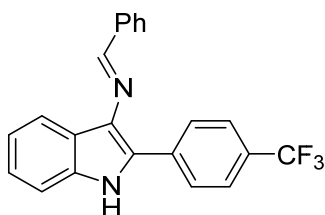

**3ha**

**(E)-N-Benzylidene-2-(4-(trifluoromethyl)phenyl)-1H-indol-3-amine (3ha)**, a yellow solid, 0.079 g, 72% yield. Mp: 172–173 °C;  $^1H$  NMR (400 MHz,  $CDCl_3$ ):  $\delta$  9.08 (s, 1H), 8.27 (brs, 1H), 7.99 (d,  $J = 7.6$  Hz, 2H), 7.92–7.88 (m, 3H), 7.66 (d,  $J = 8.0$  Hz, 2H), 7.48 (d,  $J = 6.0$  Hz, 3H), 7.35 (d,  $J = 8.0$  Hz, 1H), 7.27–7.18 (m, 2H);  $^{13}C$  NMR (100 MHz,  $CDCl_3$ ):  $\delta$  157.7, 137.4, 135.8, 135.1, 130.6, 129.8, 129.1 (q,  $J = 30.8$  Hz), 128.8, 128.1, 127.7, 127.4, 125.6 (q,  $J = 269.8$  Hz), 125.5 (q,  $J = 4.6$  Hz), 123.8, 122.9, 121.7, 120.0, 111.7; IR (thin film) 3574, 3436, 3055, 1674, 1603, 1573, 849, 739  $cm^{-1}$ ; HRMS (ESI)  $m/z$  calcd for  $C_{22}H_{16}F_3N_2 [M+H]^+$ : 365.1260, found: 365.1290.

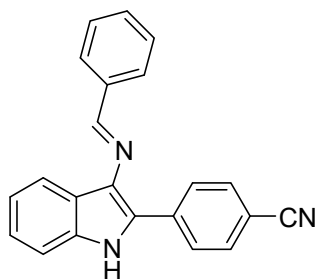

**3ia**

**(E)-4-(3-(benzylideneamino)-1H-indol-2-yl)benzonitrile (3ia)**, a yellow solid, 0.075 g, 78% yield. Mp: 187–188 °C;  $^1H$  NMR (400 MHz,  $CDCl_3$ ):  $\delta$  9.12 (s, 1H), 8.33 (s, 1H), 8.08 (d,  $J = 8.4$  Hz, 2H), 7.96–7.91 (m, 3H), 7.75 (d,  $J = 8.4$  Hz, 2H), 7.52–7.50 (m, 3H), 7.45 (d,  $J = 8.0$  Hz, 2H), 7.32 (t,  $J = 7.6$  Hz, 2H), 7.24 (d,  $J = 8.0$  Hz, 2H);  $^{13}C$  NMR (100 MHz,  $CDCl_3$ ):  $\delta$  158.4, 137.2, 136.1, 136.0, 132.3, 130.9, 128.9, 128.8, 128.4, 128.2, 127.8, 124.3, 121.6, 121.4, 120.1, 119.0, 111.8, 110.2. IR (thin film) 3437, 2918, 2320, 2228, 1638, 1602, 1492, 841, 737  $cm^{-1}$ ; HRMS (ESI)  $m/z$  calcd for  $C_{22}H_{15}N_3 [M+H]^+$ : 322.1339, found: 322.1338.

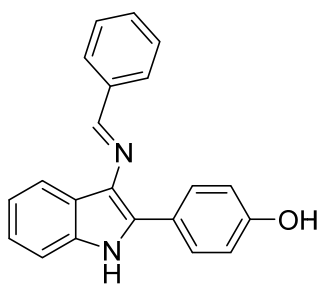

**3ja**

**(E)-4-(3-(benzylideneamino)-1H-indol-2-yl)phenol (3ja)**, a green solid, 0.059 g, 63% yield. Mp: 211–212 °C;  $^1\text{H}$  NMR (400 MHz,  $\text{CDCl}_3$ ):  $\delta$  9.14 (s, 1H), 8.21 (s, 1H), 7.94 (d,  $J = 7.6$  Hz, 1H), 7.82 (d,  $J = 8.8$  Hz, 4H), 7.49–7.43 (m, 3H), 7.39 (d,  $J = 7.6$  Hz, 1H), 7.23–7.17 (m, 2H), 6.94 (d,  $J = 8.4$  Hz, 2H).  $^{13}\text{C}$  NMR (100 MHz,  $\text{CDCl}_3$ ):  $\delta$  155.9, 155.4, 137.8, 135.3, 132.4, 130.1, 129.5, 128.6, 127.8, 124.8, 124.5, 122.7, 122.1, 120.9, 119.6, 115.6, 111.3. IR (thin film) 3465, 3405, 2063, 1637, 1439, 1261, 732, 686  $\text{cm}^{-1}$ ; HRMS (ESI)  $m/z$  calcd for  $\text{C}_{21}\text{H}_{16}\text{N}_2\text{O}$   $[\text{M}+\text{H}]^+$ : 313.1335, found: 313.1333.

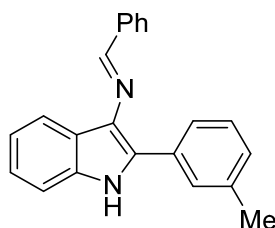

**3ka**

**(E)-N-Benzylidene-2-(m-tolyl)-1H-indol-3-amine (3ka)**, a yellow oil, 0.083 g, 90% yield.  $^1\text{H}$  NMR (400 MHz,  $\text{CDCl}_3$ ):  $\delta$  9.08 (s, 1H), 8.18 (brs, 1H), 7.92 (d,  $J = 6.4$  Hz, 3H), 7.72 (s, 1H), 7.69 (d,  $J = 7.6$  Hz, 1H), 7.46–7.40 (m, 3H), 7.33–7.30 (m, 2H), 7.32 (dd,  $J = 6.8$  Hz, 14.4 Hz, 2H), 7.15–7.11 (m, 1H), 2.39 (s, 3H);  $^{13}\text{C}$  NMR (100 MHz,  $\text{CDCl}_3$ ):  $\delta$  156.2, 138.0, 137.9, 135.4, 132.1, 131.6, 130.1, 128.7, 128.6, 128.4, 128.3, 128.0, 125.8, 125.1, 122.9, 122.0, 120.8, 119.7, 111.5, 21.6; IR (thin film) 3574, 3412, 3050, 2921, 1651, 1603, 1573, 1451, 1370, 739  $\text{cm}^{-1}$ ; HRMS (ESI)  $m/z$  calcd for  $\text{C}_{22}\text{H}_{19}\text{N}_2$   $[\text{M}+\text{H}]^+$ : 311.1543, found: 311.1543.

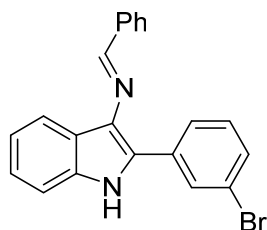

**3la**

**(E)-N-Benzylidene-2-(3-bromophenyl)-1H-indol-3-amine (3la)**, a yellow oil, 0.106 g, 94% yield;  $^1\text{H}$  NMR (400 MHz,  $\text{CDCl}_3$ ):  $\delta$  9.06 (s, 1H), 8.22 (brs, 1H), 8.12 (s, 1H), 7.93–7.88 (m, 3H), 7.78 (d,  $J = 7.6$  Hz, 1H), 7.48–7.42 (m, 3H), 7.40 (d,  $J = 7.6$  Hz, 1H), 7.33 (d,  $J = 8.0$  Hz, 1H), 7.26–7.15 (m, 3H);  $^{13}\text{C}$  NMR (100 MHz,  $\text{CDCl}_3$ ):  $\delta$  156.9, 137.6, 135.6, 133.7, 130.7, 130.4, 130.2, 130.1, 129.9, 128.7, 128.1, 126.6, 126.1, 123.5, 122.6, 121.7, 121.1, 119.9, 111.6; IR (thin film) 3574, 3433, 3016, 1650, 1620, 1594, 736, 687  $\text{cm}^{-1}$ ; HRMS (ESI)  $m/z$  calcd for  $\text{C}_{21}\text{H}_{16}\text{BrN}_2$   $[\text{M}+\text{H}]^+$ : 375.0491, found: 375.0514.

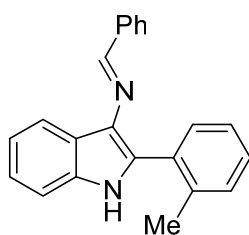

**3ma**

**(E)-N-Benzylidene-2-(o-tolyl)-1H-indol-3-amine (3ma)**, a yellow oil, 0.073 g, 78% yield;  $^1\text{H}$  NMR (400 MHz,  $\text{CDCl}_3$ ):  $\delta$  8.91 (s, 1H), 8.05 (brs, 1H), 7.98–7.96 (m, 1H), 7.76 (d,  $J = 4.0$  Hz, 2H), 7.41 (d,  $J = 7.2$  Hz, 1H), 7.38–7.28 (m, 6H), 7.22 (t,  $J = 4.0$  Hz, 3H), 2.33 (s, 3H);  $^{13}\text{C}$  NMR (100 MHz,  $\text{CDCl}_3$ ):  $\delta$  155.6, 137.7, 137.6, 135.2, 132.6, 131.7, 130.9, 130.5, 130.0, 128.5, 128.4, 127.7, 126.0, 125.6, 122.6, 122.1, 120.7, 119.7, 111.3, 20.7; IR (thin film) 3404, 3057, 2963, 1608, 1573, 1451, 1369, 1329, 740  $\text{cm}^{-1}$ ; HRMS (ESI)  $m/z$  calcd for  $\text{C}_{22}\text{H}_{19}\text{N}_2$   $[\text{M}+\text{H}]^+$ : 311.1543, found: 311.1545.



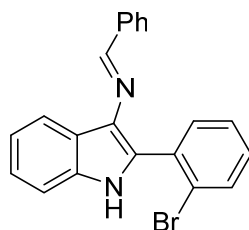

**3na**

**(E)-N-Benzylidene-2-(2-bromophenyl)-1H-indol-3-amine (3na)**, a yellow solid, 0.067 g, 60% yield. Mp: 121–122 °C;  $^1\text{H}$  NMR (400 MHz,  $\text{CDCl}_3$ ):  $\delta$  9.01 (s, 1H), 8.49 (brs, 1H), 7.99 (d,  $J = 7.6$  Hz, 1H), 7.82 (d,  $J = 5.6$  Hz, 2H), 7.70–7.65 (m, 2H), 7.38–7.31 (m, 5H), 7.28–7.19 (m, 3H);  $^{13}\text{C}$  NMR (100 MHz,  $\text{CDCl}_3$ ):  $\delta$  156.5, 137.7, 134.9, 134.3, 133.4, 132.4, 130.8, 130.2, 129.5, 128.6, 127.9, 127.0, 126.7, 123.2, 122.6, 121.3, 120.8, 119.9, 111.6; IR (thin film) 3573, 3265, 3050, 1610, 1575, 924, 767, 698  $\text{cm}^{-1}$ ; HRMS (ESI)  $m/z$  calcd for  $\text{C}_{21}\text{H}_{16}\text{BrN}_2$   $[\text{M}+\text{H}]^+$ : 375.0491, found: 375.0471.

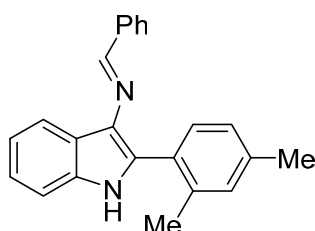

**3oa**

**(E)-N-Benzylidene-2-(2,4-dimethylphenyl)-1H-indol-3-amine (3oa)**, a yellow solid, 0.087 g, 89% yield. Mp: 119–120 °C;  $^1\text{H}$  NMR (400 MHz,  $\text{CDCl}_3$ ):  $\delta$  8.93 (s, 1H), 8.03 (brs, 1H), 7.99 (d,  $J = 6.4$  Hz, 1H), 7.79 (d,  $J = 5.6$  Hz, 2H), 7.38–7.33 (m, 5H), 7.22 (d,  $J = 4.0$  Hz, 2H), 7.12 (s, 1H), 7.08 (d,  $J = 7.6$  Hz, 1H), 2.38 (s, 3H), 2.33 (s, 3H);  $^{13}\text{C}$  NMR (100 MHz,  $\text{CDCl}_3$ ):  $\delta$  155.4, 138.3, 137.8, 137.4, 135.2, 132.8, 131.4, 130.8, 129.9, 128.8, 128.5, 127.7, 126.4, 125.9, 122.5, 122.2, 120.7, 119.7, 111.2, 21.2, 20.7; IR (thin film) 3178, 3055, 2963, 2918, 1652, 1614, 1428, 1370, 808  $\text{cm}^{-1}$ ; HRMS (ESI)  $m/z$  calcd for  $\text{C}_{23}\text{H}_{21}\text{N}_2$   $[\text{M}+\text{H}]^+$ : 325.1699, found: 325.1700.

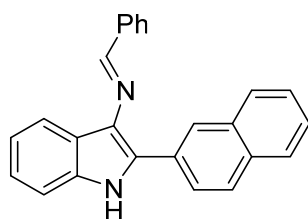

**3pa**

**(E)-N-Benzylidene-2-(naphthalen-2-yl)-1H-indol-3-amine (3pa)**, a yellow oil, 0.091 g, 88% yield;  $^1\text{H}$  NMR (400 MHz,  $\text{CDCl}_3$ ):  $\delta$  9.05 (s, 1H), 8.21 (brs, 1H), 8.20 (s, 1H), 8.03 (d,  $J = 8.4$  Hz, 1H), 7.92–7.87 (m, 3H), 7.79–7.75 (m, 3H), 7.43–7.39 (m, 5H), 7.26 (d,  $J = 6.8$  Hz, 1H), 7.20–7.13 (m, 2H);  $^{13}\text{C}$  NMR (100 MHz,  $\text{CDCl}_3$ ):  $\delta$  156.5, 137.8, 135.6, 133.4, 132.5, 131.9, 130.2, 129.2, 128.7, 128.2, 128.0, 127.9, 127.8, 127.6, 126.8, 126.3, 126.1, 125.8, 123.1, 122.0, 120.9, 119.8, 111.5; IR (thin film) 3574, 3425, 3053, 1621, 1573, 1016, 856, 743  $\text{cm}^{-1}$ ; HRMS (ESI)  $m/z$  calcd for  $\text{C}_{25}\text{H}_{19}\text{N}_2$   $[\text{M}+\text{H}]^+$ : 347.1543, found: 347.1571.

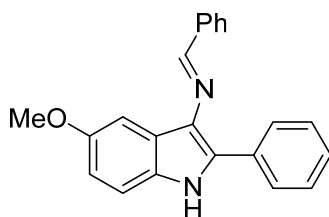

**3qa**

**(E)-N-Benzylidene-5-methoxy-2-phenyl-1H-indol-3-amine (3qa)**, a yellow oil, 0.067 g, 68% yield;  $^1\text{H}$  NMR (400 MHz,  $\text{CDCl}_3$ ):  $\delta$  9.05 (s, 1H), 8.17 (brs, 1H), 7.93–7.89 (m, 4H), 7.47–7.43 (m, 5H), 7.38 (s, 1H), 7.34–7.31 (m, 1H), 7.29–7.24 (m, 1H), 6.91–6.89 (m, 1H), 3.87 (s, 3H);  $^{13}\text{C}$  NMR (100 MHz,  $\text{CDCl}_3$ ):  $\delta$  156.1, 155.0, 137.7, 132.6, 131.8, 130.7, 130.1, 128.6, 128.5, 127.9, 127.8, 127.5, 125.8, 122.3, 112.4, 112.1, 102.5, 56.1; IR (thin film) 3575, 3413, 2927, 1616, 1528, 1481, 1210, 690  $\text{cm}^{-1}$ ; HRMS (ESI)  $m/z$  calcd for  $\text{C}_{22}\text{H}_{18}\text{KN}_2\text{O}$   $[\text{M}+\text{K}]^+$ : 365.1051, found: 365.1071.

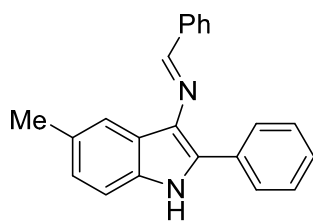

**3ra**

**(E)-N-Benzylidene-5-methyl-2-phenyl-1H-indol-3-amine (3ra)**, a yellow oil, 0.086 g, 93% yield.  $^1\text{H}$  NMR (400 MHz,  $\text{CDCl}_3$ ):  $\delta$  9.08 (s, 1H), 8.10 (brs, 1H), 7.94 (d,  $J = 7.2$  Hz, 2H), 7.88 (d,  $J = 8.0$  Hz, 2H), 7.69 (s, 1H), 7.47–7.41 (m, 5H), 7.32 (t,  $J = 7.2$  Hz, 1H), 7.22 (d,  $J = 8.0$  Hz, 1H), 7.05 (d,  $J = 8.0$  Hz, 1H), 2.47 (s, 3H);  $^{13}\text{C}$  NMR (100 MHz,  $\text{CDCl}_3$ ):  $\delta$  156.2, 137.8, 133.8, 132.1, 131.9, 130.2, 130.0, 128.6, 128.5, 127.9, 127.8, 127.4, 125.6, 124.6, 122.2, 119.5, 111.2, 21.4; IR (thin film) 3574, 3379, 3056, 2917, 1591, 1573, 1449, 1309, 769  $\text{cm}^{-1}$ ; HRMS (ESI)  $m/z$  calcd for  $\text{C}_{22}\text{H}_{19}\text{N}_2$   $[\text{M}+\text{H}]^+$ : 311.1543, found: 311.1569.

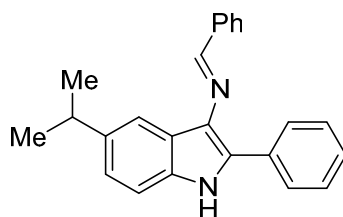

**3sa**

**(E)-N-Benzylidene-5-isopropyl-2-phenyl-1H-indol-3-amine (3sa)**, a yellow oil, 0.098 g, 97% yield.  $^1\text{H}$  NMR (400 MHz,  $\text{CDCl}_3$ ):  $\delta$  9.09 (s, 1H), 8.14 (brs, 1H), 7.94 (d,  $J = 6.8$  Hz, 2H), 7.86 (d,  $J = 7.6$  Hz, 2H), 7.73 (brs, 1H), 7.46–7.38 (m, 5H), 7.30–7.27 (m, 1H), 7.24 (d,  $J = 8.4$  Hz, 1H), 7.11 (d,  $J = 8.0$  Hz, 1H), 3.06–2.99 (m, 1H), 1.33 (d,  $J = 6.8$  Hz, 6H).  $^{13}\text{C}$  NMR (100 MHz,  $\text{CDCl}_3$ ):  $\delta$  156.3, 141.7, 137.8, 134.1, 132.1, 131.9, 130.1, 128.6, 128.5, 127.9, 127.9, 127.4, 125.8, 122.1, 122.0, 116.8, 111.3, 34.4, 24.6. IR (thin film) 3575, 3413, 2927, 1616, 1528, 1481, 1370, 690  $\text{cm}^{-1}$ ; HRMS (ESI)  $m/z$  calcd for  $\text{C}_{24}\text{H}_{23}\text{N}_2$   $[\text{M}+\text{H}]^+$ : 339.1856, found: 339.1855.

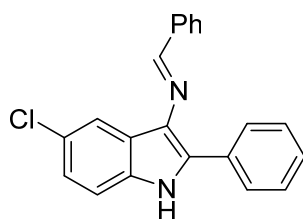

**3ta**

**(E)-N-Benzylidene-5-chloro-2-phenyl-1H-indol-3-amine (3ta)**, a yellow oil, 0.088 g, 89% yield;  $^1\text{H}$  NMR (400 MHz,  $\text{CDCl}_3$ ):  $\delta$  8.97 (s, 1H), 8.28 (brs, 1H), 7.91 (d,  $J = 6.0$  Hz, 2H), 7.85 (d,  $J = 7.6$  Hz, 3H), 7.46–7.41 (m, 5H), 7.34 (t,  $J = 7.2$  Hz, 1H), 7.23–7.21 (m, 1H), 7.11 (d,  $J = 10.0$  Hz, 1H).  $^{13}\text{C}$  NMR (100 MHz,  $\text{CDCl}_3$ ):  $\delta$  157.1, 137.4, 133.7, 132.9, 131.3, 130.4, 128.7, 128.6, 128.1, 127.9, 127.8, 126.5, 125.4, 123.2, 122.9, 119.1, 112.4. IR (thin film) 3573, 3433, 3305, 3065, 1641, 1603, 1572, 797, 683  $\text{cm}^{-1}$ ; HRMS (ESI)  $m/z$  calcd for  $\text{C}_{21}\text{H}_{16}\text{ClN}_2$   $[\text{M}+\text{H}]^+$ : 331.0997, found: 331.1018.

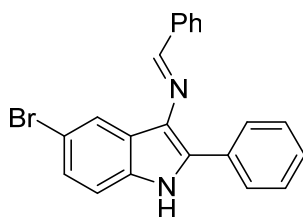

**3ua**

**(E)-N-Benzylidene-5-bromo-2-phenyl-1H-indol-3-amine (3ua)**, a yellow oil, 0.094 g, 84% yield;  $^1\text{H}$  NMR (400 MHz,  $\text{CDCl}_3$ ):  $\delta$  8.98 (s, 1H), 8.21 (brs, 1H), 7.99 (s, 1H), 7.93 (d,  $J = 5.6$  Hz, 2H), 7.87 (d,  $J = 7.6$  Hz, 2H), 7.45–7.42 (m, 5H), 7.36–7.28 (m, 2H), 7.24 (t,  $J = 8.0$  Hz, 1H).  $^{13}\text{C}$  NMR (100 MHz,  $\text{CDCl}_3$ ):  $\delta$  157.1, 137.4, 133.9, 132.6, 131.2, 130.4, 128.7, 128.6, 128.0, 127.9, 127.8, 125.7, 125.3, 123.5, 122.1, 114.0, 112.8. IR (thin film) 3573, 3265, 1610, 1575, 924, 767, 698  $\text{cm}^{-1}$ ; HRMS (ESI)  $m/z$  calcd for  $\text{C}_{21}\text{H}_{16}\text{BrN}_2$   $[\text{M}+\text{H}]^+$ : 375.0491, found: 375.0511.

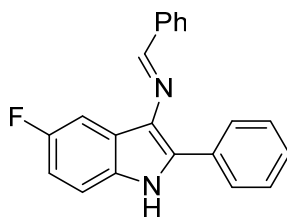

**3va**

**(E)-N-(5-Fluoro-2-phenyl-1H-indol-3-yl)-1-phenylmethanimine (3va)**, a yellow oil, 0.071 g, 75% yield.  $^1\text{H}$  NMR (400 MHz,  $\text{CDCl}_3$ ):  $\delta$  8.99 (s, 1H), 8.23 (brs, 1H), 7.92–7.87 (m, 4H), 7.57 (d,  $J = 7.2$  Hz, 1H), 7.46–7.43 (m, 5H), 7.36 (t,  $J = 7.2$  Hz, 1H), 7.28–7.23 (m, 1H), 6.99–6.95 (m, 1H).  $^{13}\text{C}$  NMR (100 MHz,  $\text{CDCl}_3$ ):  $\delta$  159.7 (d,  $J = 234.0$  Hz), 156.5, 137.5, 133.6, 131.8, 131.4, 130.3, 128.7, 128.6, 128.0, 127.9, 127.8, 125.9 (d,  $J = 4.0$  Hz), 122.0 (d,  $J = 9.5$  Hz), 112.1 (d,  $J = 9.5$  Hz), 111.3 (d,  $J = 26.4$  Hz), 105.1 (d,  $J = 24.0$  Hz). IR (thin film) 3573, 3365, 1630, 1577, 928, 769, 688  $\text{cm}^{-1}$ ; HRMS (ESI)  $m/z$  calcd for  $\text{C}_{21}\text{H}_{14}\text{FN}_2$   $[\text{M}-\text{H}]^-$ : 313.1141, found: 313.1158.

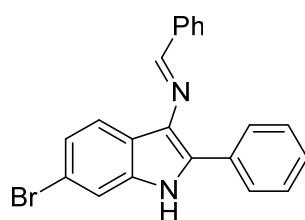

**3wa**

**(E)-N-Benzylidene-6-bromo-2-phenyl-1H-indol-3-amine (3wa)**, a yellow oil, 0.102 g, 91% yield.  $^1\text{H}$  NMR (400 MHz,  $\text{CDCl}_3$ ):  $\delta$  8.99 (s, 1H), 8.24 (brs, 1H), 7.91 (d,  $J = 5.6$  Hz, 2H), 7.85 (d,  $J = 7.6$  Hz, 2H), 7.72 (d,  $J = 8.4$  Hz, 1H), 7.45–7.41 (m, 6H), 7.35 (t,  $J = 6.8$  Hz, 1H), 7.26 (d,  $J = 9.6$  Hz, 1H).  $^{13}\text{C}$  NMR (100 MHz,  $\text{CDCl}_3$ ):  $\delta$  157.3, 137.4, 136.1, 132.1, 131.2, 130.5, 128.7, 128.6, 128.0, 127.9, 127.8, 125.9, 124.1, 120.9, 120.8, 116.3, 114.4. IR (thin film) 3573, 3423, 3068, 1651, 1595, 1528, 796, 691  $\text{cm}^{-1}$ ; HRMS (ESI)  $m/z$  calcd for  $\text{C}_{21}\text{H}_{16}\text{BrN}_2$   $[\text{M}+\text{H}]^+$ : 375.0491, found: 375.0503.

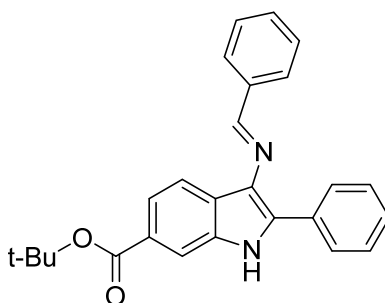

**3xa**

**tert-Butyl (E)-3-(benzylideneamino)-2-phenyl-1H-indole-6-carboxylate (3xa)**, a yellow solid, 0.064 g, 54% yield. Mp: 166–167  $^\circ\text{C}$ ;  $^1\text{H}$  NMR (400 MHz,  $\text{CDCl}_3$ ):  $\delta$

9.11 (s, 1H), 8.56 (s, 1H), 8.11 (s, 1H), 7.97-7.94 (m, 4H), 7.92 (d,  $J = 8.4$  Hz, 1H), 7.84 (d,  $J = 8.8$  Hz, 1H), 7.52-7.46 (m, 5H), 7.40 (d,  $J = 7.6$  Hz, 1H), 1.63 (s, 9H);  $^{13}\text{C}$  NMR (100 MHz,  $\text{CDCl}_3$ ):  $\delta$  166.4, 157.5, 137.5, 134.7, 134.4, 131.3, 130.5, 128.7, 128.2, 128.1, 126.4, 126.2, 124.9, 121.9, 118.9, 113.4, 80.7, 28.3; IR (thin film) 3437, 1710, 1638, 1452, 1224, 1096, 948, 745, 689, 642  $\text{cm}^{-1}$ ; HRMS (ESI)  $m/z$  calcd for  $\text{C}_{26}\text{H}_{24}\text{N}_2\text{O}_2$   $[\text{M}+\text{H}]^+$ : 397.1911, found: 397.1908.

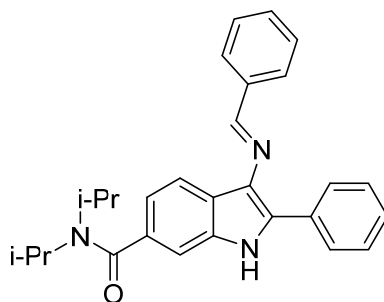

**3ya**

**(E)-3-(Benzylideneamino)-N,N-diisopropyl-2-phenyl-1H-indole-6-carboxamide (3ya)**, a yellow solid, 0.080 g, 63% yield. Mp: 149–150 °C;  $^1\text{H}$  NMR (400 MHz,  $\text{CDCl}_3$ ):  $\delta$  10.07 (s, 1H), 8.93 (s, 1H), 8.00 (d,  $J = 7.6$  Hz, 1H), 7.86-7.84 (m, 2H), 7.64 (d,  $J = 8.0$  Hz, 1H), 7.43-7.39 (m, 6H), 7.31–7.25 (m, 1H), 6.83 (d,  $J = 8.0$  Hz, 1H), 3.96-3.94 (m, 1H), 3.58-3.54 (m, 1H), 1.54-1.52 (m, 6H), 1.17-1.15 (m, 6H).  $^{13}\text{C}$  NMR (100 MHz,  $\text{CDCl}_3$ ):  $\delta$  172.5, 155.9, 137.8, 135.4, 133.8, 132.2, 131.9, 129.9, 128.5, 128.3, 128.2, 127.9, 127.3, 125.4, 121.7, 119.0, 117.3, 110.4, 20.8 (the carbon connected with N-atom of amide was not signal). IR (thin film) 3452, 2067, 1615, 1444, 1343, 1245, 762, 691  $\text{cm}^{-1}$ ; HRMS (ESI)  $m/z$  calcd for  $\text{C}_{28}\text{H}_{29}\text{N}_3\text{O}$   $[\text{M}+\text{H}]^+$ : 424.2383, found: 424.2375.

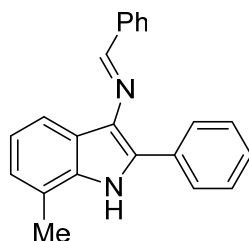

**3za**

**(E)-N-Benzylidene-7-methyl-2-phenyl-1H-indol-3-amine (3za)**, a yellow oil, 0.092 g, 99% yield.  $^1\text{H}$  NMR (400 MHz,  $\text{CDCl}_3$ ):  $\delta$  9.10 (s, 1H), 8.09 (brs, 1H), 7.95 (t,  $J =$

6.8 Hz, 4H), 7.79 (d,  $J = 8.0$  Hz, 1H), 7.48–7.41 (m, 5H), 7.35 (t,  $J = 7.6$  Hz, 1H), 7.13–7.09 (m, 1H), 7.05 (d,  $J = 7.2$  Hz, 1H), 2.51 (s, 3H).  $^{13}\text{C}$  NMR (100 MHz,  $\text{CDCl}_3$ ):  $\delta$  156.5, 137.8, 134.9, 131.9, 131.7, 130.1, 128.6, 128.5, 128.0, 127.9, 127.5, 126.5, 123.7, 121.6, 121.1, 120.5, 117.6, 16.4. IR (thin film) 3573, 3433, 3008, 2963, 1660, 1607, 1599, 1448, 1323, 801  $\text{cm}^{-1}$ ; HRMS (ESI)  $m/z$  calcd for  $\text{C}_{22}\text{H}_{19}\text{N}_2$   $[\text{M}+\text{H}]^+$ : 311.1543, found: 311.1549.

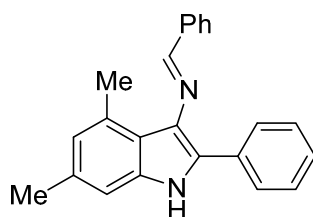

**3aaa**

**(E)-N-Benzylidene-4,6-dimethyl-2-phenyl-1H-indol-3-amine (3aaa)**, a yellow oil, 0.083 g, 85% yield.  $^1\text{H}$  NMR (400 MHz,  $\text{CDCl}_3$ ):  $\delta$  8.38 (s, 1H), 7.86 (brs, 1H), 7.82 (d,  $J = 7.2$  Hz, 2H), 7.58 (d,  $J = 7.6$  Hz, 2H), 7.43 (d,  $J = 6.4$  Hz, 3H), 7.33 (t,  $J = 7.6$  Hz, 2H), 7.21 (t,  $J = 7.2$  Hz, 1H), 6.91 (s, 1H), 6.71 (s, 1H), 2.58 (s, 3H), 2.39 (s, 3H).  $^{13}\text{C}$  NMR (100 MHz,  $\text{CDCl}_3$ ):  $\delta$  162.3, 136.7, 135.8, 132.9, 132.5, 130.7, 129.9, 128.9, 128.7, 128.2, 127.1, 127.0, 126.8, 123.8, 123.6, 121.2, 108.6, 21.5, 20.3. IR (thin film) 3399, 3058, 2919, 1690, 1613, 1537, 1448, 1377, 692  $\text{cm}^{-1}$ ; HRMS (ESI)  $m/z$  calcd for  $\text{C}_{23}\text{H}_{19}\text{N}_2$   $[\text{M}-\text{H}]^-$ : 323.1553, found: 323.1562.

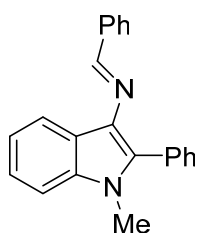

**3aab**

**(E)-N-Benzylidene-1-methyl-2-phenyl-1H-indol-3-amine (3aab)**, a yellow oil, 0.056 g, 60% yield;  $^1\text{H}$  NMR (400 MHz,  $\text{CDCl}_3$ ):  $\delta$  9.07 (s, 1H), 8.03 (d,  $J = 8.0$  Hz, 1H), 7.82 (d,  $J = 6.8$  Hz, 2H), 7.59 (d,  $J = 7.2$  Hz, 2H), 7.52 (t,  $J = 7.2$  Hz, 2H), 7.44–7.36 (m, 5H), 7.34 (t,  $J = 7.6$  Hz, 1H), 7.26–7.23 (m, 1H), 3.75 (s, 3H).  $^{13}\text{C}$  NMR (100 MHz,  $\text{CDCl}_3$ ):  $\delta$  154.9, 138.1, 137.2, 136.8, 131.4, 130.7, 129.8, 128.5, 128.0, 127.9, 127.7, 125.5, 122.5, 121.0, 120.8, 119.8, 110.0, 31.4. IR (thin film) 3430,

2858, 2245, 1651, 1607, 1528, 1446, 1304, 764  $\text{cm}^{-1}$ ; HRMS (ESI)  $m/z$  calcd for  $\text{C}_{22}\text{H}_{19}\text{N}_2$   $[\text{M}+\text{H}]^+$ : 311.1543, found: 311.1533.

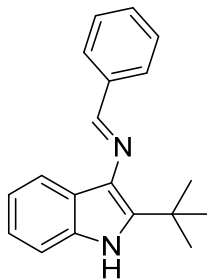

**3aad**

**(E)-N-(2-(tert-Butyl)-1H-indol-3-yl)-1-phenylmethanimine (3aad)**, a red oil, 0.078 g, 95% yield;  $^1\text{H}$  NMR (400 MHz,  $\text{CDCl}_3$ ):  $\delta$  8.98 (s, 1H), 8.04 (s, 1H), 7.91-7.88 (m, 3H), 7.47 (t,  $J = 7.2$  Hz, 2H), 7.41 (t,  $J = 7.2$  Hz, 1H), 7.34 (t,  $J = 7.6$  Hz, 1H), 7.16-7.14 (m, 2H), 1.59 (s, 9H).  $^{13}\text{C}$  NMR (100 MHz,  $\text{CDCl}_3$ ):  $\delta$  152.4, 142.9, 138.4, 133.4, 129.6, 128.6, 127.4, 123.7, 121.9, 121.5, 120.6, 119.3, 111.2, 33.2, 29.9. IR (thin film) 3451, 2951, 1637, 1454, 1429, 798, 743, 691  $\text{cm}^{-1}$ ; HRMS (ESI)  $m/z$  calcd for  $\text{C}_{19}\text{H}_{20}\text{N}_2$   $[\text{M}+\text{H}]^+$ : 277.1699, found: 277.1696.

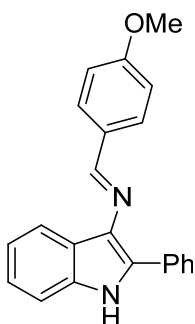

**3ab**

**(E)-N-(4-Methoxybenzylidene)-2-phenyl-1H-indol-3-amine (3ab)**, a yellow oil, 0.093 g, 95% yield;  $^1\text{H}$  NMR (400 MHz,  $\text{CDCl}_3$ ):  $\delta$  8.99 (s, 1H), 8.20 (brs, 1H), 7.87-7.83 (m, 5H), 7.41 (t,  $J = 7.6$  Hz, 2H), 7.29 (d,  $J = 7.6$  Hz, 2H), 7.20-7.12 (m, 2H), 6.96 (d,  $J = 8.4$  Hz, 2H), 3.80 (s, 3H);  $^{13}\text{C}$  NMR (100 MHz,  $\text{CDCl}_3$ ):  $\delta$  161.4, 156.5, 135.4, 131.8, 130.9, 130.7, 129.5, 128.5, 127.7, 127.3, 126.2, 122.8, 122.1, 120.6, 119.6, 114.1, 111.5, 55.3. IR (thin film) 3573, 3391, 2928, 1652, 1602, 1573, 1447, 1305, 1240, 732  $\text{cm}^{-1}$ ; HRMS (ESI)  $m/z$  calcd for  $\text{C}_{22}\text{H}_{19}\text{N}_2\text{O}$   $[\text{M}+\text{H}]^+$ : 327.1492, found: 327.1488.



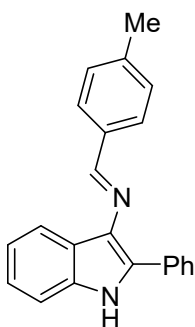

**3ac**

**(E)-N-(4-Methylbenzylidene)-2-phenyl-1H-indol-3-amine (3ac)**, a yellow solid, 0.088 g, 95% yield. Mp: 132–133 °C;  $^1\text{H}$  NMR (400 MHz,  $\text{CDCl}_3$ ):  $\delta$  9.04 (s, 1H), 8.19 (brs, 1H), 7.90–7.85 (m, 3H), 7.82 (d,  $J = 7.6$  Hz, 2H), 7.43 (t,  $J = 7.6$  Hz, 2H), 7.31 (d,  $J = 7.6$  Hz, 2H), 7.27–7.23 (m, 2H), 7.21–7.15 (m, 2H), 2.38 (s, 3H).  $^{13}\text{C}$  NMR (100 MHz,  $\text{CDCl}_3$ ):  $\delta$  156.9, 140.5, 135.5, 135.2, 131.8, 131.4, 129.4, 128.5, 128.0, 127.9, 127.4, 126.1, 122.9, 122.1, 120.7, 119.7, 111.5, 21.5. IR (thin film) 3573, 3435, 3049, 2921, 1639, 1596, 1490, 1446, 1370, 735  $\text{cm}^{-1}$ ; HRMS (ESI)  $m/z$  calcd for  $\text{C}_{22}\text{H}_{19}\text{N}_2$   $[\text{M}+\text{H}]^+$ : 311.1543, found: 311.1537.

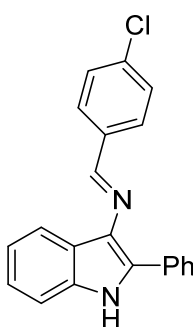

**3ad**

**(E)-N-(4-Chlorobenzylidene)-2-phenyl-1H-indol-3-amine (3ad)**, a yellow solid, 0.083 g, 84% yield. Mp: 150–151 °C;  $^1\text{H}$  NMR (400 MHz,  $\text{CDCl}_3$ ):  $\delta$  9.04 (s, 1H), 8.22 (brs, 1H), 7.91–7.86 (m, 3H), 7.82 (d,  $J = 8.4$  Hz, 2H), 7.46–7.39 (m, 4H), 7.35 (d,  $J = 7.6$  Hz, 2H), 7.24–7.16 (m, 2H).  $^{13}\text{C}$  NMR (100 MHz,  $\text{CDCl}_3$ ):  $\delta$  154.5, 136.3, 135.9, 135.9, 132.5, 131.6, 129.0, 128.9, 128.6, 128.0, 127.7, 125.5, 123.1, 121.9, 121.1, 119.8, 111.5. IR (thin film) 3573, 3408, 3052, 1639, 1607, 1576, 817, 743  $\text{cm}^{-1}$ ; HRMS (ESI)  $m/z$  calcd for  $\text{C}_{21}\text{H}_{16}\text{ClN}_2$   $[\text{M}+\text{H}]^+$ : 331.0977, found: 331.0994.

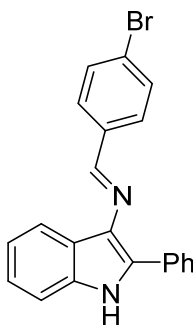

**3ae**

**(E)-N-(4-Bromobenzylidene)-2-phenyl-1H-indol-3-amine (3ae)**, a yellow solid, 0.091 g, 81% yield. Mp: 156–157 °C;  $^1\text{H}$  NMR (400 MHz,  $\text{CDCl}_3$ ):  $\delta$  8.97 (s, 1H), 8.17 (brs, 1H), 7.87 (d,  $J = 7.6$  Hz, 1H), 7.82 (d,  $J = 7.6$  Hz, 2H), 7.71 (d,  $J = 8.0$  Hz, 2H), 7.53 (d,  $J = 8.4$  Hz, 2H), 7.43 (t,  $J = 7.6$  Hz, 2H), 7.32 (dd,  $J = 16.0$  Hz, 8.0 Hz, 2H), 7.21–7.14 (m, 2H).  $^{13}\text{C}$  NMR (100 MHz,  $\text{CDCl}_3$ ):  $\delta$  154.5, 136.7, 135.4, 132.6, 131.8, 131.6, 129.2, 128.6, 128.0, 127.7, 125.5, 124.4, 123.1, 121.8, 121.0, 119.8, 111.6. IR (thin film) 3573, 3409, 3062, 1639, 1607, 1528, 820, 736  $\text{cm}^{-1}$ ; HRMS (ESI)  $m/z$  calcd for  $\text{C}_{21}\text{H}_{16}\text{BrN}_2$   $[\text{M}+\text{H}]^+$ : 375.0491, found: 375.0483.

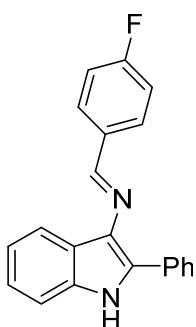

**3af**

**(E)-N-(4-Fluorobenzylidene)-2-phenyl-1H-indol-3-amine (3af)**, a yellow solid, 0.076 g, 80% yield. Mp: 142–143 °C;  $^1\text{H}$  NMR (400 MHz,  $\text{CDCl}_3$ ):  $\delta$  9.04 (s, 1H), 8.21 (brs, 1H), 7.90–7.86 (m, 5H), 7.46 (t,  $J = 7.6$  Hz, 2H), 7.34–7.31 (m, 2H), 7.24–7.17 (m, 2H), 7.15–7.10 (m, 2H).  $^{13}\text{C}$  NMR (100 MHz,  $\text{CDCl}_3$ ):  $\delta$  165.3 (d,  $J = 248.6$  Hz), 155.0, 135.4, 134.1 (d,  $J = 2.2$  Hz), 132.0 (d,  $J = 30.6$  Hz), 129.7, 129.6, 128.6, 128.0, 127.6, 125.7, 123.1, 121.9, 120.9, 119.7, 115.8 (d,  $J = 21.9$  Hz), 111.5. IR (thin film) 3573, 3438, 3049, 1639, 1598, 1527, 825, 736  $\text{cm}^{-1}$ ; HRMS (ESI)  $m/z$  calcd for  $\text{C}_{21}\text{H}_{16}\text{FN}_2$   $[\text{M}+\text{H}]^+$ : 315.1292, found: 315.1291.

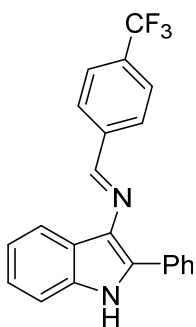

**3ag**

**(E)-2-Phenyl-N-(4-(trifluoromethyl)benzylidene)-1H-indol-3-amine (3ag)**, a yellow solid, 0.097 g, 89% yield. Mp: 115–116 °C;  $^1\text{H}$  NMR (400 MHz,  $\text{CDCl}_3$ ):  $\delta$  9.12 (s, 1H), 8.26 (brs, 1H), 7.99 (d,  $J = 7.6$  Hz, 2H), 7.94 (d,  $J = 8.0$  Hz, 1H), 7.90 (d,  $J = 7.6$  Hz, 2H), 7.69 (d,  $J = 8.0$  Hz, 2H), 7.49 (t,  $J = 7.6$  Hz, 2H), 7.38 (d,  $J = 6.8$  Hz, 2H), 7.27–7.19 (m, 2H).  $^{13}\text{C}$  NMR (100 MHz,  $\text{CDCl}_3$ ):  $\delta$  153.6, 141.1, 135.5, 133.6, 131.7 (q,  $J = 32.1$  Hz), 131.4, 131.1, 128.6, 128.2, 128.0, 127.9, 125.6 (q,  $J = 3.7$  Hz), 125.2 (q,  $J = 247.9$  Hz), 123.3, 121.7, 121.3, 119.9, 111.6. IR (thin film) 3575, 3393, 2924, 1617, 1535, 1478, 1323, 1064, 745  $\text{cm}^{-1}$ ; HRMS (ESI)  $m/z$  calcd for  $\text{C}_{22}\text{H}_{16}\text{F}_3\text{N}_2$   $[\text{M}+\text{H}]^+$ : 365.1260, found: 365.1289.

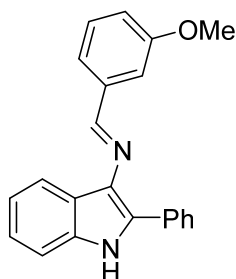

**3ah**

**(E)-N-(3-Methoxybenzylidene)-2-phenyl-1H-indol-3-amine (3ah)**, a yellow solid, 0.078 g, 80% yield. Mp: 134–135 °C;  $^1\text{H}$  NMR (400 MHz,  $\text{CDCl}_3$ ):  $\delta$  9.04 (s, 1H), 8.25 (brs, 1H), 7.91–7.85 (m, 3H), 7.55 (brs, 1H), 7.43–7.36 (m, 3H), 7.34–7.29 (m, 3H), 7.20–7.17 (m, 2H), 6.98 (d,  $J = 6.4$  Hz, 1H), 3.82 (s, 3H).  $^{13}\text{C}$  NMR (100 MHz,  $\text{CDCl}_3$ ):  $\delta$  159.9, 156.1, 139.3, 135.5, 132.1, 131.7, 129.6, 128.5, 128.0, 127.6, 125.7, 123.0, 122.0, 121.3, 120.9, 119.8, 116.9, 111.5, 111.3, 55.2. IR (thin film) 3573, 3402, 2922, 1644, 1607, 1572, 1424, 1375, 733  $\text{cm}^{-1}$ ; HRMS (ESI)  $m/z$  calcd for  $\text{C}_{22}\text{H}_{19}\text{N}_2\text{O}$   $[\text{M}+\text{H}]^+$ : 327.1492, found: 327.1489.

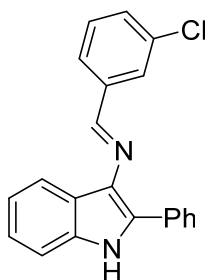

**3ai**

**(E)-N-(3-Chlorobenzylidene)-2-phenyl-1H-indol-3-amine (3ai)**, a yellow solid, 0.083 g, 84% yield. Mp: 172–173 °C;  $^1\text{H}$  NMR (400 MHz,  $\text{CDCl}_3$ ):  $\delta$  9.04 (s, 1H), 8.25 (brs, 1H), 7.92–7.88 (m, 4H), 7.75–7.74 (m, 1H), 7.49 (t,  $J = 7.6$  Hz, 2H), 7.37–7.34 (m, 4H), 7.26–7.18 (m, 2H).  $^{13}\text{C}$  NMR (100 MHz,  $\text{CDCl}_3$ ):  $\delta$  154.1, 139.7, 135.5, 134.8, 132.9, 131.5, 129.9, 129.8, 128.6, 128.1, 127.8, 127.5, 126.1, 125.4, 123.2, 121.9, 121.2, 119.8, 111.6. IR (thin film) 3574, 3443, 3055, 1648, 1594, 1560, 939, 740  $\text{cm}^{-1}$ ; HRMS (ESI)  $m/z$  calcd for  $\text{C}_{21}\text{H}_{16}\text{ClN}_2$   $[\text{M}+\text{H}]^+$ : 331.0997, found: 331.1006.

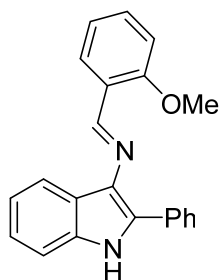

**3aj**

**(E)-N-(2-Methoxybenzylidene)-2-phenyl-1H-indol-3-amine (3aj)**, a yellow solid, 0.081 g, 83% yield. Mp: 194–195 °C;  $^1\text{H}$  NMR (400 MHz,  $\text{CDCl}_3$ ):  $\delta$  9.55 (s, 1H), 8.25 (s, 1H), 8.23 (s, 1H), 7.97–7.92 (m, 3H), 7.47 (t,  $J = 7.6$  Hz, 2H), 7.40–7.30 (m, 3H), 7.24–7.17 (m, 2H), 7.06 (t,  $J = 7.6$  Hz, 1H), 6.96 (d,  $J = 8.4$  Hz, 1H), 3.92 (s, 3H).  $^{13}\text{C}$  NMR (100 MHz,  $\text{CDCl}_3$ ):  $\delta$  159.0, 152.9, 135.5, 131.9, 131.6, 131.4, 128.6, 127.9, 127.4, 127.0, 126.7, 126.3, 123.0, 122.1, 120.9, 120.0, 111.3, 111.1, 55.7. IR (thin film) 3573, 3428, 3052, 2962, 1639, 1590, 1447, 1370, 1243, 740  $\text{cm}^{-1}$ ; HRMS (ESI)  $m/z$  calcd for  $\text{C}_{22}\text{H}_{19}\text{N}_2\text{O}$   $[\text{M}+\text{H}]^+$ : 327.1492, found: 327.1490.

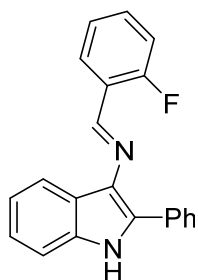

**3ak**

**(E)-N-(2-Fluorobenzylidene)-2-phenyl-1H-indol-3-amine (3ak)**, a yellow solid, 0.072 g, 76% yield. Mp: 153–154 °C;  $^1\text{H}$  NMR (400 MHz,  $\text{CDCl}_3$ ):  $\delta$  9.39 (s, 1H), 8.24–8.18 (m, 2H), 7.96–7.94 (m, 1H), 7.89–7.87 (m, 2H), 7.46–7.42 (m, 2H), 7.37–7.31 (m, 3H), 7.23–7.18 (m, 3H), 7.13–7.08 (m, 1H).  $^{13}\text{C}$  NMR (100 MHz,  $\text{CDCl}_3$ ):  $\delta$  148.8 (d,  $J = 4.4$  Hz), 135.5 (d,  $J = 247.2$  Hz), 131.6, 131.4, 131.3, 128.6, 128.1, 127.7, 127.0, 126.0, 125.6 (d,  $J = 8.7$  Hz), 124.4, 124.3, 123.2, 121.7, 121.2, 119.9, 115.8 ( $J = 21.2$  Hz), 111.5. IR (thin film) 3573, 3434, 3053, 1639, 1559, 1520, 947, 735  $\text{cm}^{-1}$ ; HRMS (ESI)  $m/z$  calcd for  $\text{C}_{21}\text{H}_{16}\text{FN}_2$   $[\text{M}+\text{H}]^+$ : 315.1292, found: 315.1290.

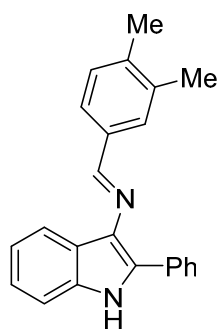

**3al**

**(E)-N-(3,4-Dimethylbenzylidene)-2-phenyl-1H-indol-3-amine (3al)**, a yellow solid, 0.075 g, 78% yield. Mp: 143–144 °C;  $^1\text{H}$  NMR (400 MHz,  $\text{CDCl}_3$ ):  $\delta$  9.05 (s, 1H), 8.24 (brs, 1H), 7.92 (d,  $J = 7.6$  Hz, 3H), 7.73 (s, 1H), 7.67 (d,  $J = 7.6$  Hz, 1H), 7.47 (t,  $J = 7.6$  Hz, 2H), 7.38 (d,  $J = 8.0$  Hz, 1H), 7.34 (t,  $J = 7.6$  Hz, 1H), 7.24–7.15 (m, 3H), 2.33 (s, 3H), 2.32 (s, 3H).  $^{13}\text{C}$  NMR (100 MHz,  $\text{CDCl}_3$ ):  $\delta$  157.4, 139.4, 136.9, 135.5, 135.4, 131.9, 131.1, 130.0, 129.1, 128.6, 127.8, 127.4, 126.3, 125.7, 123.0, 122.2, 120.7, 119.7, 111.4, 19.9, 19.8. IR (thin film) 3573, 3246, 3057, 2918, 1651, 1594, 1447, 1331, 731  $\text{cm}^{-1}$ ; HRMS (ESI)  $m/z$  calcd for  $\text{C}_{23}\text{H}_{21}\text{N}_2$   $[\text{M}+\text{H}]^+$ : 325.1699, found: 325.1696.

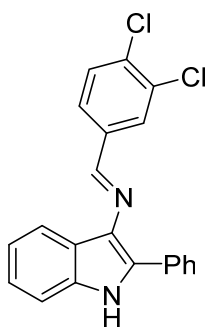

**3am**

**(E)-N-(3,4-Dichlorobenzylidene)-2-phenyl-1H-indol-3-amine (3am)**, a yellow solid, 0.085 g, 78% yield. Mp: 165–166 °C;  $^1\text{H}$  NMR (400 MHz,  $\text{CDCl}_3$ ):  $\delta$  8.90 (s, 1H), 8.19 (brs, 1H), 7.87–7.80 (m, 4H), 7.63 (d,  $J = 7.6$  Hz, 1H), 7.44–7.41 (m, 3H), 7.35–7.27 (m, 2H), 7.22–7.14 (m, 2H).  $^{13}\text{C}$  NMR (100 MHz,  $\text{CDCl}_3$ ):  $\delta$  152.4, 137.9, 135.4, 133.6, 133.4, 132.9, 131.4, 130.5, 129.2, 128.6, 128.1, 127.9, 126.6, 125.0, 123.2, 121.7, 121.2, 119.8, 111.6. IR (thin film) 3573, 3433, 3053, 1650, 1601, 1592, 1550, 819, 740  $\text{cm}^{-1}$ ; HRMS (ESI)  $m/z$  calcd for  $\text{C}_{21}\text{H}_{15}\text{Cl}_2\text{N}_2$   $[\text{M}+\text{H}]^+$ : 365.0607, found: 365.0604.

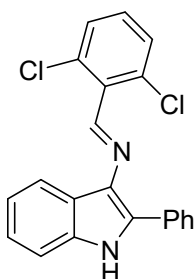

**3an**

**(E)-N-(2,6-Dichlorobenzylidene)-2-phenyl-1H-indol-3-amine (3an)**, a yellow oil, 0.092 g, 84% yield.  $^1\text{H}$  NMR (400 MHz,  $\text{CDCl}_3$ ):  $\delta$  9.33 (s, 1H), 8.37 (brs, 1H), 8.05–8.03 (m, 1H), 7.92 (d,  $J = 7.2$  Hz, 2H), 7.37–7.24 (m, 6H), 7.21–7.19 (m, 2H), 7.15 (t,  $J = 8.0$  Hz, 1H).  $^{13}\text{C}$  NMR (100 MHz,  $\text{CDCl}_3$ ):  $\delta$  152.2, 135.4, 134.8, 133.9, 133.4, 131.1, 129.7, 128.9, 128.4, 128.2, 127.9, 125.4, 123.1, 121.5, 121.4, 119.8, 111.5. IR (thin film) 3573, 3412, 3058, 1639, 1579, 1555, 738, 691  $\text{cm}^{-1}$ ; HRMS (ESI)  $m/z$  calcd for  $\text{C}_{21}\text{H}_{15}\text{Cl}_2\text{N}_2$   $[\text{M}+\text{H}]^+$ : 365.0607, found: 365.0607.

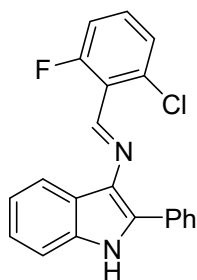

**3ao**

**(E)-N-(2-Chloro-6-fluorobenzylidene)-2-phenyl-1H-indol-3-amine (3ao)**, a yellow solid, 0.082 g, 88% yield. Mp: 144–145 °C; <sup>1</sup>H NMR (400 MHz, CDCl<sub>3</sub>): δ 9.41 (s, 1H), 8.34 (brs, 1H), 8.02 (d, *J* = 7.2 Hz, 3H), 7.48 (t, *J* = 7.6 Hz, 2H), 7.39–7.32 (m, 2H), 7.25–7.22 (m, 4H), 7.16–7.07 (m, 1H). <sup>13</sup>C NMR (100 MHz, CDCl<sub>3</sub>): δ 162.7 (d, *J* = 258.2 Hz), 150.0 (d, *J* = 2.9 Hz), 135.5, 135.4, 135.3, 133.6, 131.3, 130.4 (d, *J* = 9.5 Hz), 128.6, 128.0, 126.1, 125.8 (d, *J* = 3.7 Hz), 124.1 (d, *J* = 11.6 Hz), 123.2, 121.5, 121.4, 119.9, 111.4 (d, *J* = 22.6 Hz), 111.5. IR (thin film) 3432, 3316, 1662, 1600, 900, 739, 691 cm<sup>-1</sup>; HRMS (ESI) *m/z* calcd for C<sub>21</sub>H<sub>15</sub>ClFN<sub>2</sub> [M+H]<sup>+</sup>: 349.0902, found: 349.0902.

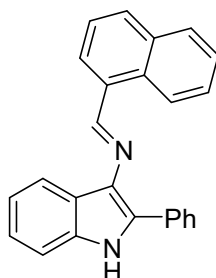

**3ap**

**(E)-N-(Naphthalen-1-ylmethylene)-2-phenyl-1H-indol-3-amine (3ap)**, a yellow solid, 0.086 g, 83% yield. Mp: 196–197 °C; <sup>1</sup>H NMR (400 MHz, CDCl<sub>3</sub>): δ 9.79 (s, 1H), 9.09 (d, *J* = 6.4 Hz, 1H), 8.26 (s, 1H), 8.18 (d, *J* = 5.6 Hz, 1H), 8.03 (d, *J* = 6.0 Hz, 1H), 7.97 (d, *J* = 6.0 Hz, 2H), 7.92–7.90 (m, 2H), 7.59–7.52 (m, 3H), 7.47 (t, *J* = 6.0 Hz, 2H), 7.40 (d, *J* = 5.6 Hz, 1H), 7.35 (t, *J* = 6.0 Hz, 1H), 7.28–7.22 (m, 2H). <sup>13</sup>C NMR (100 MHz, CDCl<sub>3</sub>): δ 156.2, 135.6, 134.0, 132.8, 132.0, 131.9, 131.4, 130.7, 128.7, 128.6, 128.2, 128.0, 127.7, 127.0, 126.8, 126.0, 125.5, 124.4, 123.1, 122.0, 121.1, 119.8, 111.6. IR (thin film) 3537, 3434, 3053, 1638, 1580, 1528, 774, 684 cm<sup>-1</sup>; HRMS (ESI) *m/z* calcd for C<sub>25</sub>H<sub>19</sub>N<sub>2</sub> [M+H]<sup>+</sup>: 347.1543, found: 347.1571.

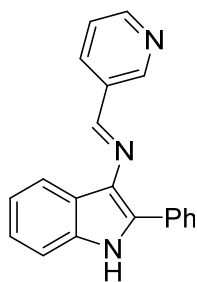

**3aq**

**(E)-2-Phenyl-N-(pyridin-3-ylmethylene)-1H-indol-3-amine (3aq)**, a yellow solid, 0.046 g, 51% yield. Mp: 240–241 °C;  $^1\text{H}$  NMR (400 MHz,  $\text{DMSO-}d_6$ ):  $\delta$  11.77 (s, 1H), 9.25 (s, 1H), 9.14 (s, 1H), 8.63 (d,  $J = 7.6$  Hz, 1H), 8.34 (d,  $J = 7.6$  Hz, 1H), 8.13 (d,  $J = 7.4$  Hz, 3H), 7.56–7.47 (m, 4H), 7.41 (t,  $J = 7.2$  Hz, 1H), 7.25 (d,  $J = 7.2$  Hz, 1H), 7.18 (t,  $J = 7.2$  Hz, 1H).  $^{13}\text{C}$  NMR (100 MHz,  $\text{DMSO-}d_6$ ):  $\delta$  151.9, 150.9, 150.0, 136.2, 134.3, 134.2, 134.0, 132.2, 128.9, 128.8, 128.1, 124.7, 124.1, 123.3, 121.2, 121.1, 120.6, 112.5. IR (thin film) 3573, 3435, 3028, 1639, 1603, 1568, 801, 732  $\text{cm}^{-1}$ ; HRMS (ESI)  $m/z$  calcd for  $\text{C}_{20}\text{H}_{16}\text{N}_3$   $[\text{M}+\text{H}]^+$ : 298.1339, found: 298.1335.

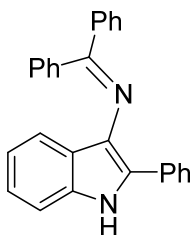

**3ar**

**N-(Diphenylmethylene)-2-phenyl-1H-indol-3-amine (3ar)**, a yellow oil, 0.061 g, 55% yield.  $^1\text{H}$  NMR (400 MHz,  $\text{CDCl}_3$ ):  $\delta$  7.92 (brs, 1H), 7.86 (d,  $J = 7.6$  Hz, 2H), 7.55 (d,  $J = 7.6$  Hz, 2H), 7.50–7.47 (m, 1H), 7.44 (t,  $J = 7.2$  Hz, 2H), 7.32–7.29 (m, 2H), 7.23–7.18 (m, 3H), 7.09–6.97 (m, 6H), 6.91 (t,  $J = 7.2$  Hz, 1H).  $^{13}\text{C}$  NMR (100 MHz,  $\text{CDCl}_3$ ):  $\delta$  169.3, 139.9, 137.2, 135.1, 132.3, 130.4, 129.4, 128.7, 128.6, 128.4, 128.0, 127.5, 127.3, 126.5, 126.1, 124.7, 122.7, 122.5, 119.4, 119.1, 110.6. IR (thin film) 3434, 3057, 1651, 1621, 1598, 802, 695  $\text{cm}^{-1}$ ; HRMS (ESI)  $m/z$  calcd for  $\text{C}_{27}\text{H}_{21}\text{N}_2$   $[\text{M}+\text{H}]^+$ : 373.1699, found: 373.1695.



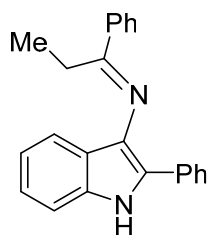

**3as**

**(E)-1-Phenyl-N-(2-phenyl-1H-indol-3-yl)propan-1-imine (3as)**, a yellow oil, 0.050 g, 52% yield.  $^1\text{H}$  NMR (400 MHz,  $\text{CDCl}_3$ ):  $\delta$  8.13 (brs, 1H), 8.10–8.05 (m, 2H), 7.64 (d,  $J = 7.6$  Hz, 2H), 7.51–7.47 (m, 3H), 7.36–7.31 (m, 4H), 7.24–7.19 (m, 2H), 7.10–7.06 (m, 1H), 2.73 (q,  $J = 7.6$  Hz, 2H), 0.88 (t,  $J = 7.6$  Hz, 3H).  $^{13}\text{C}$  NMR (100 MHz,  $\text{CDCl}_3$ ):  $\delta$  174.0, 138.3, 135.4, 132.3, 130.2, 128.7, 128.4, 127.7, 126.4, 126.3, 125.7, 123.0, 122.9, 122.8, 119.7, 118.7, 110.9, 24.5, 11.7. IR (thin film) 3475, 3057, 2992, 1651, 1621, 1598, 802, 758, 695  $\text{cm}^{-1}$ ; HRMS (ESI)  $m/z$  calcd for  $\text{C}_{23}\text{H}_{21}\text{N}_2$   $[\text{M}+\text{H}]^+$ : 325.1700, found: 325.1695.

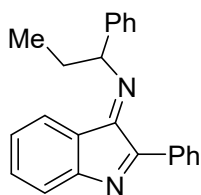

**4as**

**(E)-2-Phenyl-N-(1-phenylpropyl)-3H-indol-3-imine (4as)**, a yellow oil, 0.013 g, 13% yield.  $^1\text{H}$  NMR (400 MHz,  $\text{CDCl}_3$ ):  $\delta$  8.44–8.42 (m, 2H), 7.80 (d,  $J = 7.2$  Hz, 1H), 7.53 (d,  $J = 7.6$  Hz, 1H), 7.49–7.45 (m, 5H), 7.44–7.40 (m, 1H), 7.37–7.33 (m, 2H), 7.27–7.19 (m, 2H), 5.45 (t,  $J = 6.8$  Hz, 1H), 2.13 (dd,  $J = 7.2$  Hz, 14 Hz, 2H), 0.97 (t,  $J = 7.2$  Hz, 3H).  $^{13}\text{C}$  NMR (100 MHz,  $\text{CDCl}_3$ ):  $\delta$  167.1, 163.1, 157.9, 143.2, 132.7, 132.5, 130.7, 130.4, 128.5, 128.1, 127.2, 127.0, 126.9, 126.2, 122.3, 121.7, 68.6, 32.7, 10.8. IR (thin film) 3474, 3042, 2980, 1650, 1623, 1594, 801, 757, 694  $\text{cm}^{-1}$ ; HRMS (ESI)  $m/z$  calcd for  $\text{C}_{23}\text{H}_{21}\text{N}_2$   $[\text{M}+\text{H}]^+$ : 325.1700, found: 325.1696.

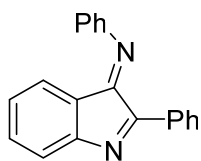

**4at**

**(E)-N,2-Diphenyl-3H-indol-3-imine (4at)**, a yellow solid, 0.010 g, 12% yield. Mp: 140–141 °C. <sup>1</sup>H NMR (400 MHz, CDCl<sub>3</sub>): δ 8.44 (d, *J* = 6.4 Hz, 2H), 7.50–7.43 (m, 6H), 7.37–7.34 (m, 1H), 7.28–7.25 (m, 1H), 7.01 (d, *J* = 7.6 Hz, 2H), 6.92 (t, *J* = 7.6 Hz, 1H), 6.56 (d, *J* = 7.6 Hz, 1H). <sup>13</sup>C NMR (100 MHz, CDCl<sub>3</sub>): δ 166.5, 164.2, 157.8, 150.3, 133.2, 132.1, 131.0, 130.0, 129.3, 128.3, 126.8, 125.8, 125.2, 121.6, 121.5, 117.5. IR (thin film) 3057, 3043, 1642, 1625, 1596, 803, 753 cm<sup>-1</sup>; HRMS (ESI) *m/z* calcd for C<sub>20</sub>H<sub>15</sub>N<sub>2</sub> [M+H]<sup>+</sup>: 283.1230, found: 283.1221.

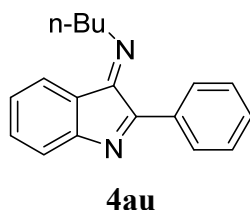

**(E)-N-Butyl-2-phenyl-3H-indol-3-imine (4au)**, a yellow oil, 0.010 g, 12% yield; <sup>1</sup>H NMR (400 MHz, CDCl<sub>3</sub>): δ 8.36 (d, *J* = 6.4 Hz, 2H), 7.75 (d, *J* = 7.6 Hz, 1H), 7.55 (d, *J* = 7.2 Hz, 1H), 7.46–7.45 (m, 4H), 7.27–7.23 (m, 1H), 4.20 (t, *J* = 6.8 Hz, 2H), 2.01–1.92 (m, 2H), 1.61–1.55 (m, 2H), 1.05 (t, *J* = 7.2 Hz, 3H). <sup>13</sup>C NMR (100 MHz, CDCl<sub>3</sub>): δ 164.5, 157.5, 132.5, 132.4, 130.7, 130.2, 128.2, 127.0, 126.4, 122.5, 121.6, 54.6, 33.1, 20.9, 14.0. IR (thin film) 3468, 2958, 1529, 1489, 1260, 1028, 761, 691 cm<sup>-1</sup>; HRMS (ESI) *m/z* calcd for C<sub>18</sub>H<sub>18</sub>N<sub>2</sub> [M+H]<sup>+</sup>: 263.1543, found: 263.1542.

### 3. Synthesis of compounds 5a, 6, 7 and 8

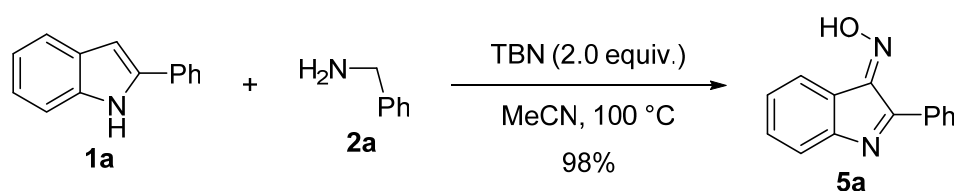

In a dried Teflon-sealed reaction flask equipped with a stir bar was charged with 2-phenylindoles **1a** (0.058 g, 0.3 mmol), TBN (0.062 g, 0.6 mmol), MeCN (3.0 mL). The reaction mixture was stirred at 100 °C for 0.5 h until **1a** was consumed completely (monitored by TLC). At this time, the reaction mixture was cooled to room temperature, filtered and washed with DCM. The corresponding oxime **5a** was obtained as a yellow solid (0.065 g, 98%).<sup>[1]</sup> Mp: 274–275 °C; <sup>1</sup>H NMR (400 MHz, DMSO-*d*<sub>6</sub>): δ 14.27 (brs, 1H), 8.69 (d, *J* = 6.4 Hz, 2H), 8.55 (d, *J* = 7.8 Hz, 1H), 8.00–7.89 (m, 5H), 7.77–7.73 (m, 1H); <sup>13</sup>C NMR (100 MHz, DMSO-*d*<sub>6</sub>): δ 154.6,

154.5, 132.4, 131.6, 131.2, 130.3, 130.2, 130.1, 129.8, 128.8, 128.5, 127.6; IR (thin film) 3434, 3049, 1840, 1593, 1492, 1272, 1204, 1027, 753  $\text{cm}^{-1}$ ; HRMS (ESI)  $m/z$  calcd for  $\text{C}_{14}\text{H}_{11}\text{N}_2\text{O}$   $[\text{M}+\text{H}]^+$ : 223.0866, found: 223.0865.

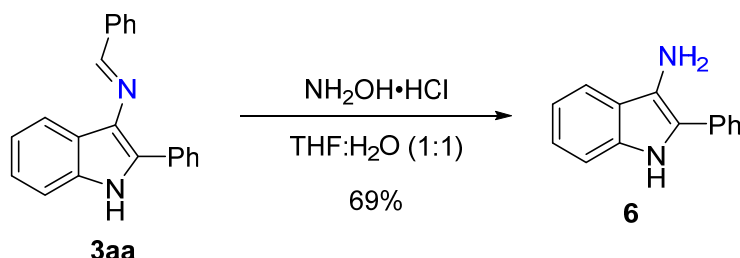

In a 25 mL reaction flask was charged with **3aa** (0.148 g, 0.5 mmol),  $\text{NH}_2\text{OH}\cdot\text{HCl}$  (0.078 g, 1.5 equiv.), and THF:  $\text{H}_2\text{O}$  (1:1, 5 mL). The reaction mixture was stirred at room temperature 1.0 h until **3aa** was consumed completely (monitored by TLC). Then, water (10 mL) was added and the resulting mixture was extracted with ethylacetate ( $3 \times 10$  mL). The combined organic phase was dried over anhydrous  $\text{Na}_2\text{SO}_4$ . The solvent was removed under reduced pressure and the crude product was purified by flash column chromatography (1/10 to 1/2, ethyl acetate/petroleum ether) to afford 3-aminoindole **6** as a purple solid (0.072 g, 69%).<sup>[2]</sup> Mp: 110–111  $^\circ\text{C}$ ;  $^1\text{H}$  NMR (400 MHz,  $\text{DMSO}-d_6$ ):  $\delta$  10.49 (s, 1H), 7.81 (d,  $J = 8.0$  Hz, 2H), 7.68 (d,  $J = 8.0$  Hz, 1H), 7.45 (t,  $J = 7.6$  Hz, 2H), 7.26 (d,  $J = 8.0$  Hz, 1H), 7.21 (t,  $J = 7.6$  Hz, 1H), 7.07 (t,  $J = 7.2$  Hz, 1H), 6.93 (t,  $J = 7.2$  Hz, 1H), 4.48 (s, 2H).  $^{13}\text{C}$  NMR (100 MHz,  $\text{DMSO}-d_6$ ):  $\delta$  134.9, 133.5, 128.6, 125.0, 124.9, 122.9, 122.8, 121.9, 118.8, 118.2, 117.3, 110.7; IR (thin film) 3400, 3051, 2845, 2830, 1610, 1375, 802, 694  $\text{cm}^{-1}$ ; HRMS (ESI)  $m/z$  calcd for  $\text{C}_{14}\text{H}_{13}\text{N}_2$   $[\text{M}+\text{H}]^+$ : 209.1073, found: 209.1064.

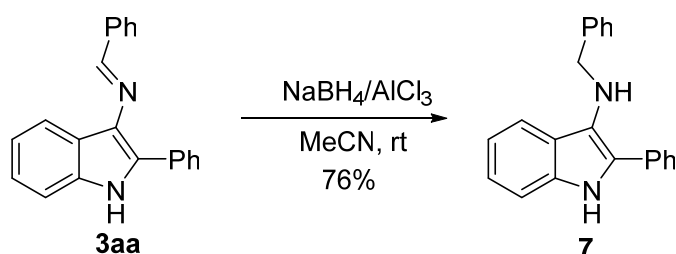

In a 25 mL reaction flask was charged with **3aa** (0.148 g, 0.5 mmol), MeCN (5 mL),  $\text{NaBH}_4$  (0.078g, 1.5 equiv.) was added at 0  $^\circ\text{C}$  and stirred for 10 minutes, and then  $\text{AlCl}_3$  (0.078g, 1.5 equiv.) was added. The reaction mixture was stirred at room



119.9, 111.5. IR (thin film) 3573, 3394, 3056, 1641, 1619, 1573, 778, 748  $\text{cm}^{-1}$ ;  
HRMS (ESI)  $m/z$  calcd for  $\text{C}_{36}\text{H}_{27}\text{N}_4$   $[\text{M}+\text{H}]^+$ : 515.2230, found: 515.2219.

#### 4. Gram scale preparation of 3aa

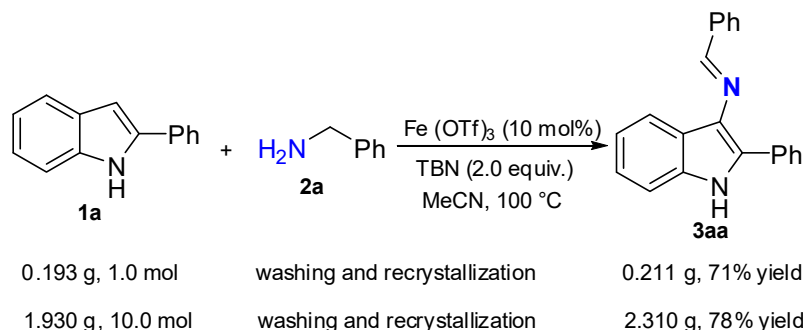

For an example (10 mmol of **1a**): In a dry 250 mL round-bottom flask equipped with a magnetic stir bar was charged with the corresponding indole **1a** (1.93 g, 10 mmol), **2a** (3.14 g, 20 mmol, 2.0 equiv.),  $\text{Fe}(\text{OTf})_3$  (0.502 g, 10 mol%), and TBN (2.06 g, 20 mmol, 2.0 equiv.). Then, MeCN (100 mL) was added. The mixture was stirred at 100 °C for 30 h (monitored by TLC). At this time, the solvent was removed under reduced pressure. The residue was added with water (50 mL) and extracted by EtOAc (3  $\times$  50 mL). The combined organic phase was dried with anhydrous  $\text{Na}_2\text{SO}_4$ . The solvent was removed under reduced pressure, and the crude product was recrystallized with EtOH to afford 3-aminoindole **3aa** (2.310 g, 78%) as a yellow solid.

#### 5. General procedure for synthesis of 2-arylindoles **1**

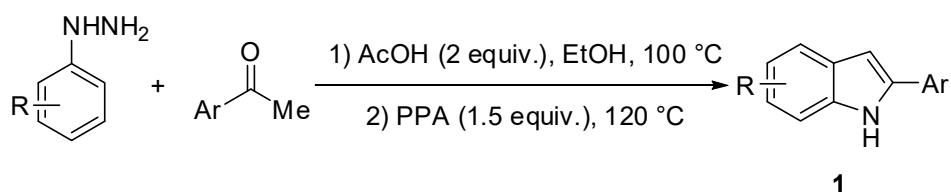

**Procedure B:** A mixture of acetophenone (10 mmol), phenylhydrazine (1.2 equiv), HOAc (20 mmol) and EtOH (6.0 mL) were taken in a 100 mL round bottom flask. Then, the reaction mixture was refluxed at 100 °C. When the reaction was completed (detected by TLC), it was cooled to room temperature. The EtOH was evaporated in vacuo, and then recrystallized with EtOAc and hexane. Next, freshly prepared phenylhydrazone (10 mmol) were taken in a 100 mL round bottom flask and 1.5 equiv. of polyphosphoric acid (PPA) was added at one time and the solution was

refluxed. After completion, the reaction mixture was cooled to room temperature, quenched with cold H<sub>2</sub>O (10 mL) and extracted with EtOAc (3 × 10 mL). The combined organic layers were dried over anhydrous Na<sub>2</sub>SO<sub>4</sub> and then evaporated in vacuo. The residue was purified by column chromatography on silica gel with ethyl acetate/hexane as the eluent to afford the corresponding 2-arylindoles **1**.

Indoles (**1a-1m**)<sup>[3]</sup>, (**1n-1v**)<sup>[4]</sup>, (**1w, 1z, 1aa-1ac**)<sup>[5]</sup>, (**1j, 1ad**)<sup>[6]</sup> and (**1x-1y**)<sup>[7]</sup> were prepared according to literature methods and their spectra data matched literature values.

## 6. Description of Hammett study experiments

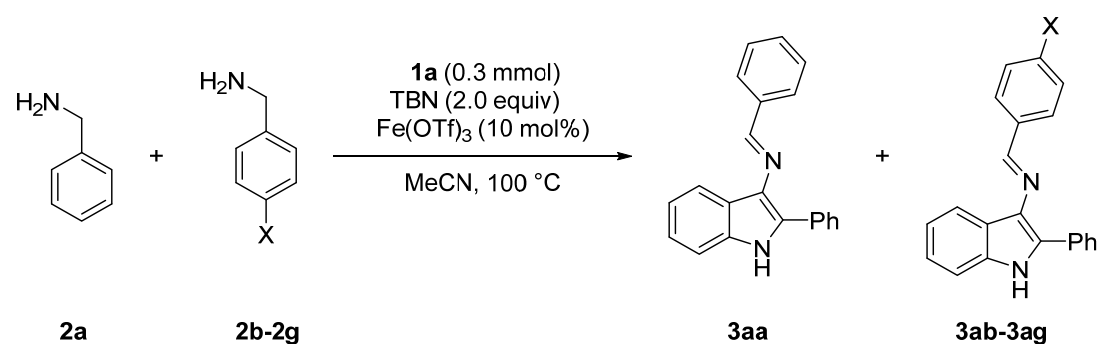

Competition experiments were set up using general procedure A, a 1:1 mixture of 1.0 equiv of **2a** and 1.0 equiv of **2b**, **2c**, **2d**, **2f**, or **2g**. The transformations were then monitored by <sup>1</sup>H NMR spectroscopy and run to 10% conversion. At this time, the ratio of the N-H of 3-aminoindole **3** resonances was recorded as an indication of the relative initial rates of the two substrates. The results were then plotted against Hammett parameters as illustrated in Figure.<sup>[8]</sup>

| <b>2</b>  | X                         | $\sigma_p$ | $\sigma_m$ | $k_X/k_H$ | $\log(k_X/k_H)$ |
|-----------|---------------------------|------------|------------|-----------|-----------------|
| <b>2b</b> | <i>p</i> -OMe             | -0.27      | 0.12       | 0.650     | -0.187          |
| <b>2c</b> | <i>p</i> -Me              | -0.17      | -0.07      | 0.697     | -0.157          |
| <b>2a</b> | <i>p</i> -H               | 0          | 0          | 1.00      | 0               |
| <b>2f</b> | <i>p</i> -F               | 0.06       | 0.34       | 1.028     | 0.012           |
| <b>2d</b> | <i>p</i> -Cl              | 0.23       | 0.37       | 1.28      | 0.107           |
| <b>2g</b> | <i>p</i> -CF <sub>3</sub> | 0.54       | 0.43       | 1.83      | 0.262           |

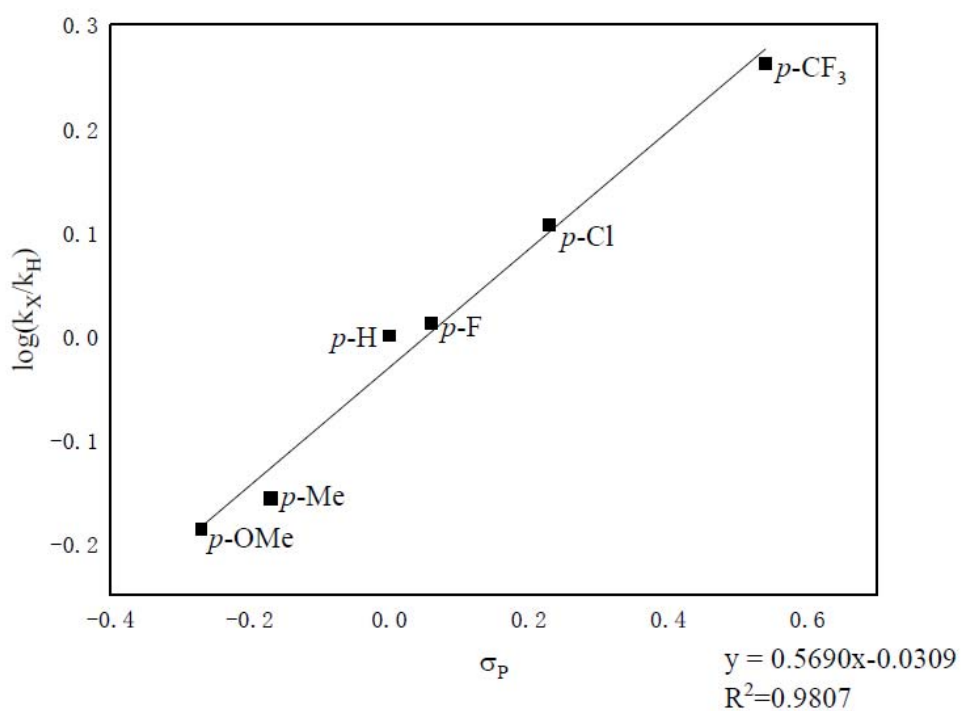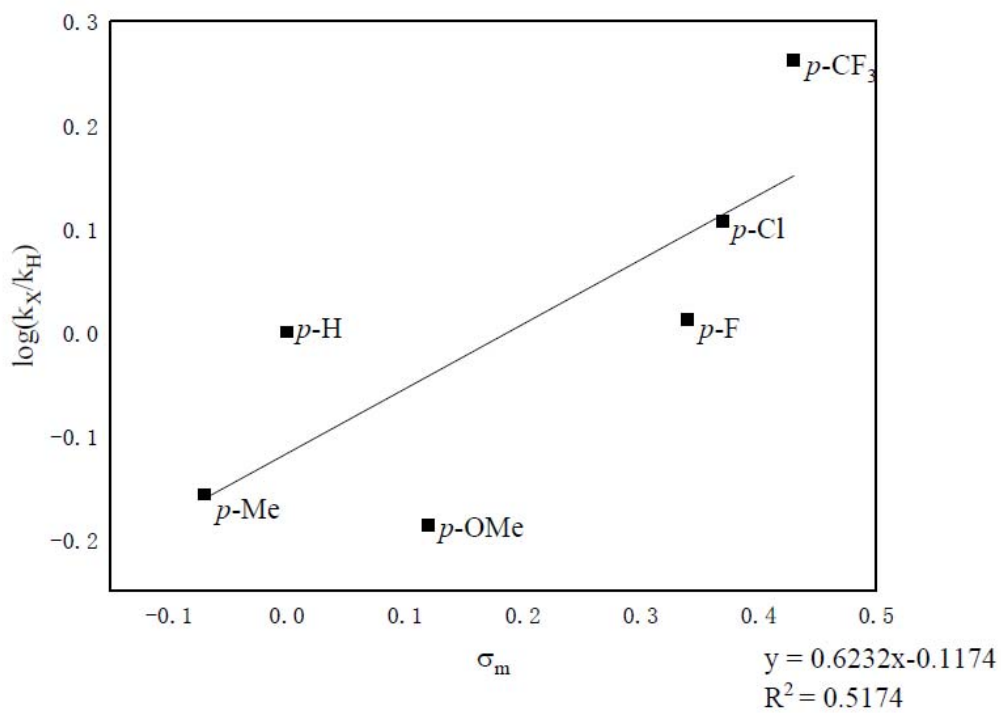

## 7. Comparison of green metrics

To show the green metrics, we compared two pathways to prepare 3-amino indole **3aa**.

1) Lindsay and Sperry's work, *Org. Biomol. Chem.* 2021, 19, 7903

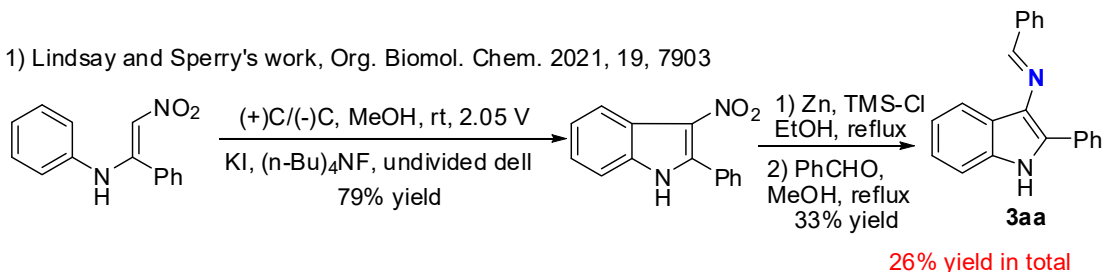

2) This work, one step

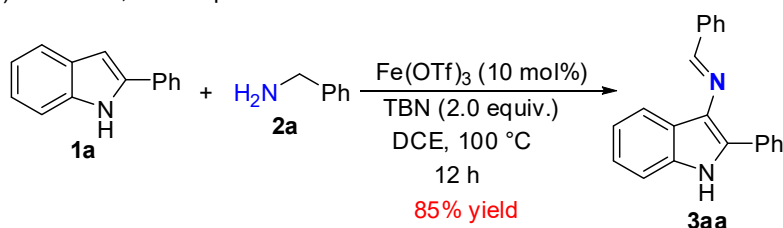

| Entry             | substrate <b>1</b> |                                    |                                          |                      |                         |                         | <b>3aa</b> ,<br>Yield |
|-------------------|--------------------|------------------------------------|------------------------------------------|----------------------|-------------------------|-------------------------|-----------------------|
| Lindsay's<br>work | 0.15 mmol          | KI<br>(0.03<br>mmol)               | (n-Bu) <sub>4</sub> NF<br>(1.01<br>mmol) | Zn<br>(1.56<br>mmol) | TMSCl<br>(2.36<br>mmol) | PhCHO<br>(0.98<br>mmol) | 26%                   |
| This work         | 0.3 mmol           | BnNH <sub>2</sub><br>(0.6<br>mmol) | Fe(OTf) <sub>3</sub><br>(0.03<br>mmol)   | TBN<br>(0.6<br>mmol) | -                       |                         | 85%                   |

$$\begin{aligned}
 \text{AE} &= \frac{\text{molecular mass of desired product}}{\text{molecular mass of all reactants}} \times 100\% \\
 &= \frac{296 \times 0.15}{240 \times 0.15 + 165 \times 0.03 + 261 \times 1.01 + 64 \times 1.56 + 108 \times 2.36 + 106 \times 0.98} \times 100\% = 0.06\% \\
 &= \frac{296 \times 0.3}{193 \times 0.3 + 107 \times 0.6 + 502 \times 0.03 + 103 \times 0.6} \times 100\% = \mathbf{45\%}
 \end{aligned}$$

Therefore, compared with the existing procedure, the present reaction has 900-fold increase in atom economy for the preparation of **3aa**.



---

### Lindsay and sperry' s work

| Parameter                      | Detail of parameters                                                                     |
|--------------------------------|------------------------------------------------------------------------------------------|
| 1. Yield                       | 26% in two steps                                                                         |
| 2. Cost of reactants to obtain | 0.15 mmol of product<br>nitroalkene<br>KI<br>nBu <sub>4</sub> NF<br>Zn<br>TMSCl<br>PhCHO |
| 3. Safety                      | MeOH, EtOH                                                                               |
| 4. Technical setup             | Common setup                                                                             |
| 5. Temperature/time            | Heating 7 h +3 h + 1 h = 11 h                                                            |
| 6. Workup and purification     | Classical chromatography                                                                 |

### This work

| Parameter                      | Detail of parameters                                                                                   |
|--------------------------------|--------------------------------------------------------------------------------------------------------|
| 1. Yield                       | 85% in one step                                                                                        |
| 2. Cost of reactants to obtain | 0.3 mmol of product<br>indole<br>TBN<br>Fe(OTf) <sub>3</sub><br>Benzylamine                            |
| 3. Safety                      | DCE                                                                                                    |
| 4. Technical setup             | Common setup                                                                                           |
| 5. Temperature/time            | heating, 12 h                                                                                          |
| 6. Workup and purification     | Simple extraction and recrystallization for 1 mmol or 10 mmol<br>Classical chromatography (< 1.0 mmol) |

## 8. References

- [1] W.-L. Chen, S.-Y. Wu, X.-L. Mo, L.-X. Wei, C. Liang and D.-L. Mo, *Org. Lett.* 2018, **20**, 3527.
- [2] L. H. Leijendekker, J. Weweler, T. M. Leuther and J. Streuff, *Angew. Chem. Int. Ed.* 2017, **56**, 6103.
- [3] X. H. Hong, Q. T. Tan, B. X. Liu and B. Xu, *Angew. Chem. Int. Ed.* 2017, **56**, 3961.
- [4] L. J. Wu, G. B. Deng and Y. Liang, *Org. Biomol. Chem.* 2017, **15**, 6808.
- [5] S. K. Bhunia, A. Polley, R. Natarajan and R. Jana, *Chem. Eur. J.* 2015, **21**, 16786.

[6] H. Chung, J. Kim, G. A. González-Montiel, P. H-Y. Cheong and H. G. Lee, *Org. Lett.* 2021, **23**, 1096.

[7] X. H. Shan, H. X. Zheng, B. Yang, L. Tie, J. L. Fu, J. P. Qu and Y.-B. Kang, *Nat. Commun.* 2019, **10**, 908.

[8] C. Hansch, A. Leo and R. W. Taft, *Chem. Rev.* 1991, **91**, 165.

### 9. X-ray structures for compounds 3ra and 4at

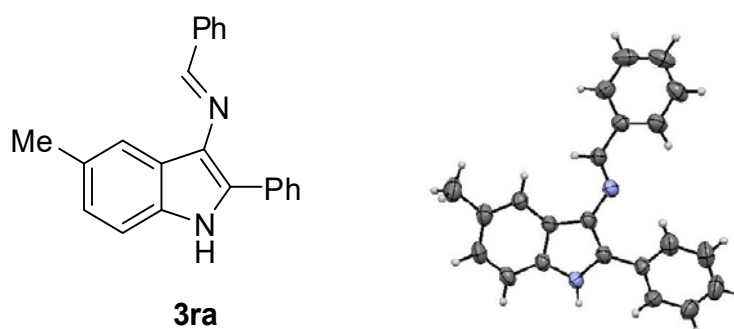

**Figure S1:** ORTEP diagram of **3ra** at 50% ellipsoid probability.

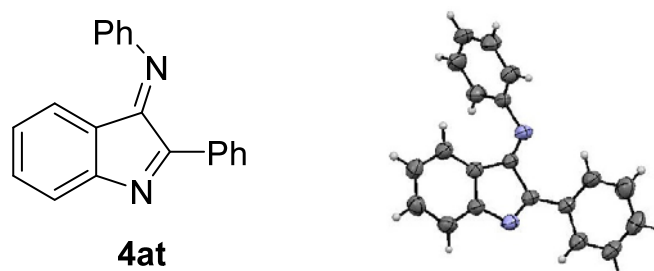

**Figure S2:** ORTEP diagram of **4at** at 50% ellipsoid probability.

### 10. NMR spectra for compounds 3, 4, 5a, 6, 7 and 8

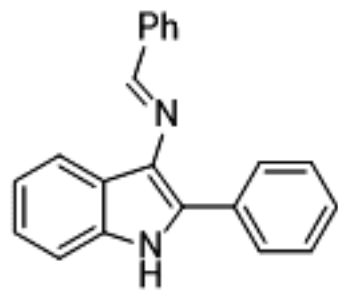

3aa

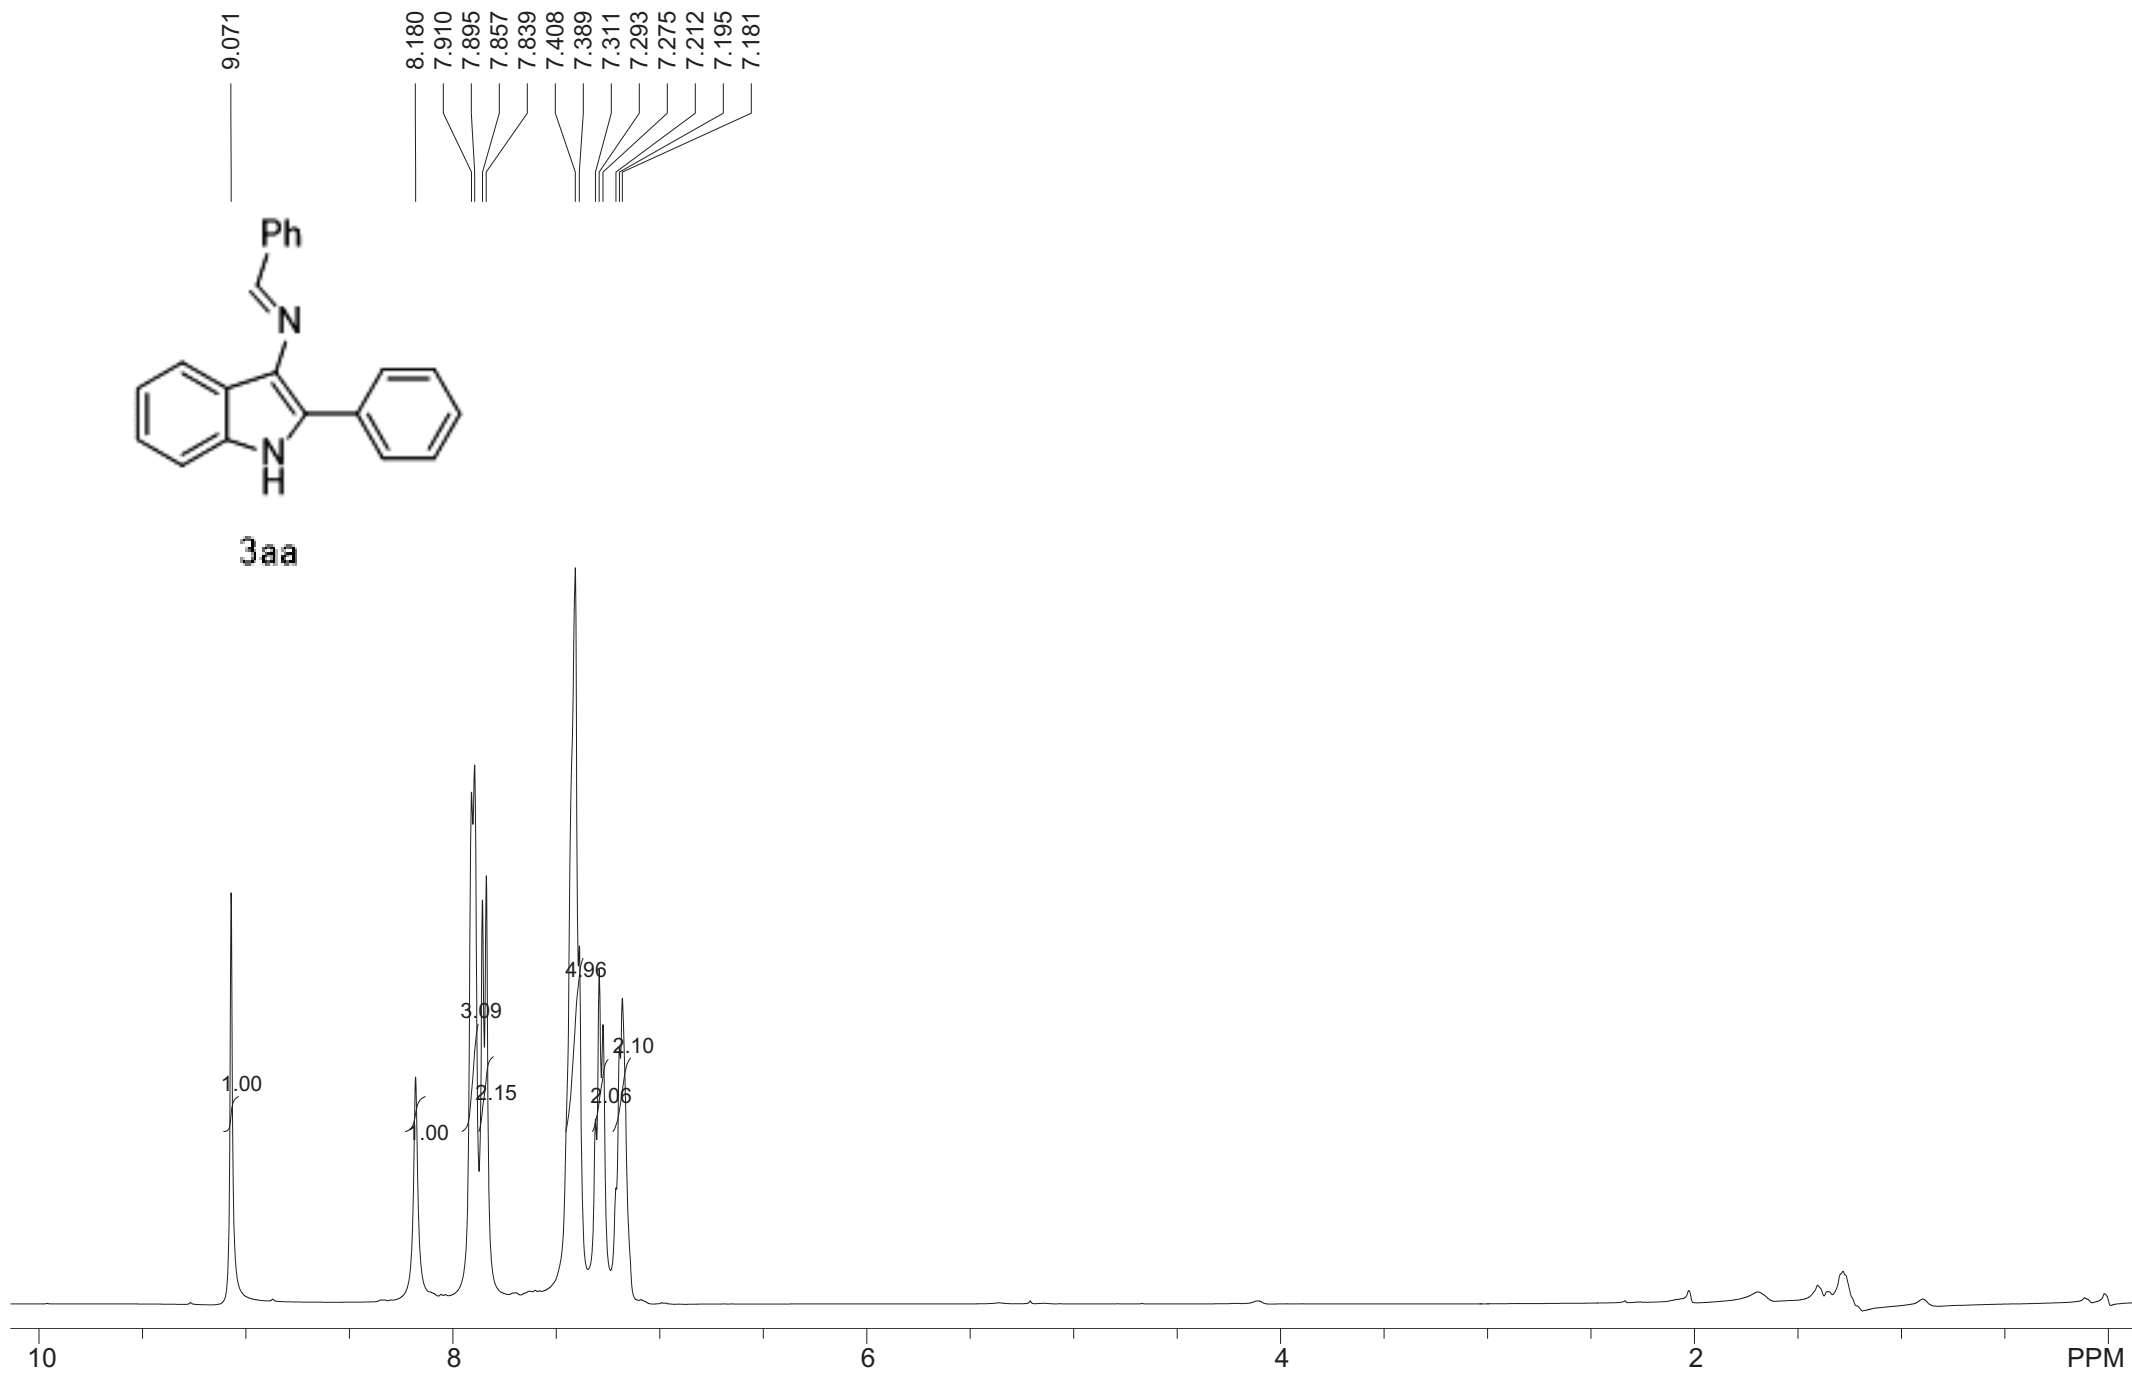

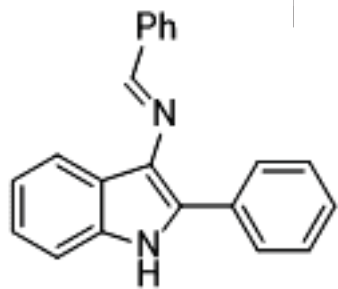

3aa

156.521

137.687  
135.390  
131.934  
131.642  
130.148  
128.624  
128.507  
127.917  
127.515  
125.780  
122.958  
121.916  
120.851  
119.721  
111.511

77.314  
77.000  
76.679

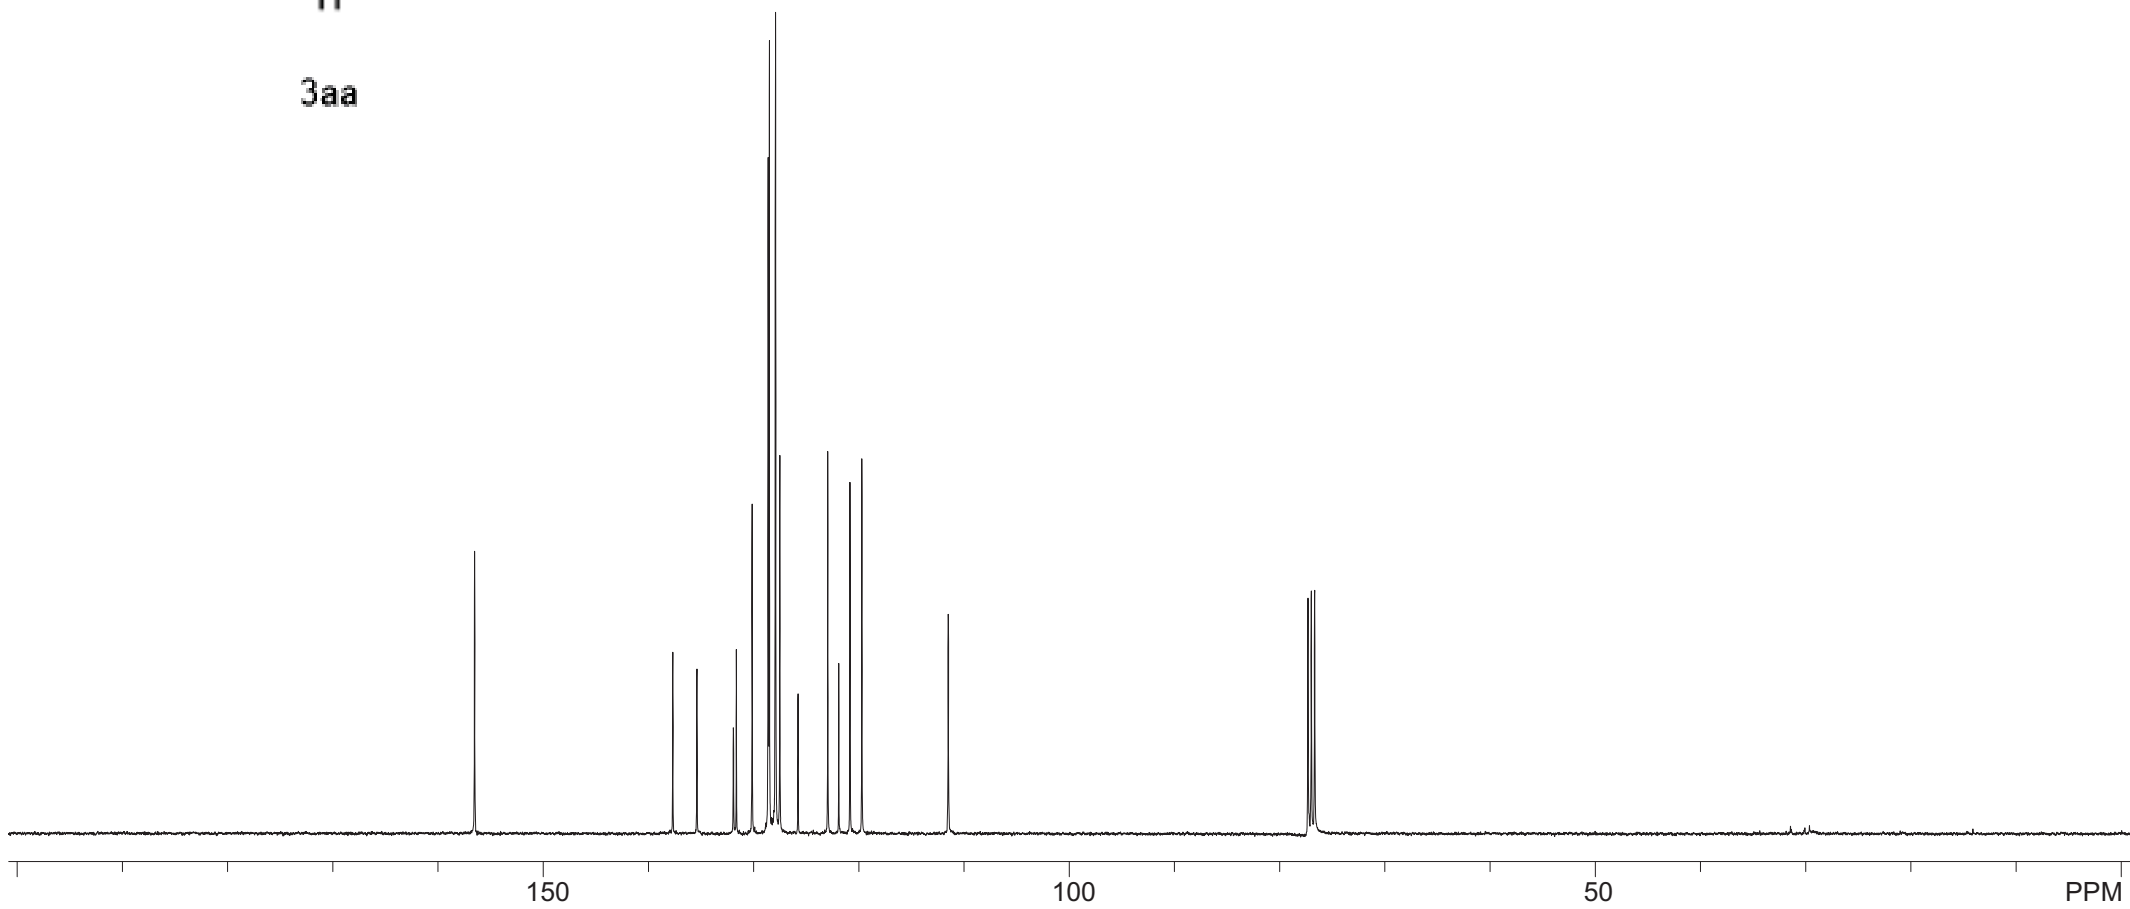

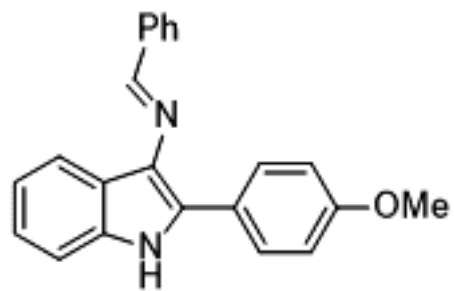

**3ba**

9.119  
 8.187  
 7.934  
 7.917  
 7.866  
 7.845  
 7.477  
 7.461  
 7.443  
 7.432  
 7.414  
 7.354  
 7.336  
 7.232  
 7.212  
 7.196  
 7.179  
 7.161  
 7.001  
 6.980

3.839

-0.000

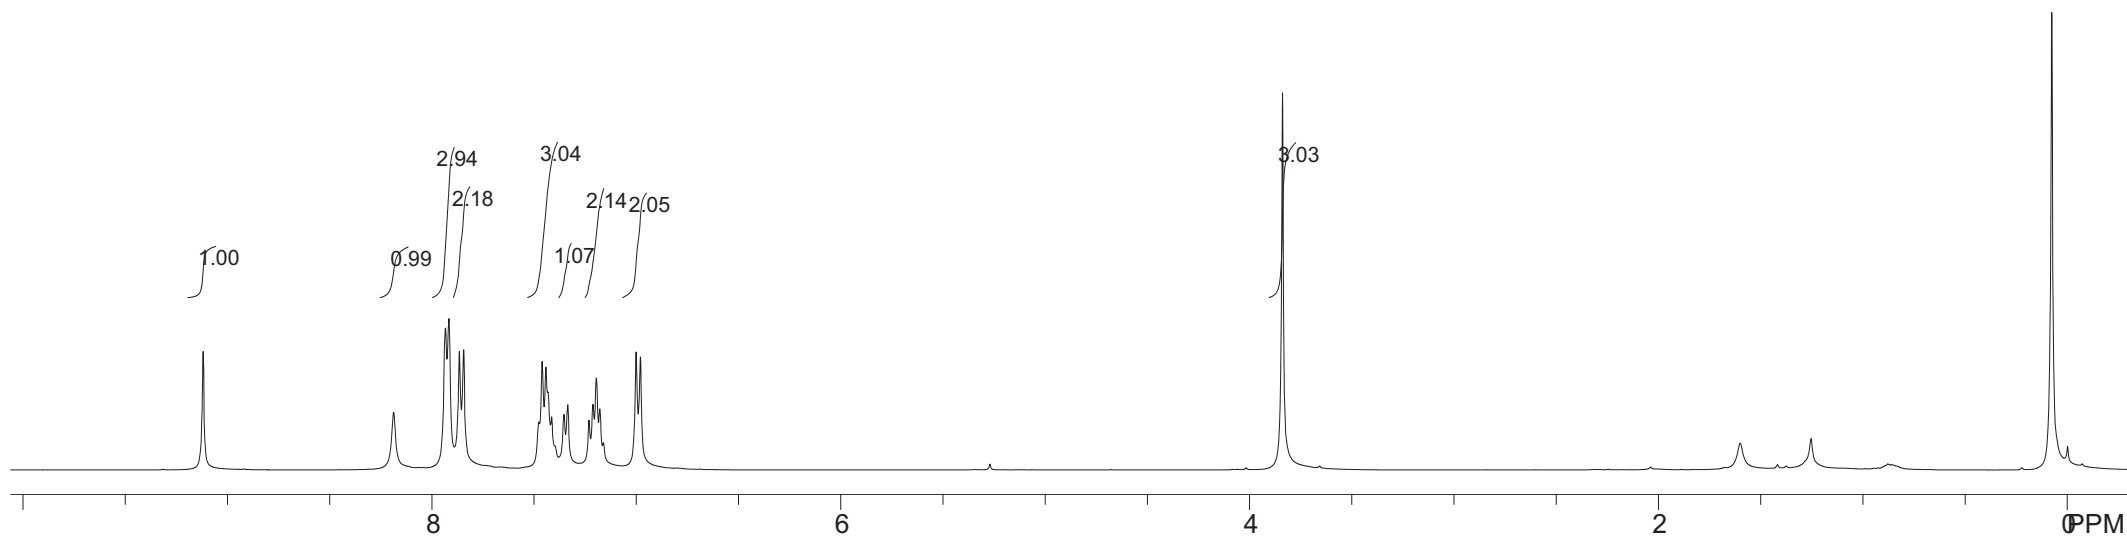

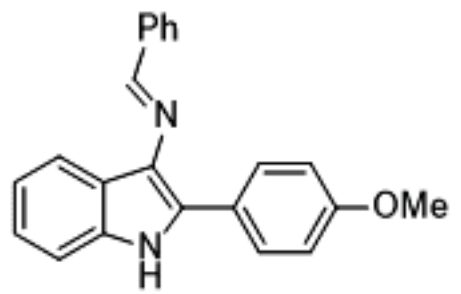

3ba

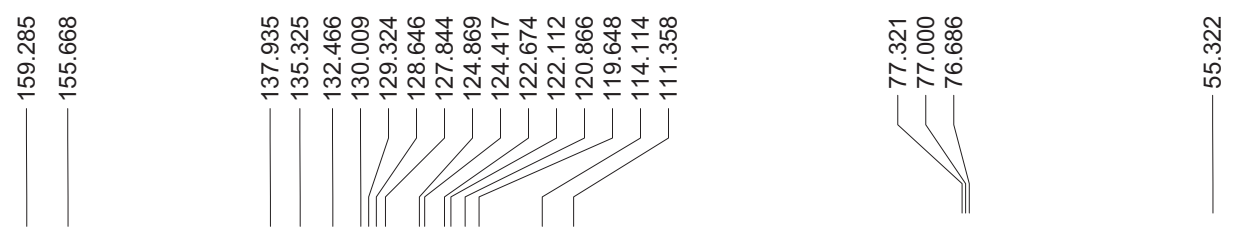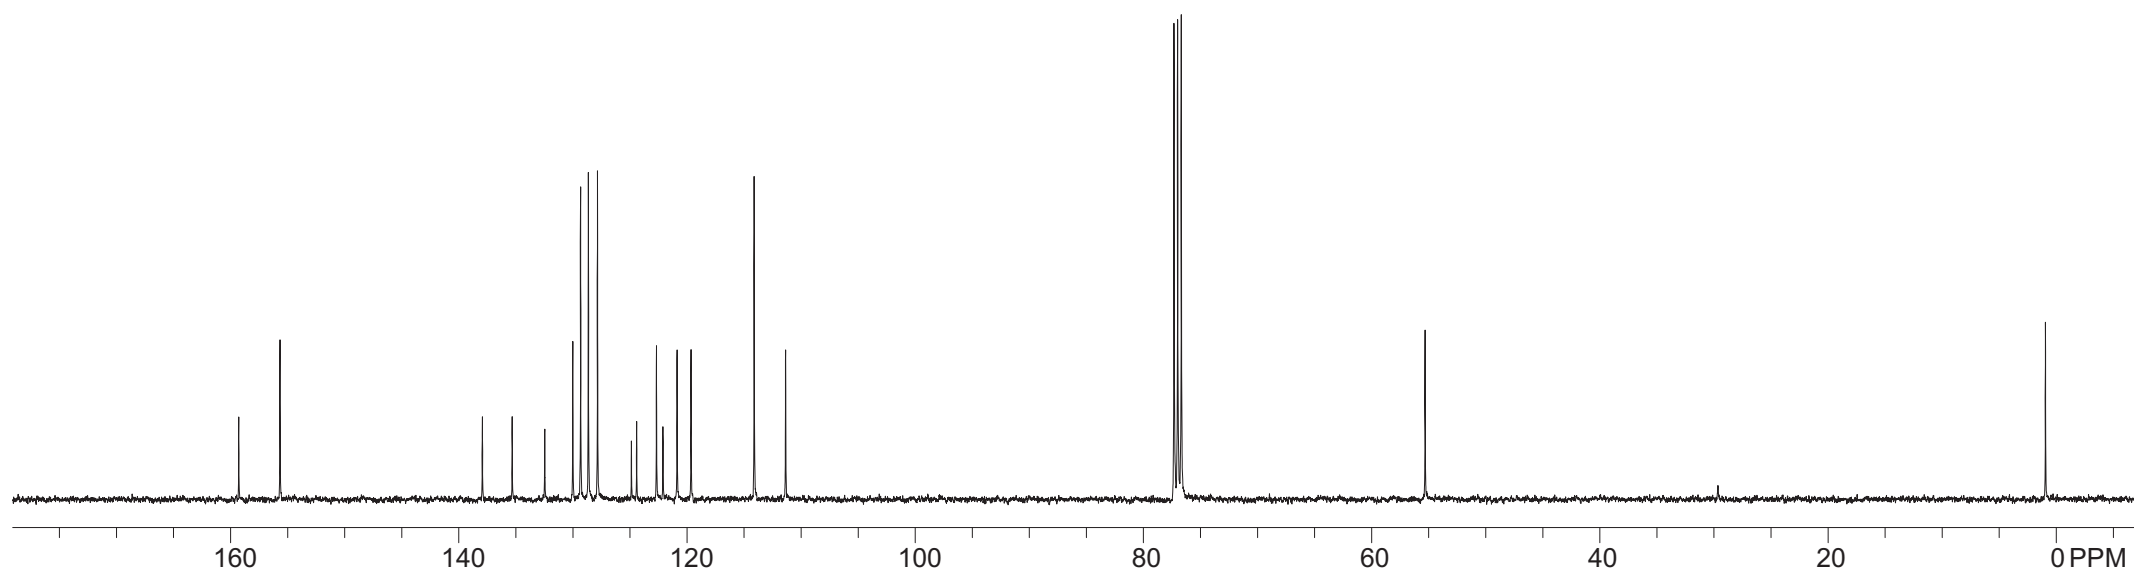

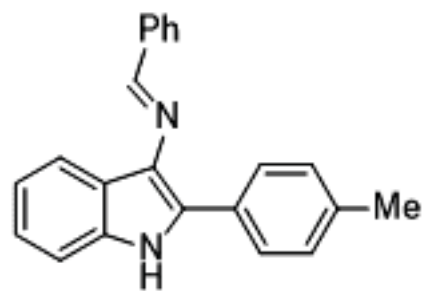

3ca

9.069  
7.908  
8.141  
7.891  
7.756  
7.737  
7.444  
7.429  
7.410  
7.387  
7.281  
7.264  
7.217  
7.198  
7.182  
7.168  
7.156

2.347

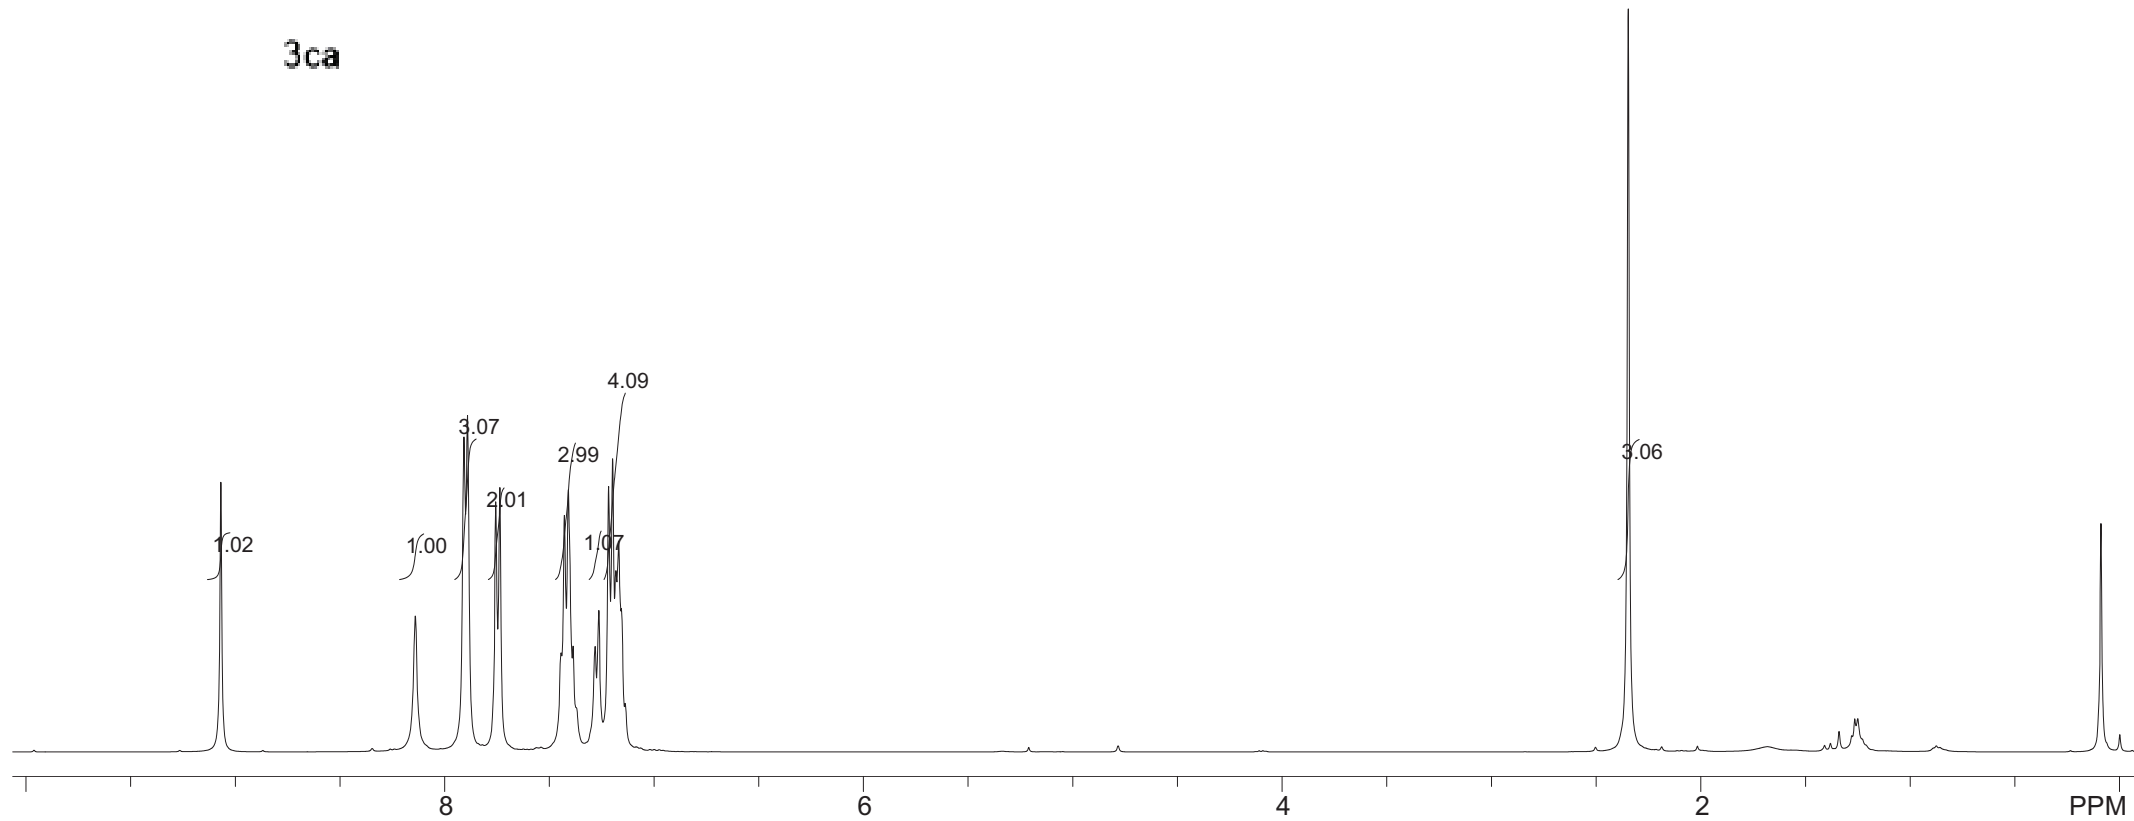

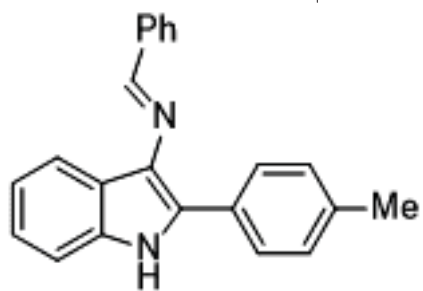

3ca

156.003  
137.870  
137.476  
135.354  
132.350  
130.031  
129.251  
128.843  
128.609  
127.873  
125.394  
122.762  
122.047  
120.800  
119.663  
111.431

77.321  
77.000  
76.687

21.235

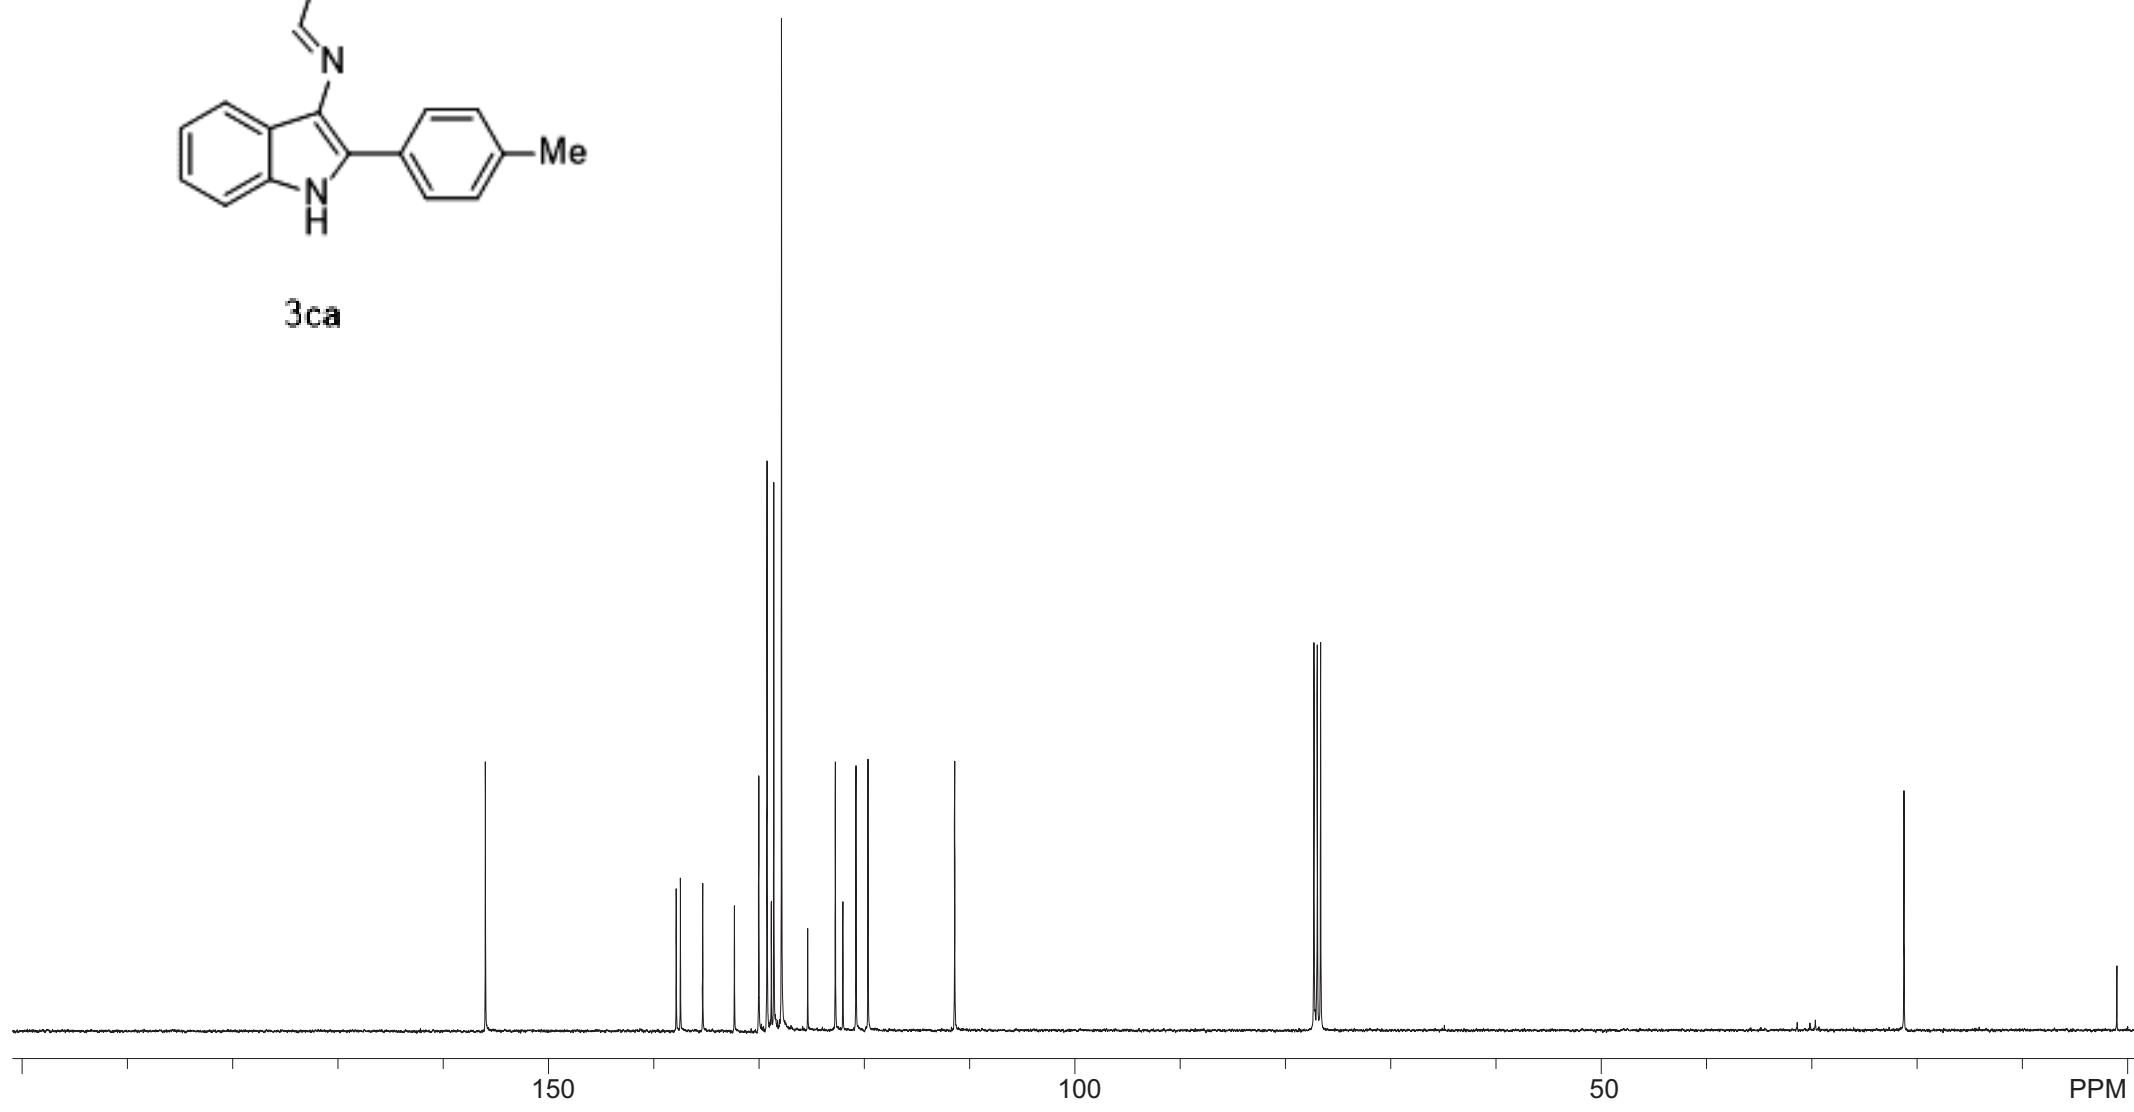



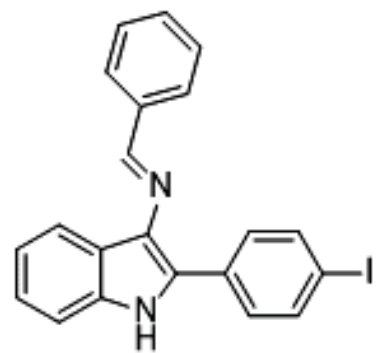

**3da**

9.120  
7.943  
7.924  
7.814  
7.793  
8.236  
7.704  
7.683  
7.506  
7.491  
7.472  
7.455  
7.441  
7.414  
7.395  
7.286  
7.268  
7.256  
7.224  
7.205  
7.187

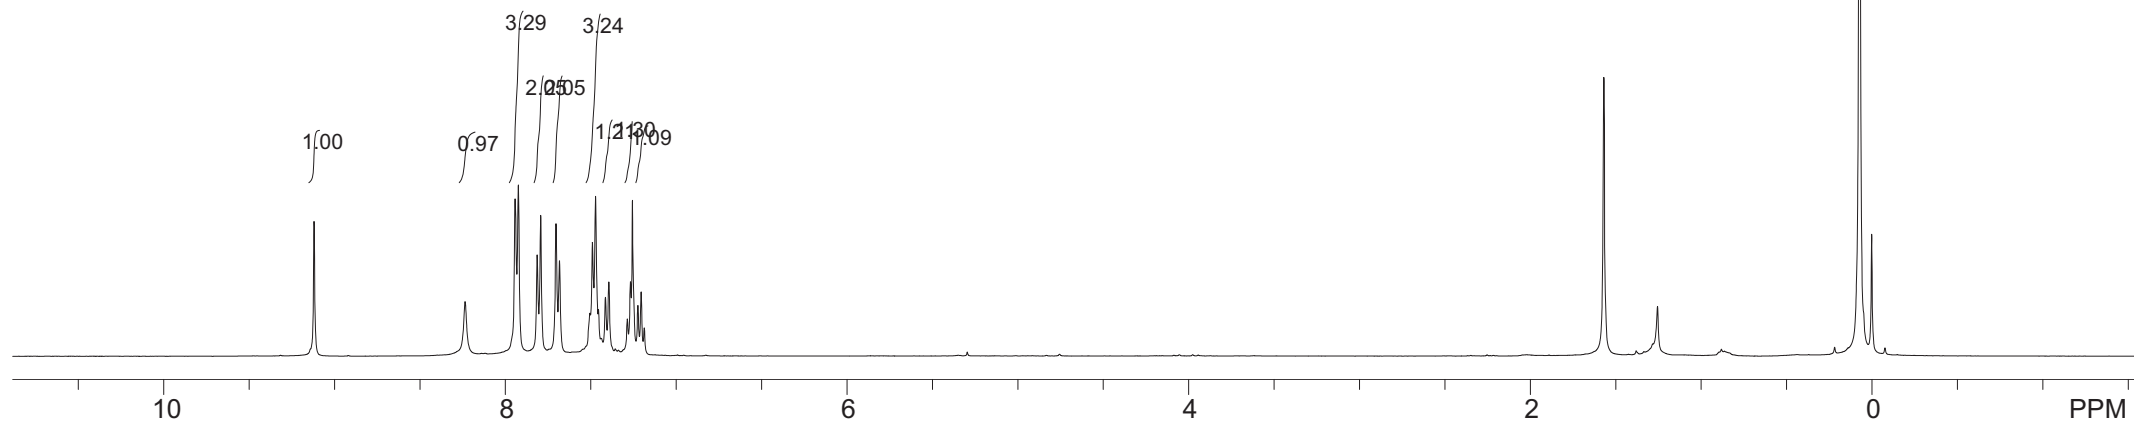

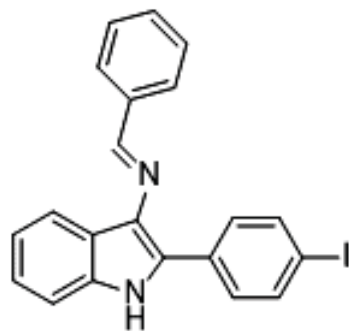

3da

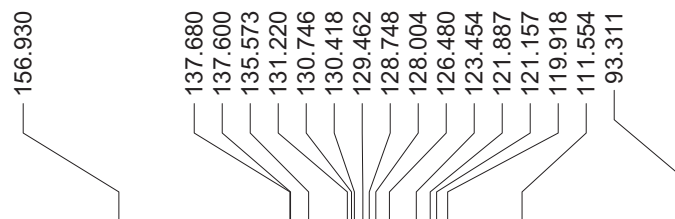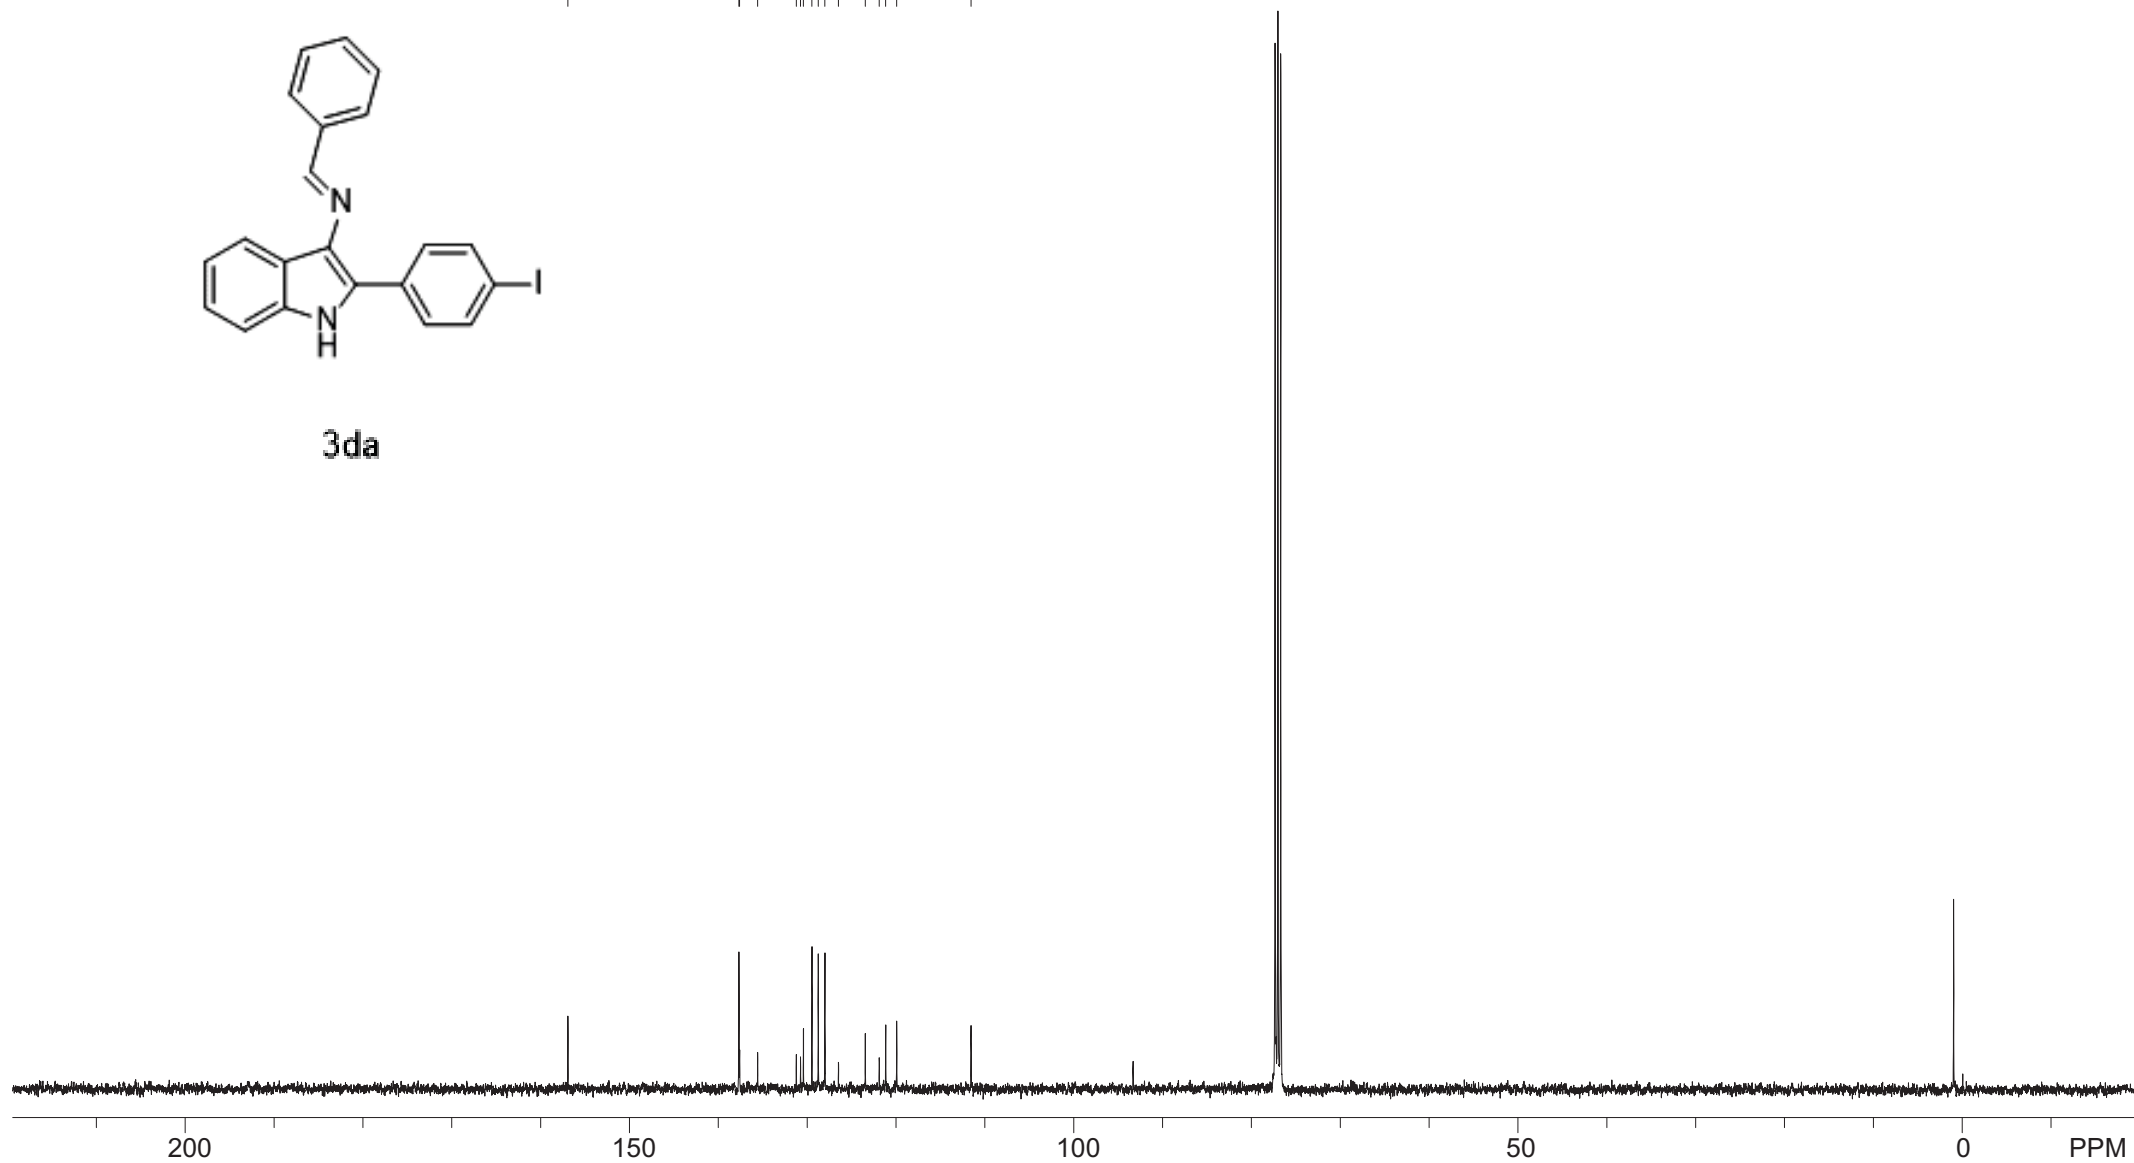

9.041  
8.146  
7.886  
7.873  
7.858  
7.755  
7.735  
7.447  
7.430  
7.350  
7.329  
7.274  
7.255  
7.220  
7.203  
7.183  
7.164  
7.147

0.000

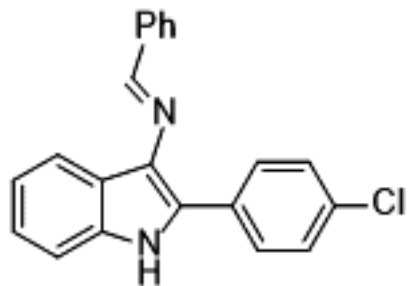

3ea

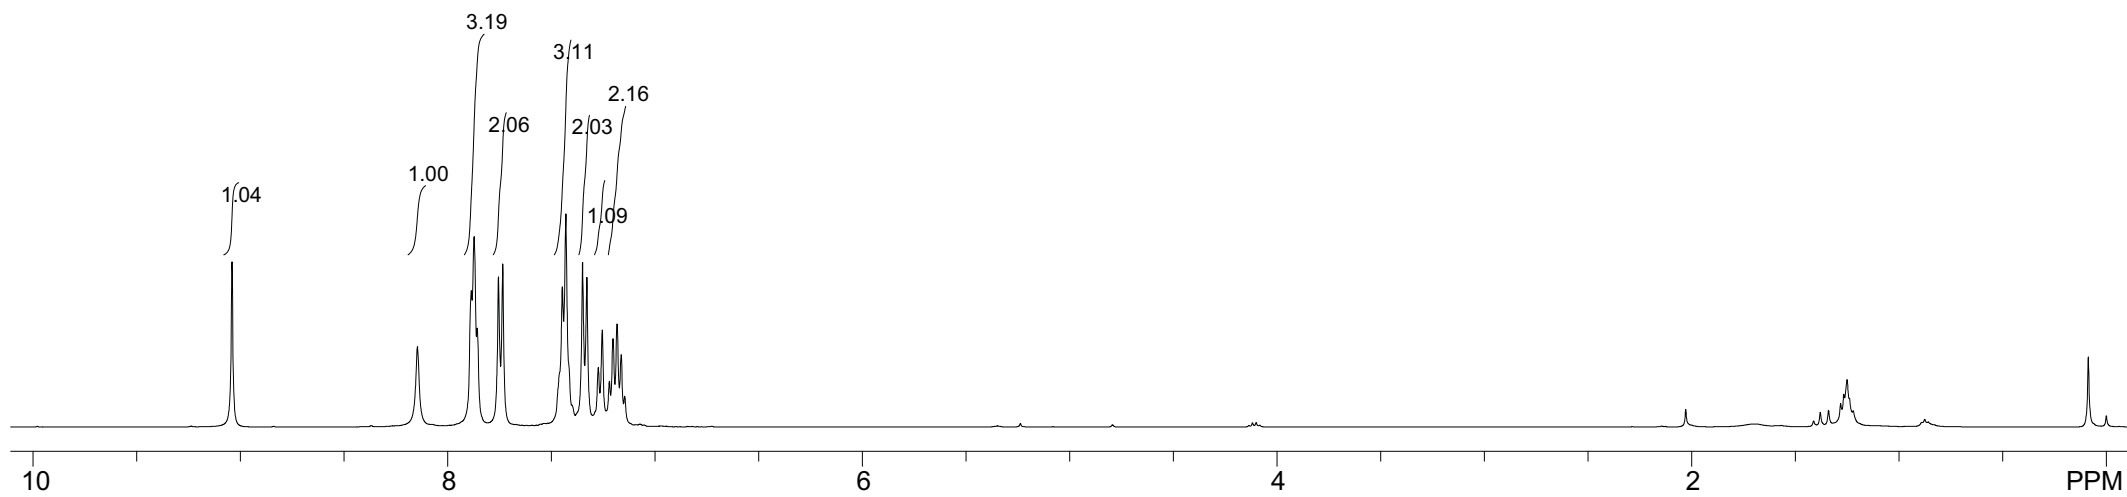

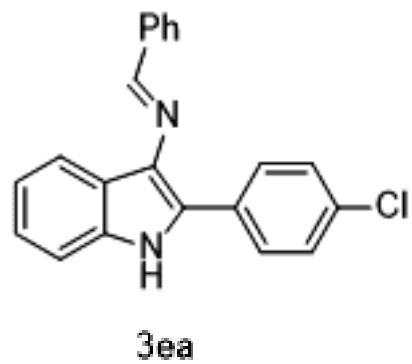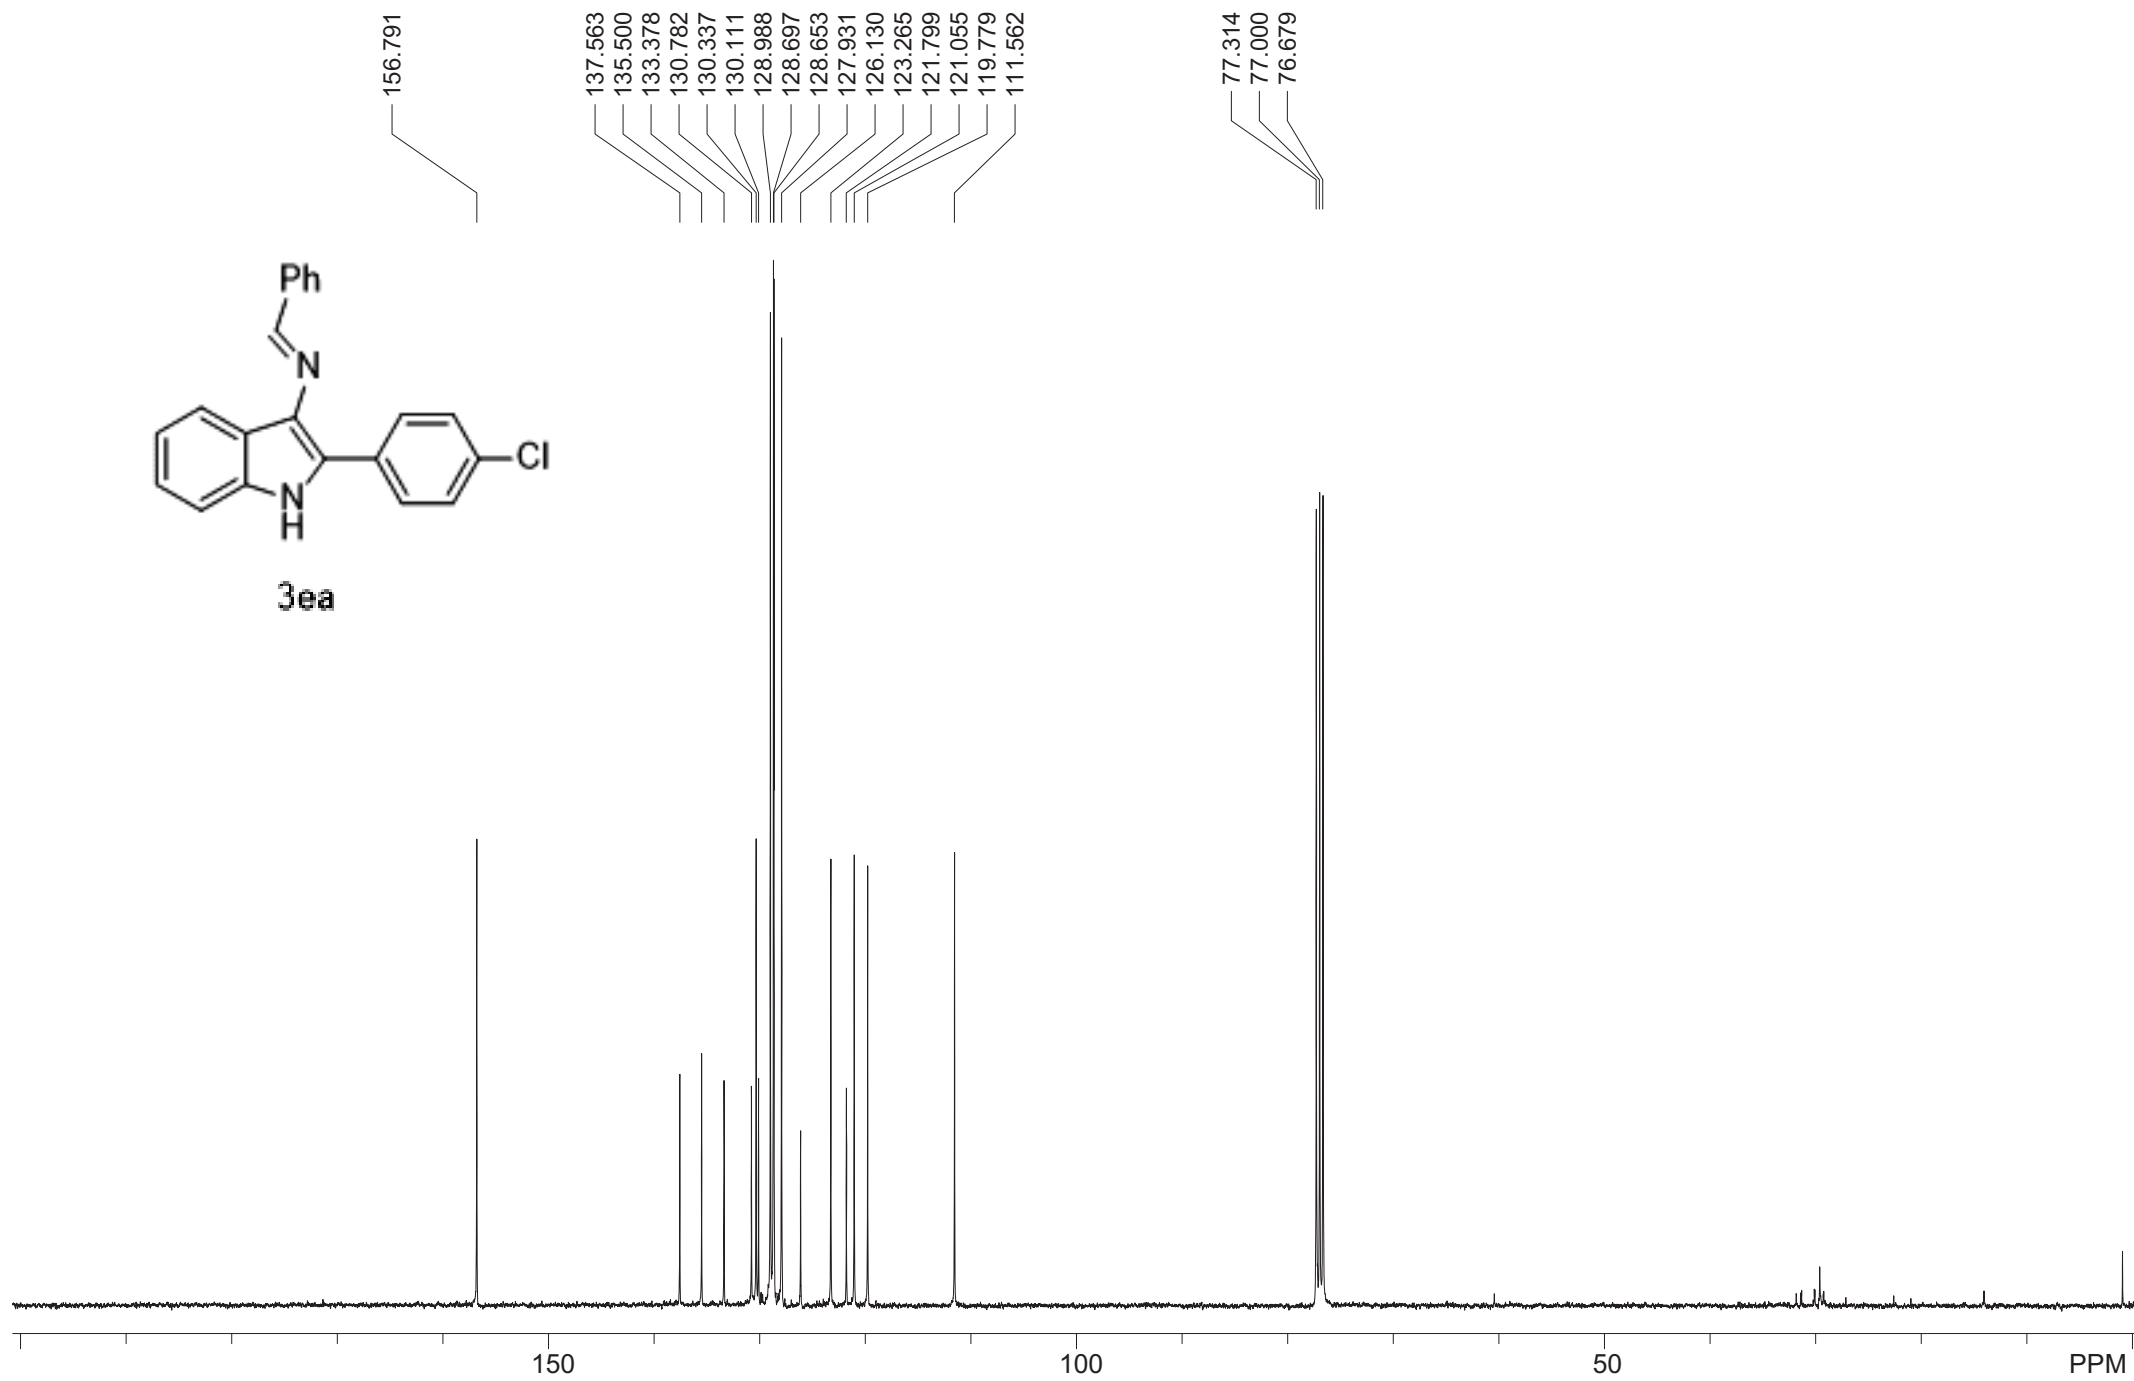

9.063  
8.180  
7.900  
7.892  
7.887  
7.876  
7.733  
7.712  
7.532  
7.510  
7.475  
7.462  
7.444  
7.430  
7.315  
7.296  
7.242  
7.224  
7.205  
7.196  
7.176  
7.158

0.000

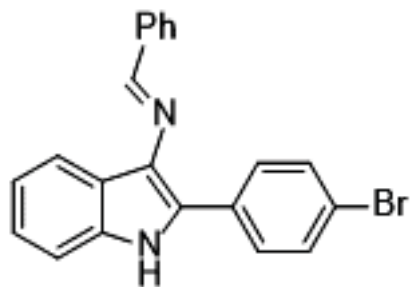

3fa

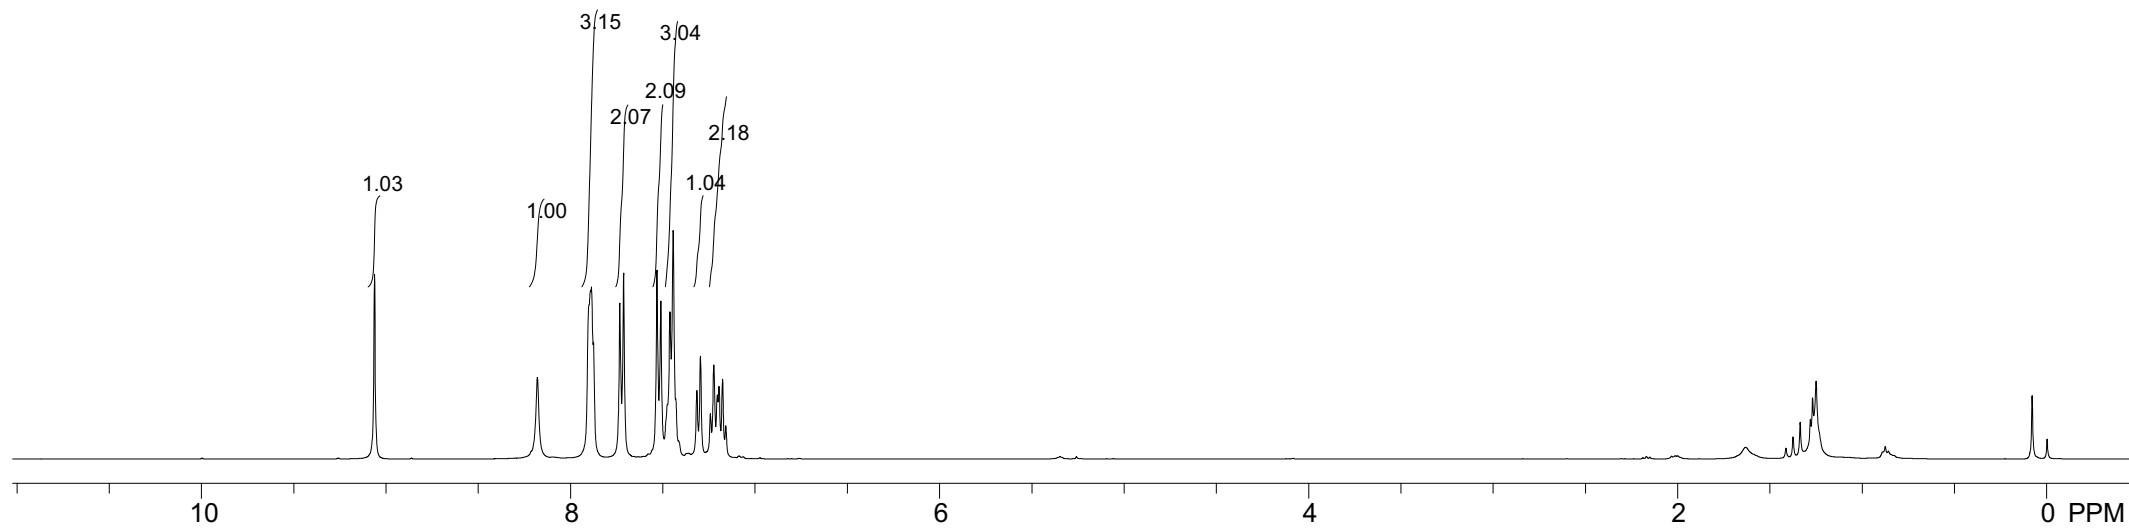

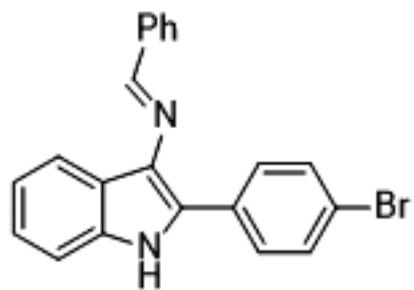

3fa

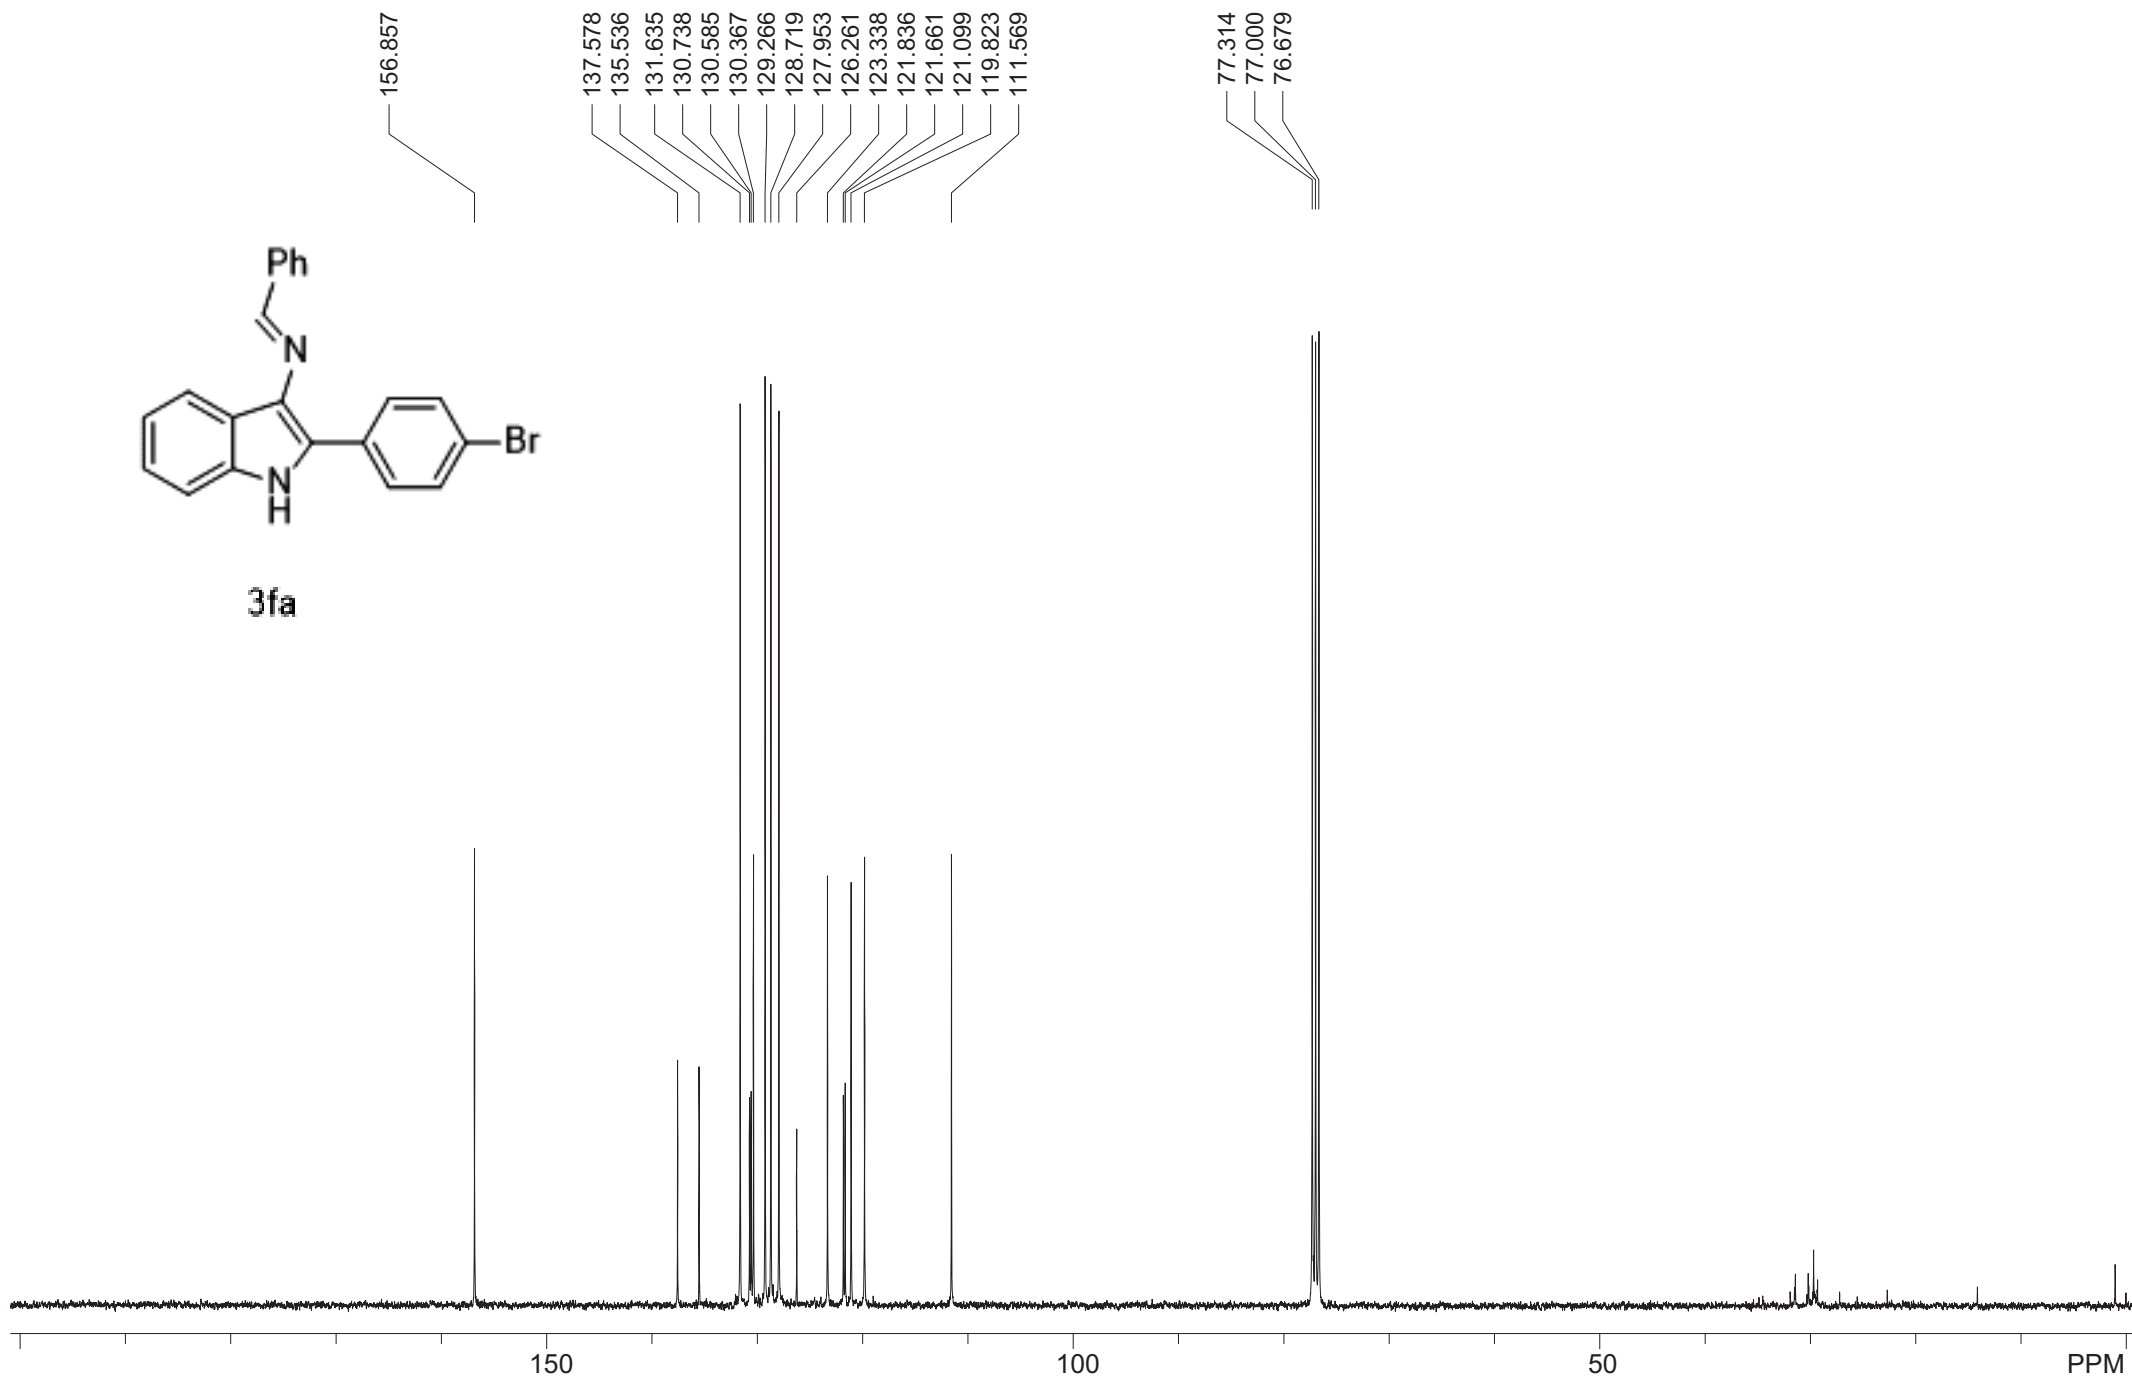

9.128  
7.945  
7.927  
7.912  
7.898  
8.179  
7.891  
7.877  
7.491  
7.477  
7.458  
7.438  
7.387  
7.367  
7.265  
7.247  
7.243  
7.227  
7.221  
7.201  
7.182  
7.160  
7.138

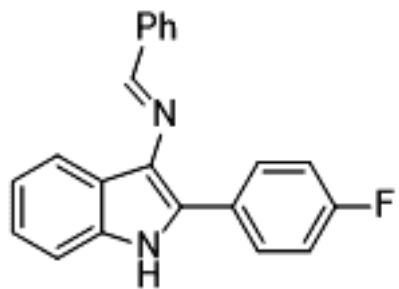

3ga

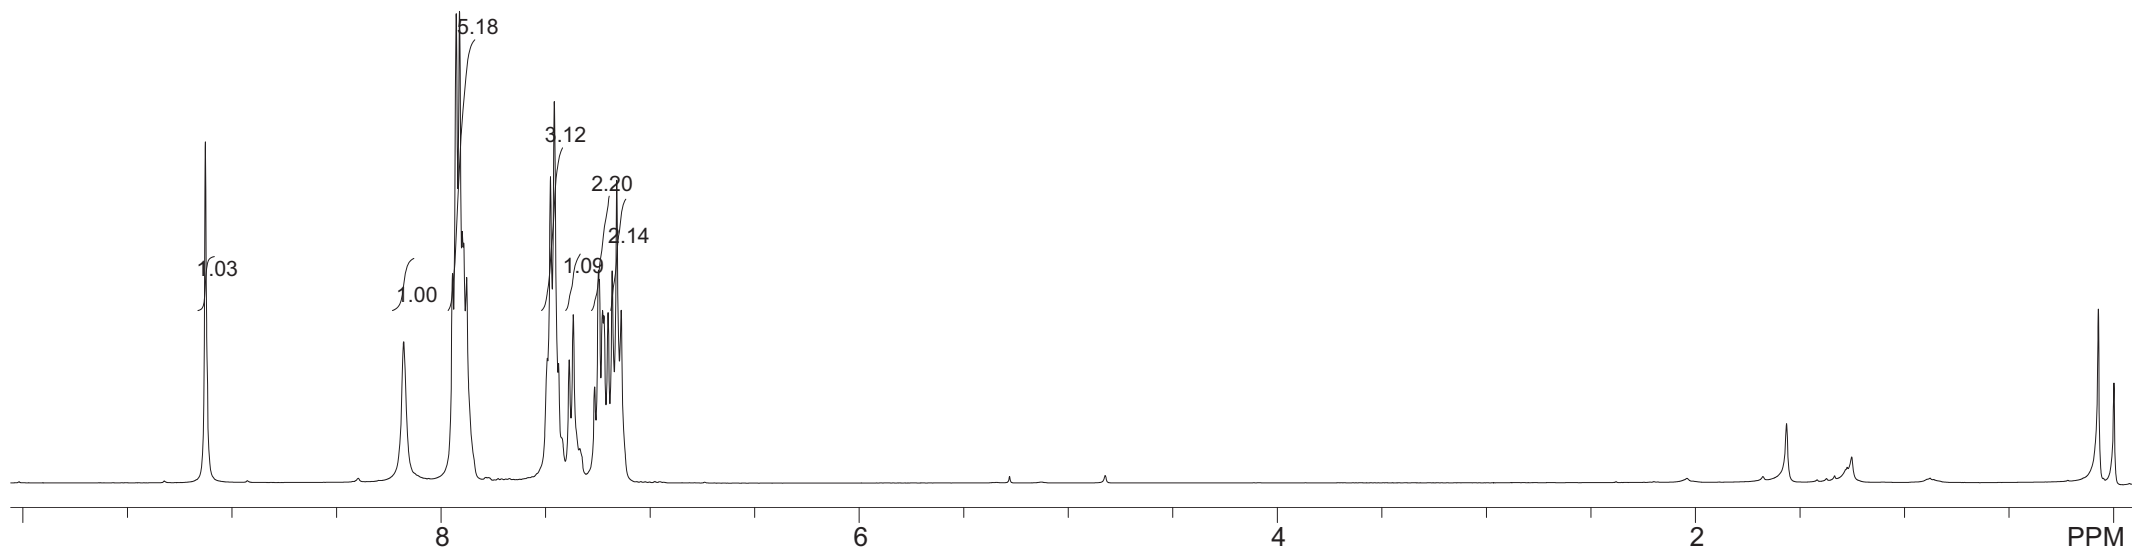

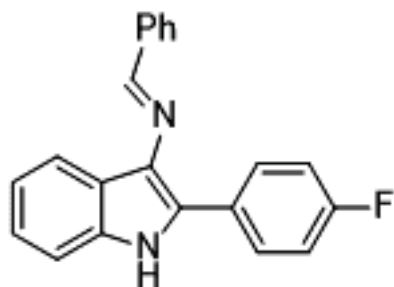

3ga

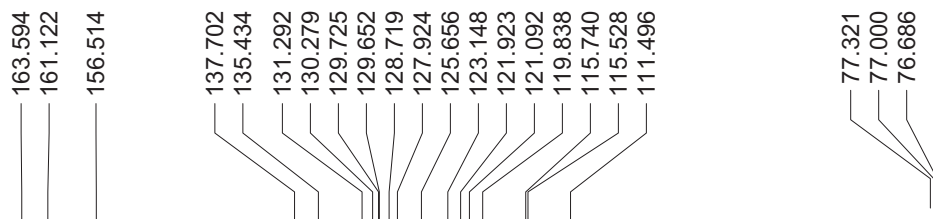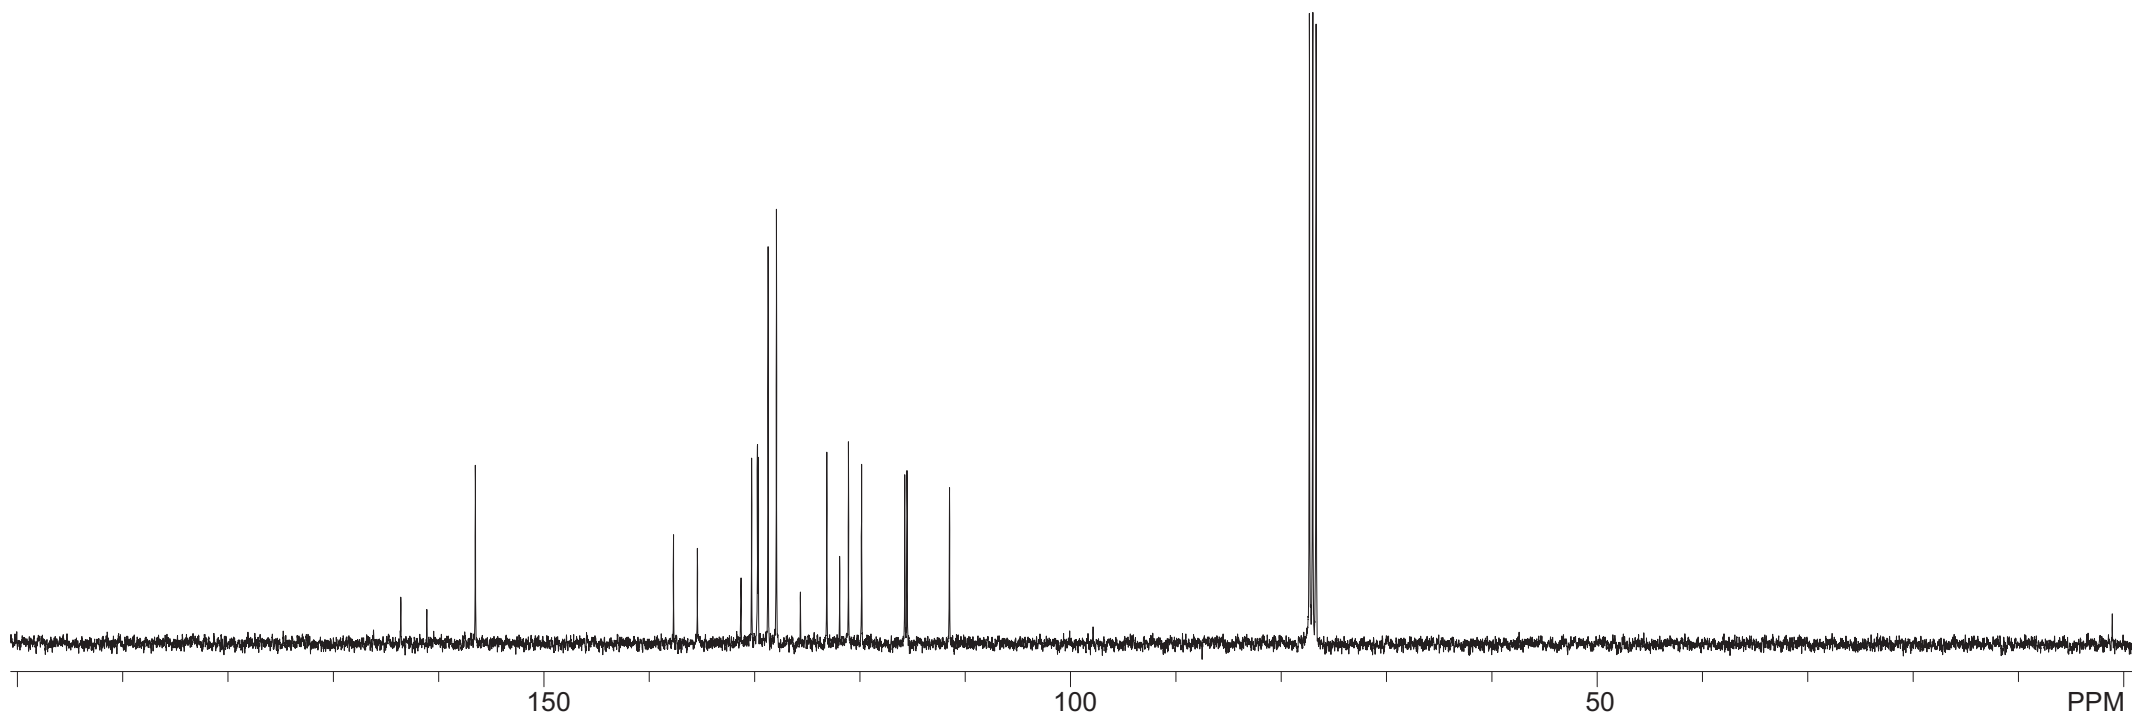



9.076  
8.273  
7.987  
7.968  
7.921  
7.903  
7.880  
7.661  
7.641  
7.480  
7.465  
7.351  
7.331  
7.271  
7.254  
7.234  
7.227  
7.212  
7.193  
7.175

0.000

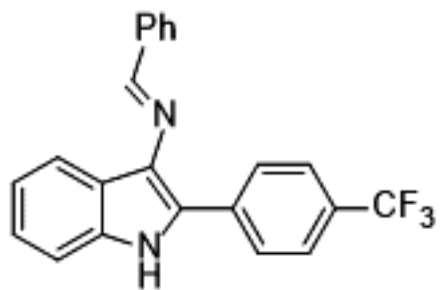

3ha

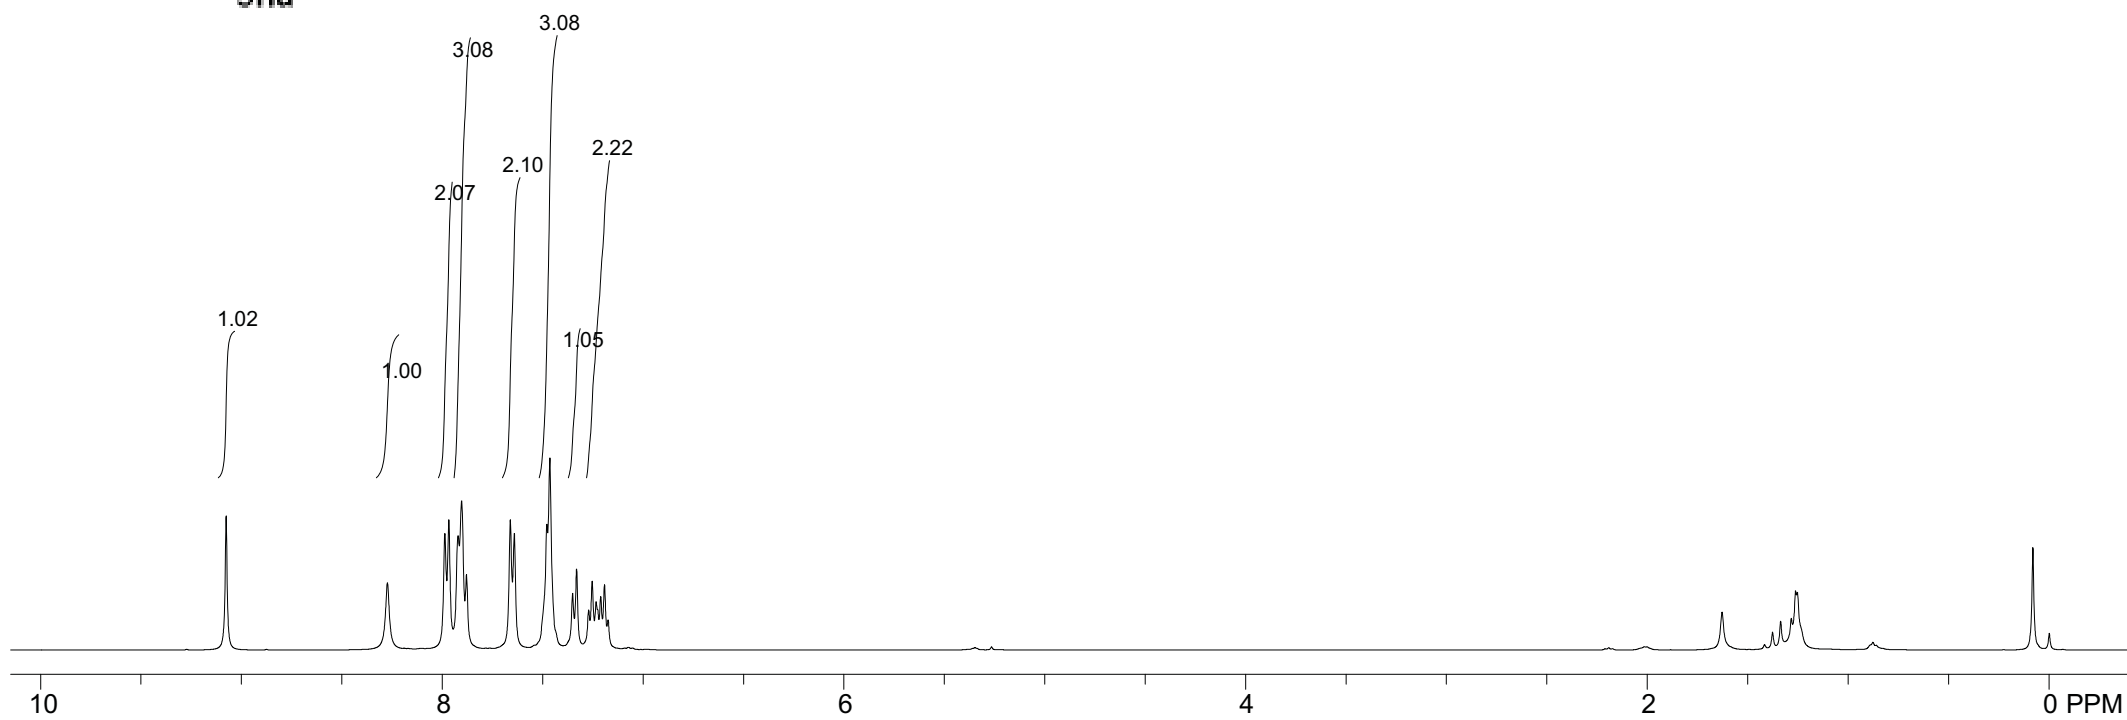

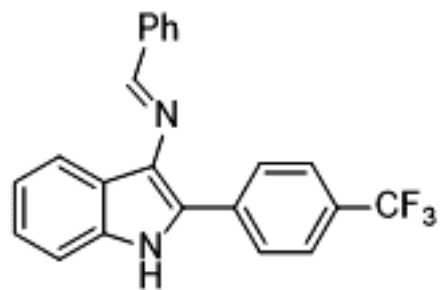

3ha

157.739

137.425

135.777

135.113

130.600

129.841

129.098

128.784

128.070

127.734

127.362

125.569

125.459

125.423

125.386

125.350

123.775

122.871

121.733

121.238

119.991

111.686

77.314

77.000

76.679

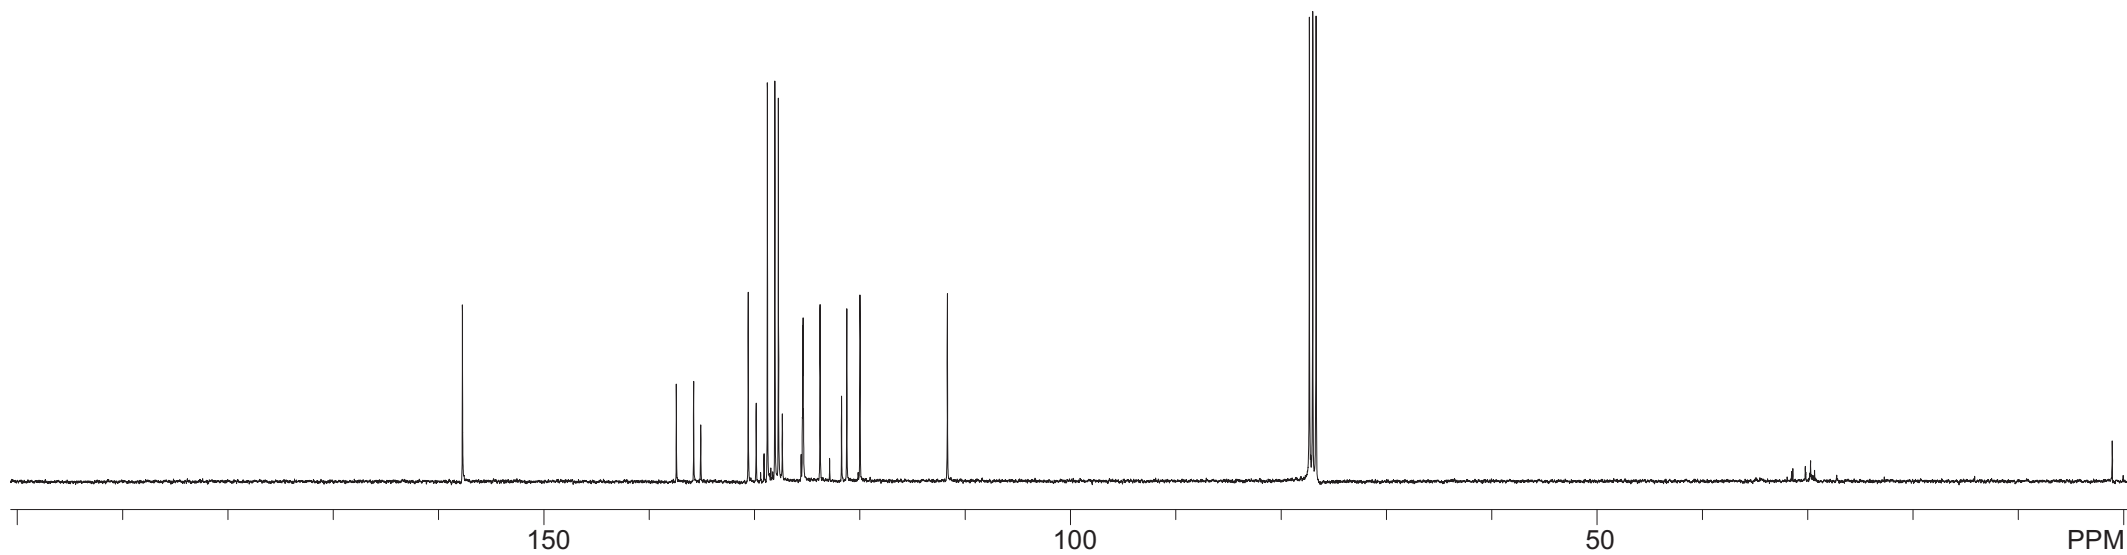

9.124  
8.085  
8.064  
7.963  
7.957  
8.335  
7.944  
7.940  
7.914  
7.751  
7.730  
7.519  
7.504  
7.477  
7.451  
7.430  
7.331  
7.313  
7.293  
7.259  
7.246  
7.227  
7.209

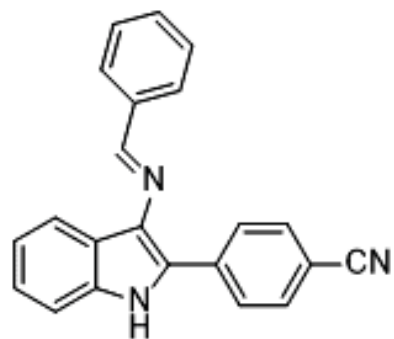

3a

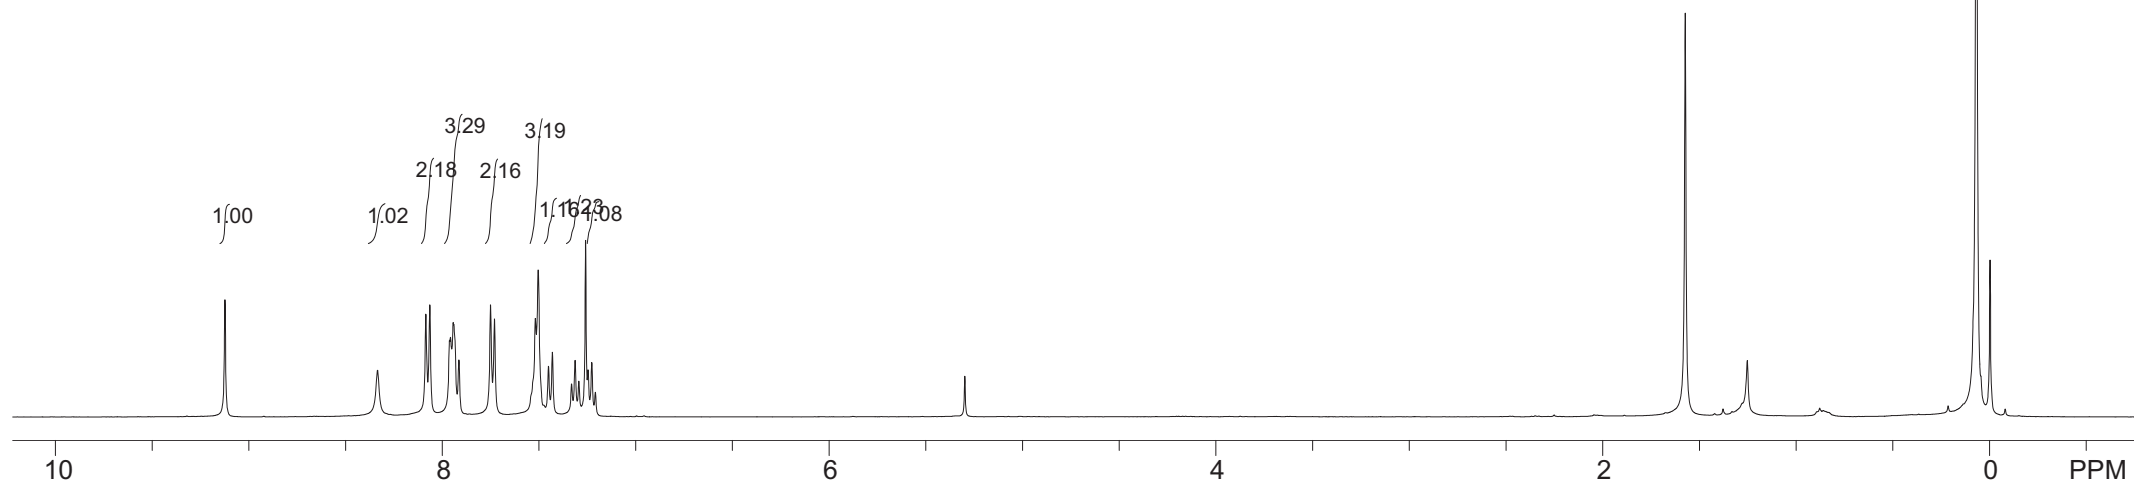

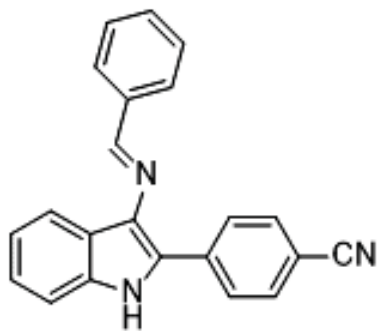

3ia

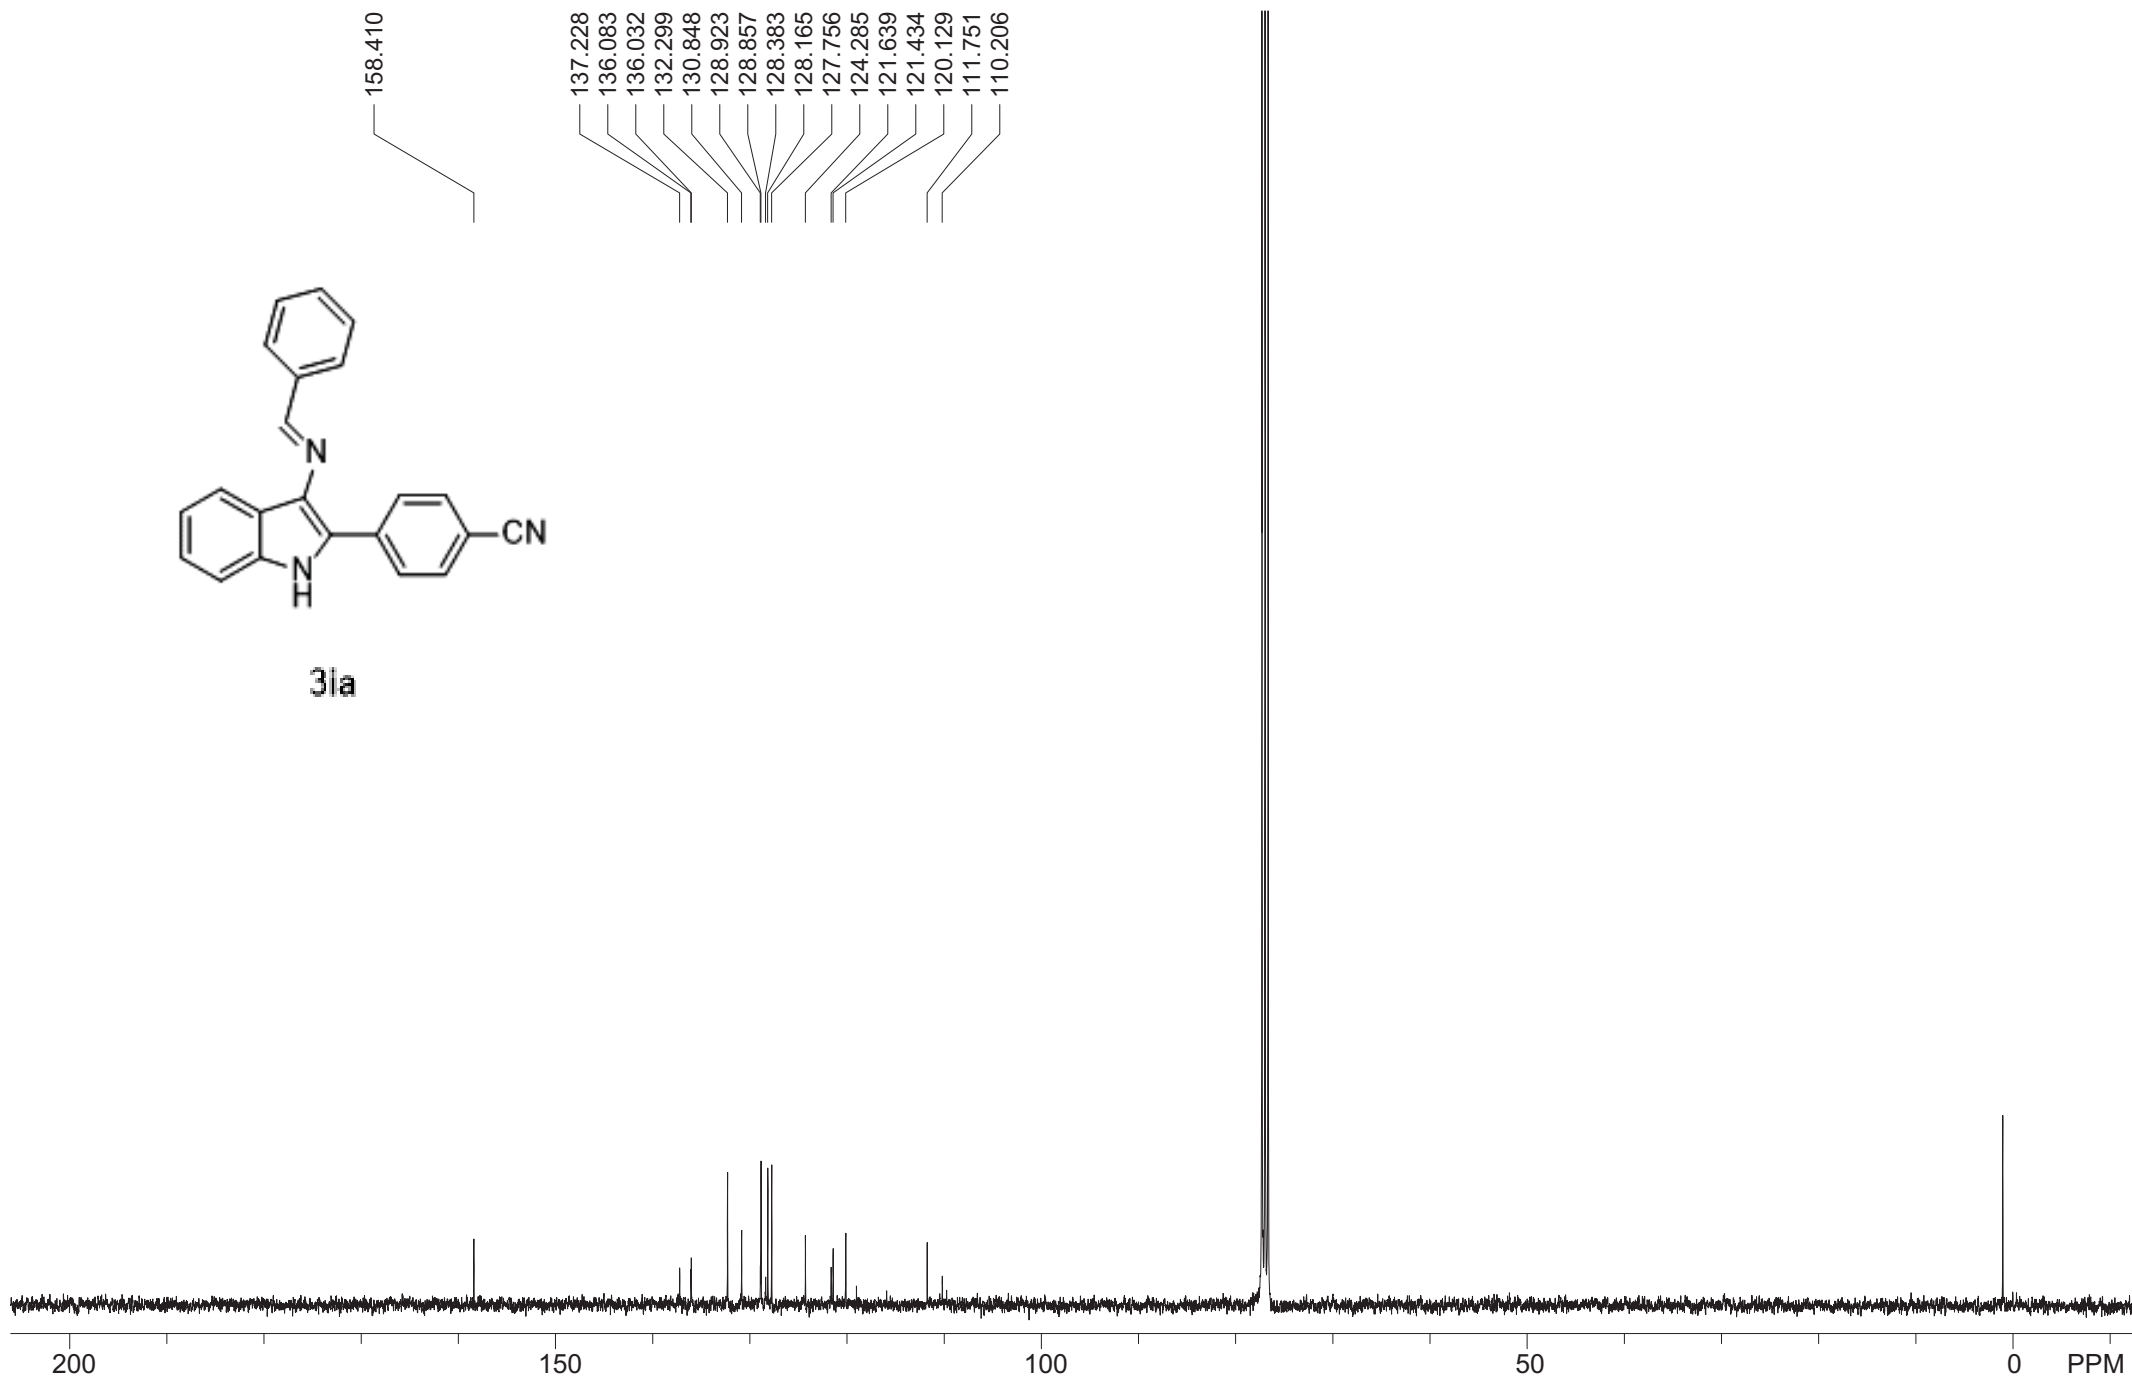

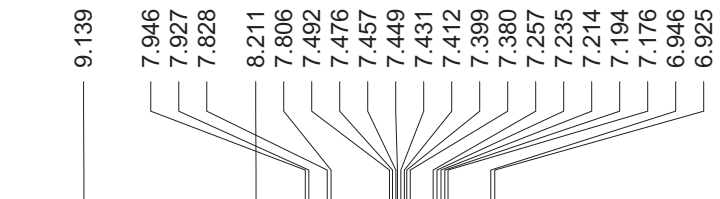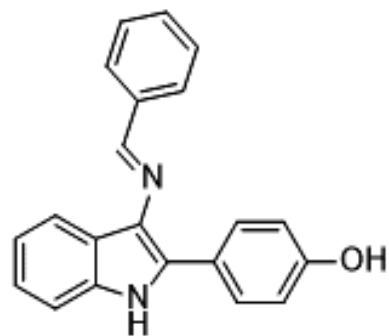

3ja

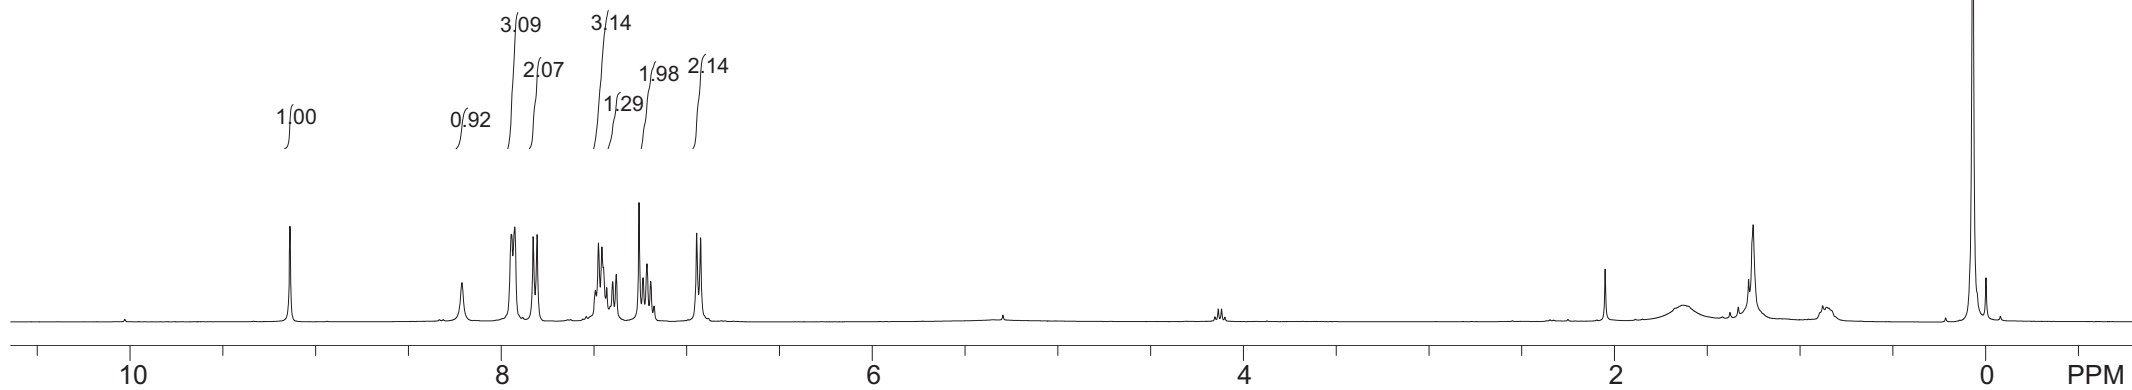

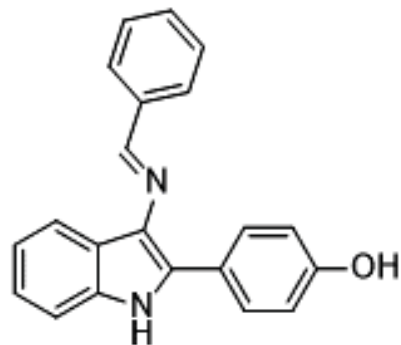

3ja

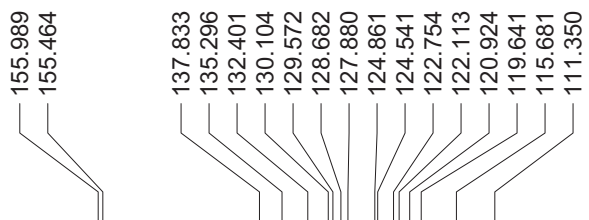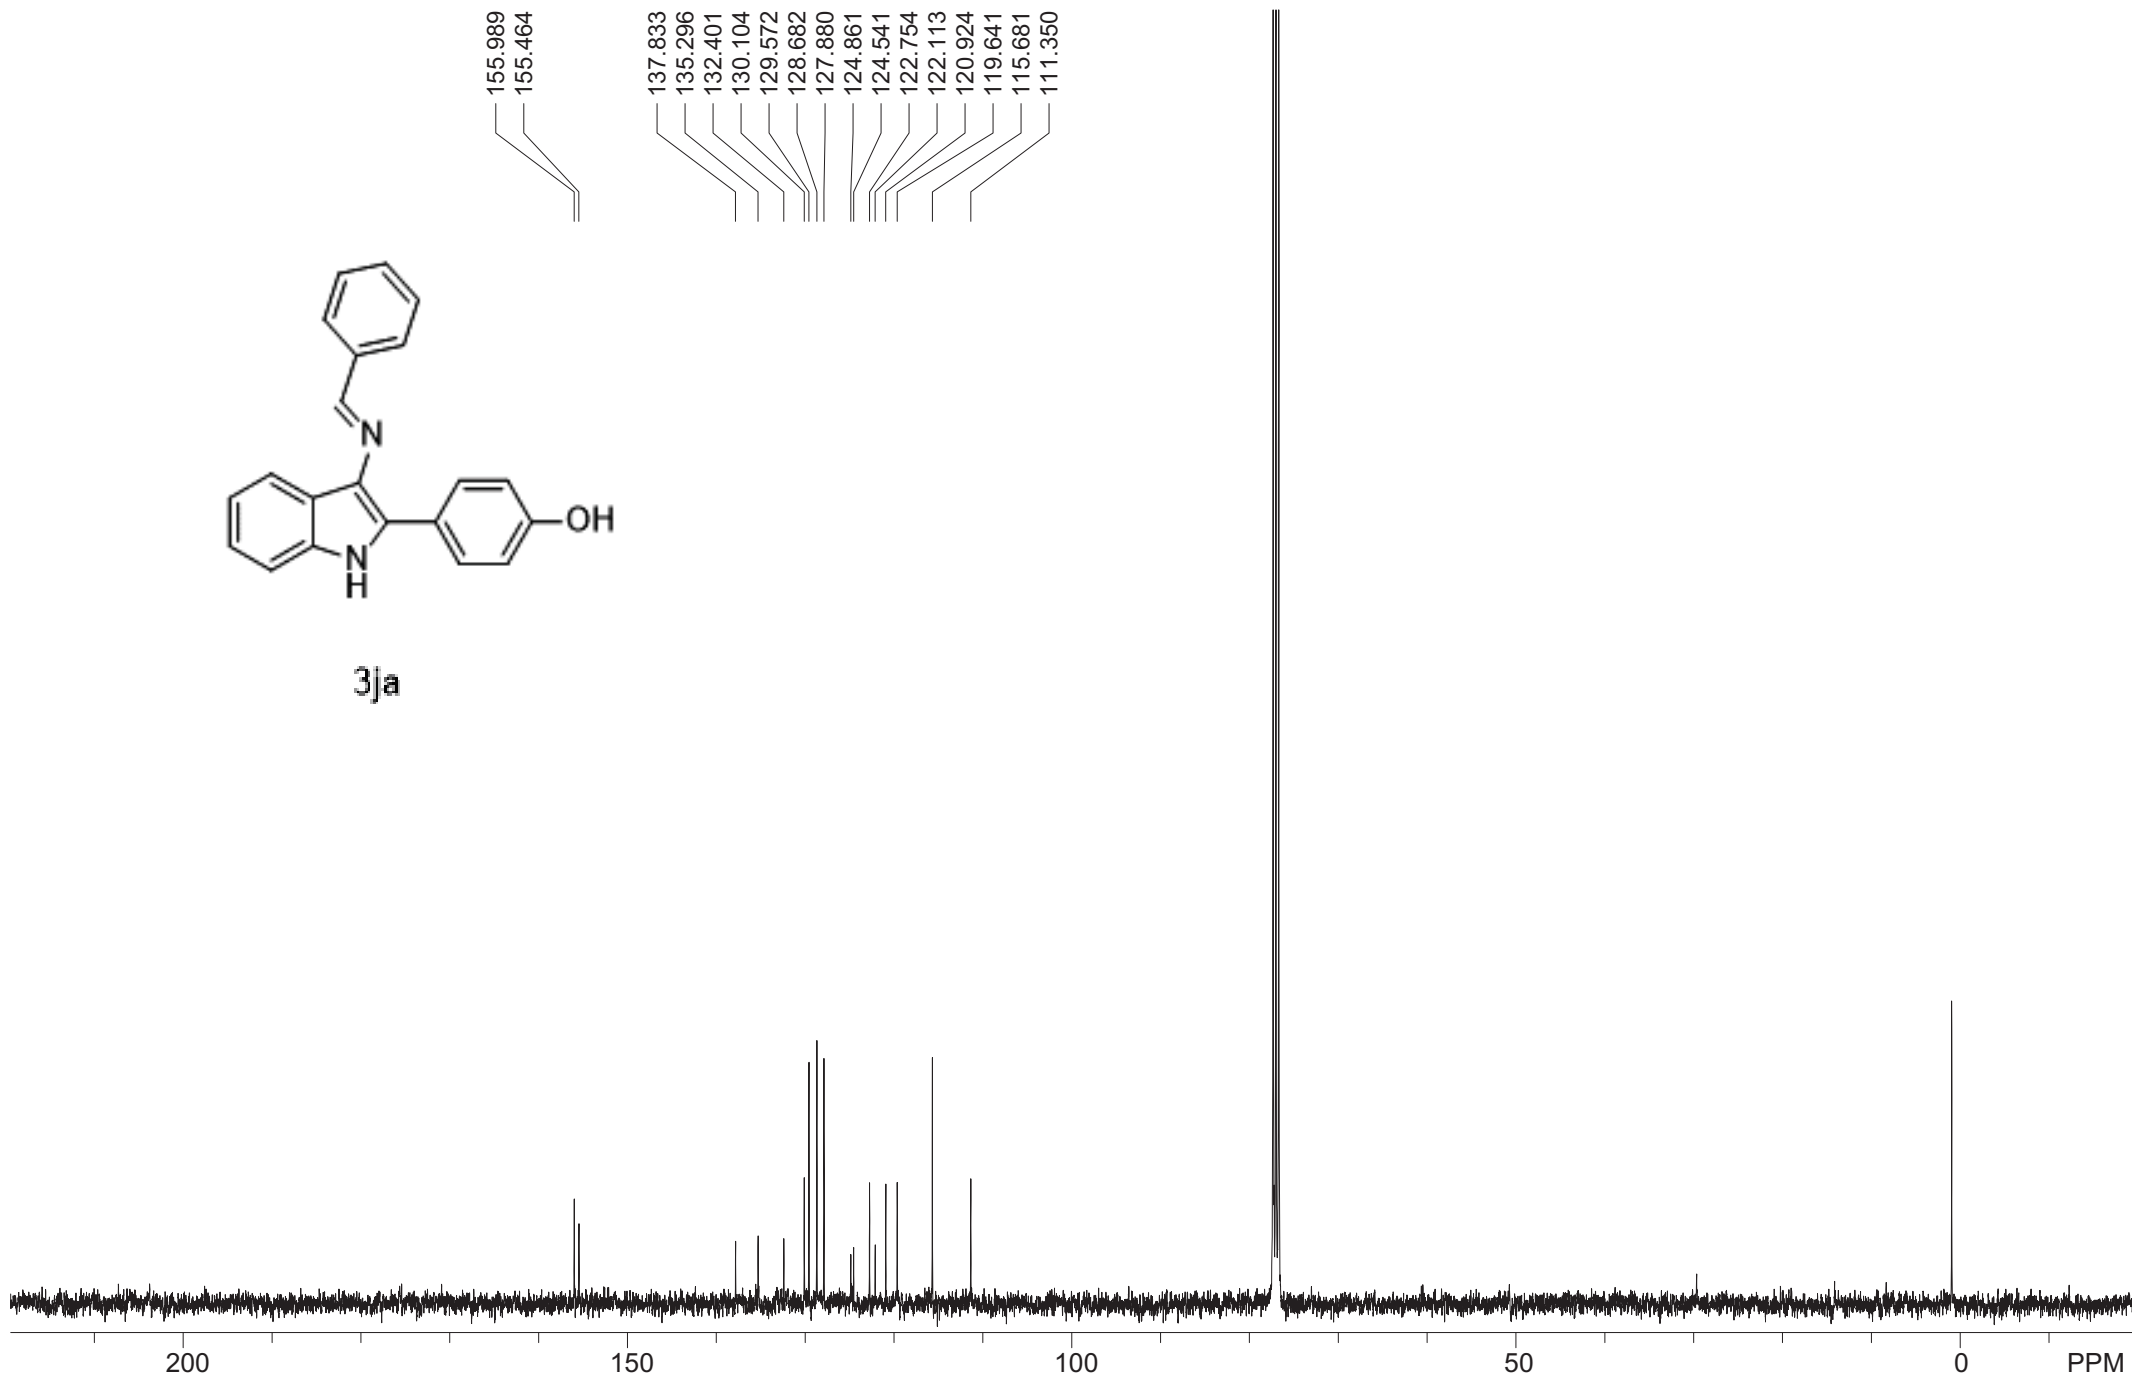

9.076  
 7.921  
 7.905  
 7.724  
 8.181  
 7.685  
 7.666  
 7.457  
 7.440  
 7.422  
 7.397  
 7.328  
 7.310  
 7.296  
 7.216  
 7.199  
 7.180  
 7.163  
 7.145  
 7.130  
 7.111

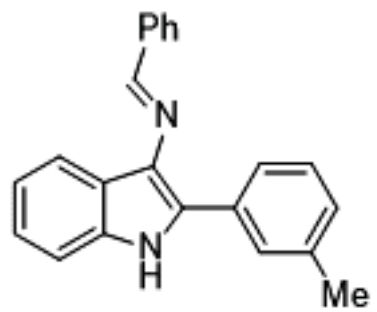

3ka

2.387

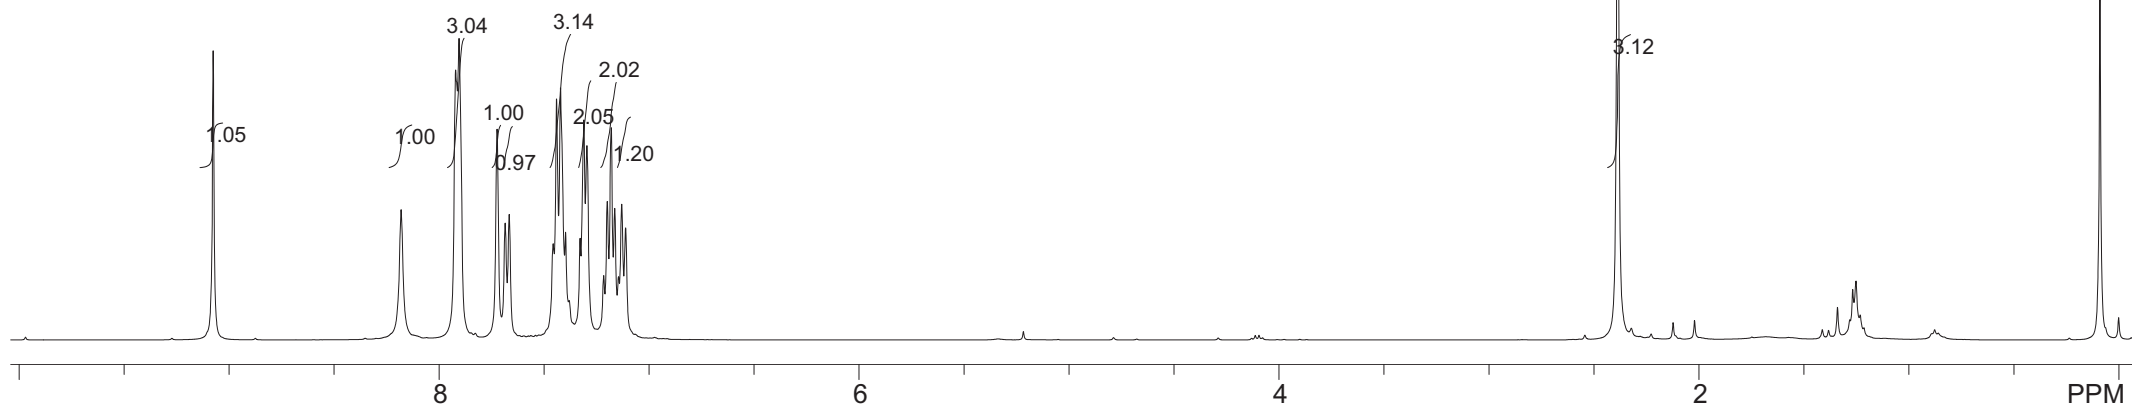

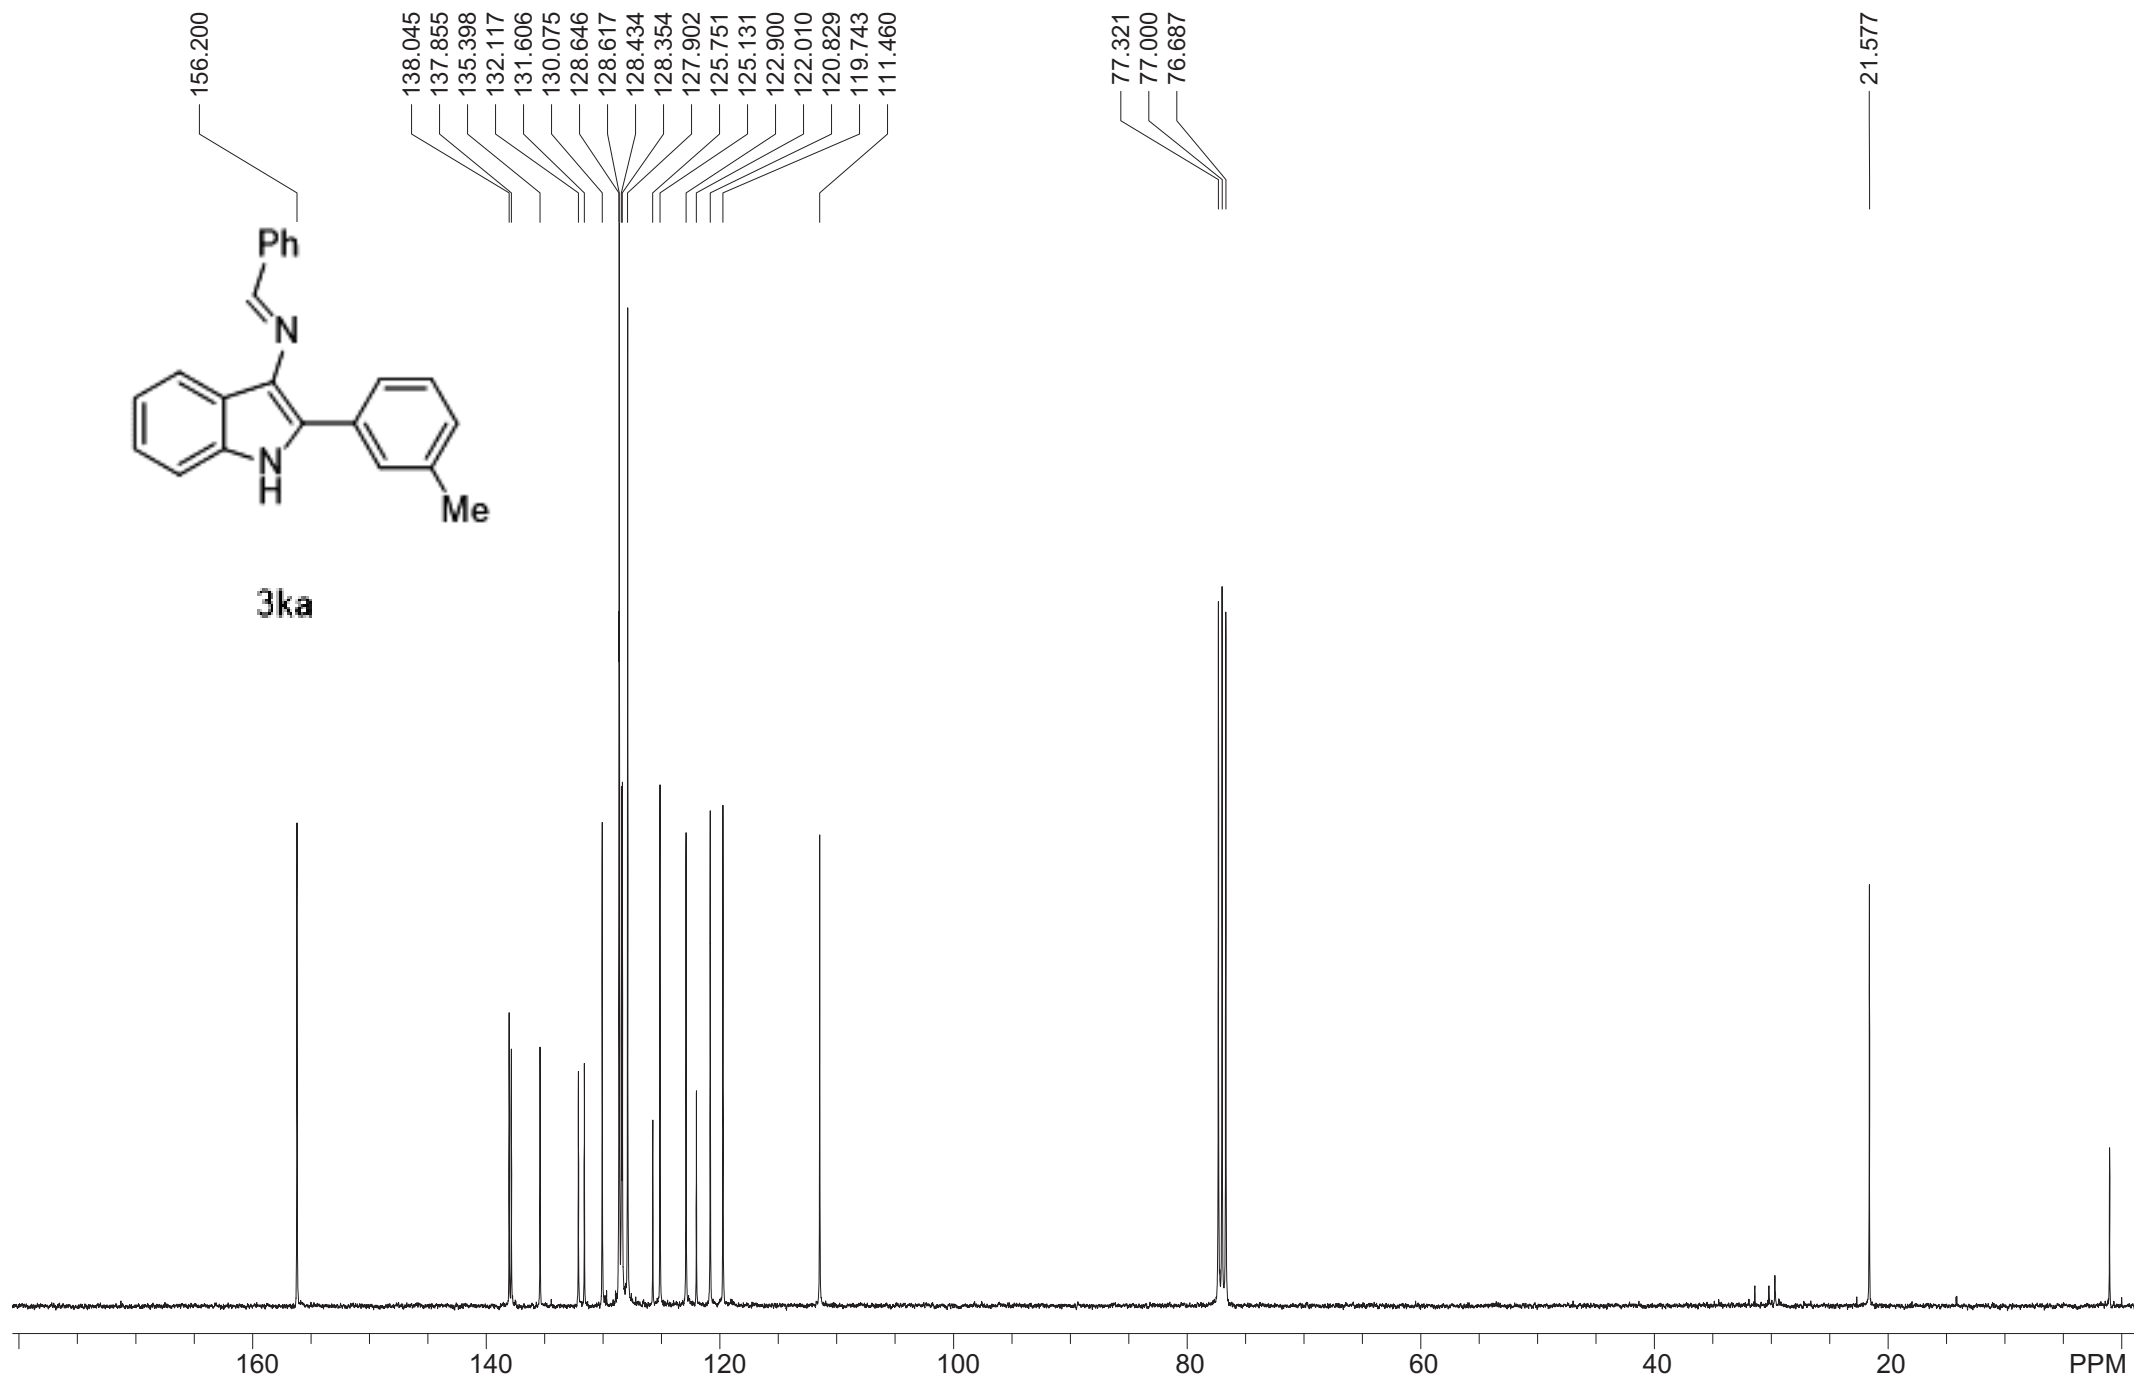



9.063  
8.216  
8.128  
7.930  
7.912  
7.901  
7.880  
7.781  
7.762  
7.484  
7.469  
7.450  
7.429  
7.407  
7.386  
7.331  
7.311  
7.266  
7.246  
7.226  
7.217  
7.207  
7.194  
7.175  
7.157

-0.000

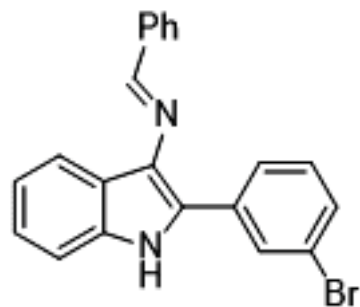

3la

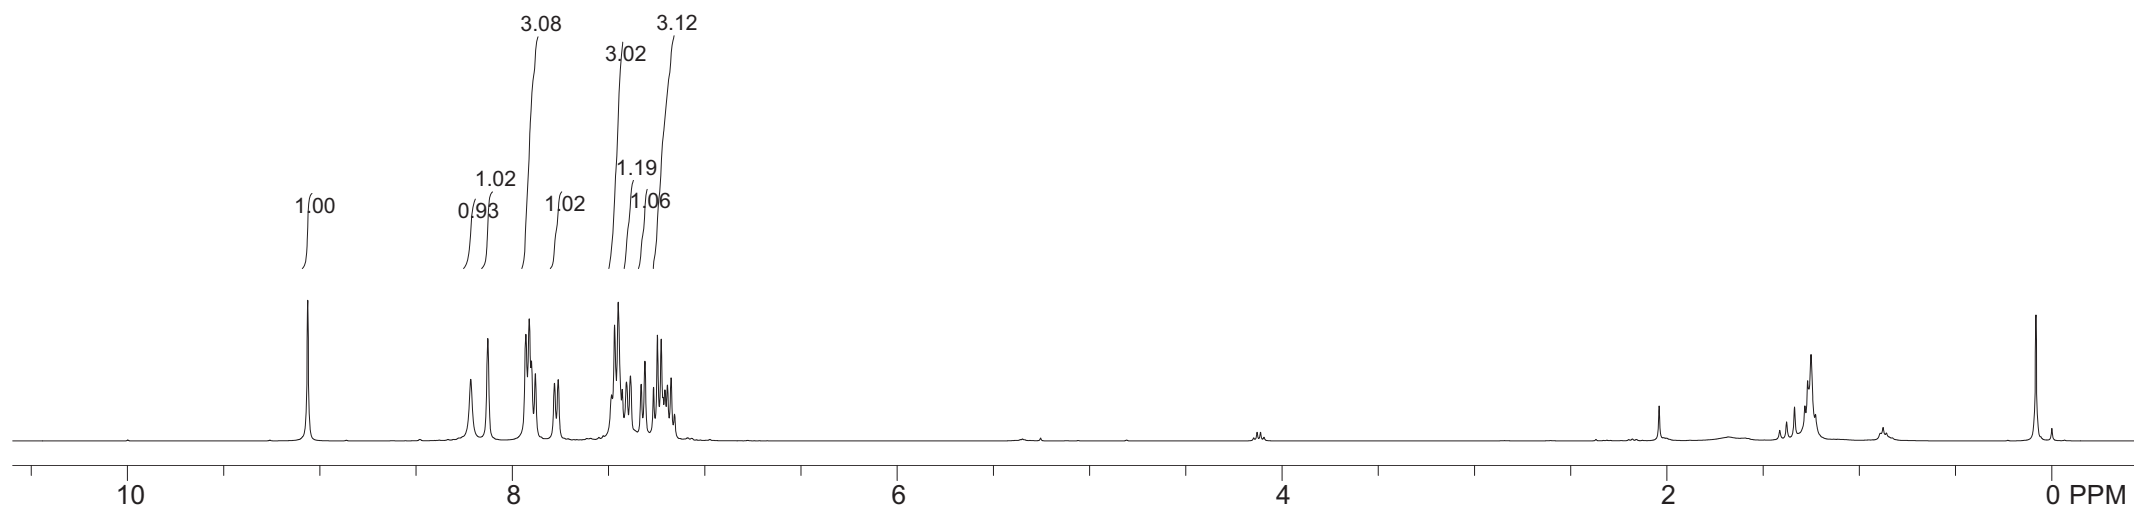

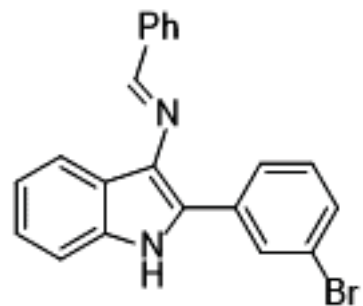

3la

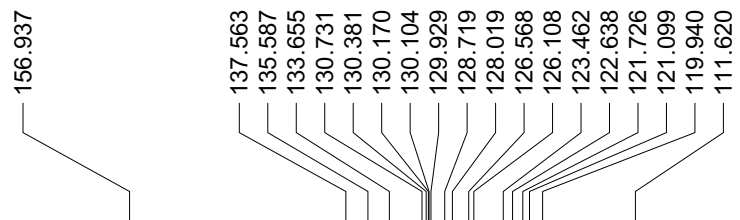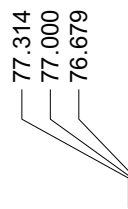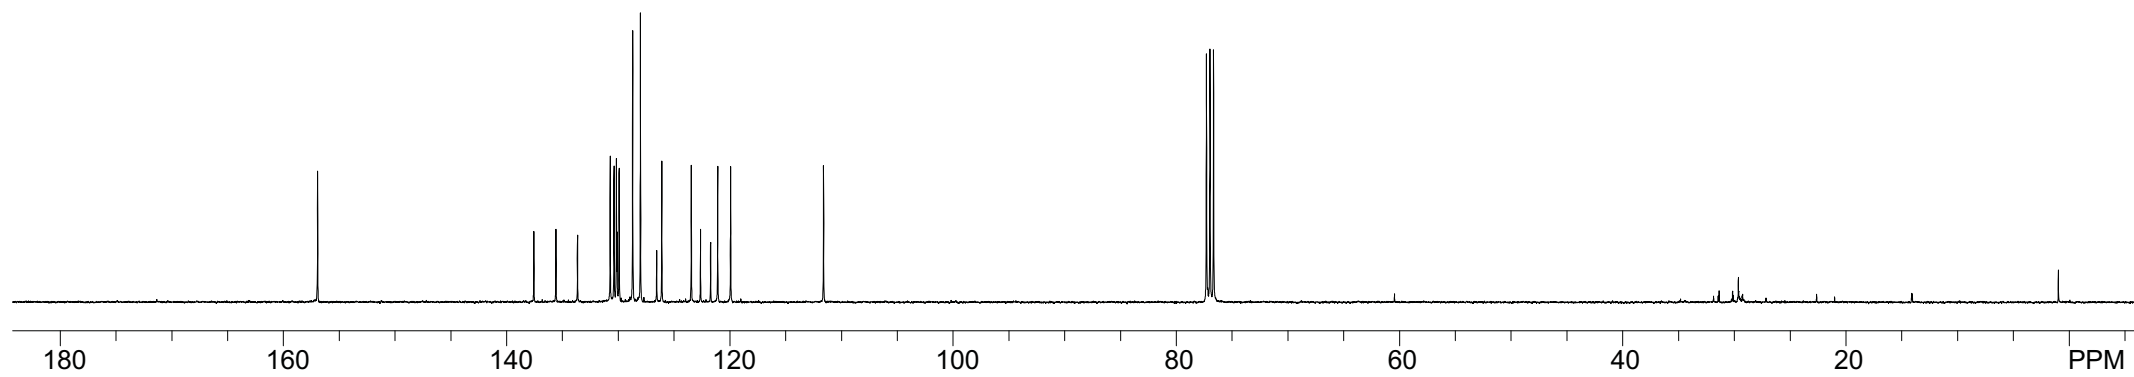

8.909  
 8.050  
 7.976  
 7.963  
 7.955  
 7.759  
 7.749  
 7.405  
 7.387  
 7.347  
 7.337  
 7.284  
 7.215  
 7.205  
 7.196

2.328

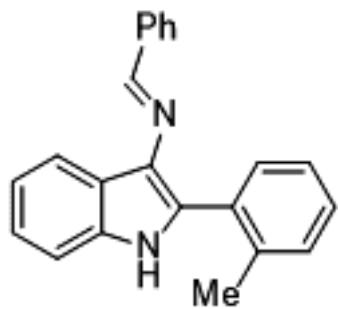

3ma

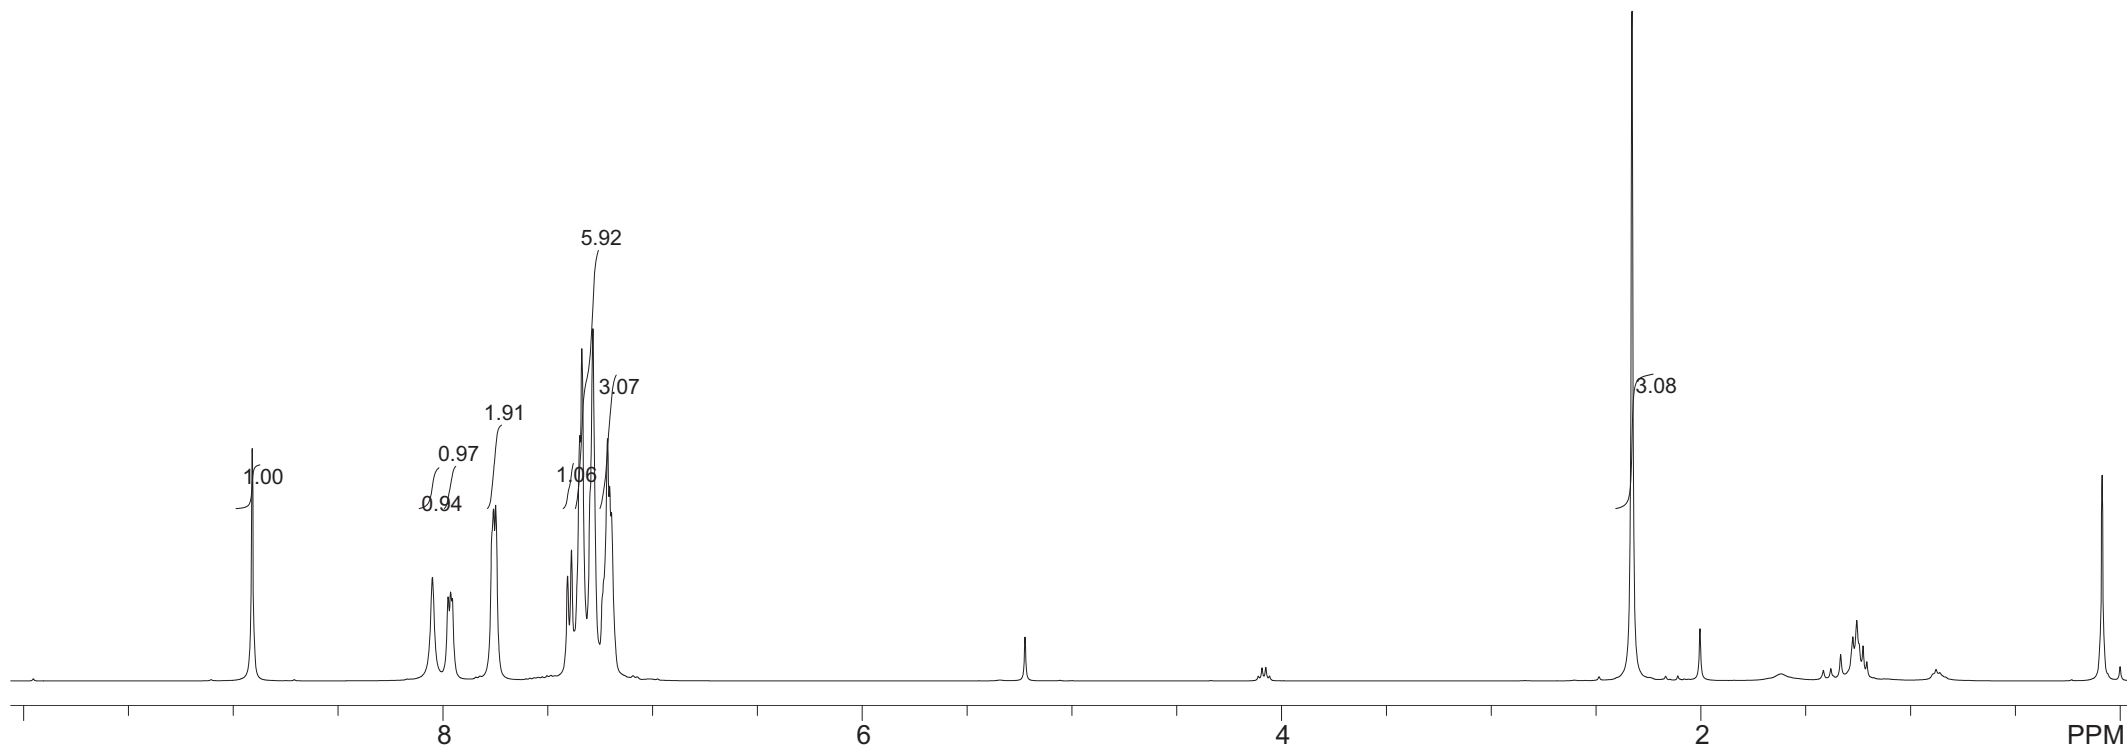

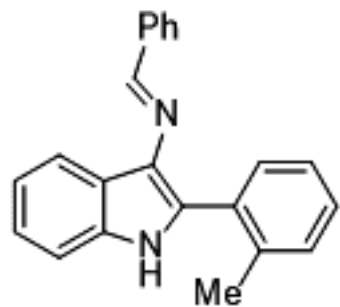

3ma

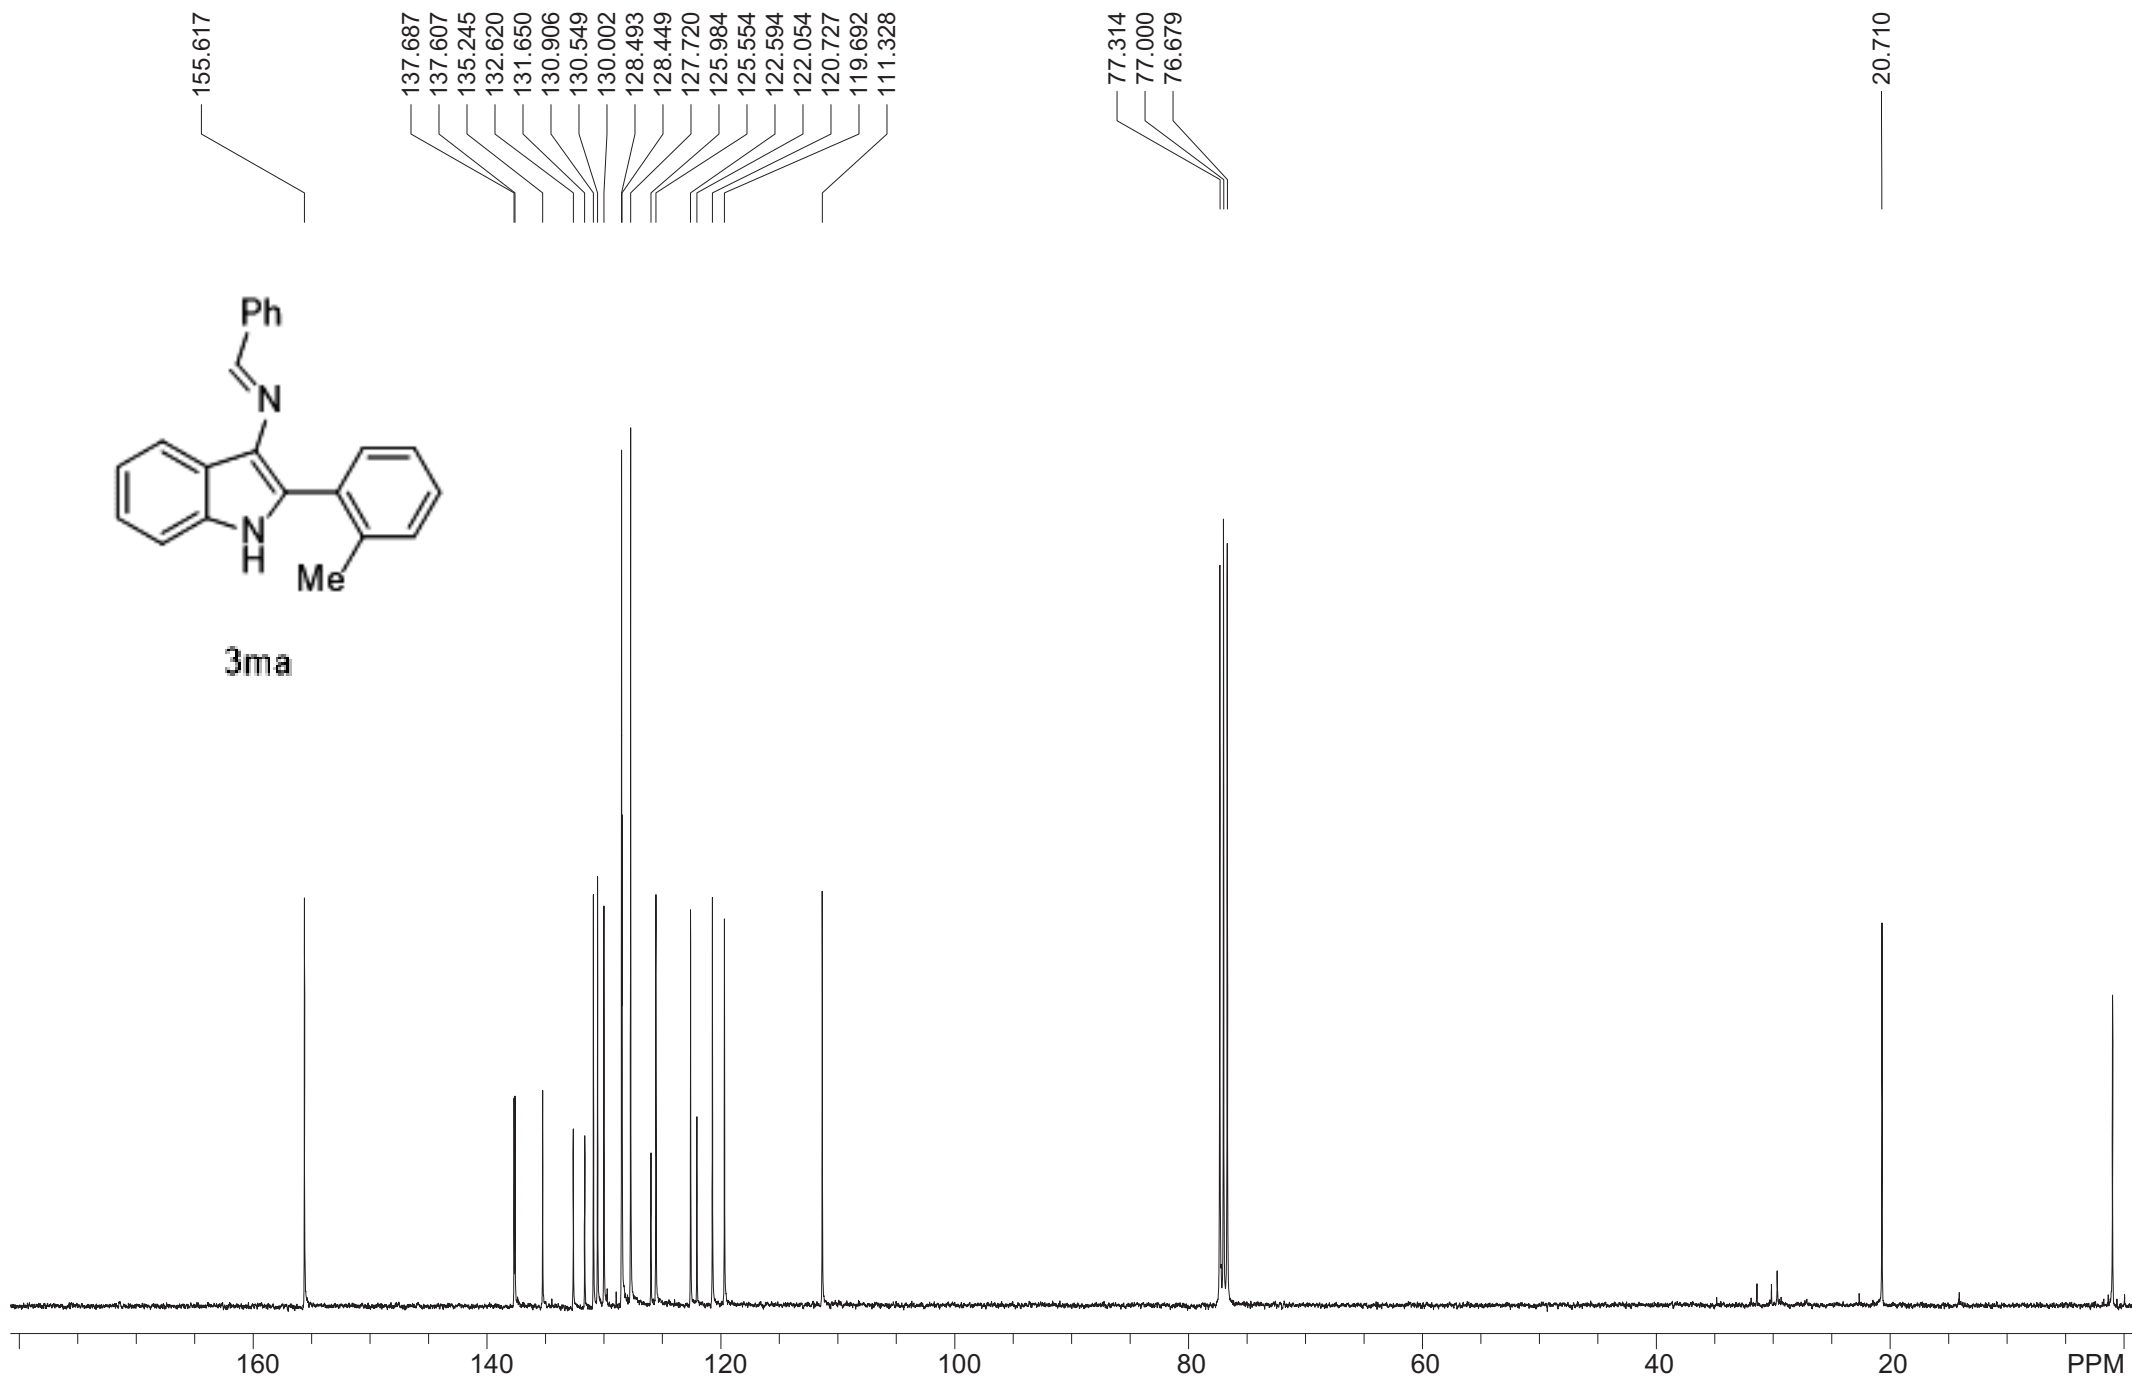

-0.000

9.011  
8.489  
7.993  
7.973  
7.820  
7.806  
7.699  
7.675  
7.652  
7.382  
7.358  
7.338  
7.314  
7.276  
7.258  
7.238  
7.226  
7.207  
7.189

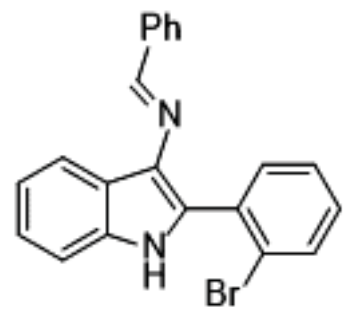

3na

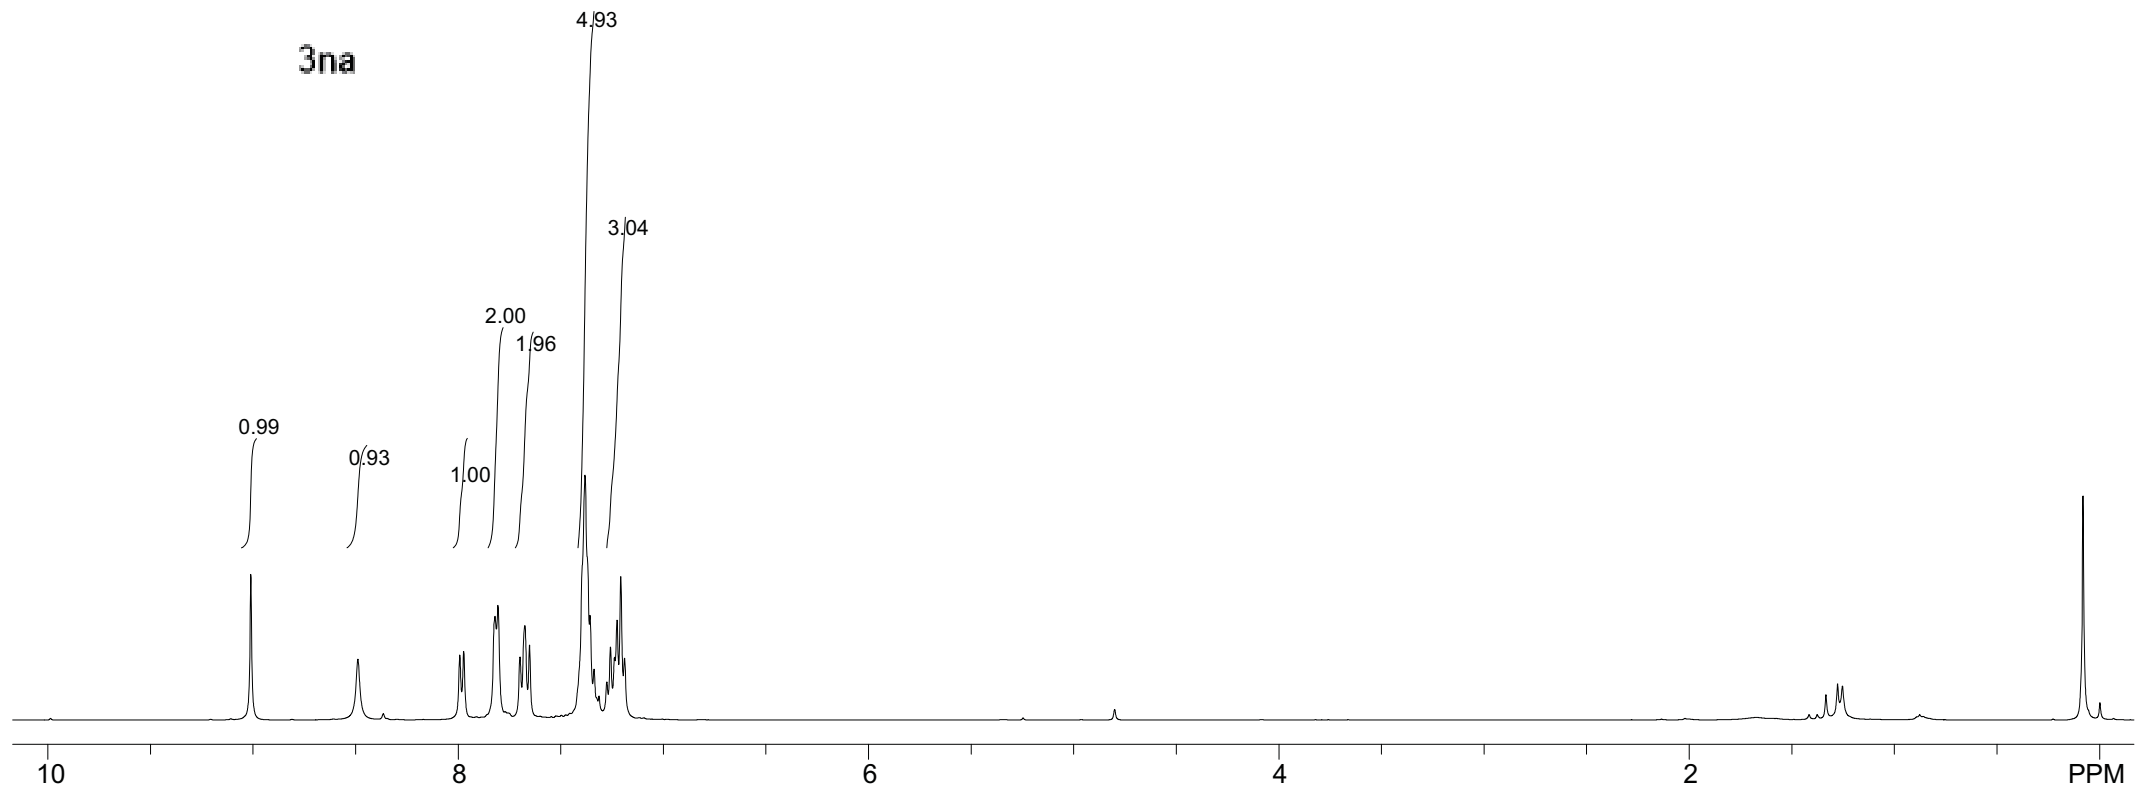

156.514  
137.665  
134.931  
134.348  
133.393  
132.372  
130.768  
130.155  
129.499  
128.551  
127.909  
127.005  
126.662  
123.184  
122.550  
121.238  
120.837  
119.911  
111.562

77.321  
77.000  
76.679

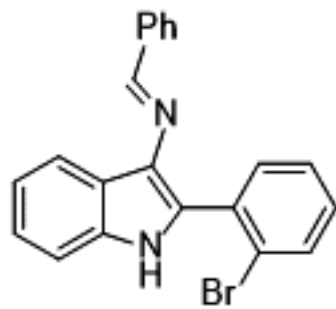

3na

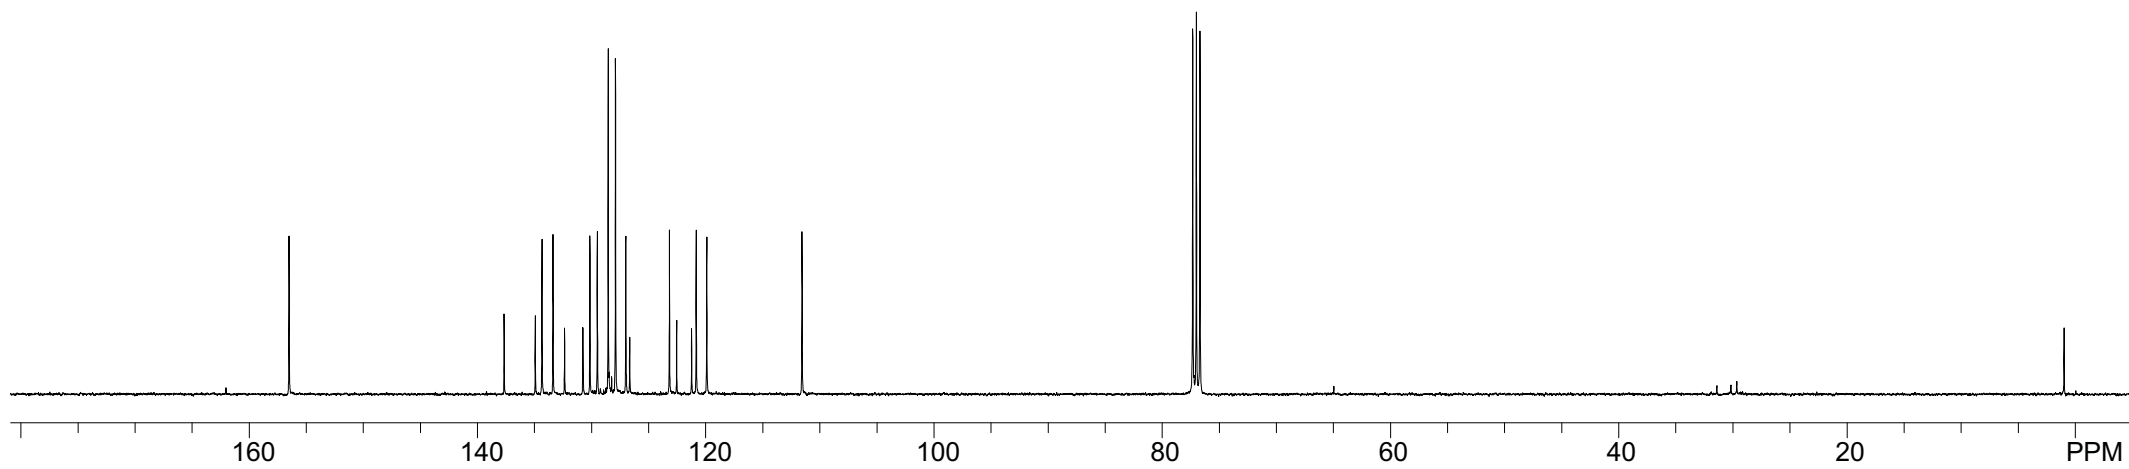

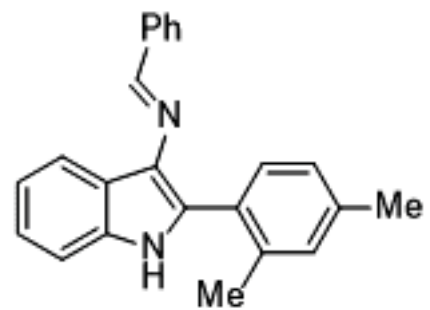

30a

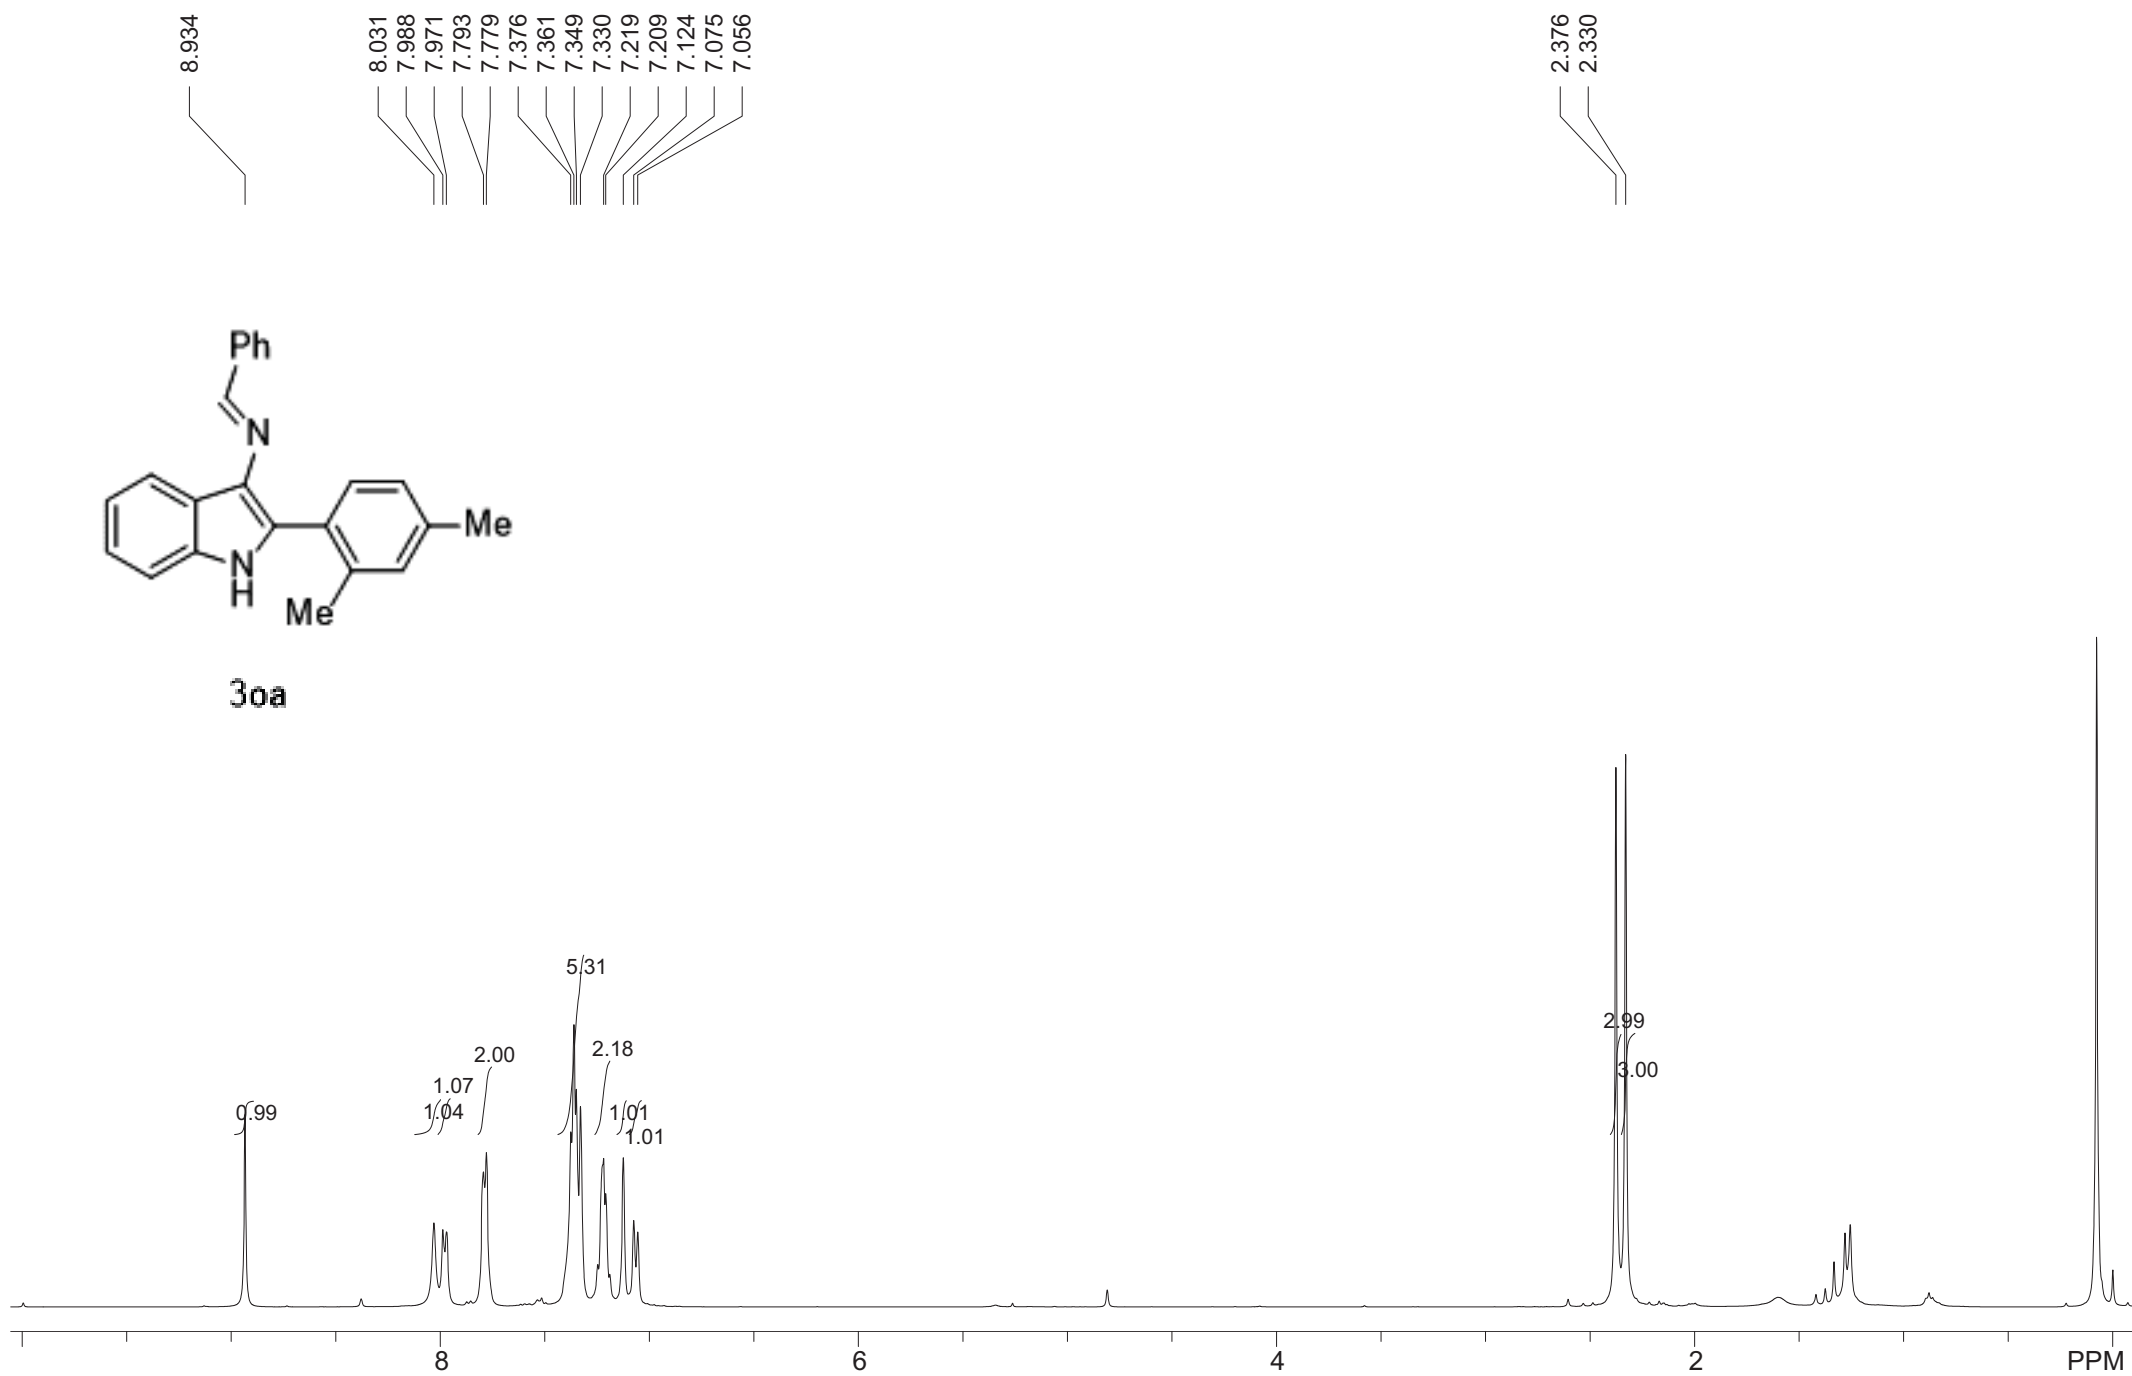

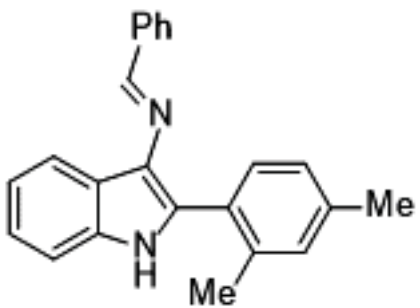

3oa

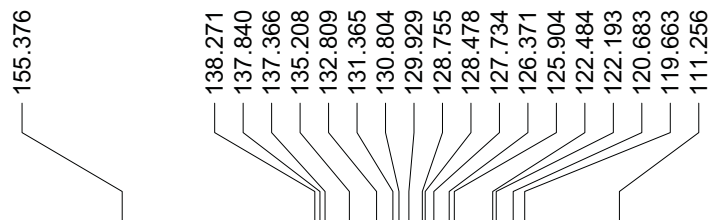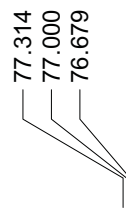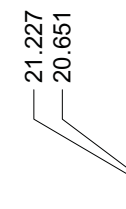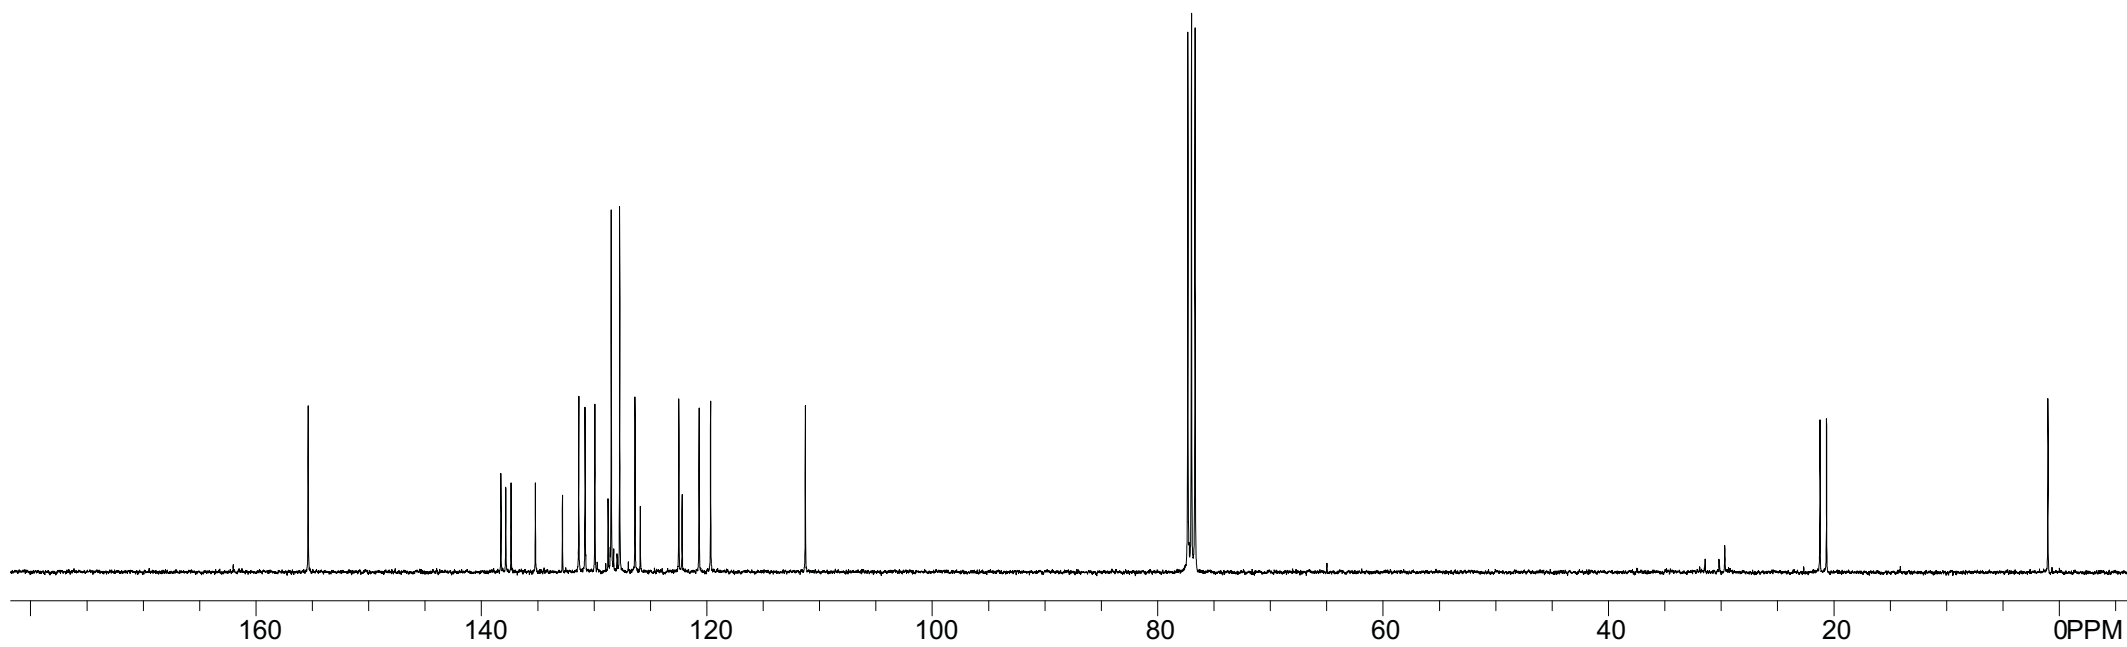



9.046  
 8.216  
 8.203  
 8.030  
 8.009  
 7.916  
 7.899  
 7.889  
 7.869  
 7.793  
 7.773  
 7.749  
 7.430  
 7.423  
 7.413  
 7.394  
 7.262  
 7.245  
 7.196  
 7.180  
 7.165  
 7.151  
 7.133

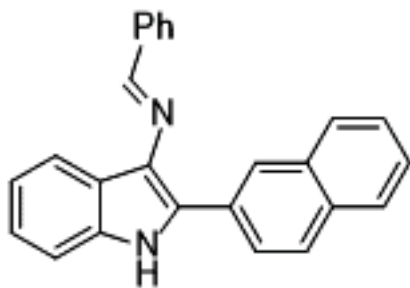

3pa

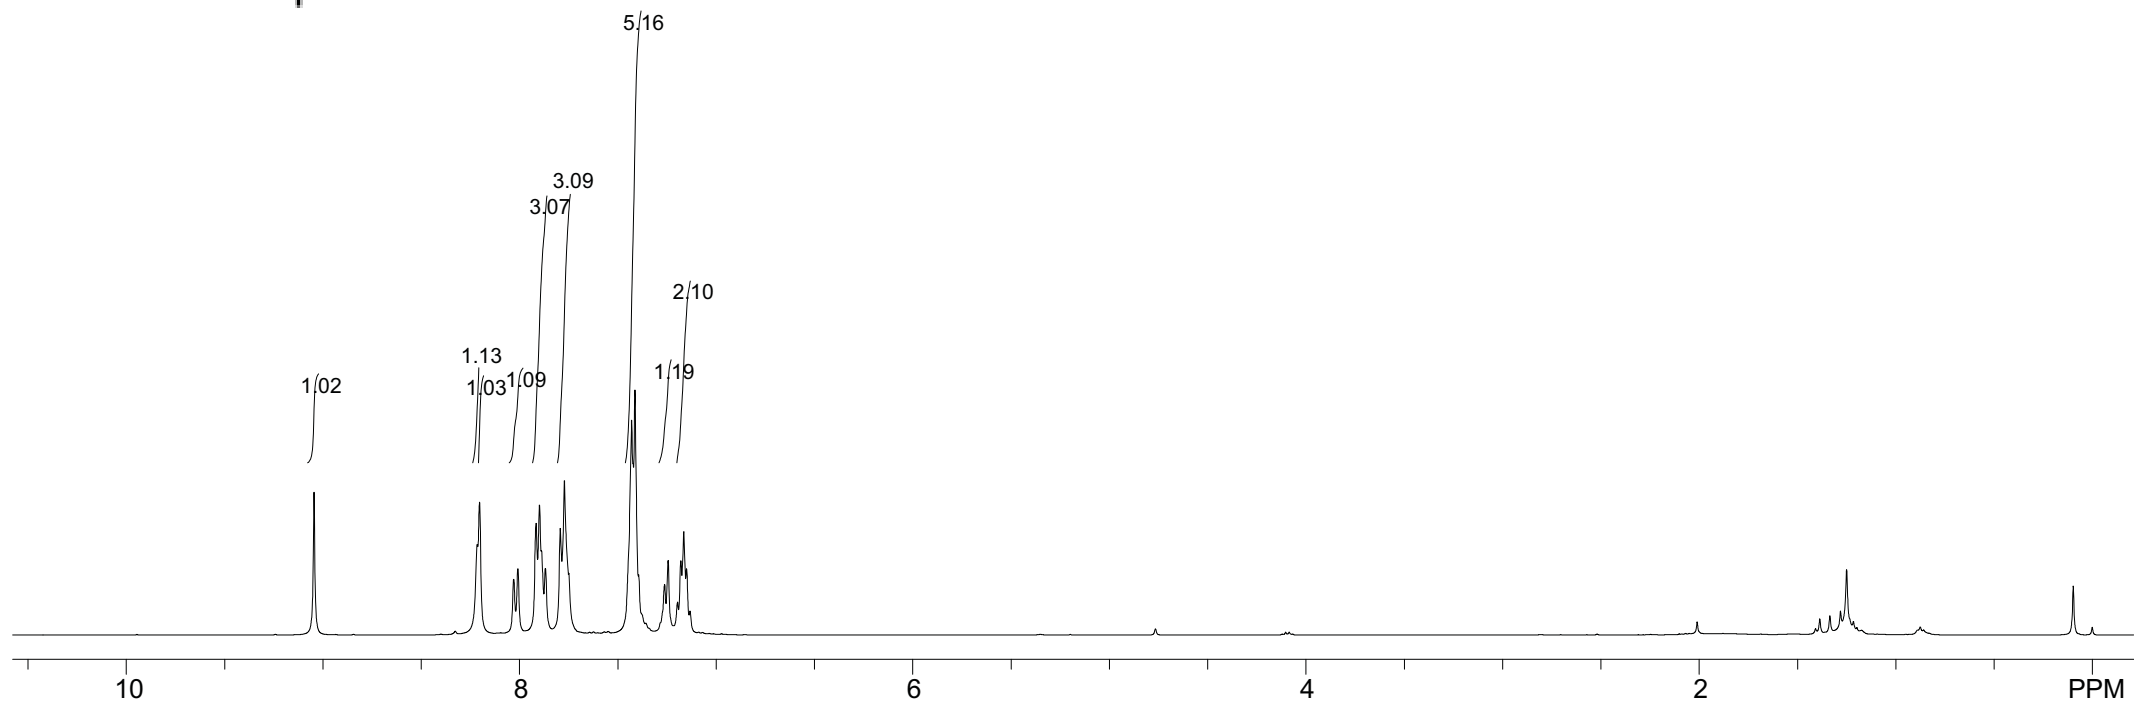

0.000

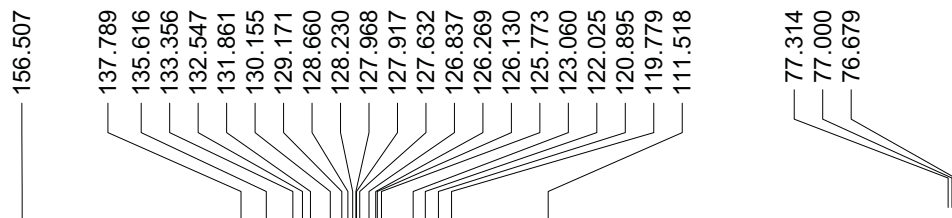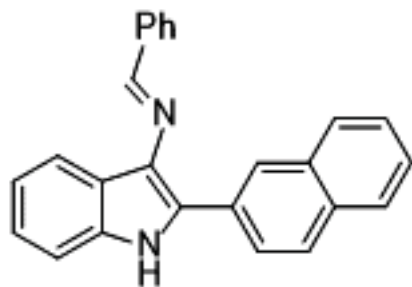

3pa

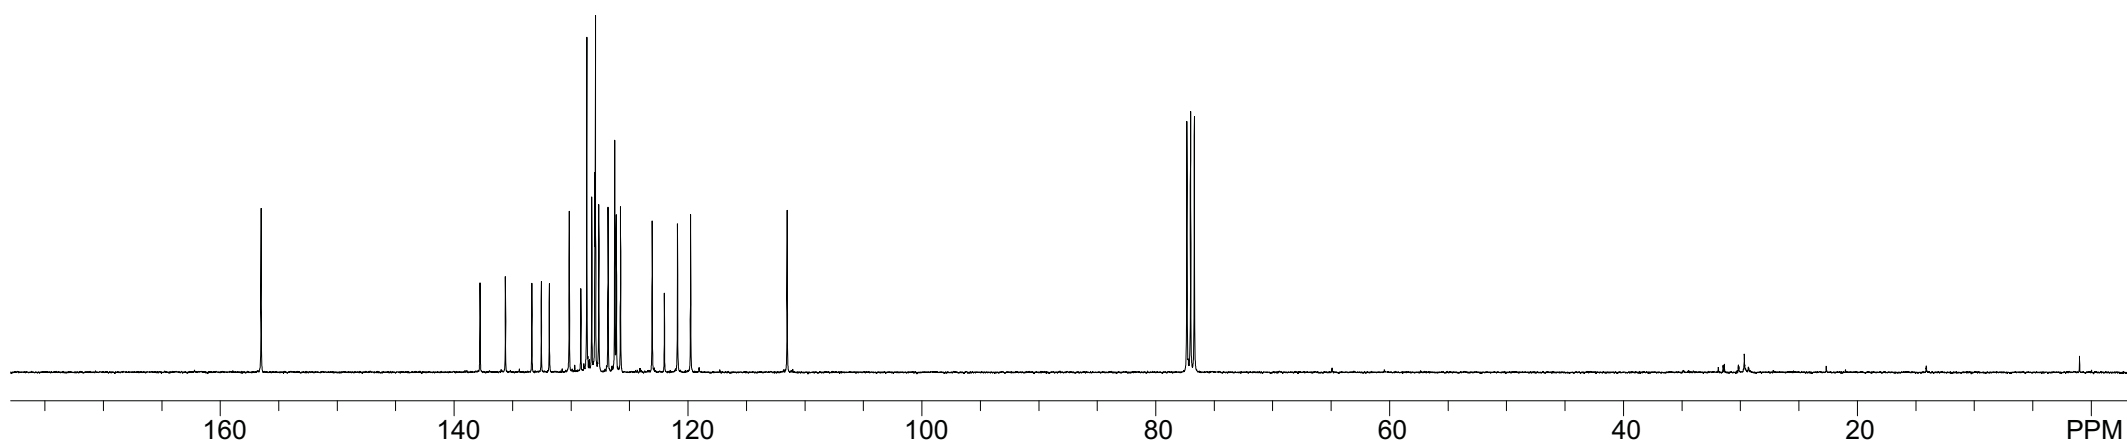

9.052  
8.170  
7.937  
7.917  
7.891  
7.471  
7.452  
7.434  
7.385  
7.347  
7.328  
7.310  
7.290  
7.268  
7.242  
6.918  
6.915  
6.897

3.879

0.000

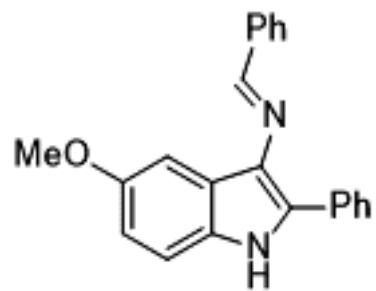

3qa

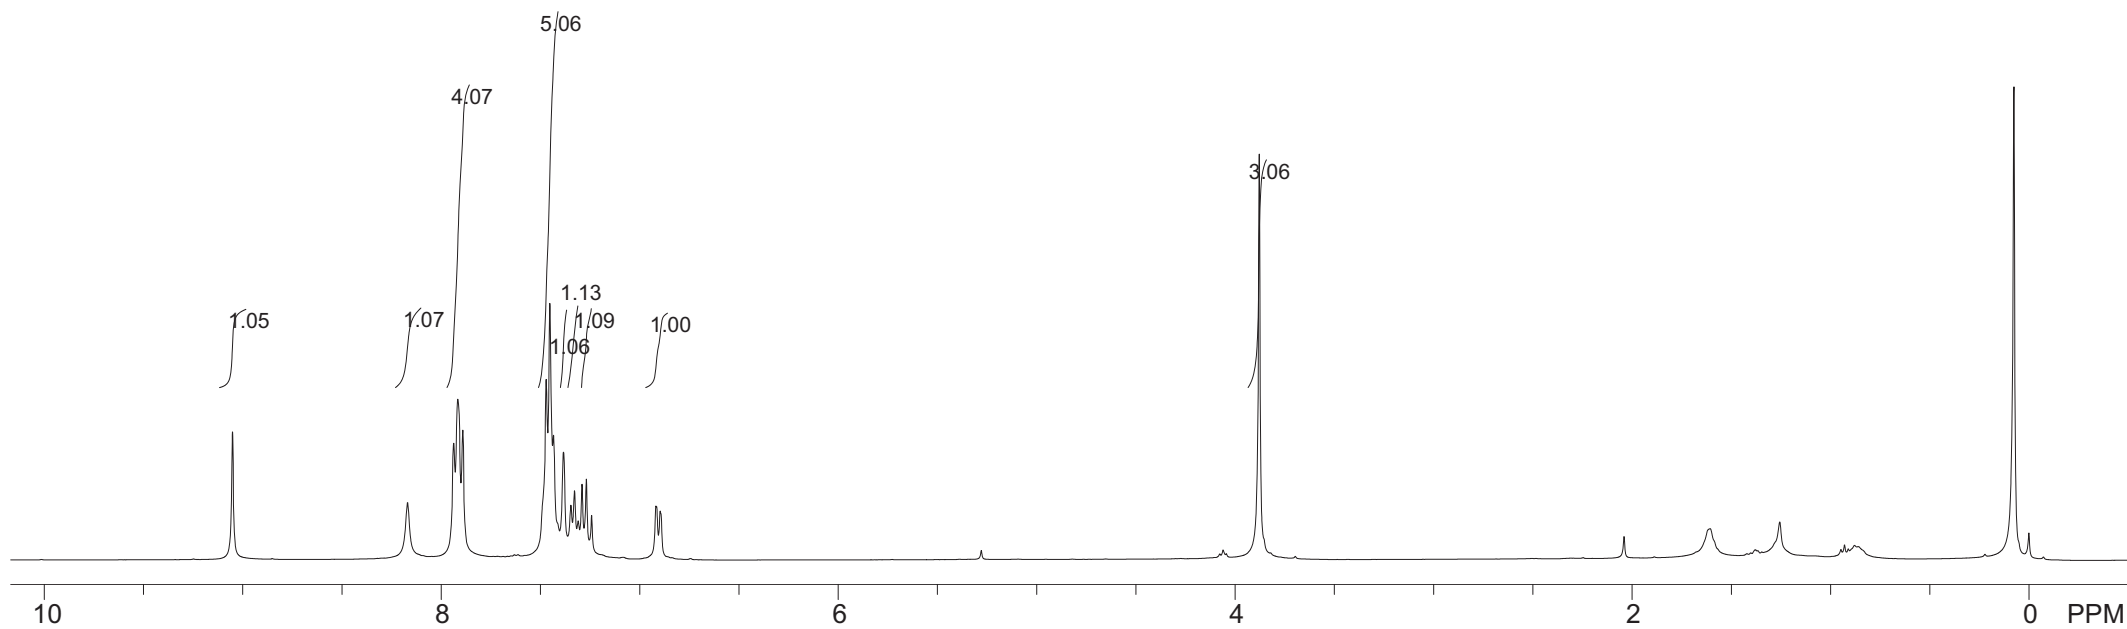

156.157  
155.026  
137.775  
132.678  
131.839  
130.709  
130.177  
128.668  
128.595  
127.924  
127.858  
127.545  
125.846  
122.375  
112.444  
112.138  
102.528  
77.321  
77.000  
76.687  
56.073

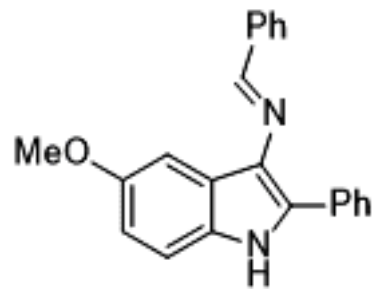

3qa

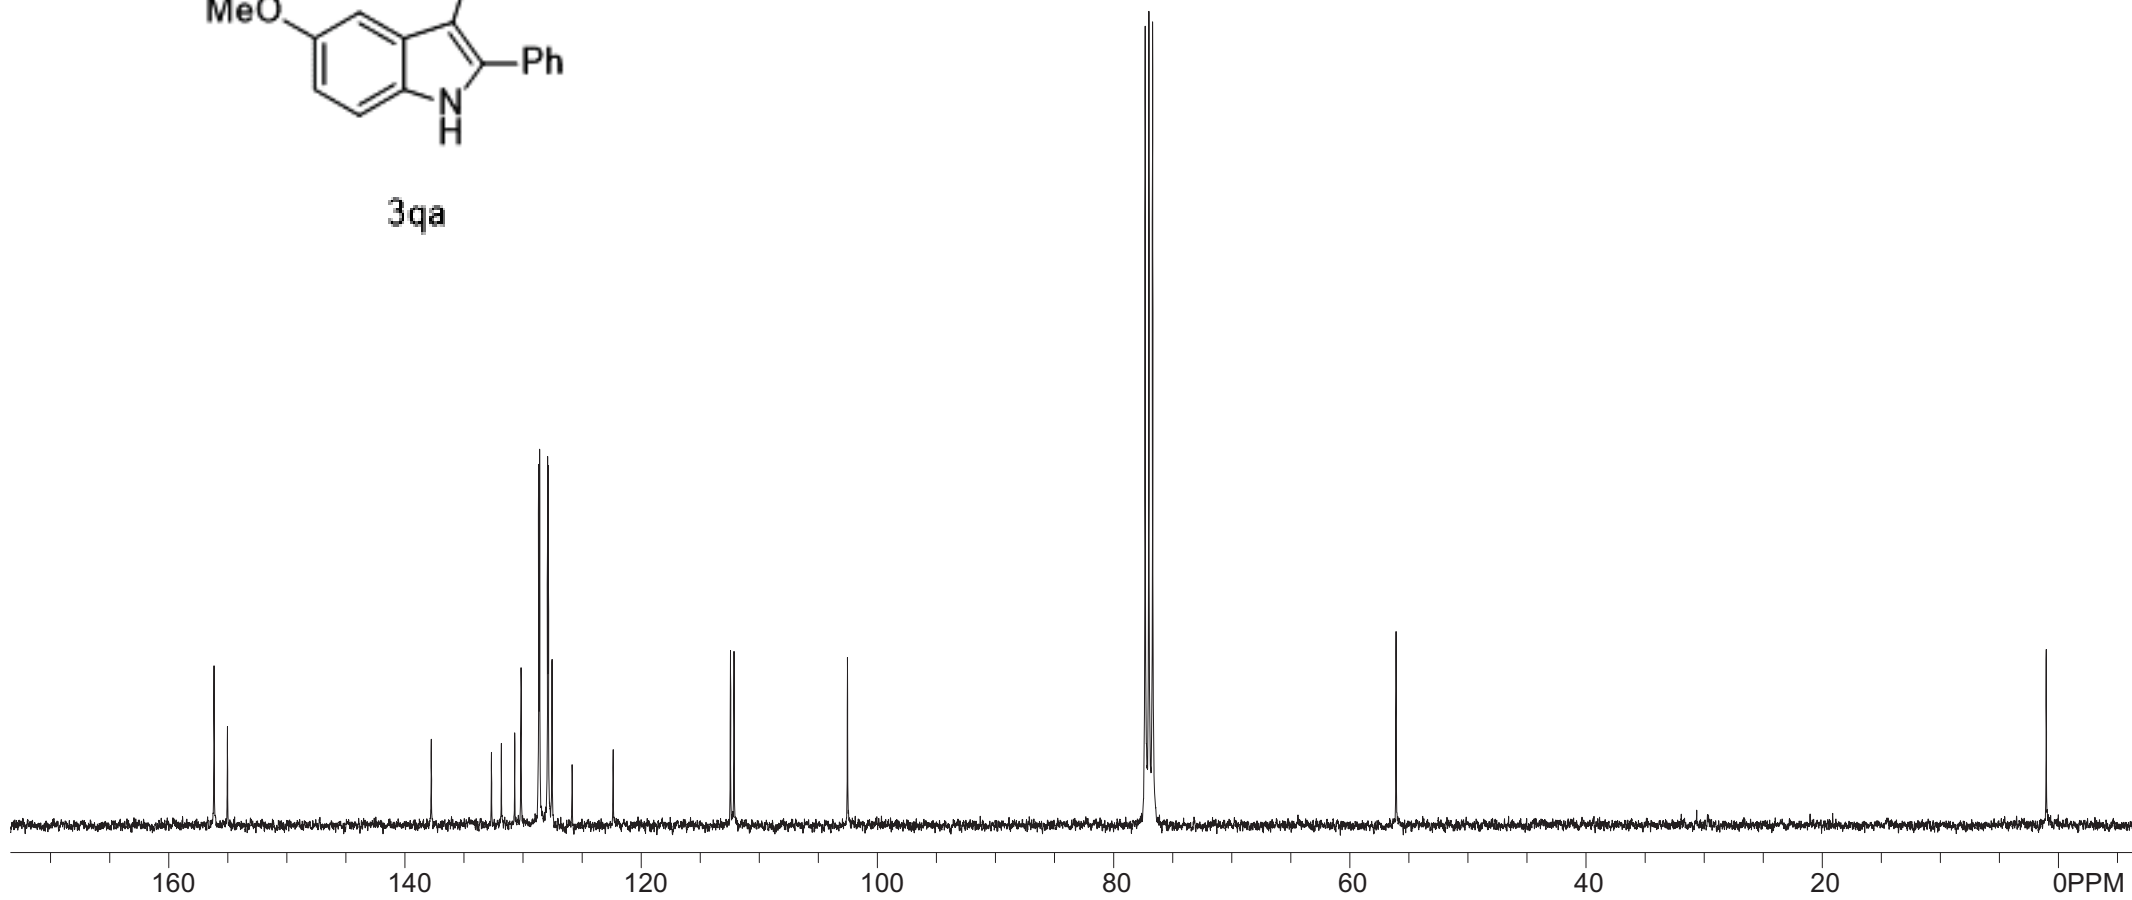

9.079  
7.937  
7.919  
8.095  
7.884  
7.864  
7.688  
7.466  
7.449  
7.425  
7.407  
7.322  
7.303  
7.285  
7.224  
7.204  
7.045  
7.025

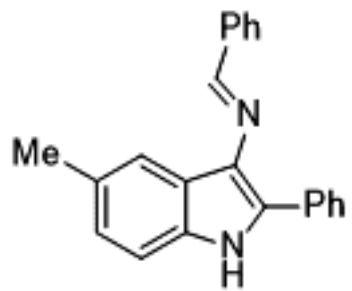

3ra

2.470

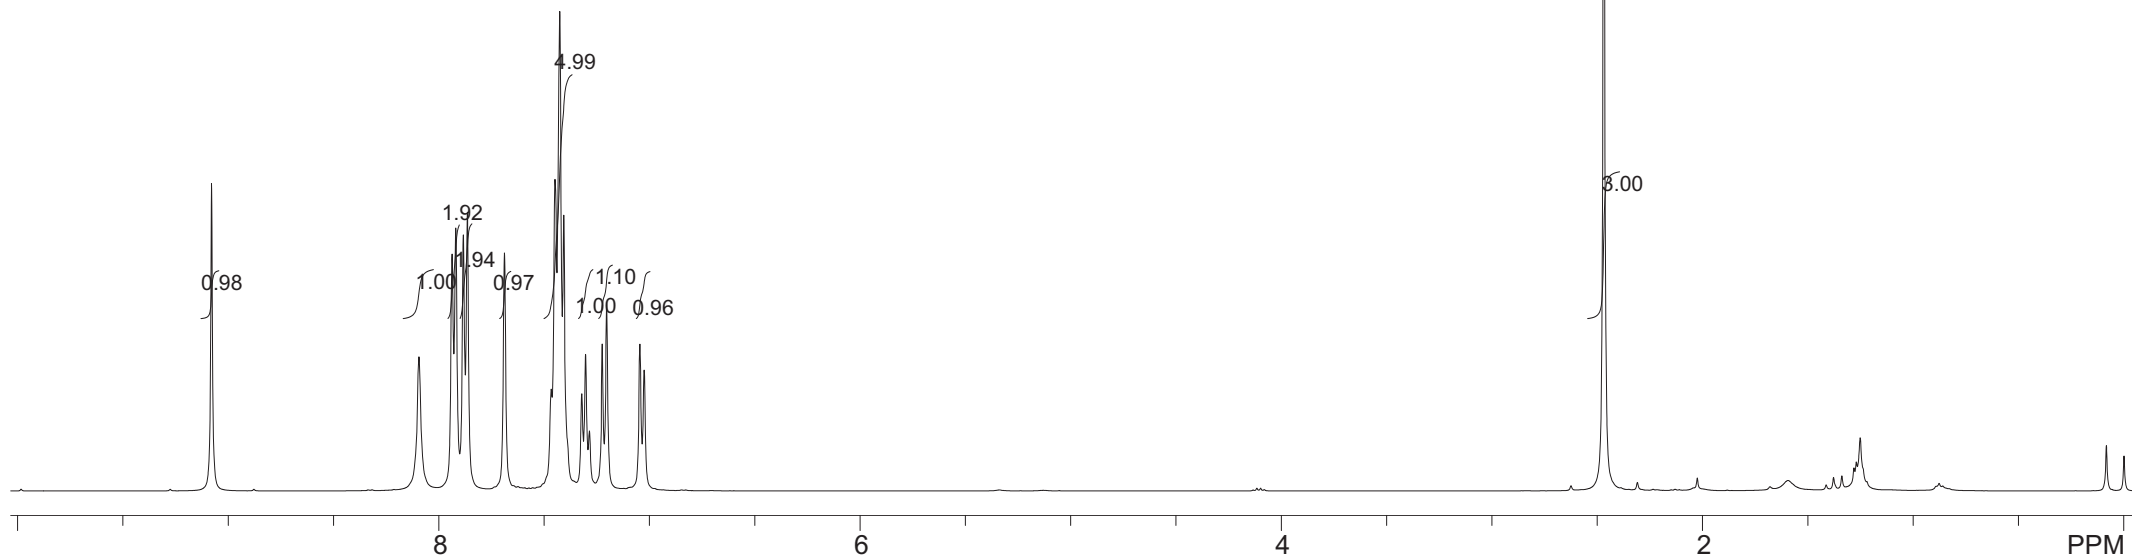

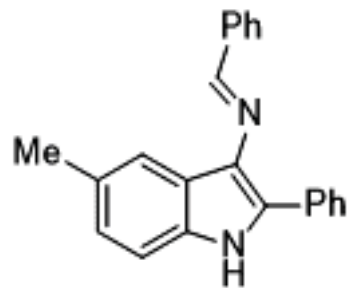

3ra

156.229  
133.815  
137.848  
132.102  
131.854  
130.235  
130.075  
128.624  
128.522  
127.924  
127.902  
127.443  
125.554  
124.577  
122.193  
119.458  
111.161

77.321  
77.000  
76.686

21.373

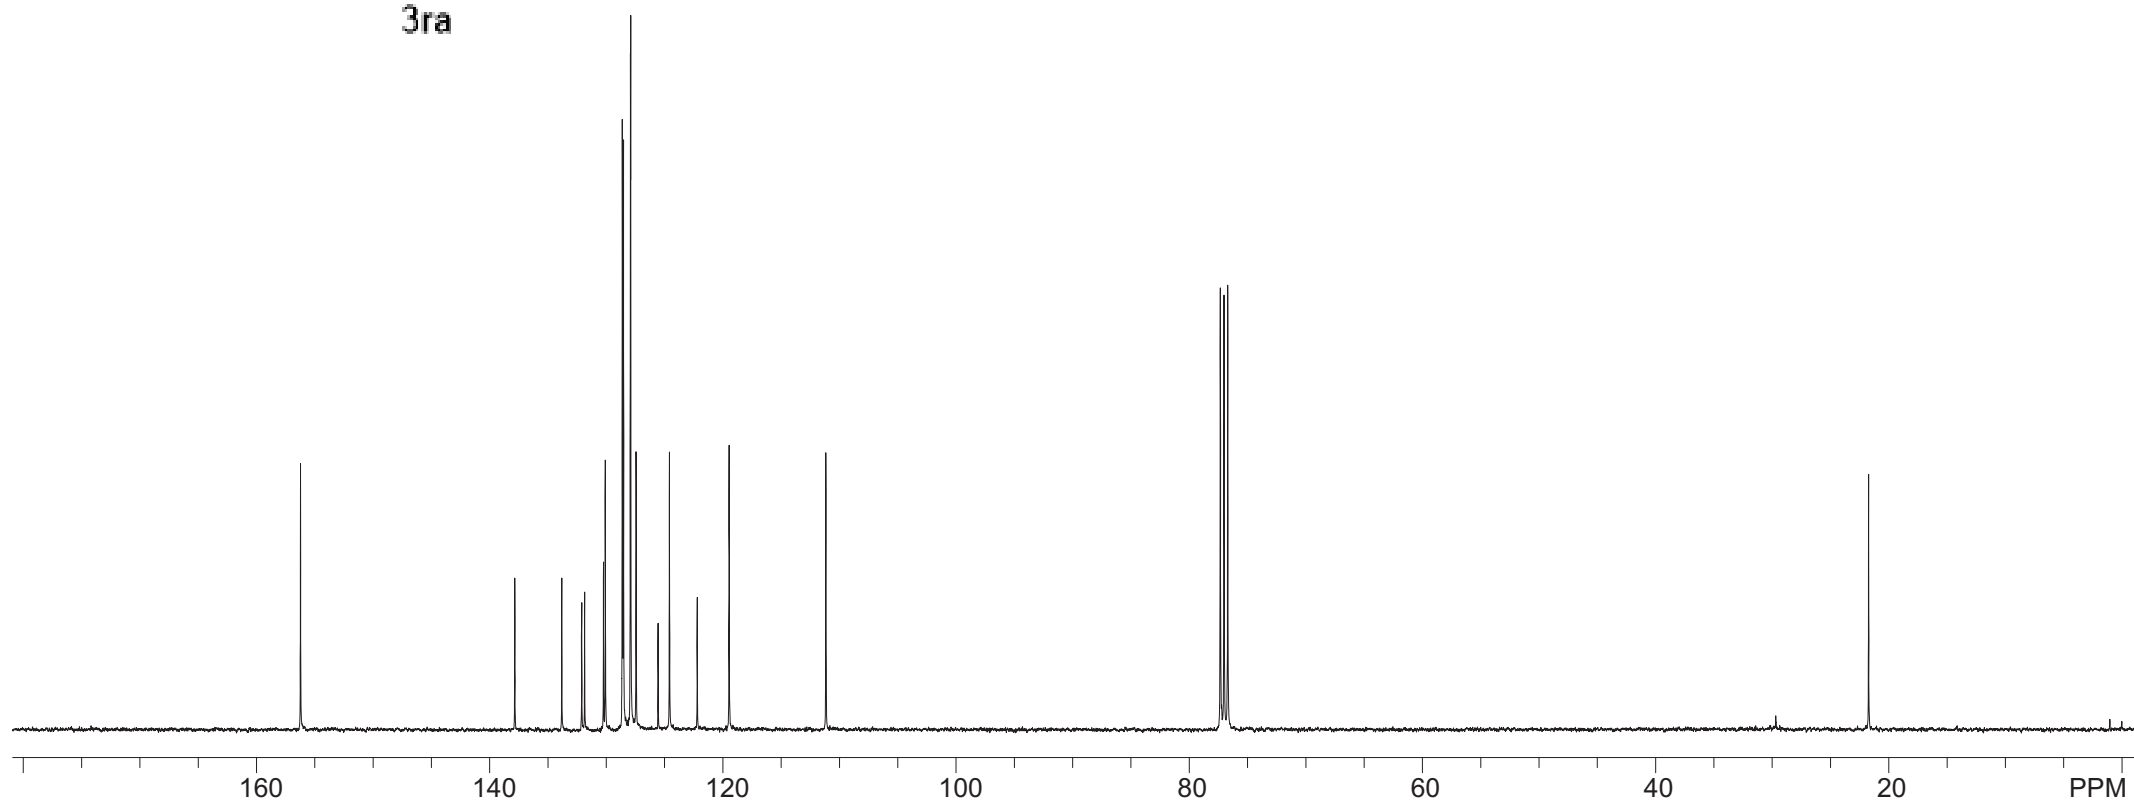

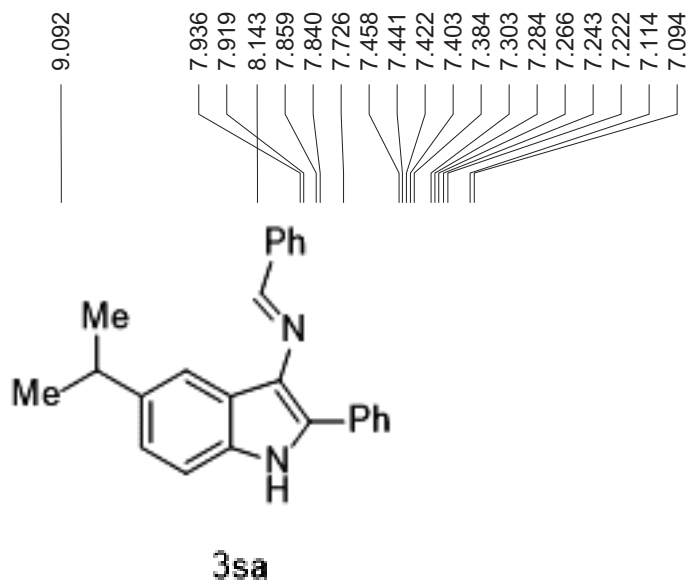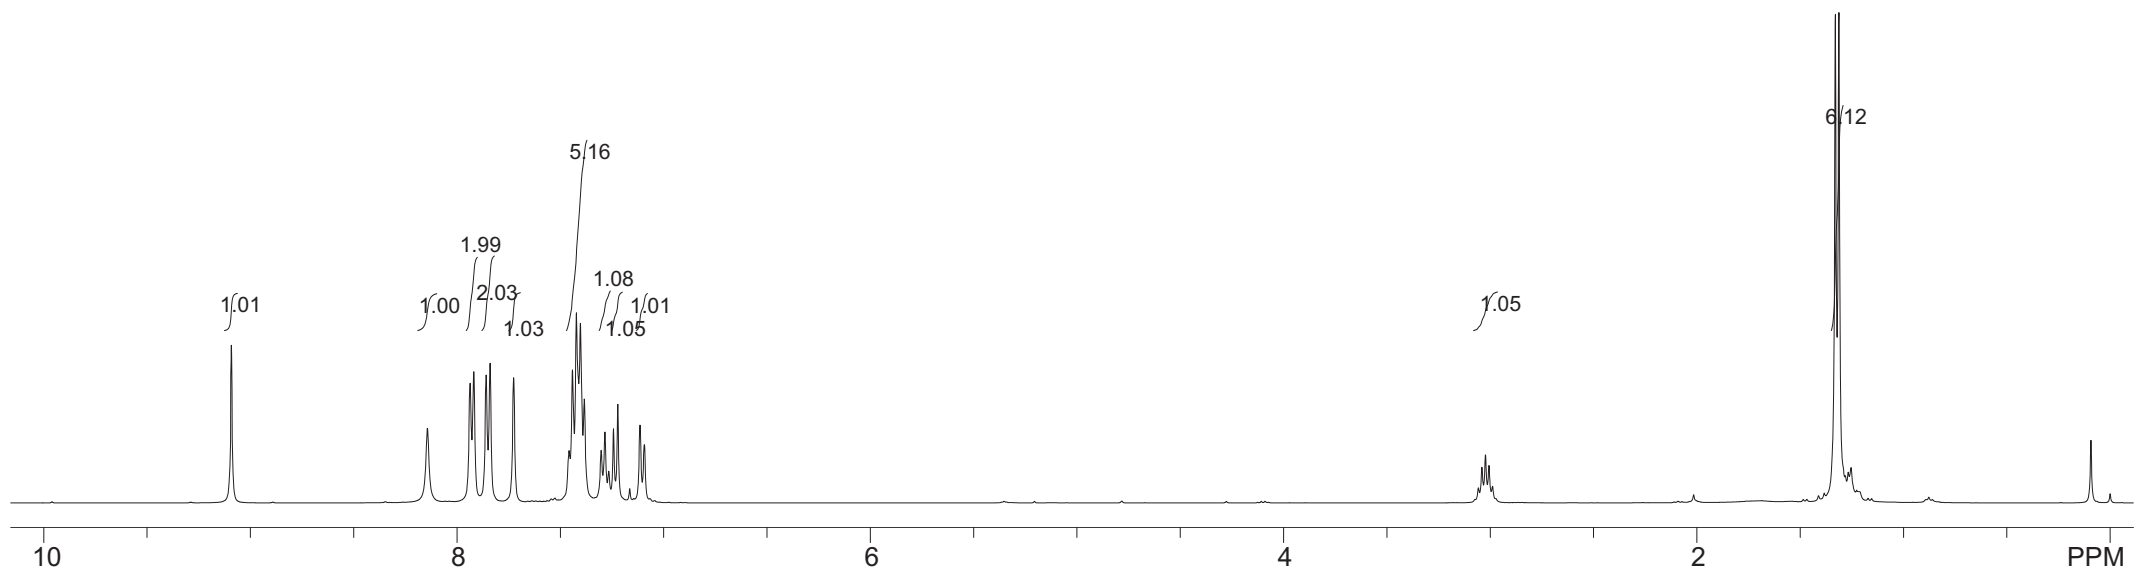

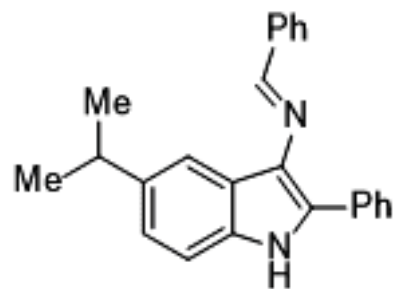

3sa

156.332  
141.705  
137.848  
134.093  
132.073  
131.927  
130.082  
128.624  
128.507  
127.924  
127.392  
125.839  
122.127  
121.974  
116.819  
111.343

77.314  
77.000  
76.679

34.418

24.618

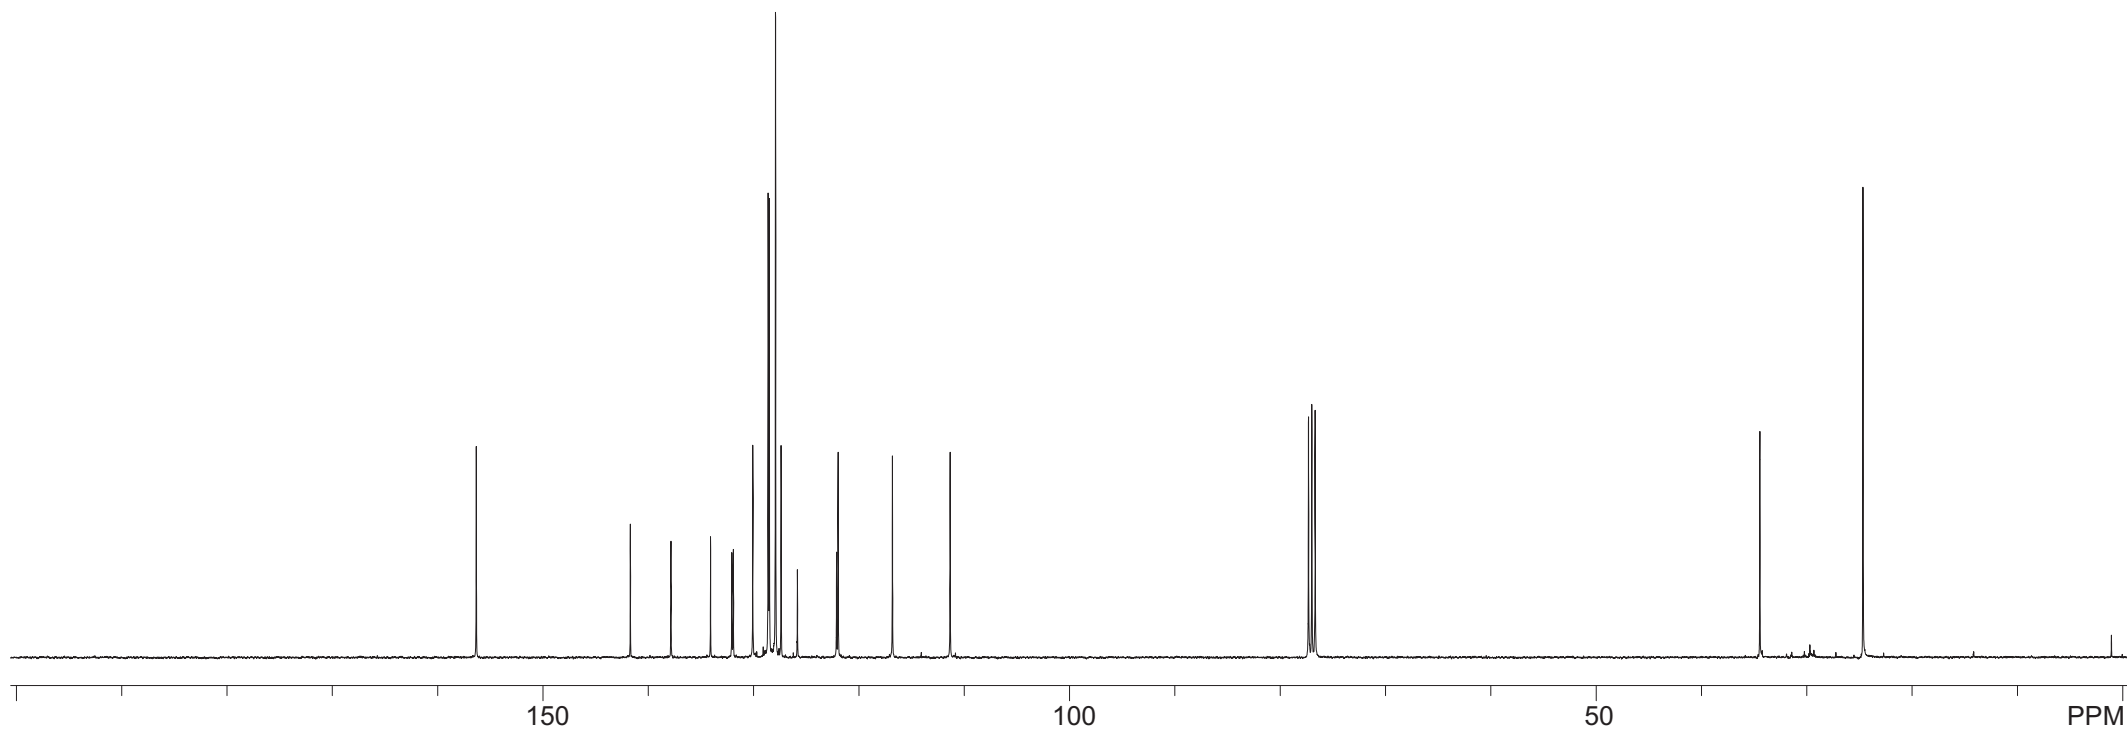



-0.000

8.972  
8.280  
7.916  
7.901  
7.851  
7.832  
7.460  
7.444  
7.430  
7.410  
7.347  
7.329  
7.311  
7.239  
7.229  
7.218  
7.163  
7.138

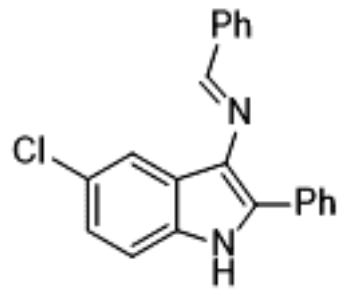

3ta

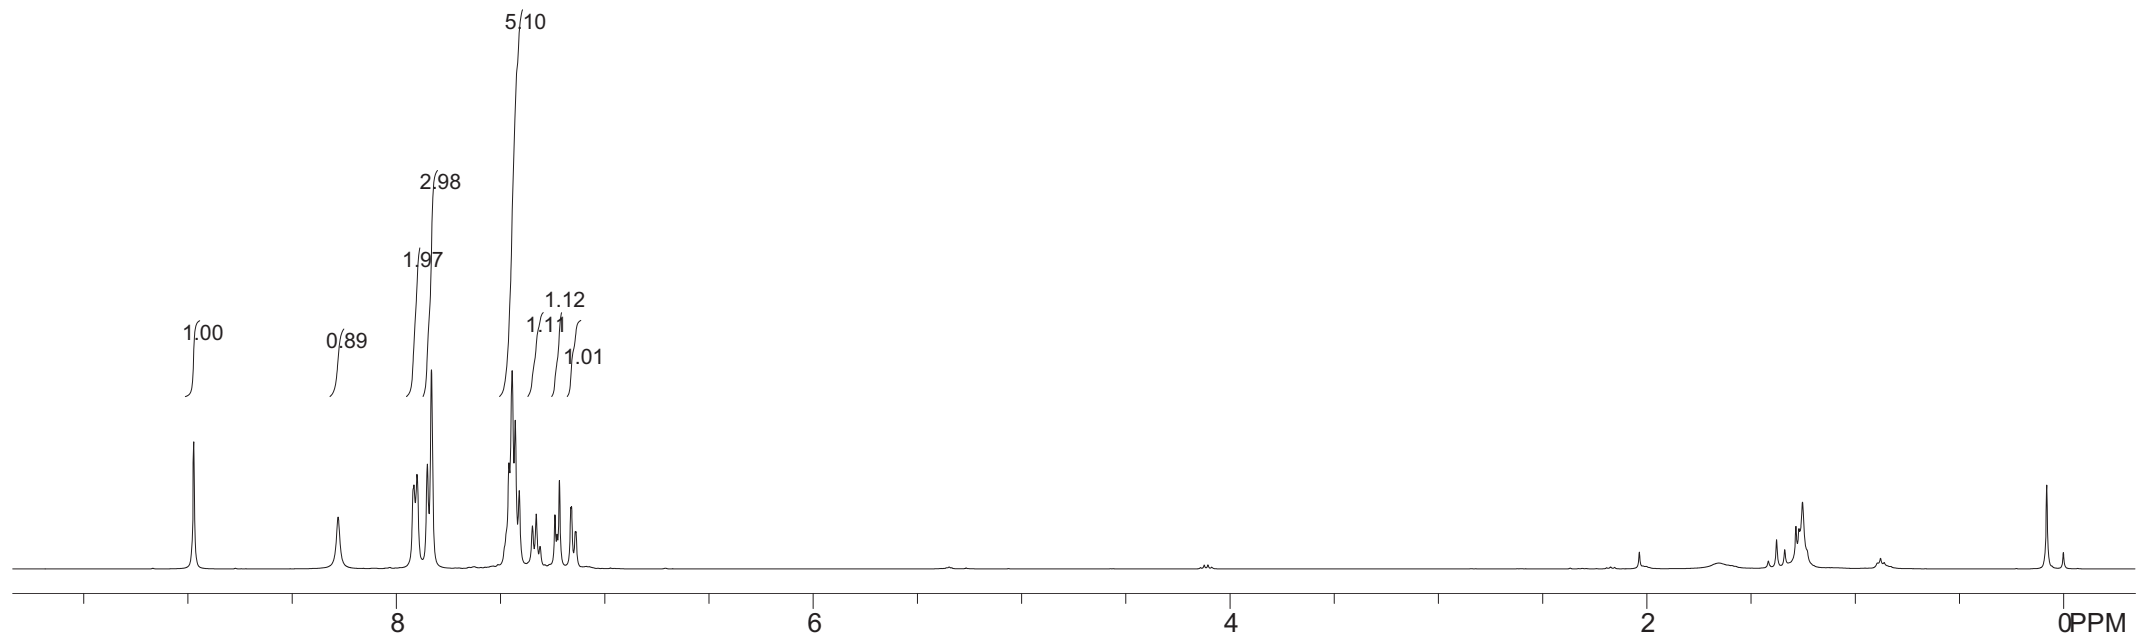

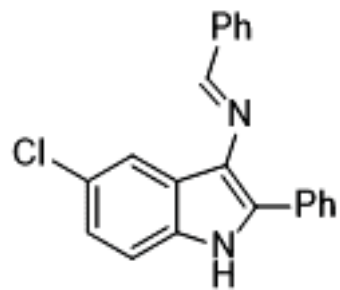

3la

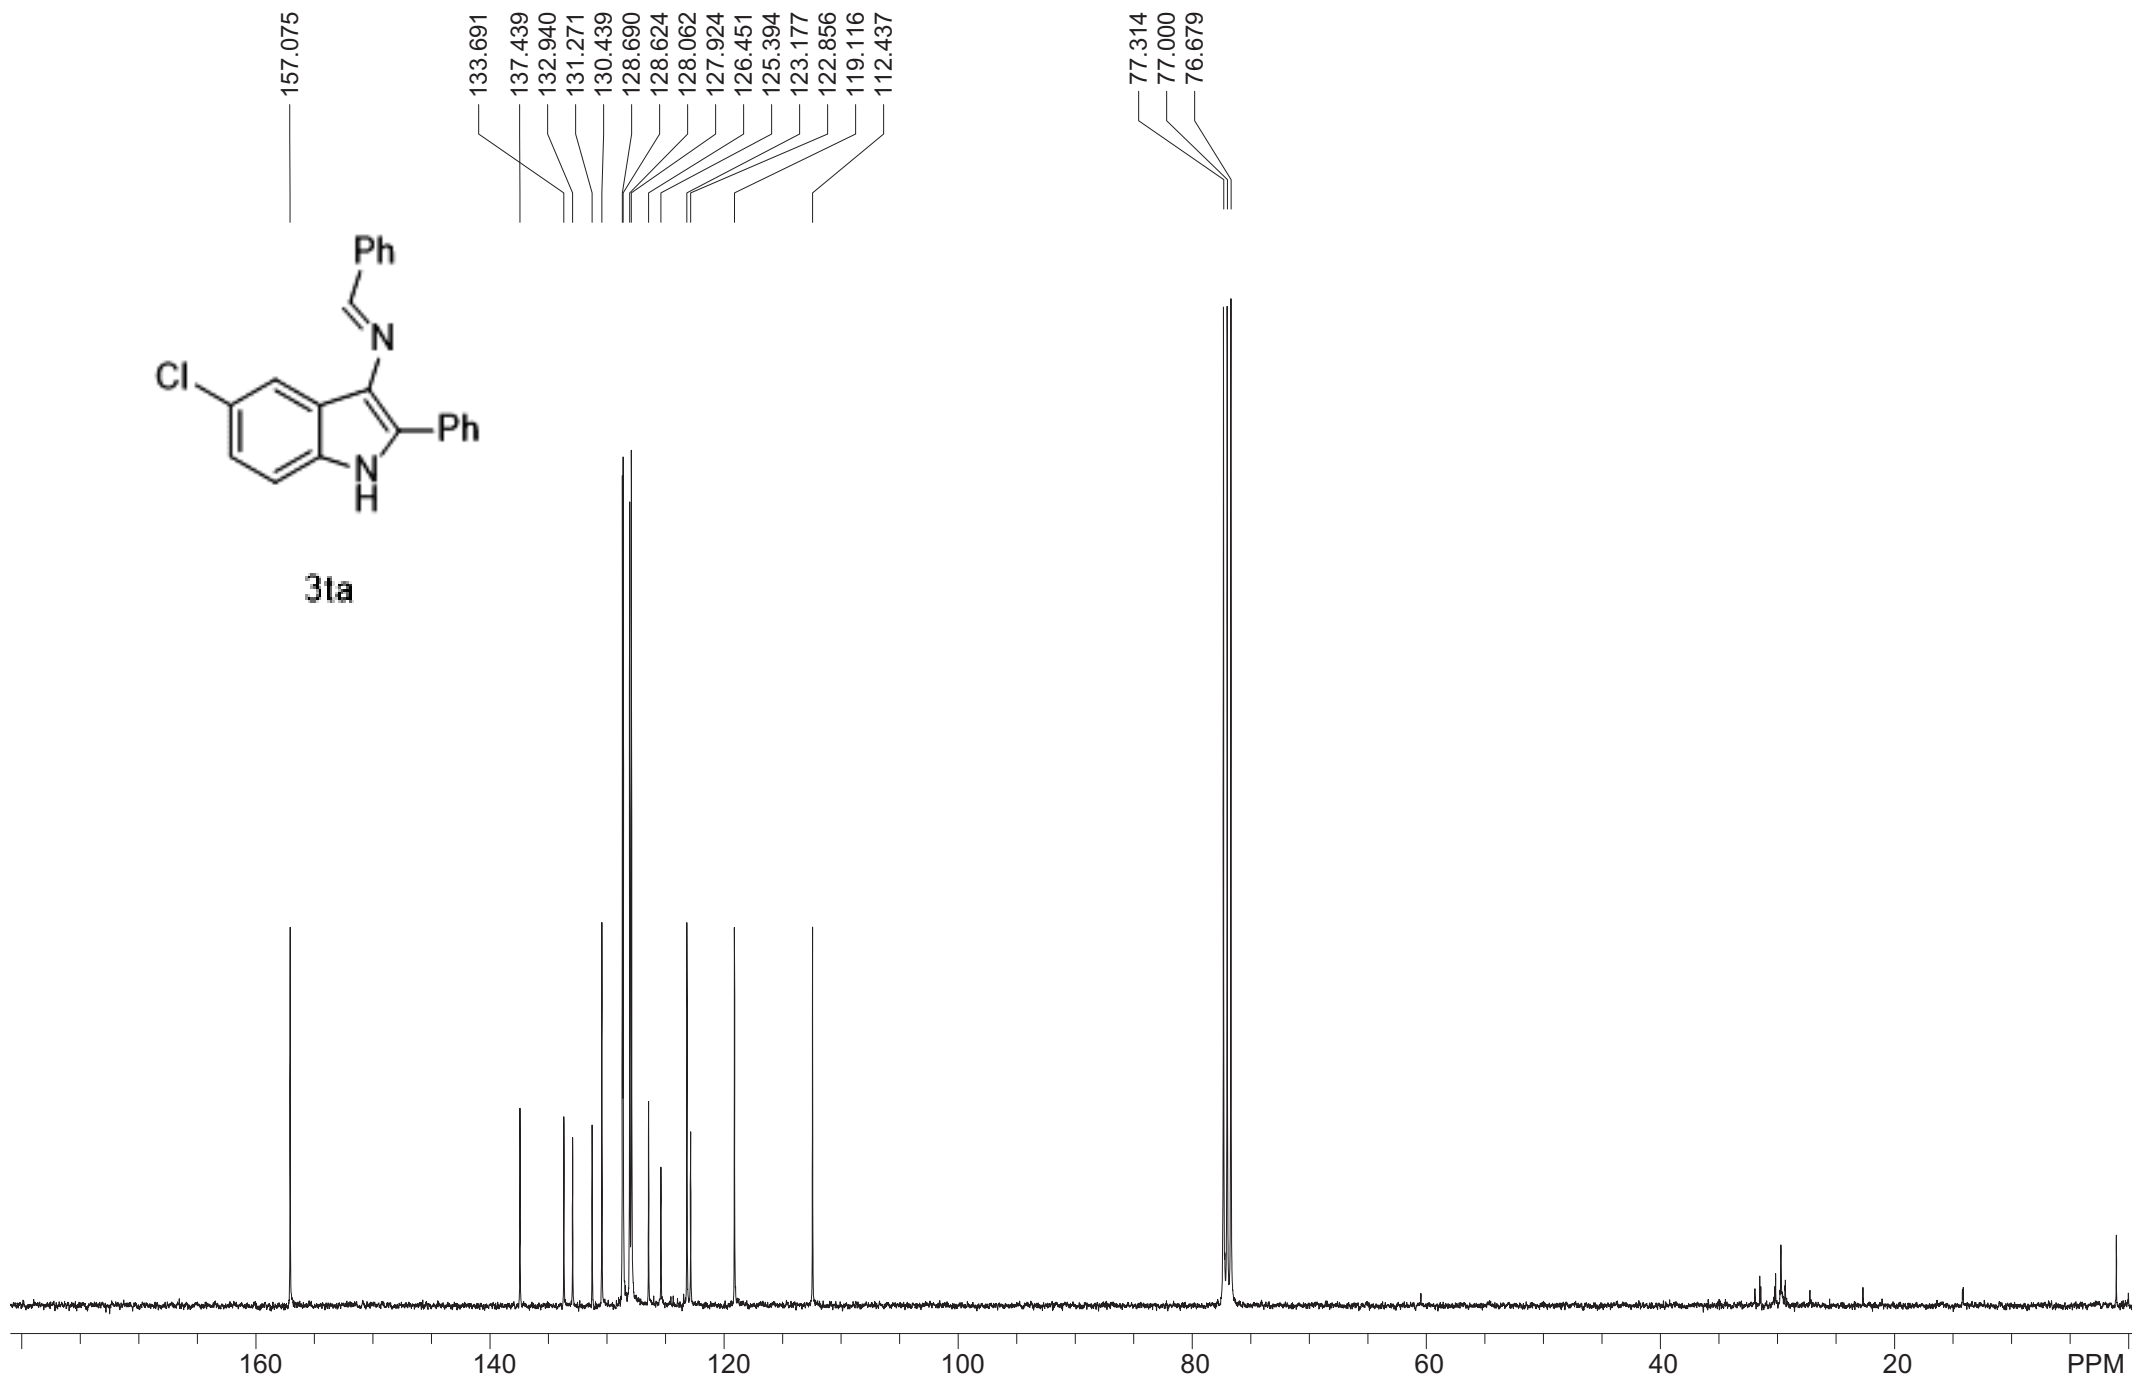

8.983  
 8.321  
 7.992  
 7.928  
 7.914  
 7.870  
 7.851  
 7.453  
 7.424  
 7.356  
 7.339  
 7.320  
 7.302  
 7.281  
 7.238  
 7.218  
 7.198

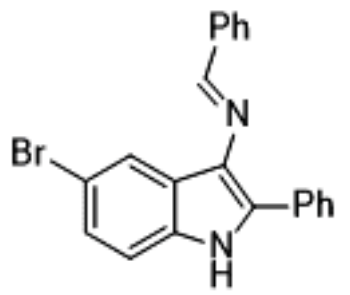

3ua

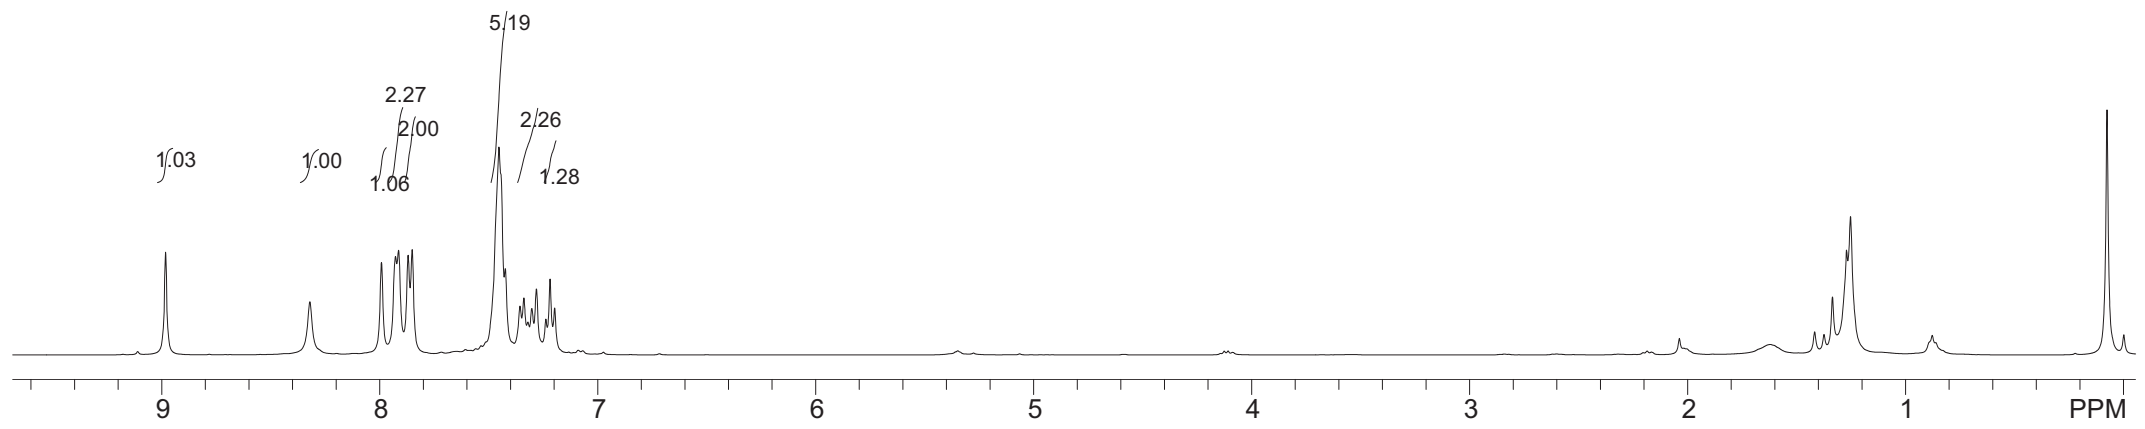

157.199

137.447  
133.976  
132.685  
131.256  
130.469  
128.704  
128.653  
128.099  
127.938  
125.780  
125.321  
123.542  
122.134  
114.012  
112.867

77.321  
77.000  
76.687

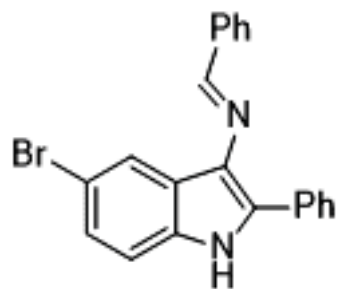

3ua

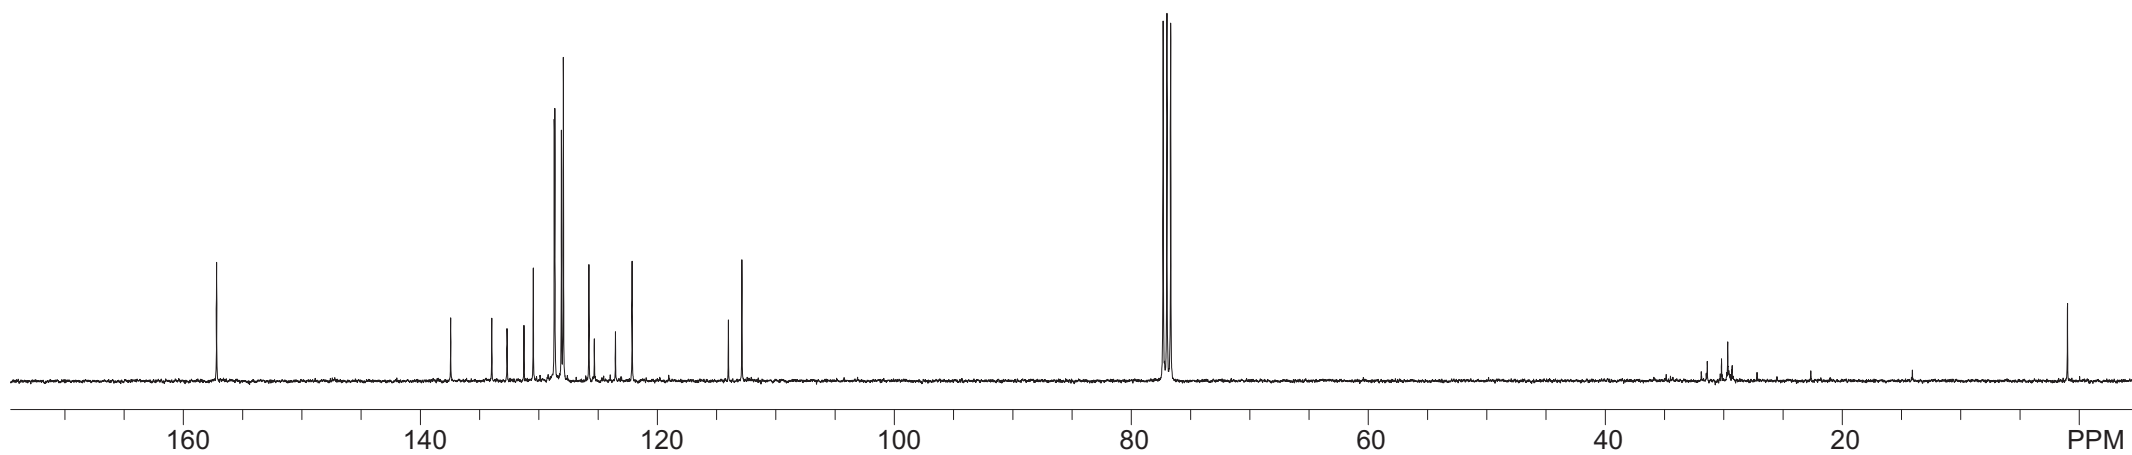

8.997  
 8.233  
 7.925  
 7.908  
 7.894  
 7.875  
 7.573  
 7.551  
 7.468  
 7.452  
 7.435  
 7.362  
 7.344  
 7.326  
 7.286  
 7.275  
 7.264  
 7.253  
 7.236  
 6.995  
 6.991  
 6.973  
 6.970  
 6.951

0.000

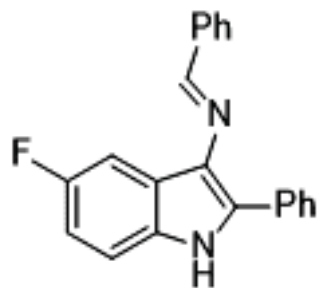

3va

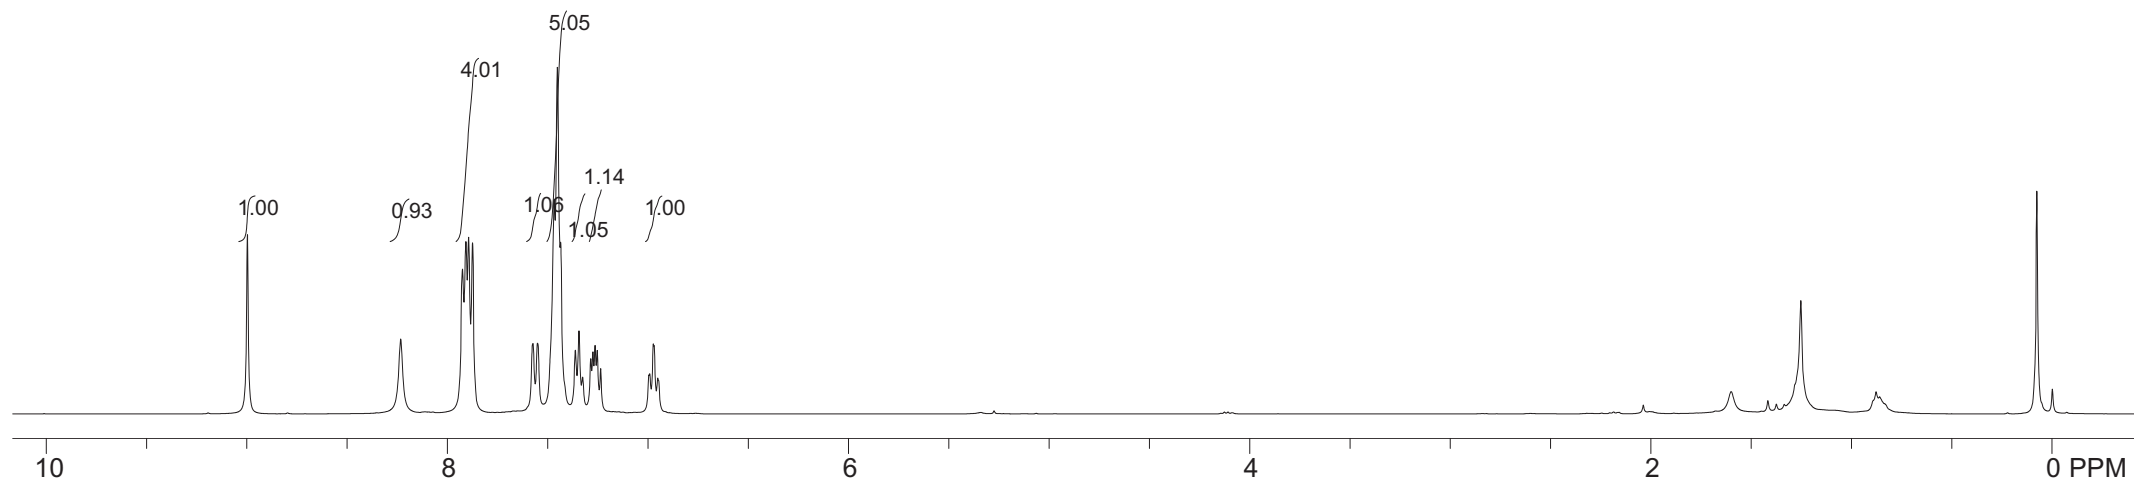

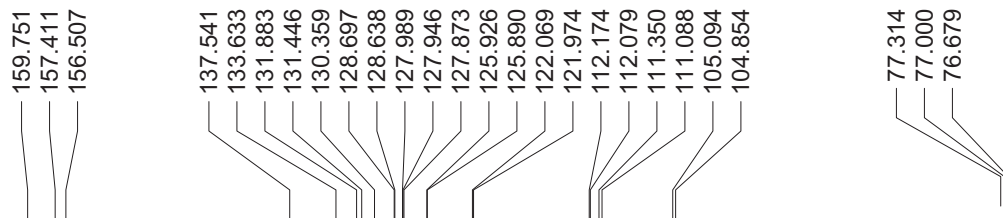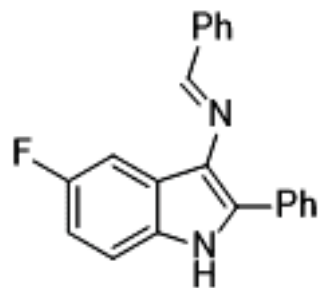

3va

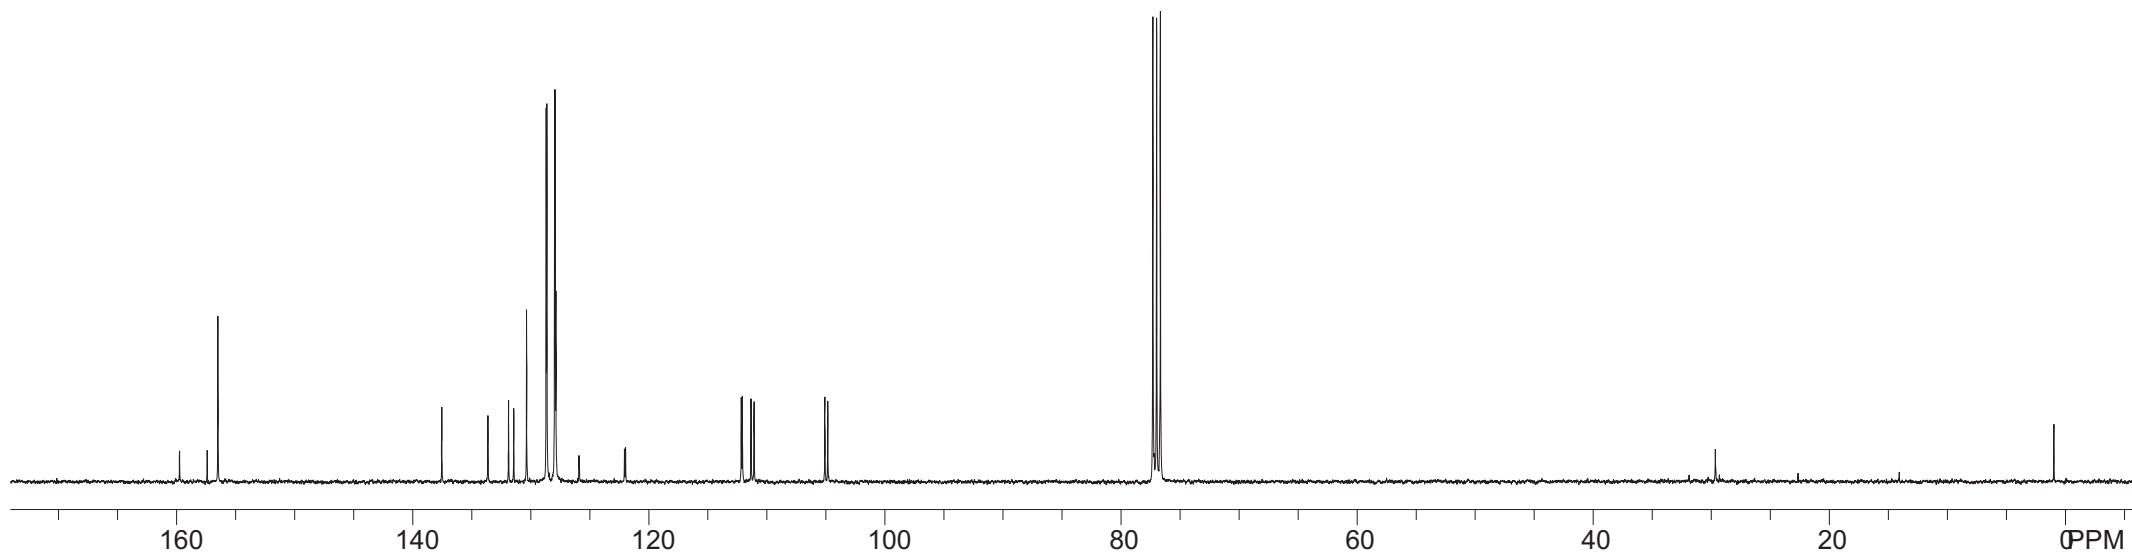

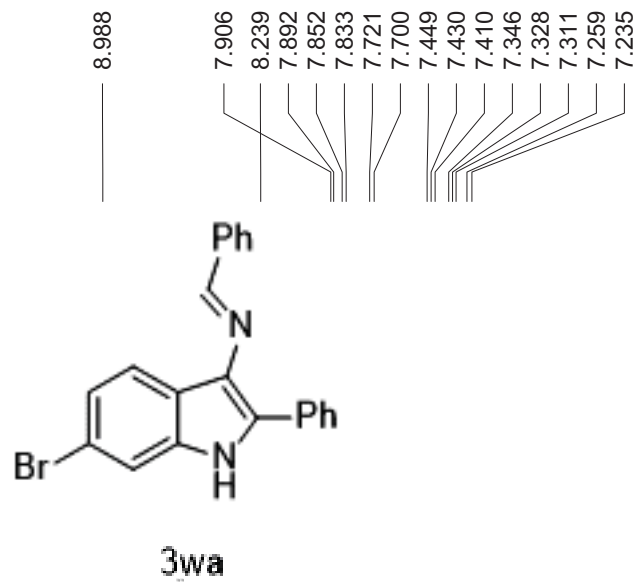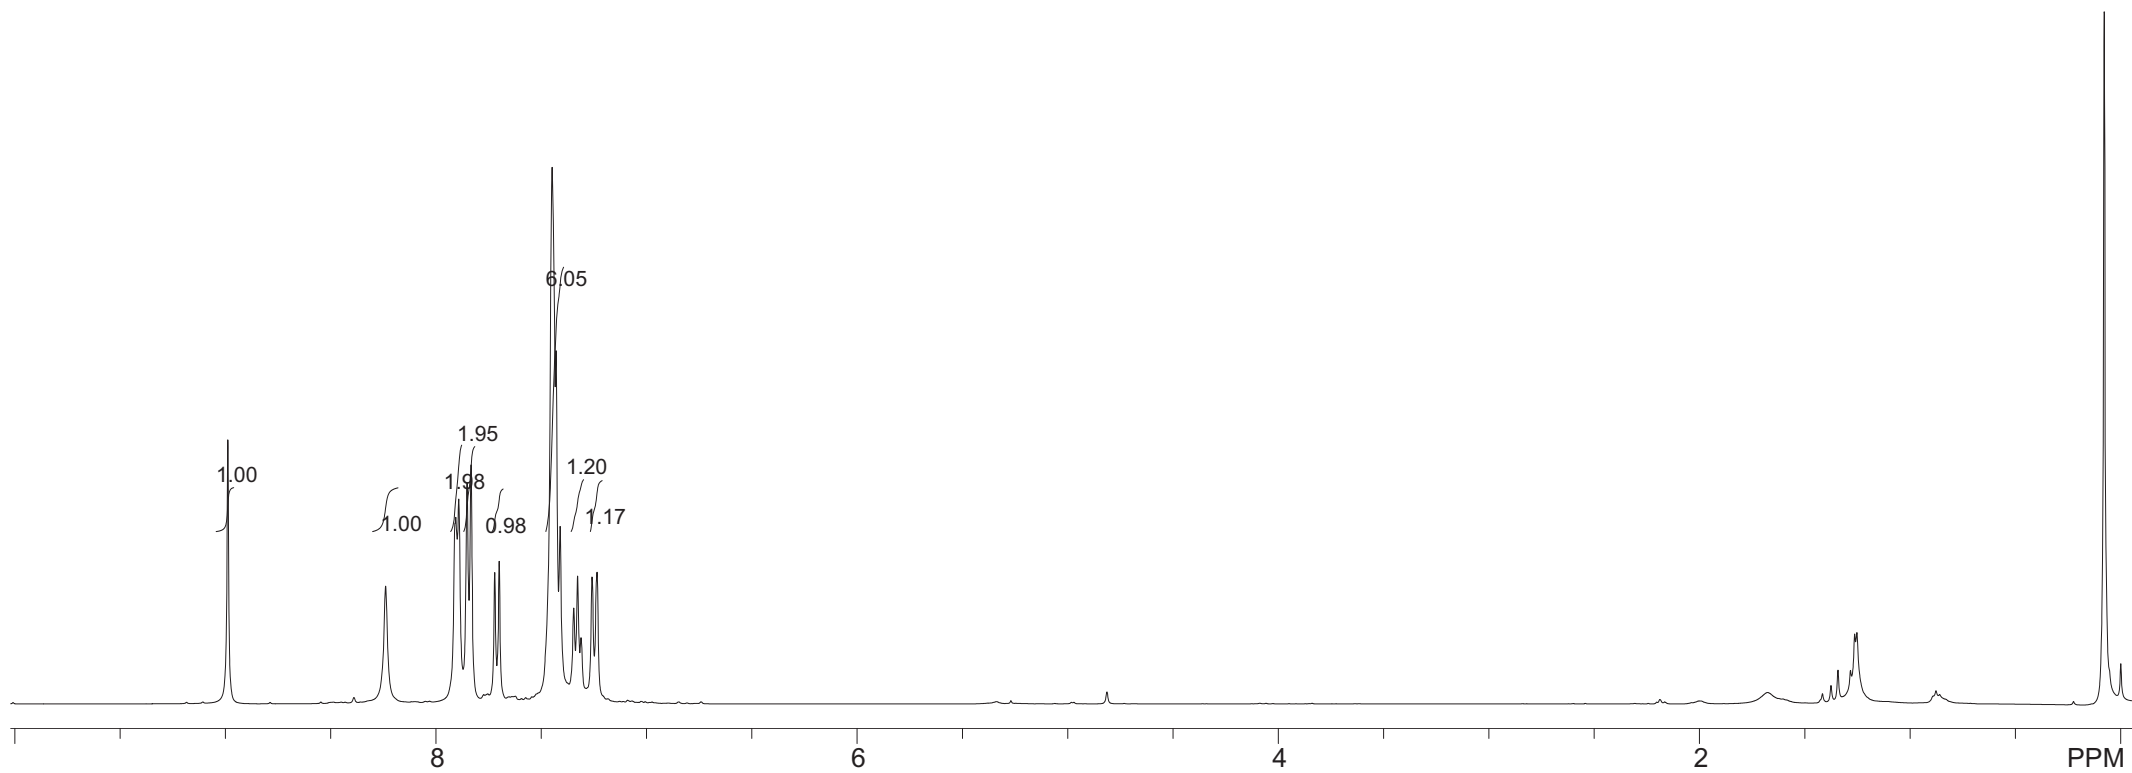

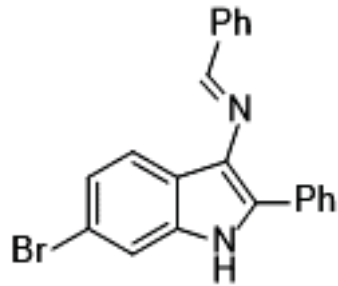

3wa

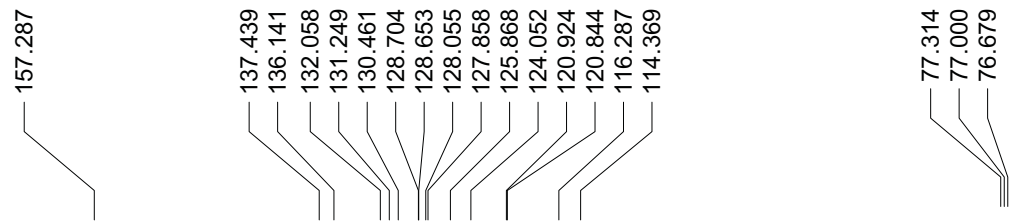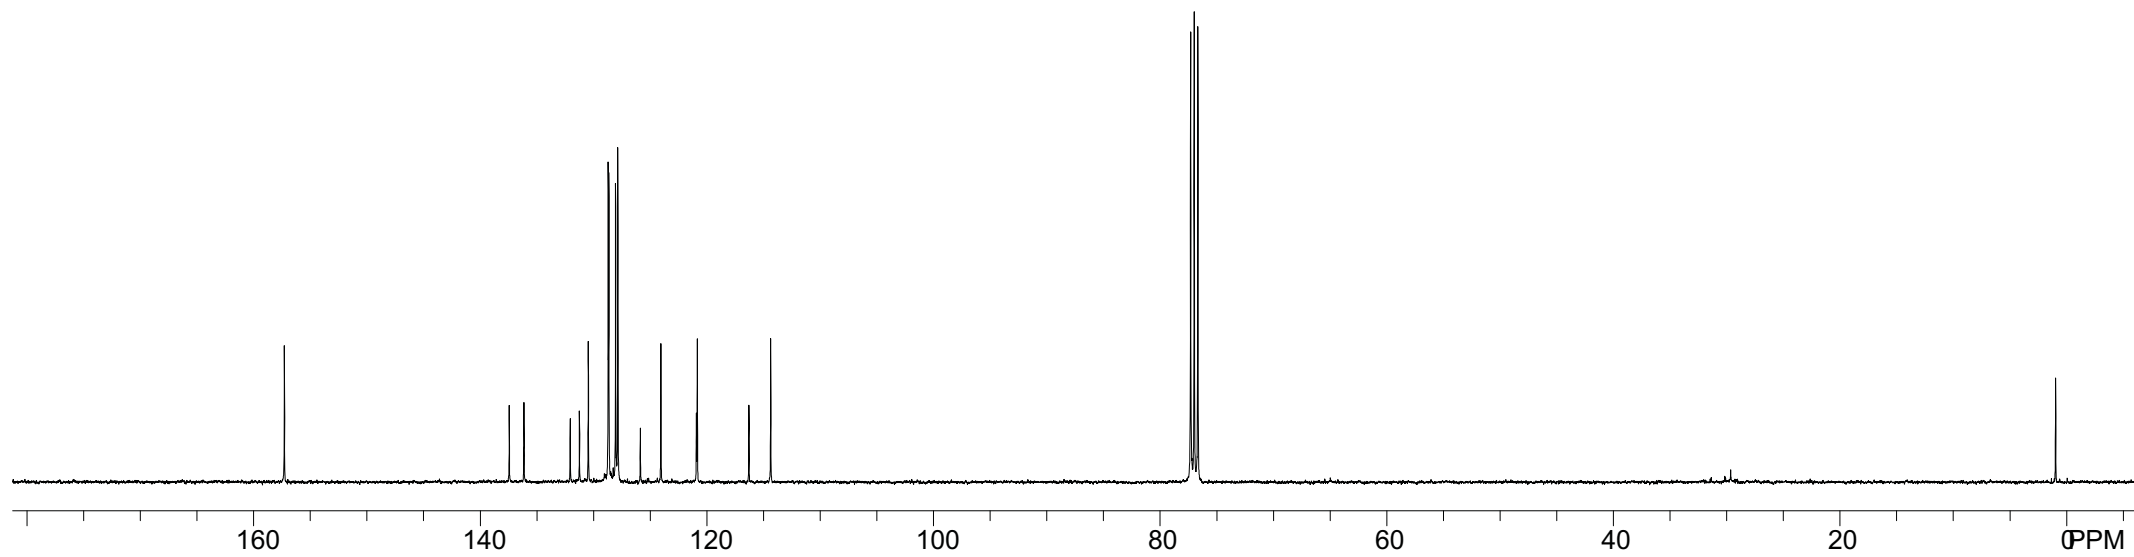



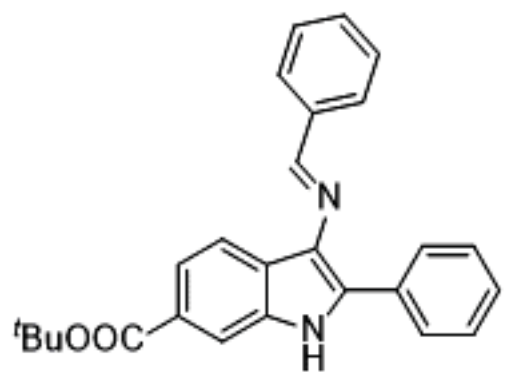

3xa

9.111  
8.119  
8.563  
7.977  
7.959  
7.949  
7.924  
7.903  
7.847  
7.825  
7.520  
7.501  
7.477  
7.462  
7.447  
7.405  
7.387  
7.369

1.639

-0.000

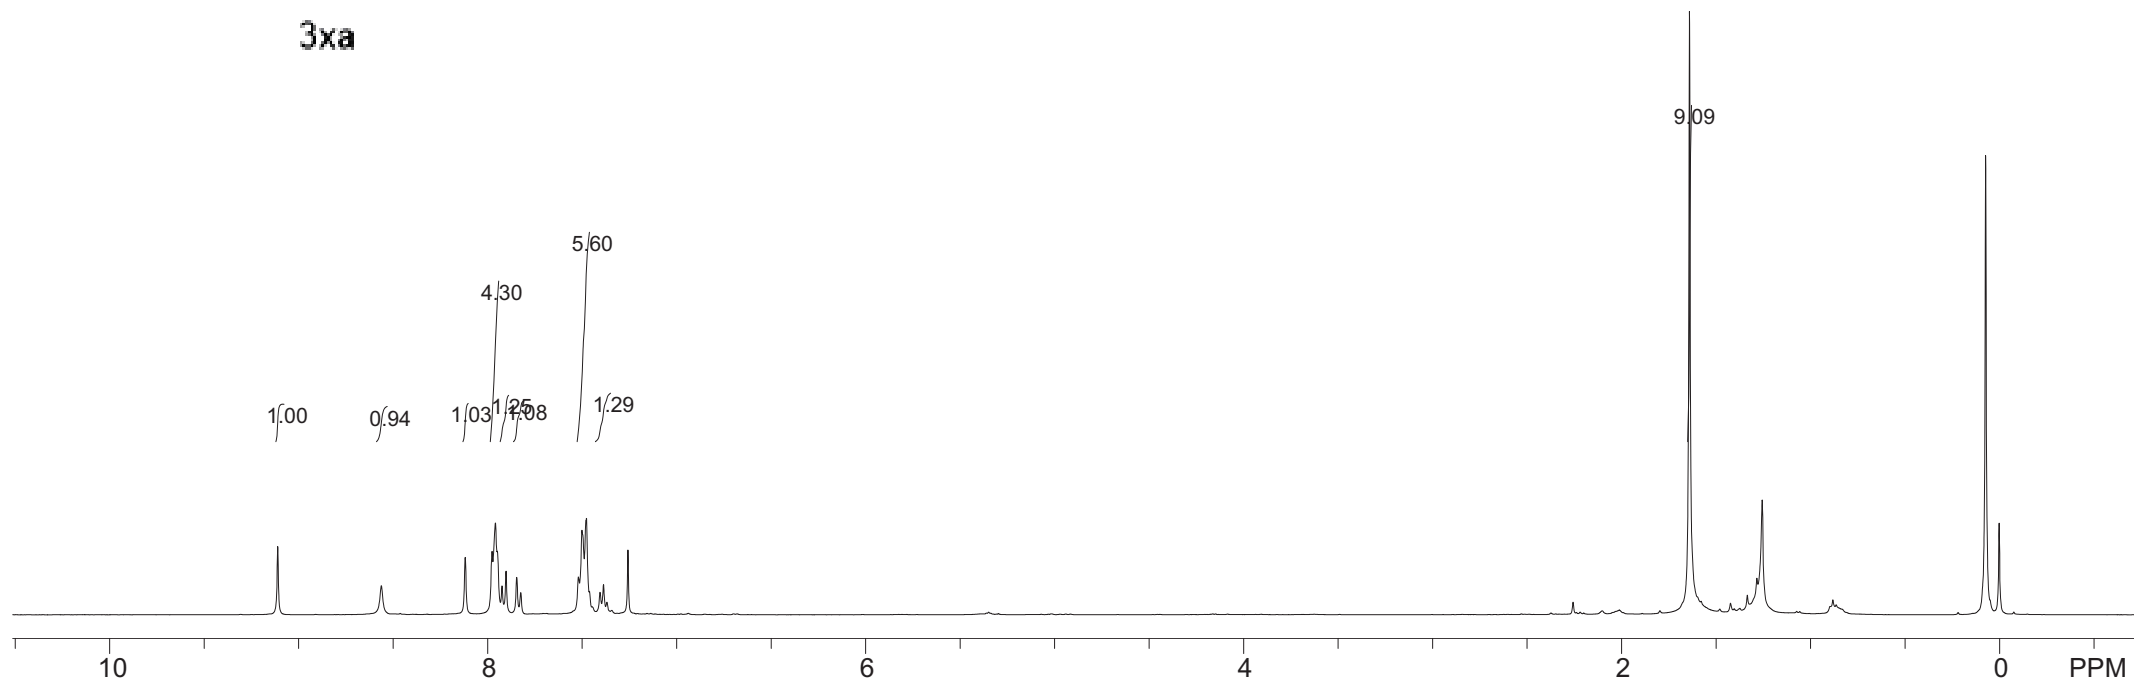

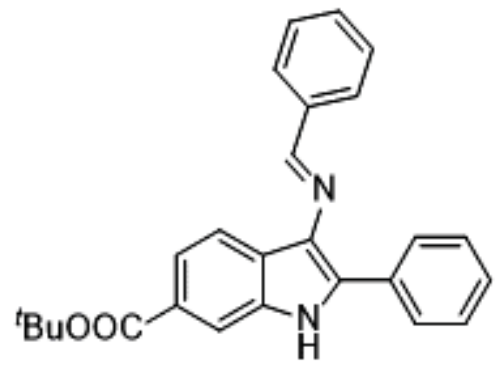

3xa

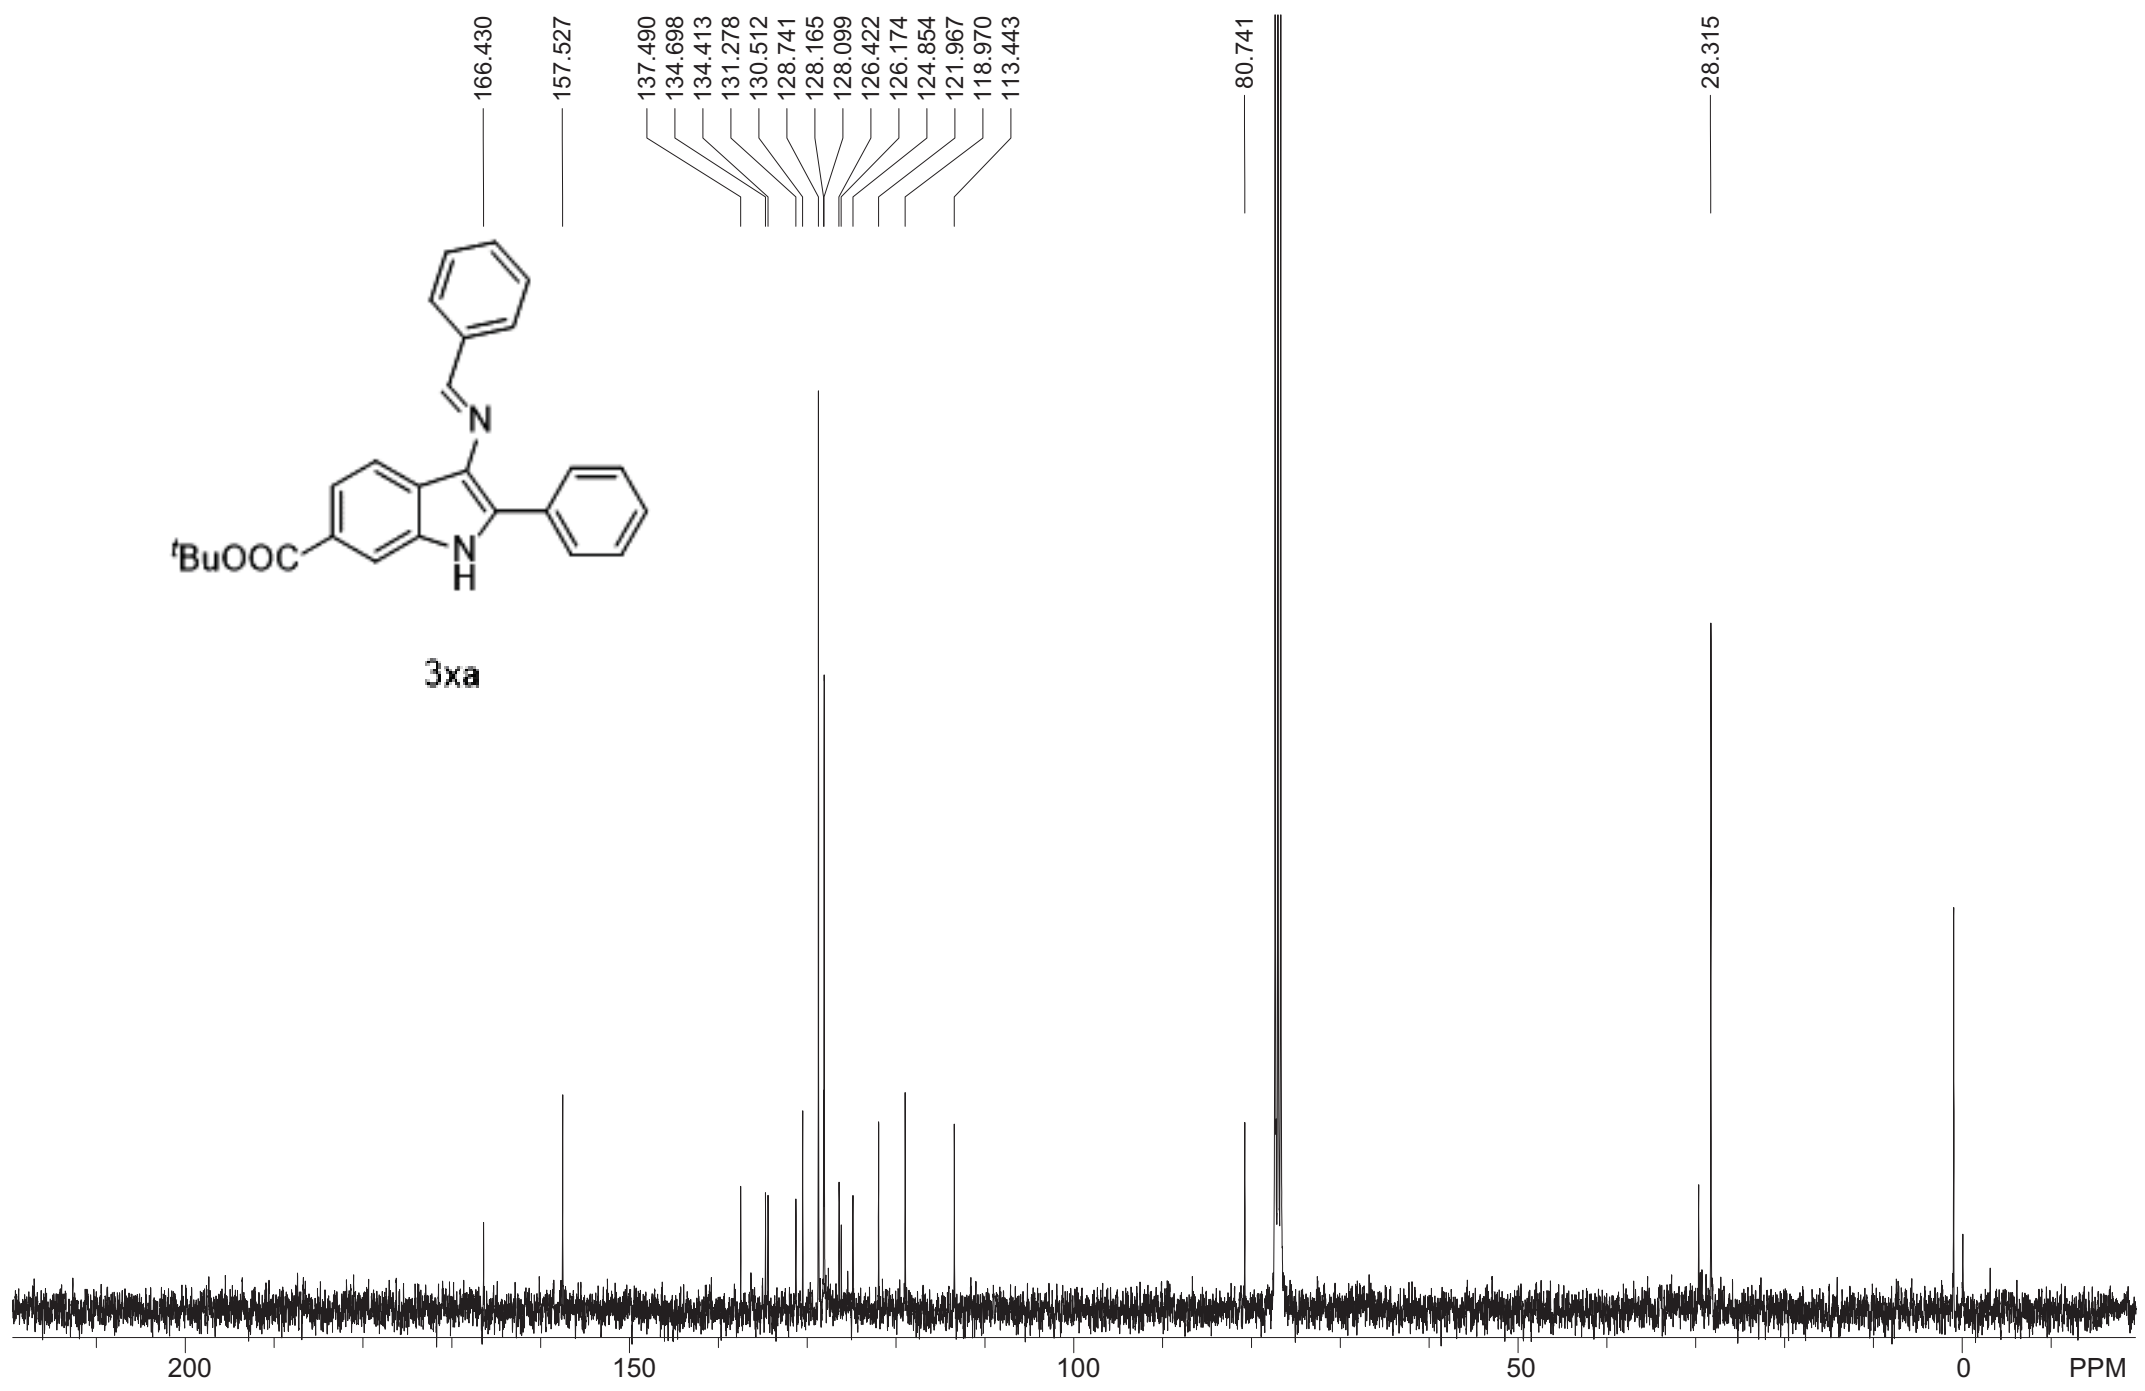

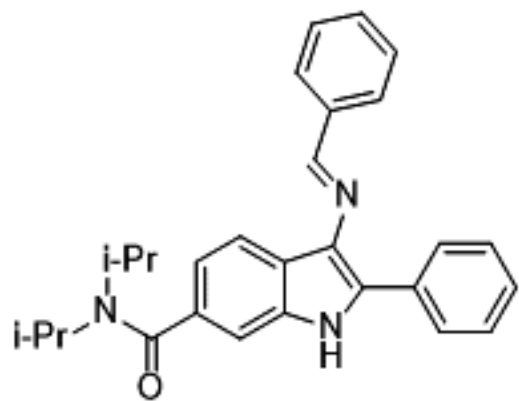

3ya

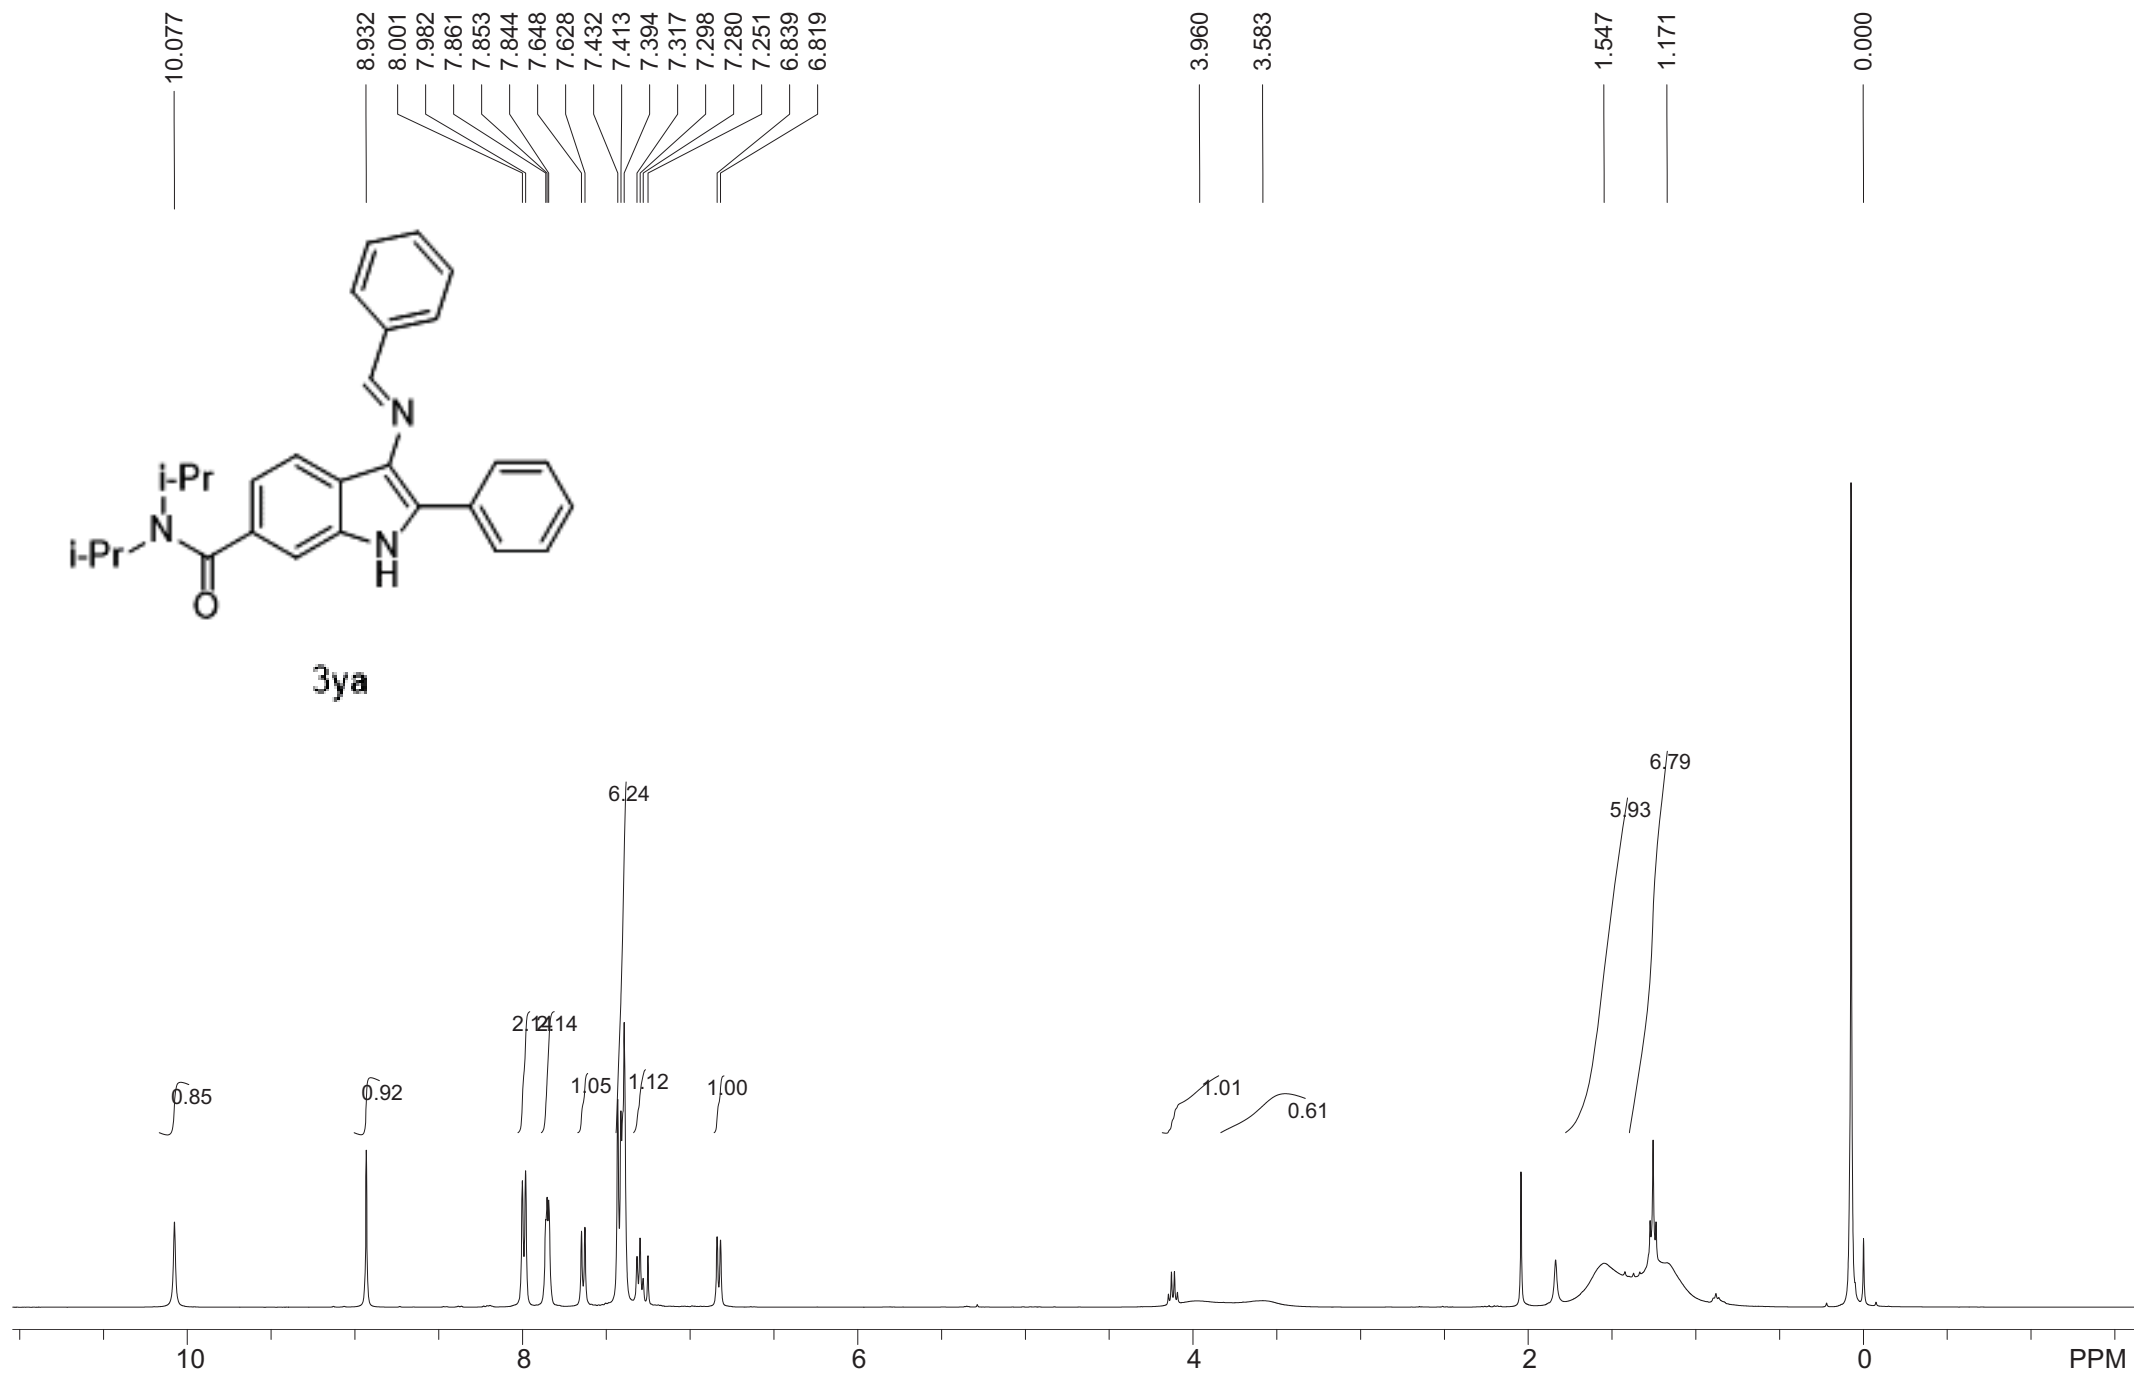

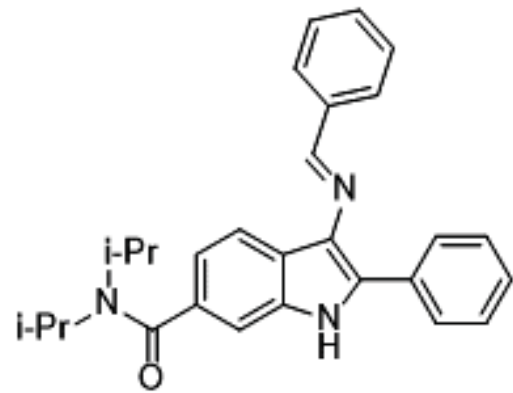

3ya

172.511  
155.887  
137.797  
135.398  
133.750  
132.233  
131.854  
129.929  
128.551  
128.310  
128.288  
127.887  
127.289  
125.423  
121.741  
118.963  
117.315  
110.388

20.761

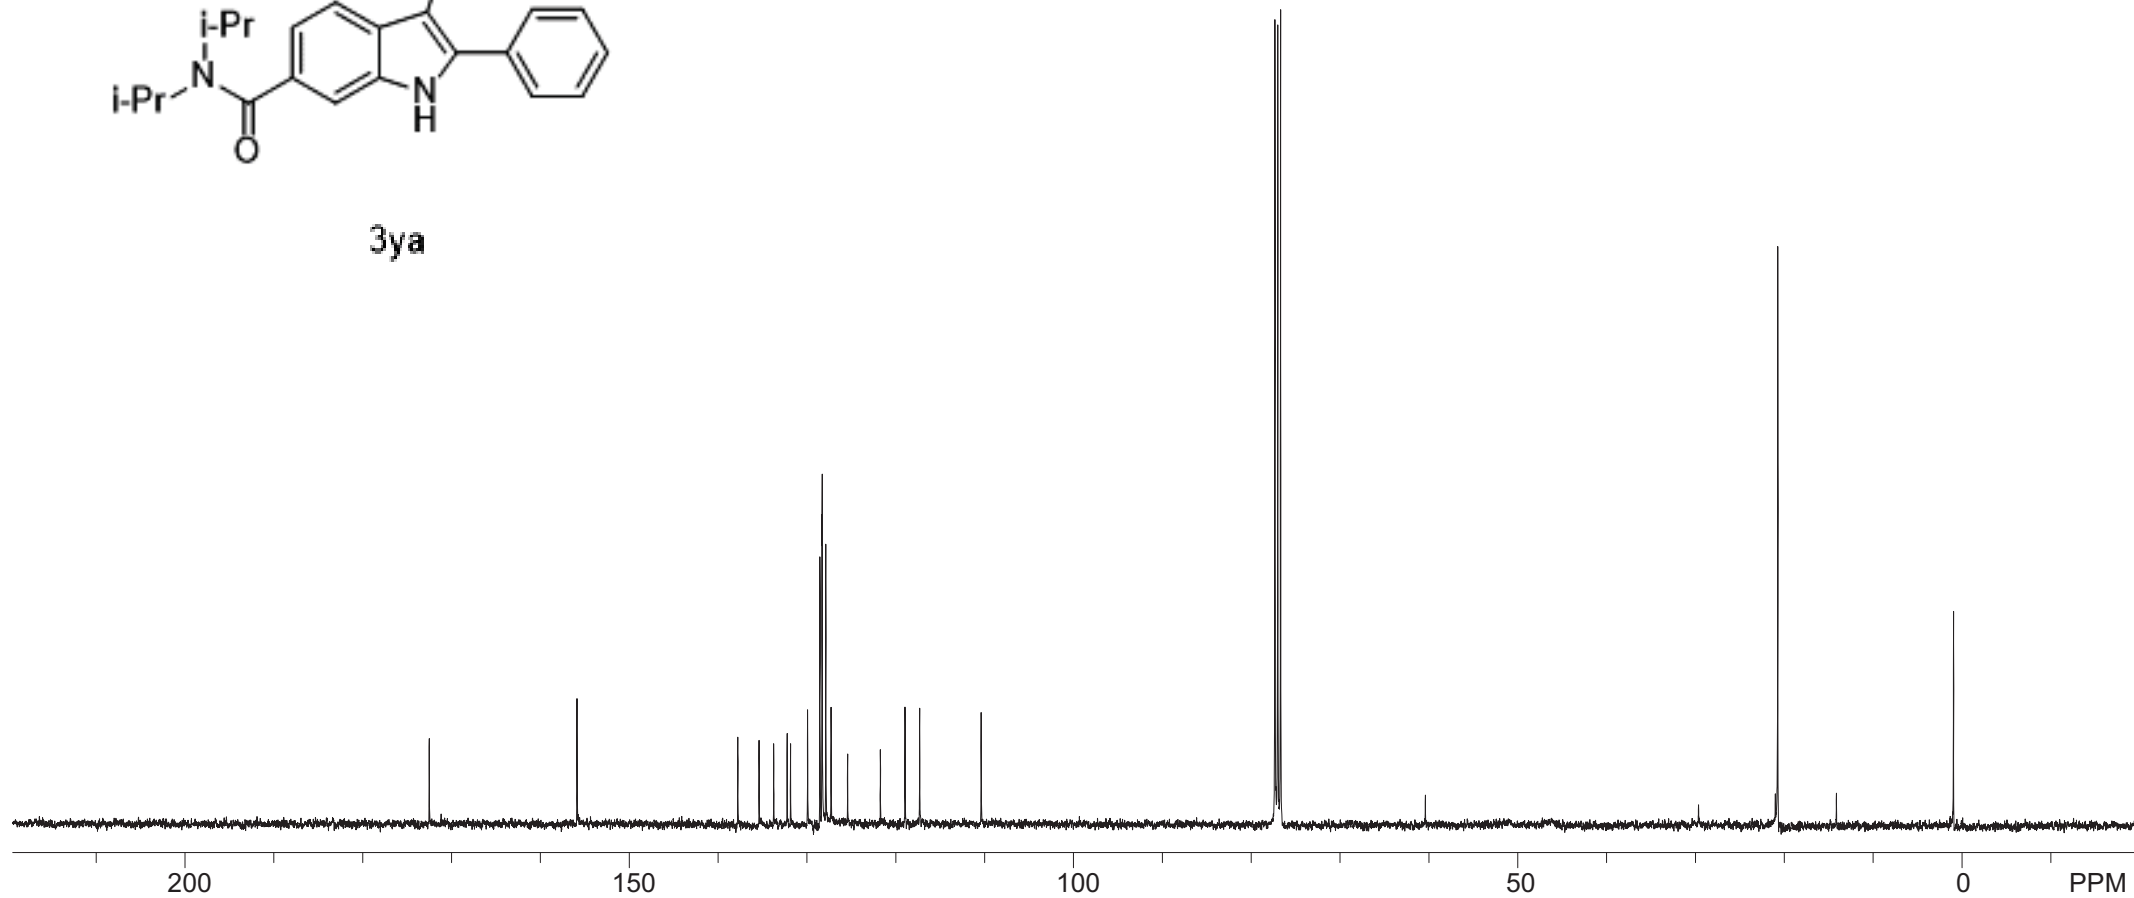

9.095  
8.092  
7.950  
7.932  
7.916  
7.786  
7.766  
7.480  
7.462  
7.454  
7.444  
7.435  
7.410  
7.347  
7.329  
7.311  
7.130  
7.111  
7.092  
7.049  
7.032

2.510

-0.000

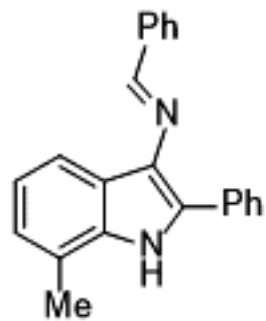

3za

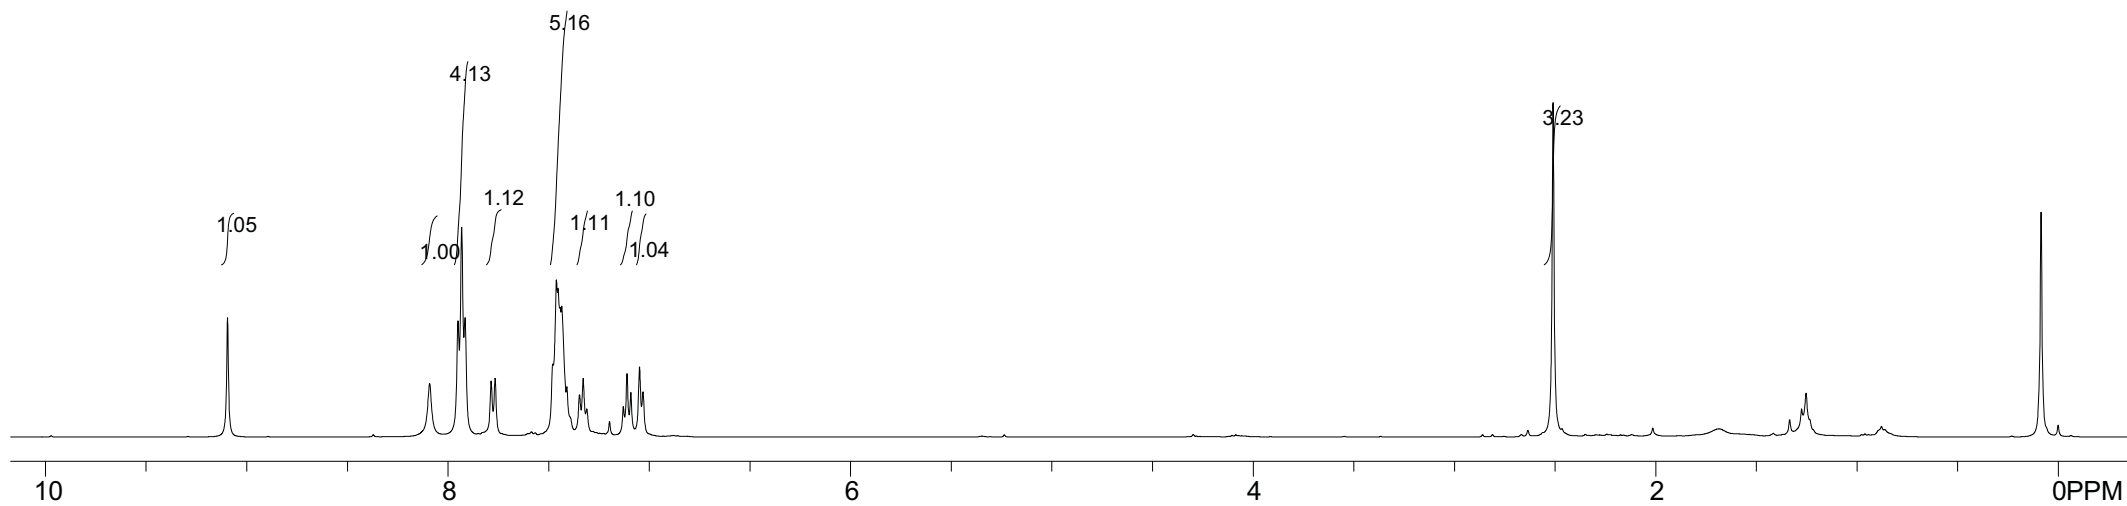

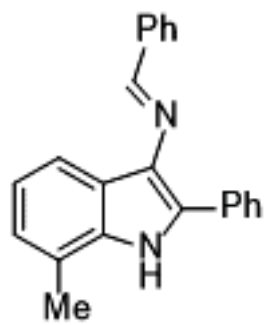

3za

156.499  
137.811  
134.880  
131.927  
131.679  
130.126  
128.624  
128.558  
127.968  
127.946  
127.501  
126.444  
123.688  
121.588  
121.084  
120.457  
117.606

77.314  
77.000  
76.679

16.379

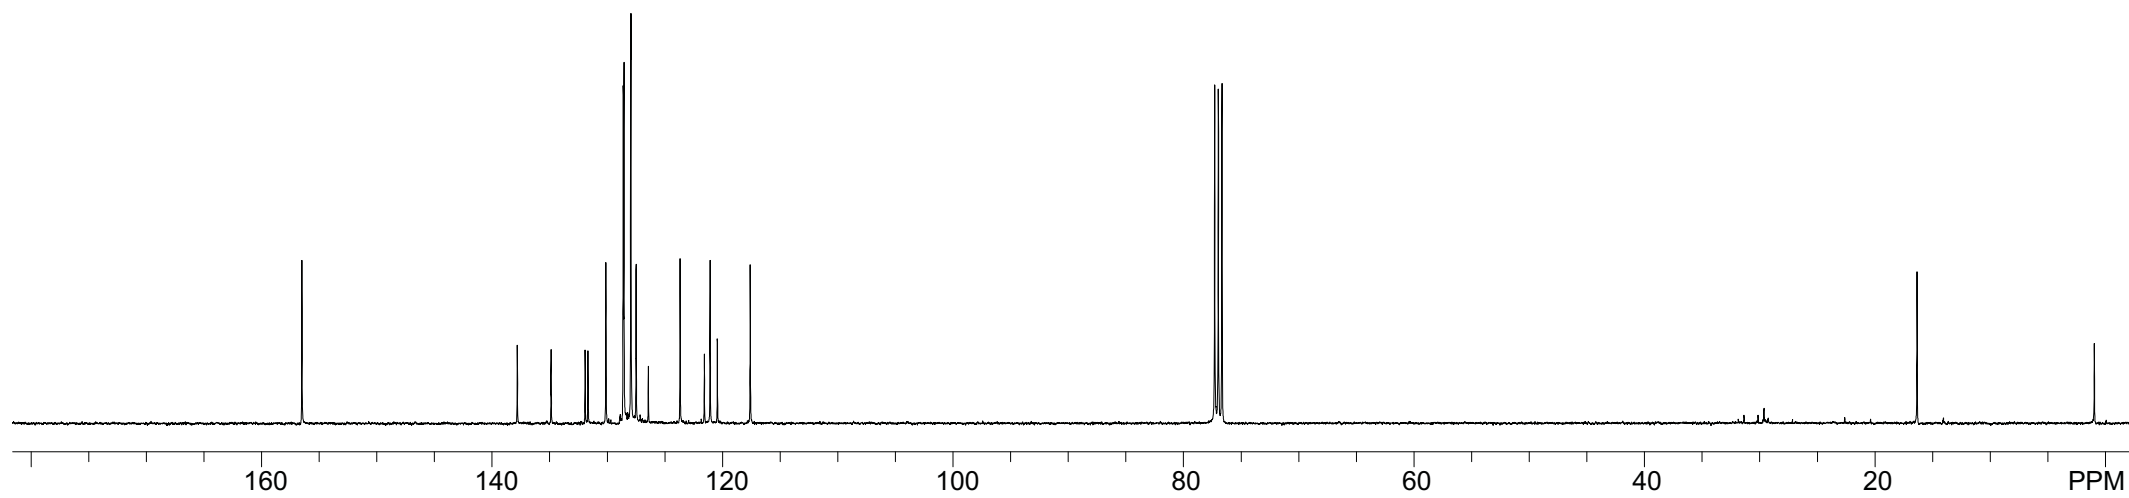

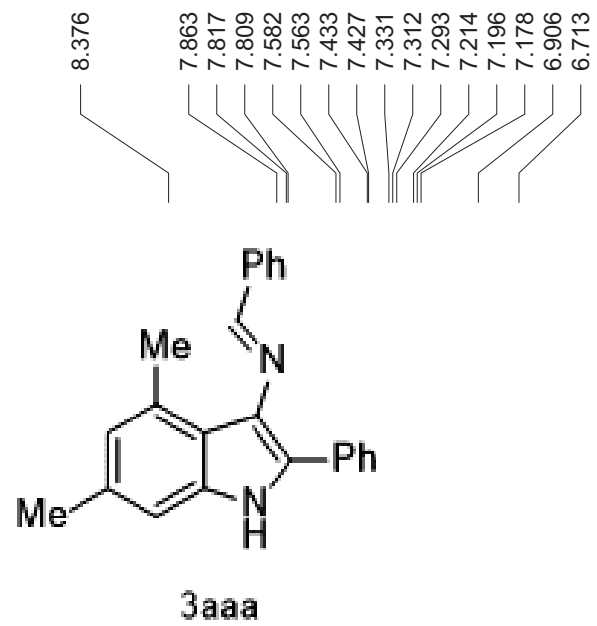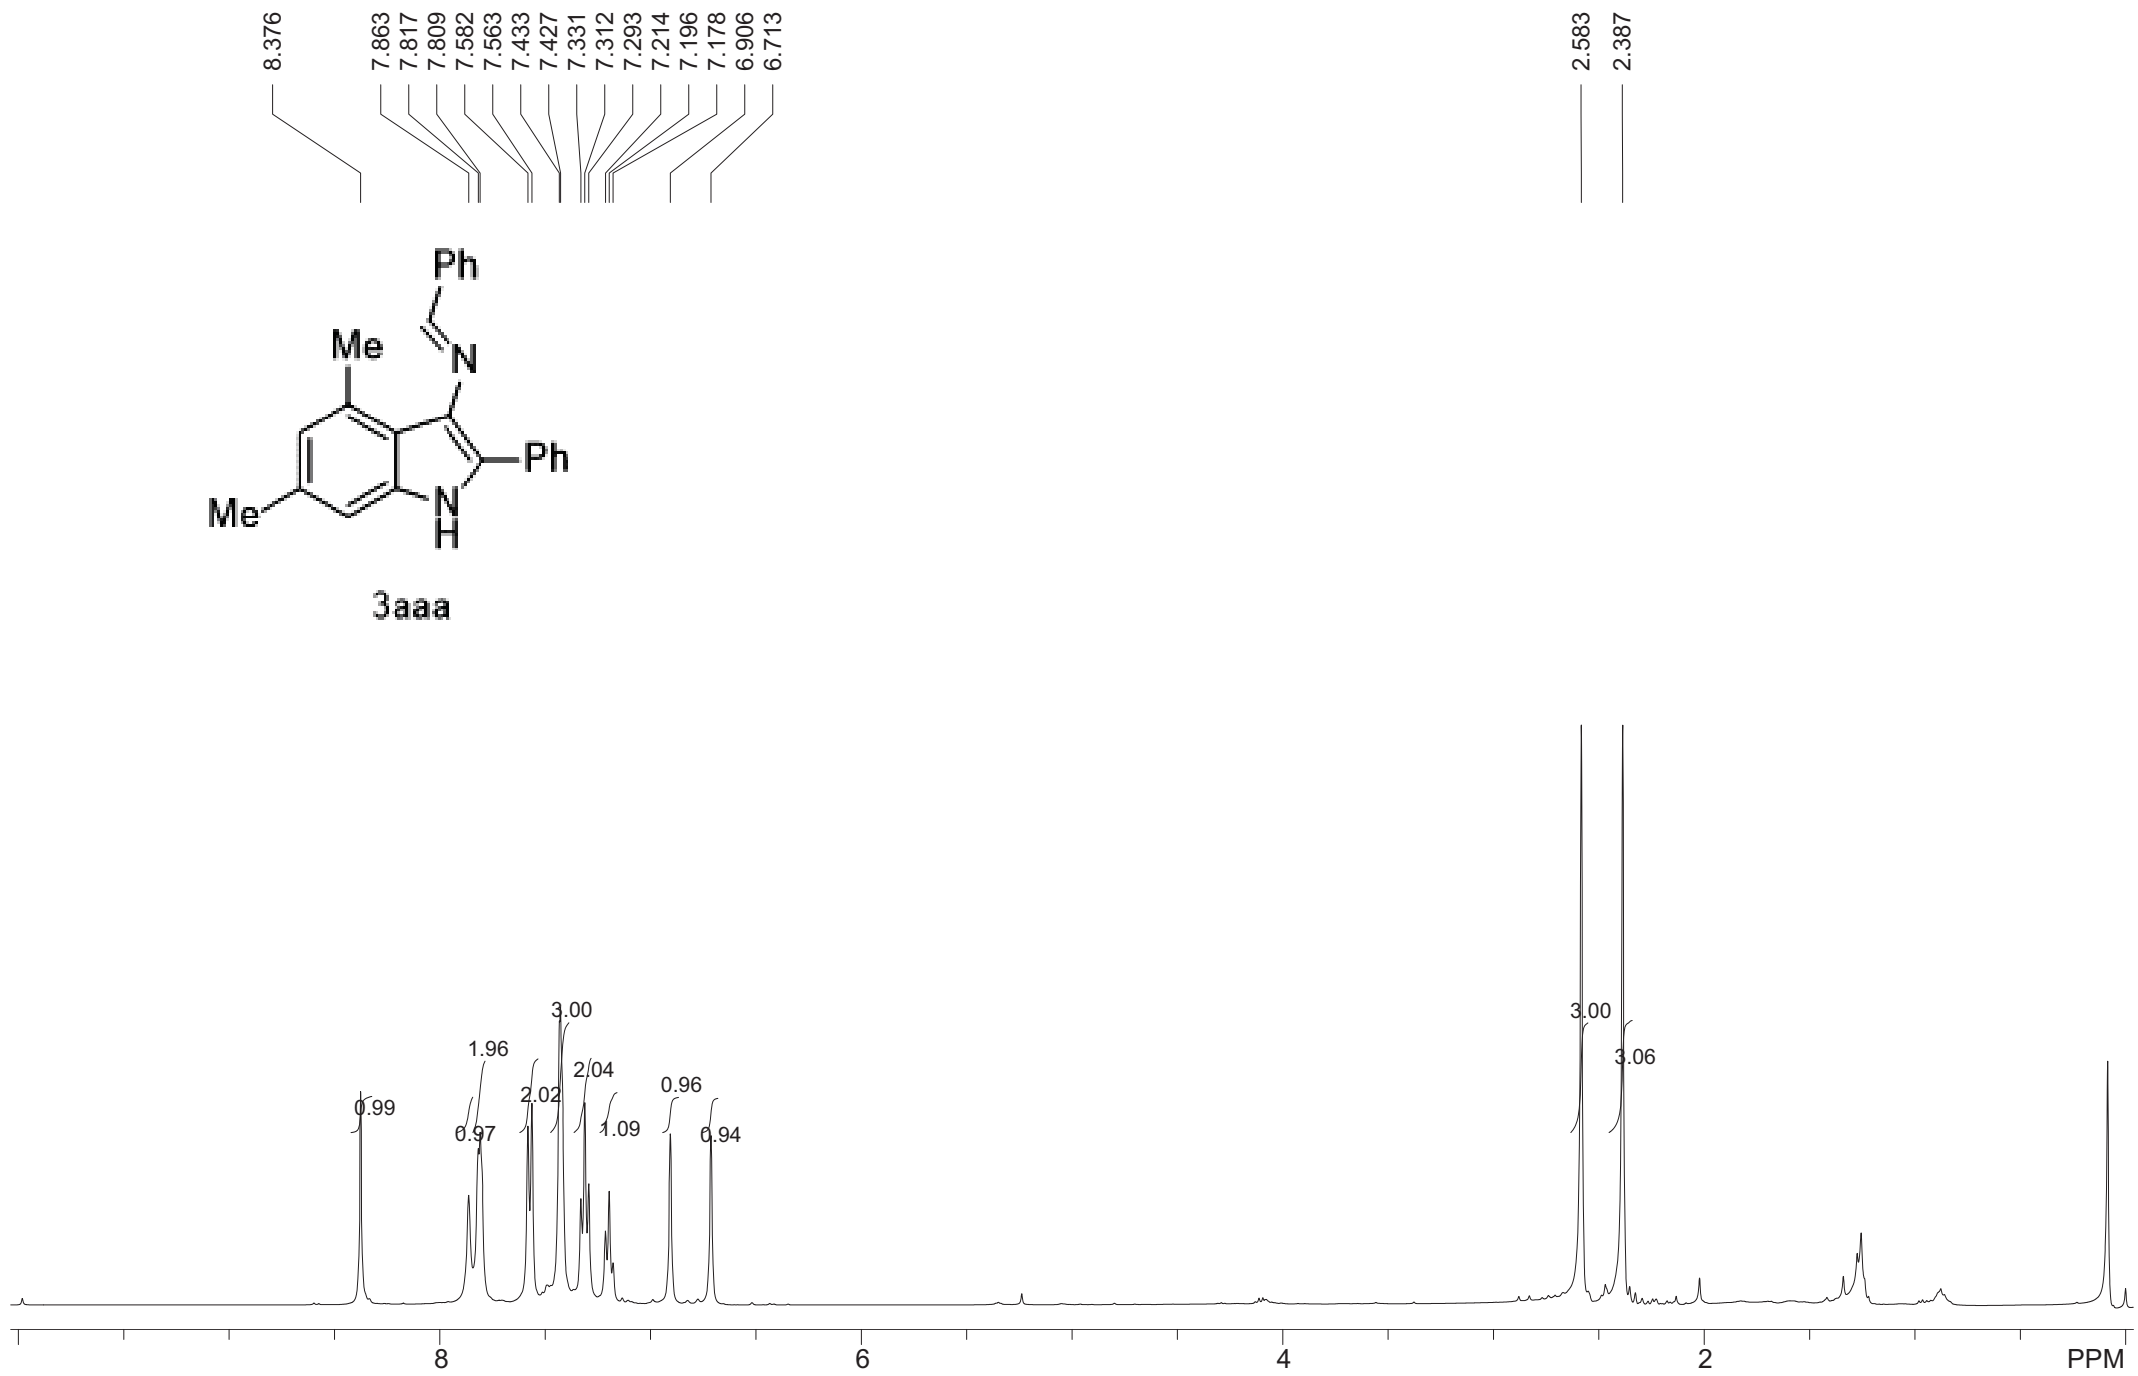

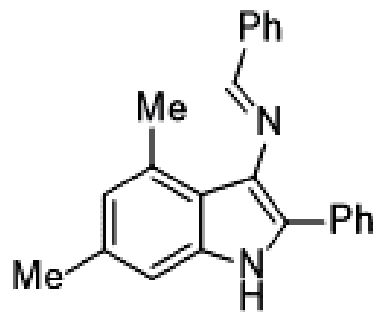

3aaa

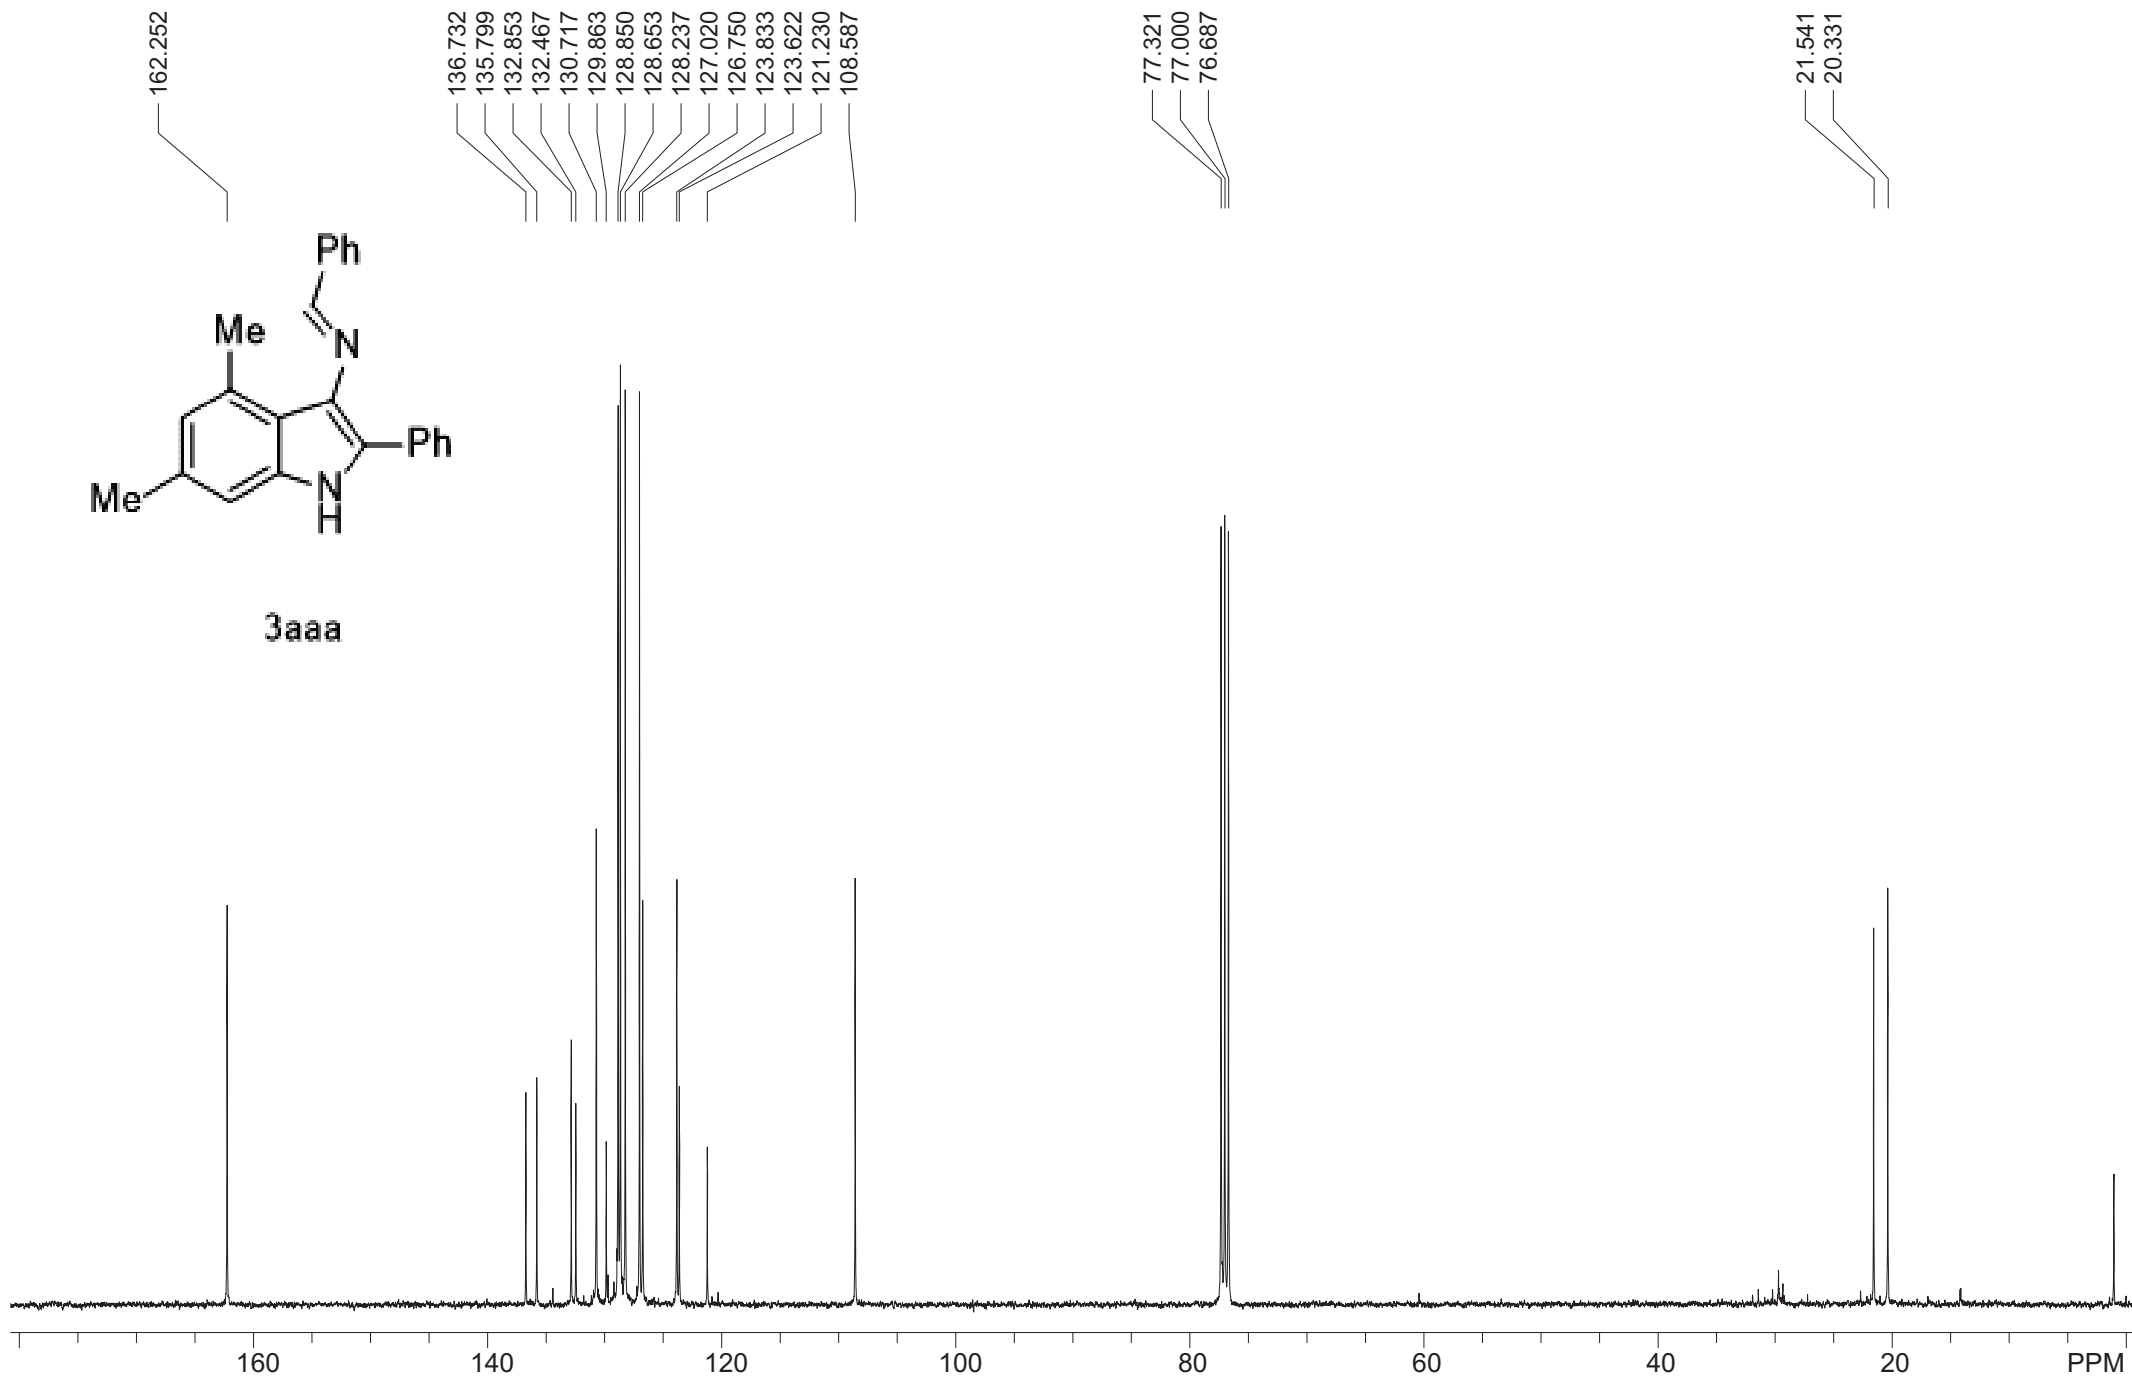



9.073  
 8.027  
 8.007  
 7.816  
 7.799  
 7.588  
 7.570  
 7.523  
 7.505  
 7.487  
 7.445  
 7.428  
 7.408  
 7.403  
 7.382  
 7.363  
 7.335  
 7.317  
 7.298  
 7.262  
 7.245  
 7.226

3.751

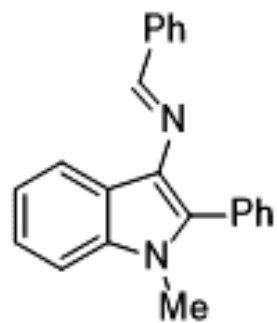

3aab

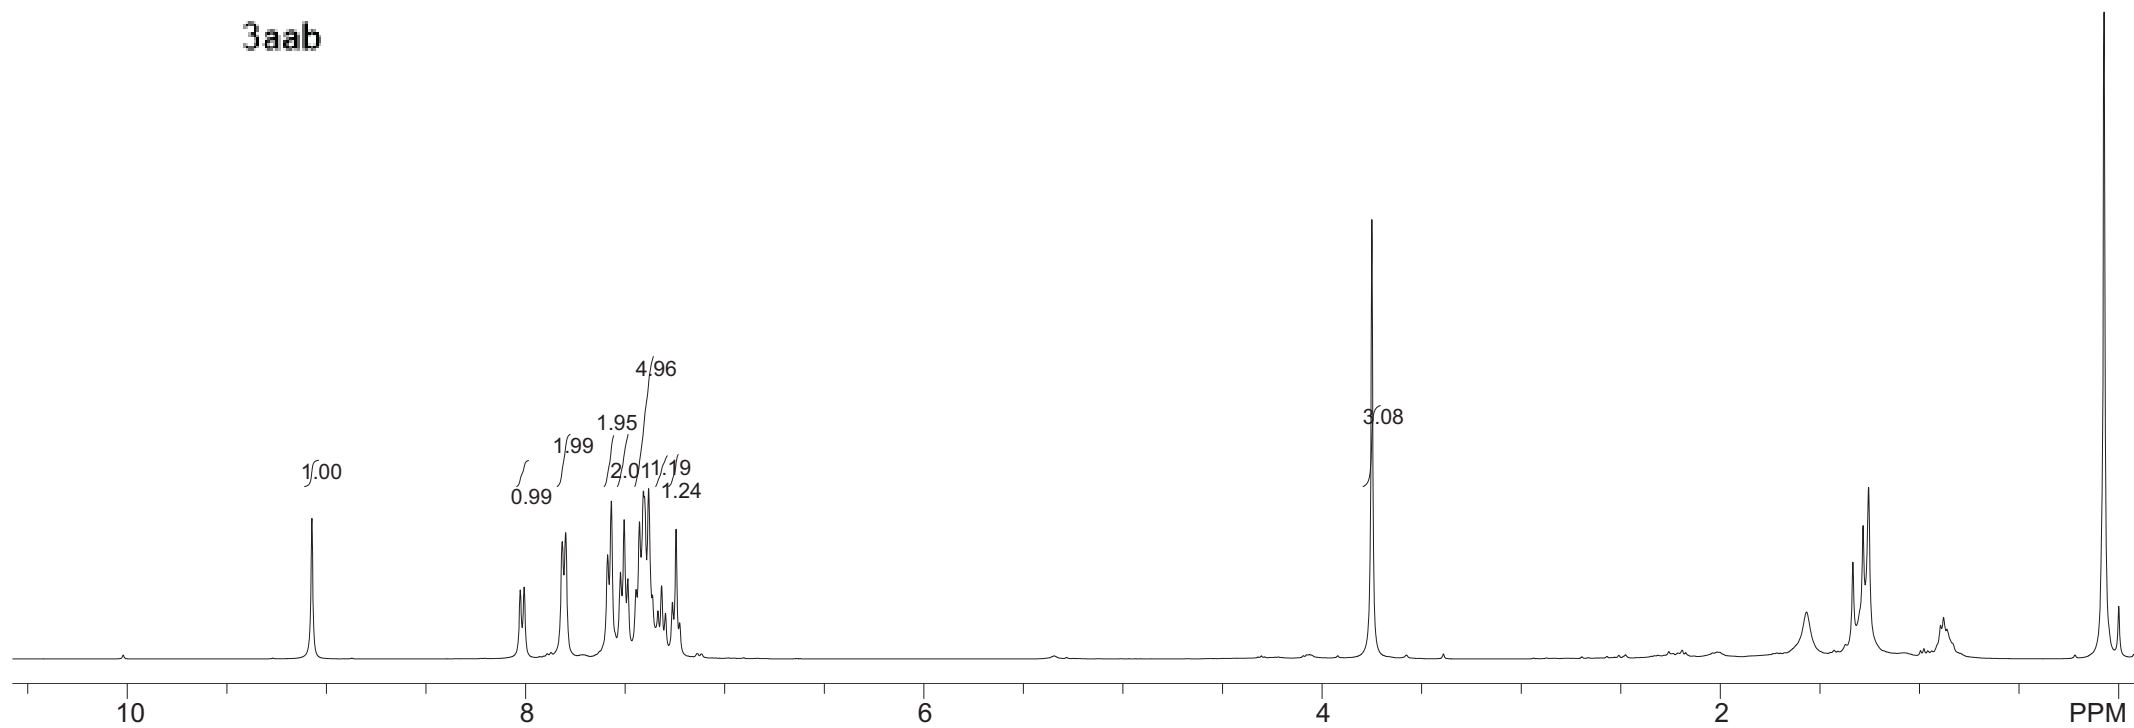

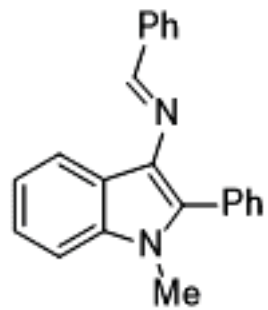

3aab

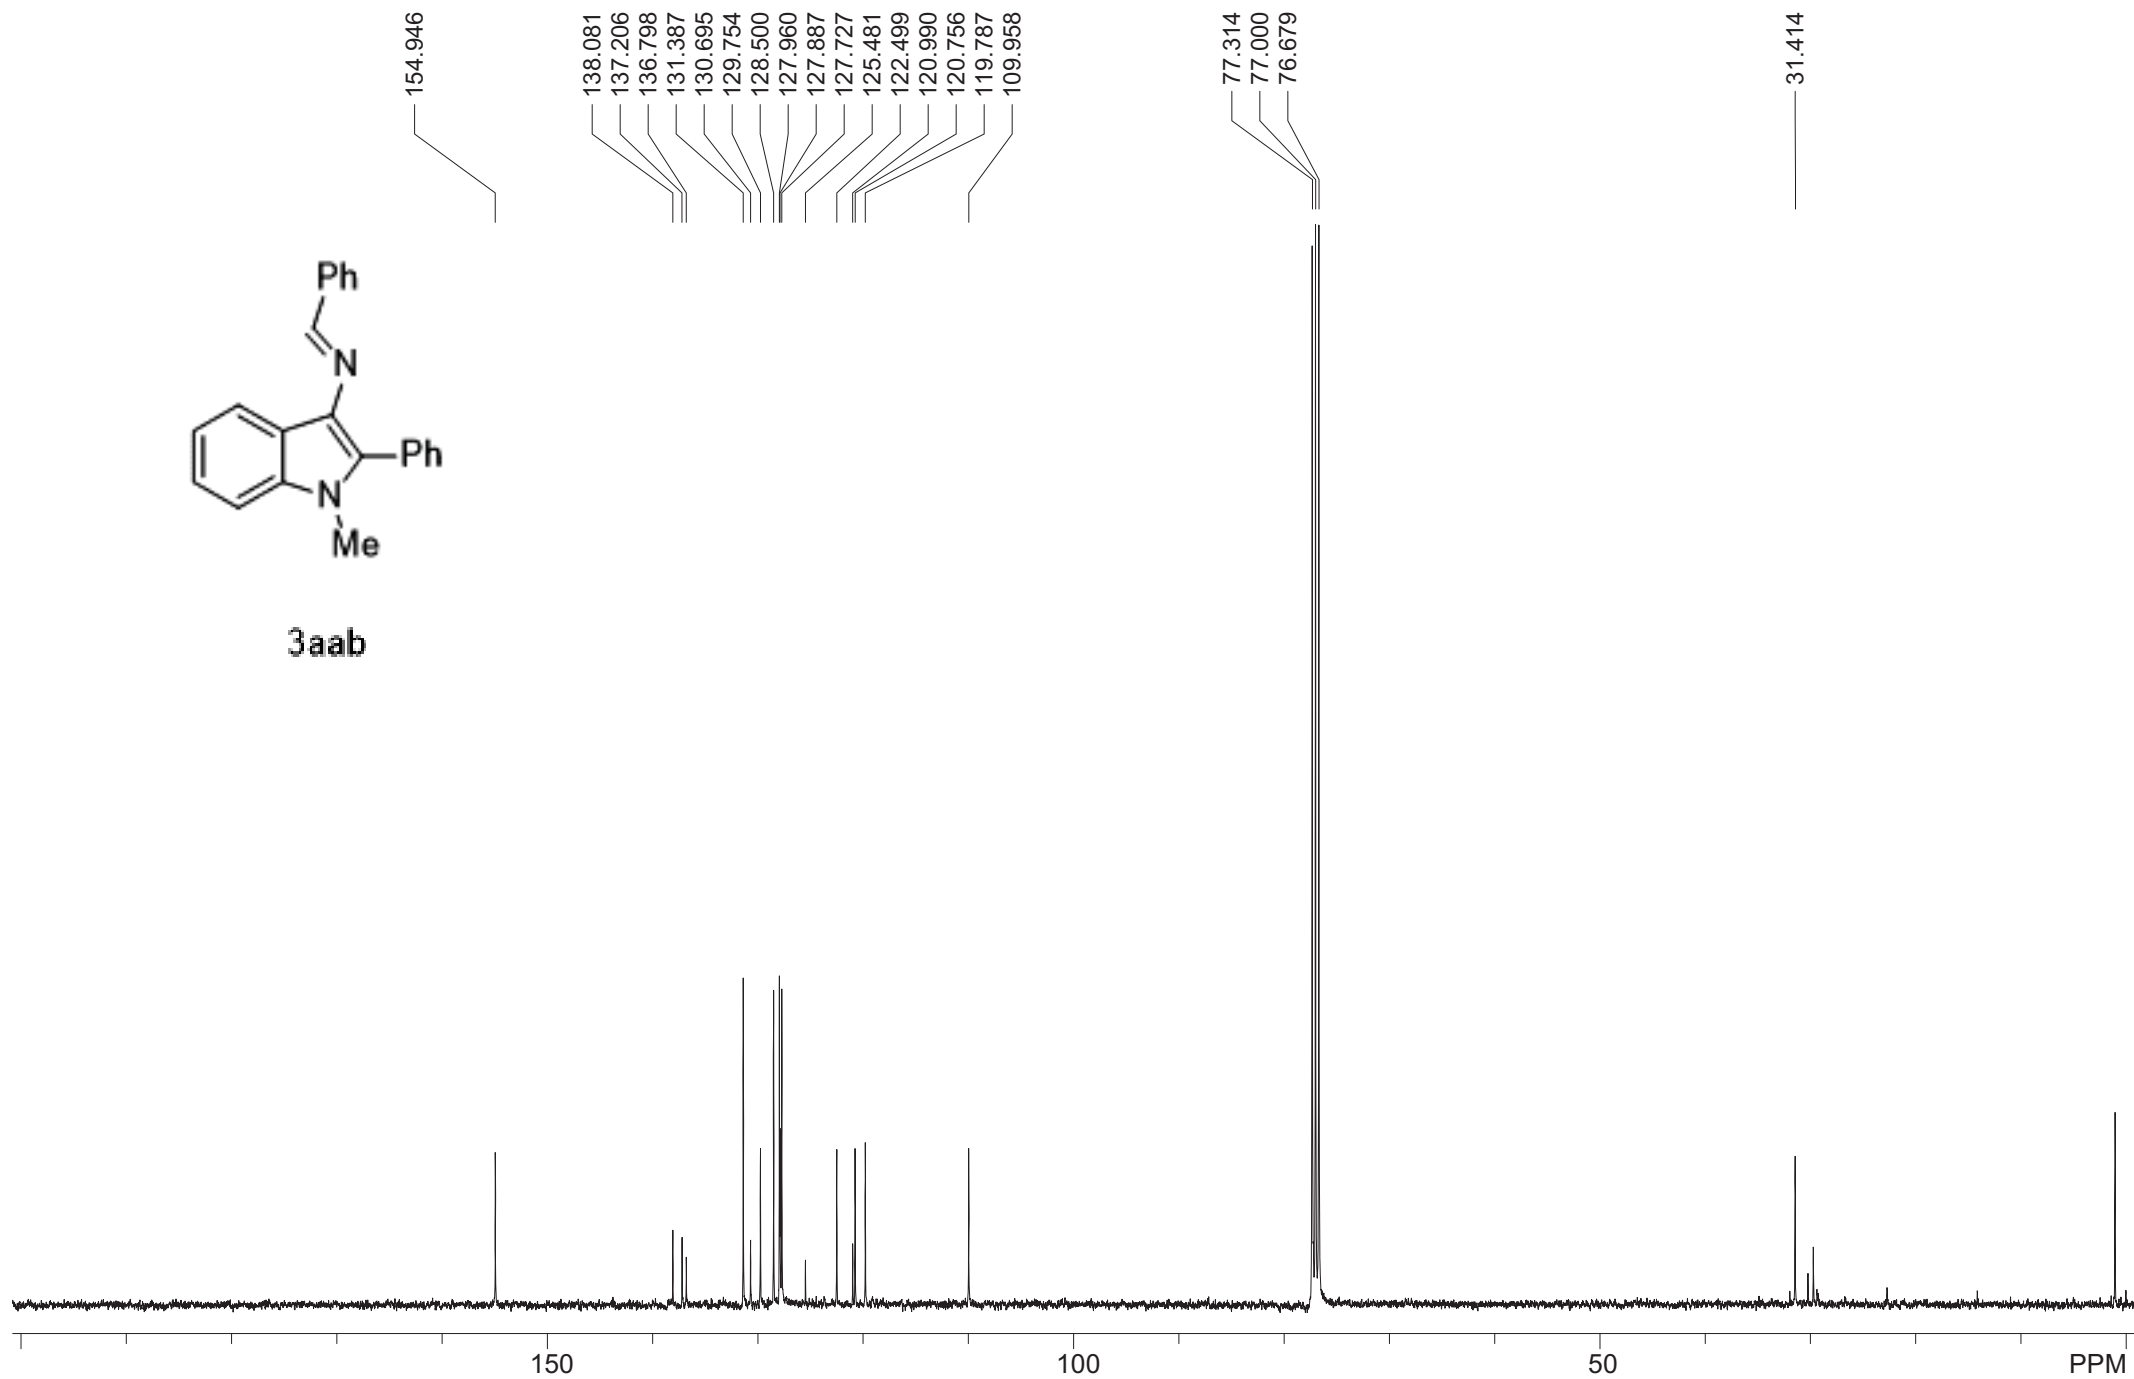

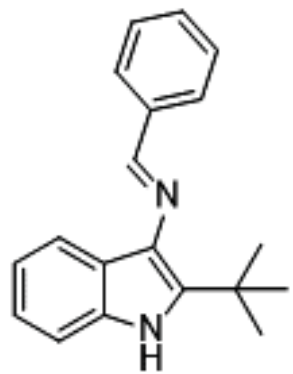

3aad

8.981  
8.043  
7.915  
7.897  
7.881  
7.520  
7.471  
7.454  
7.435  
7.409  
7.391  
7.373  
7.343  
7.334  
7.320  
7.165  
7.158  
7.151  
7.143

1.594  
0.000

0.93  
0.85  
3.04  
1.39  
1.07  
2.02  
2.00

9.73

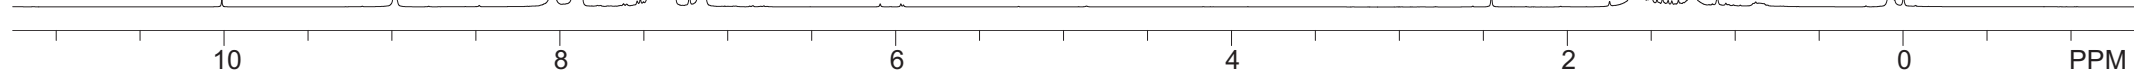

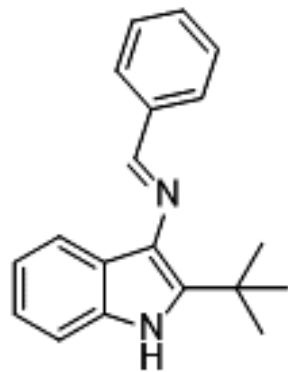

3aad

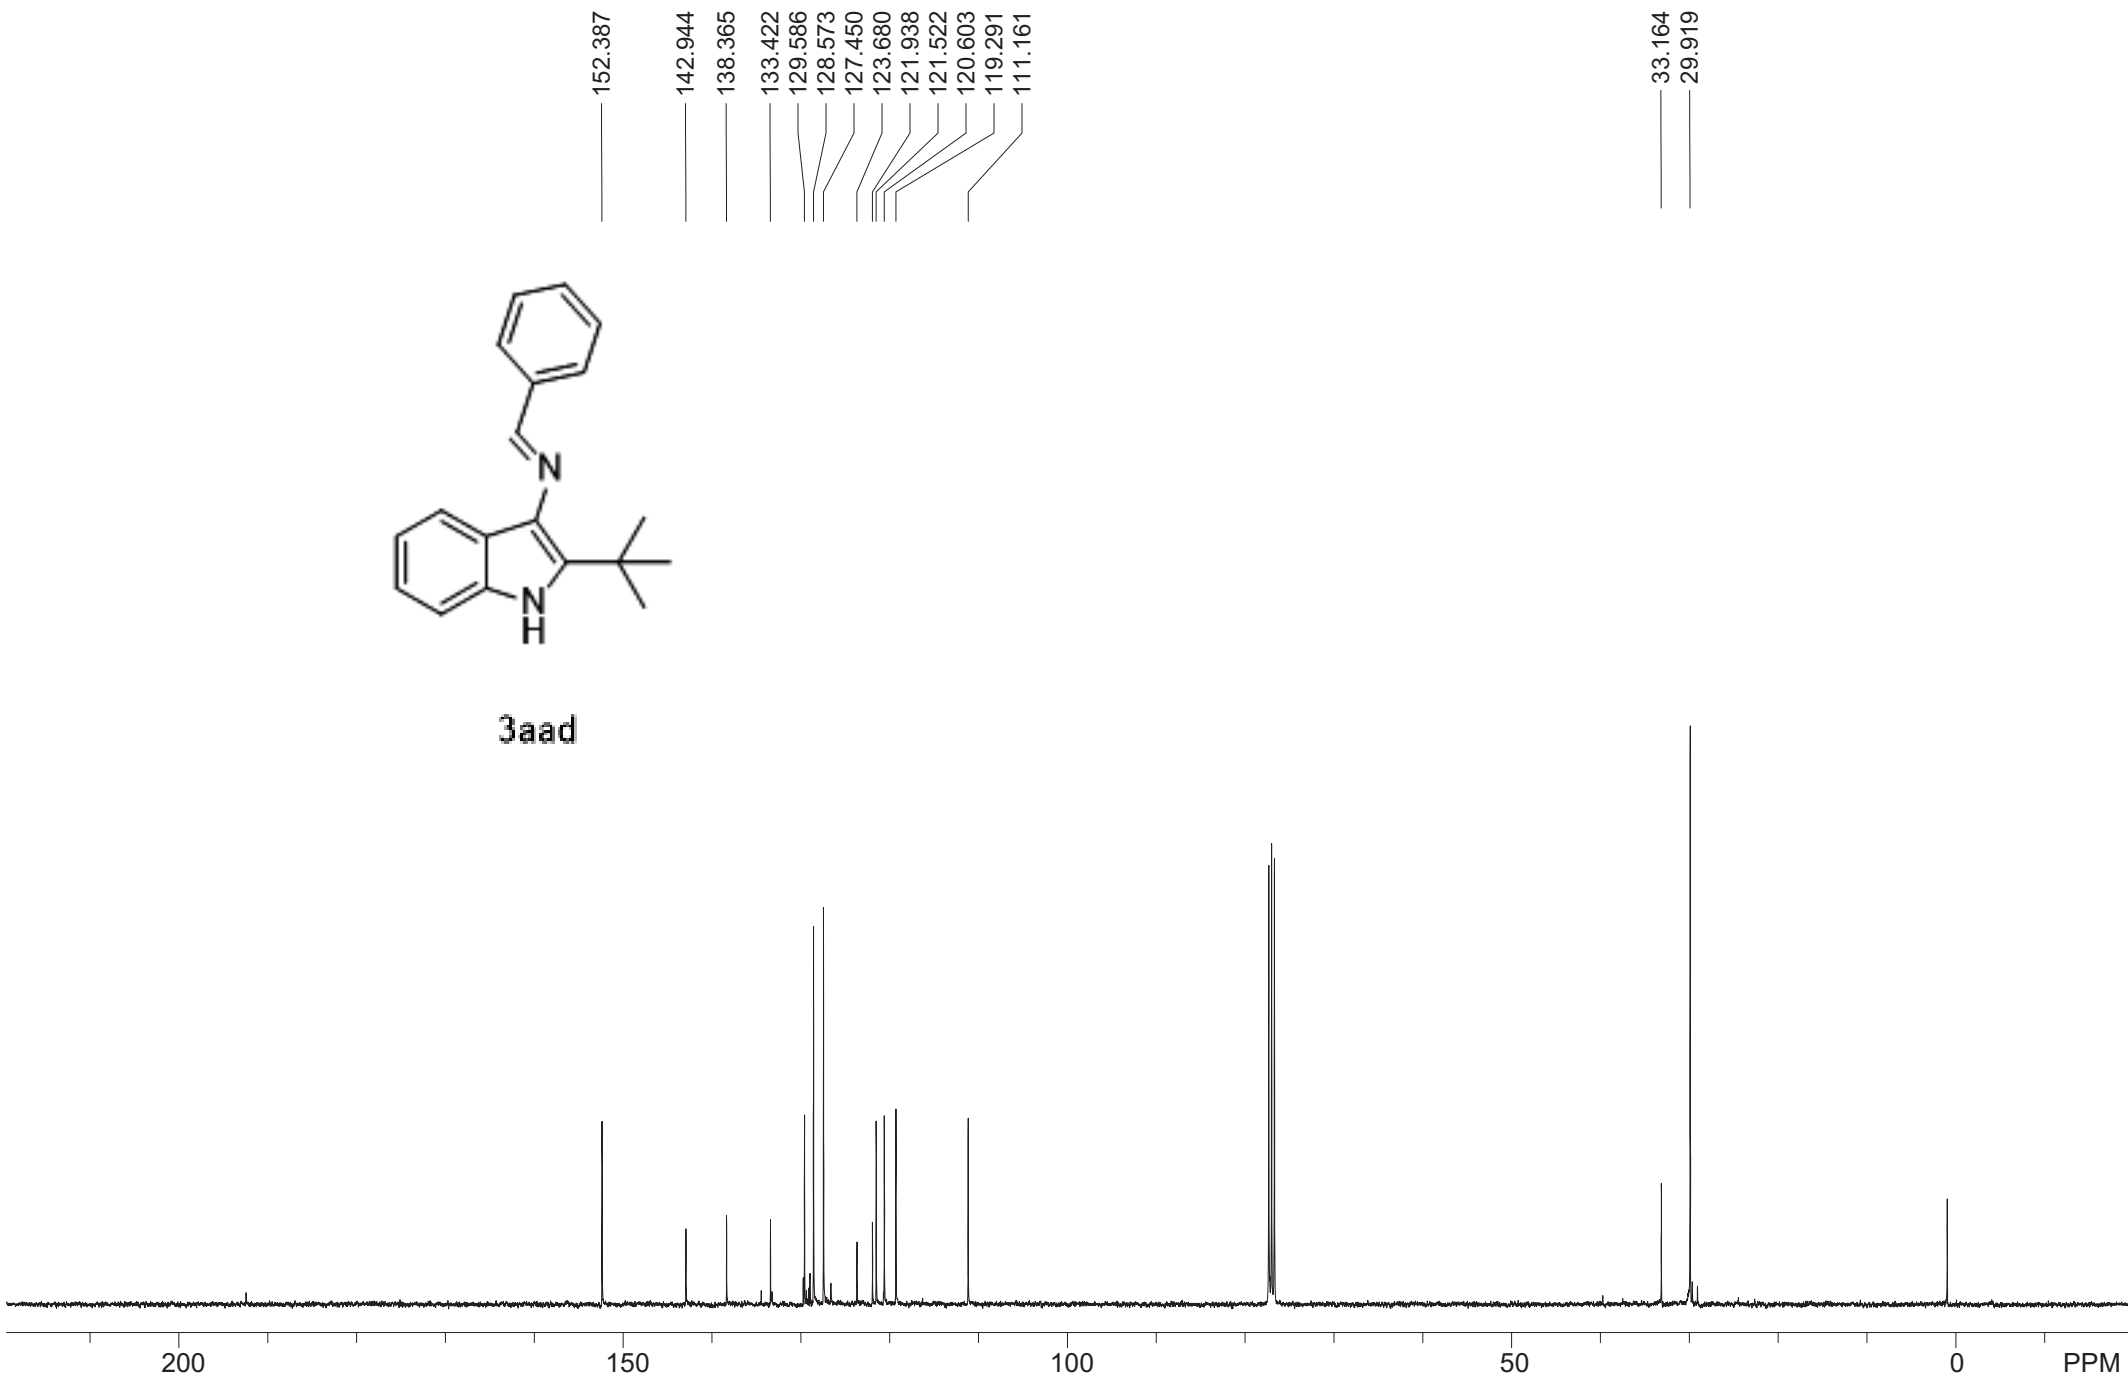

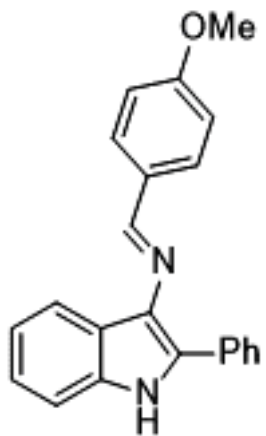

3ab

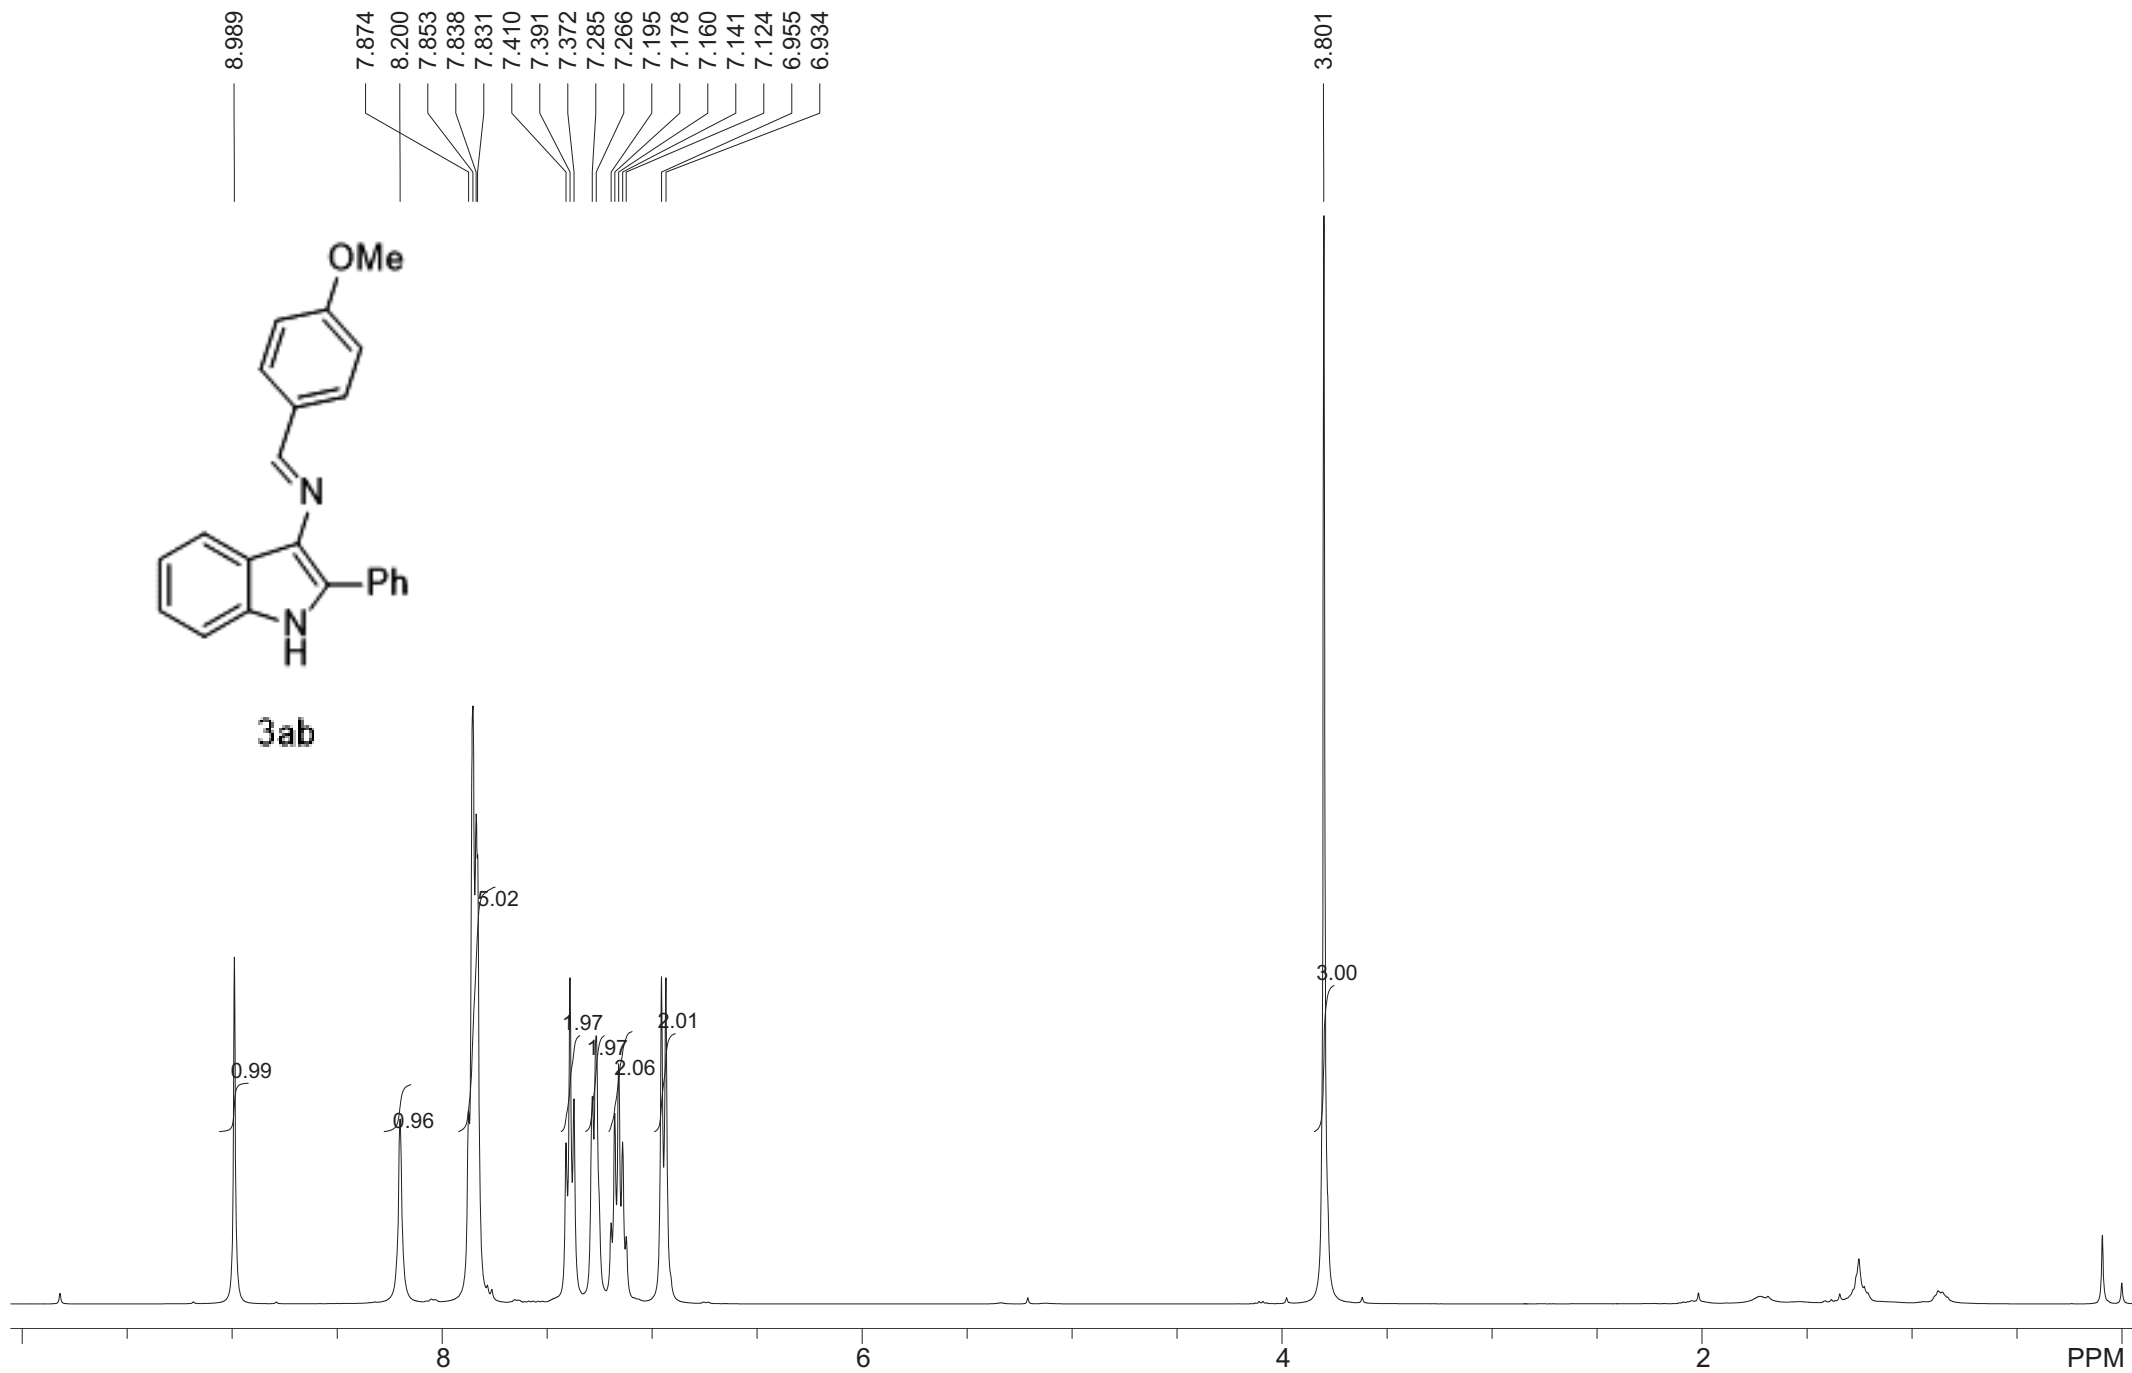

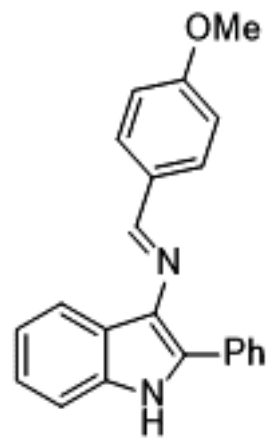

3ab

161.377

156.499

131.825

135.398

130.935

130.687

129.492

128.485

127.749

127.304

126.189

122.849

122.091

120.611

119.633

114.085

111.452

77.321

77.000

76.687

55.315

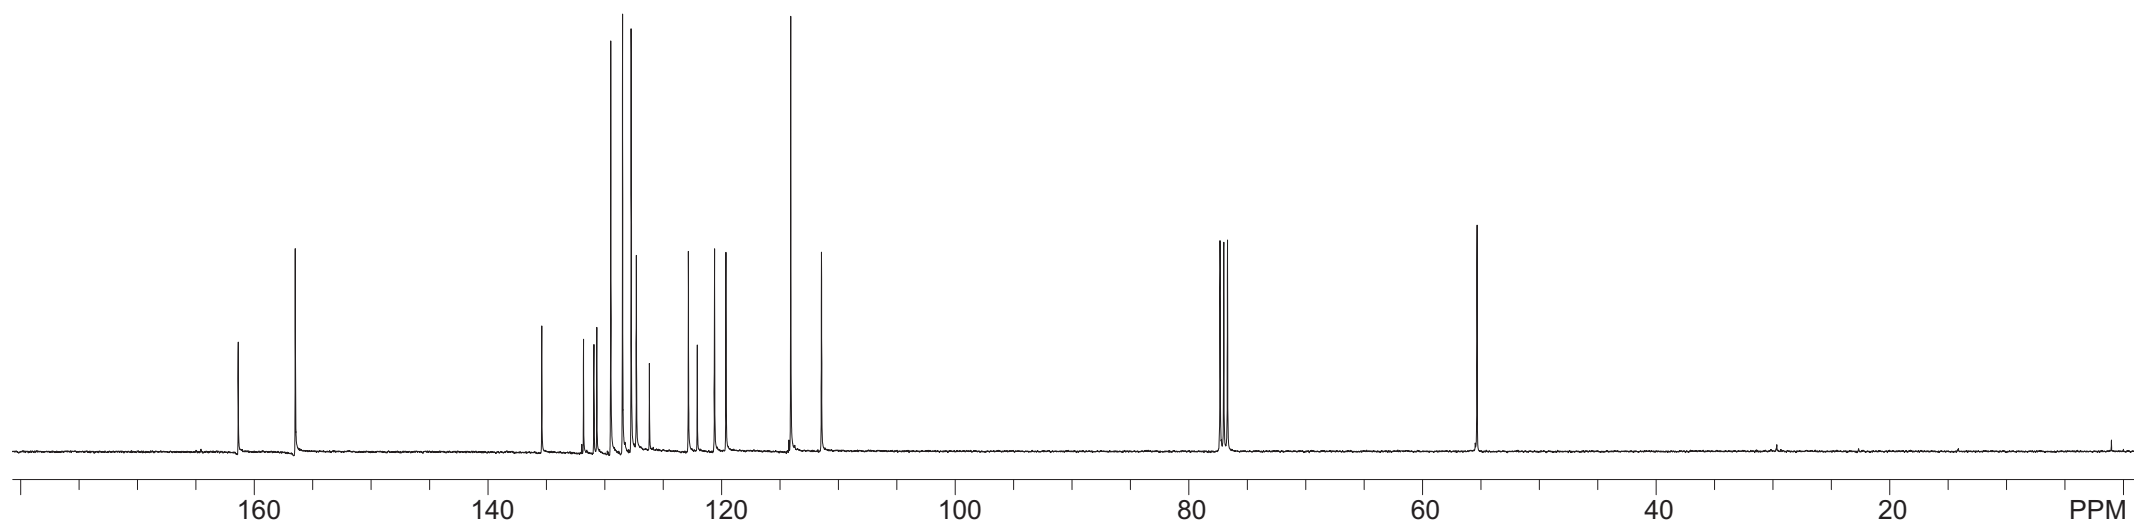

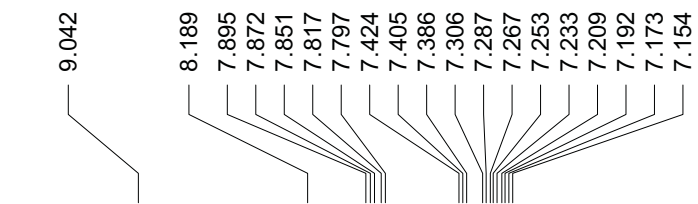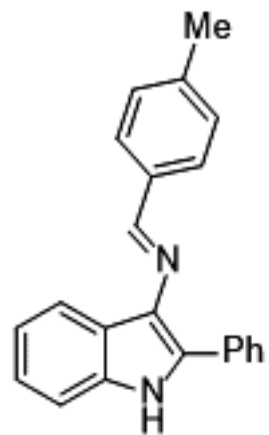

**3ac**

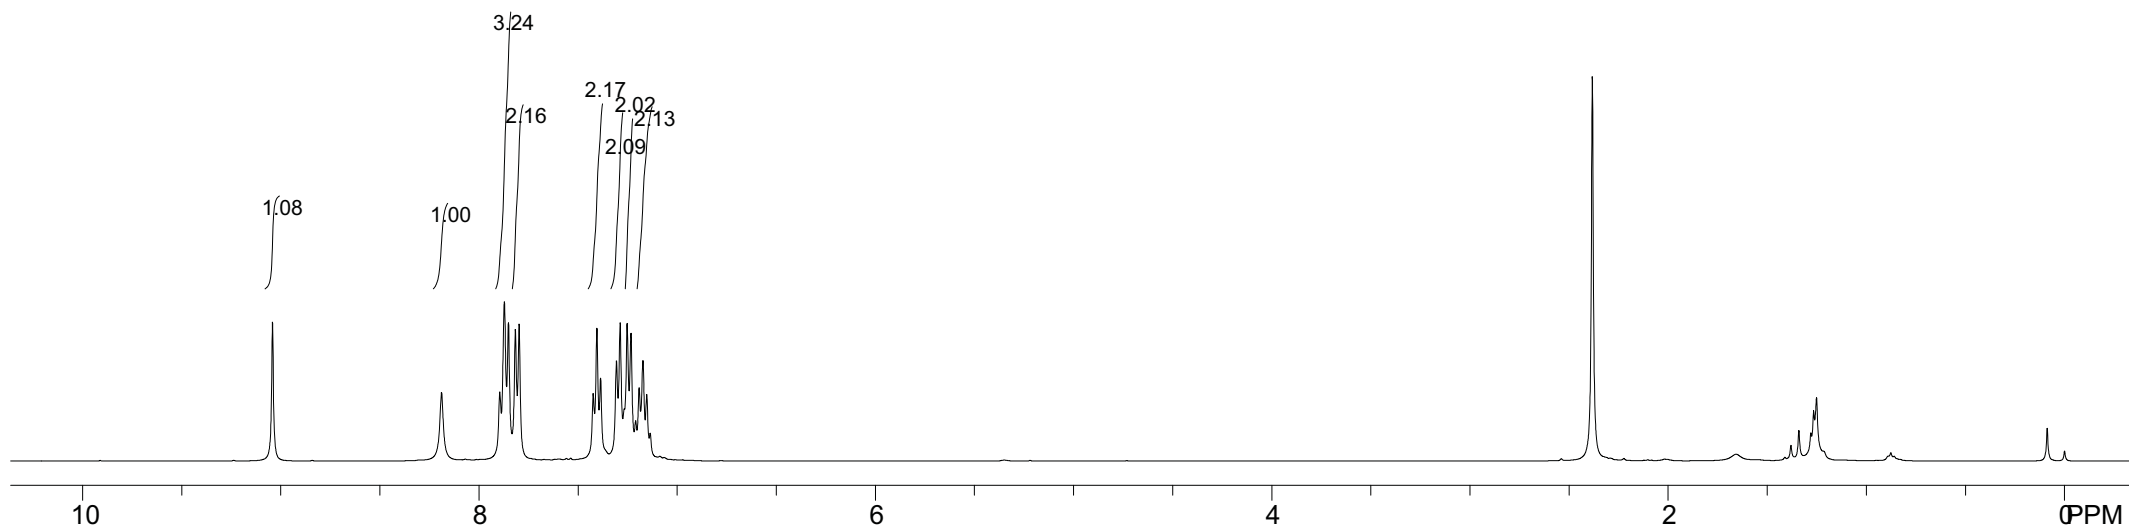

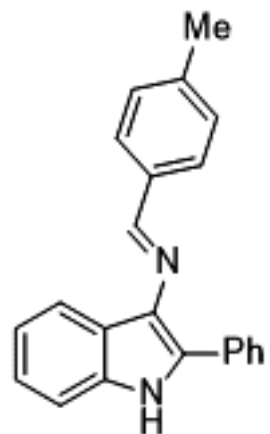

3ac

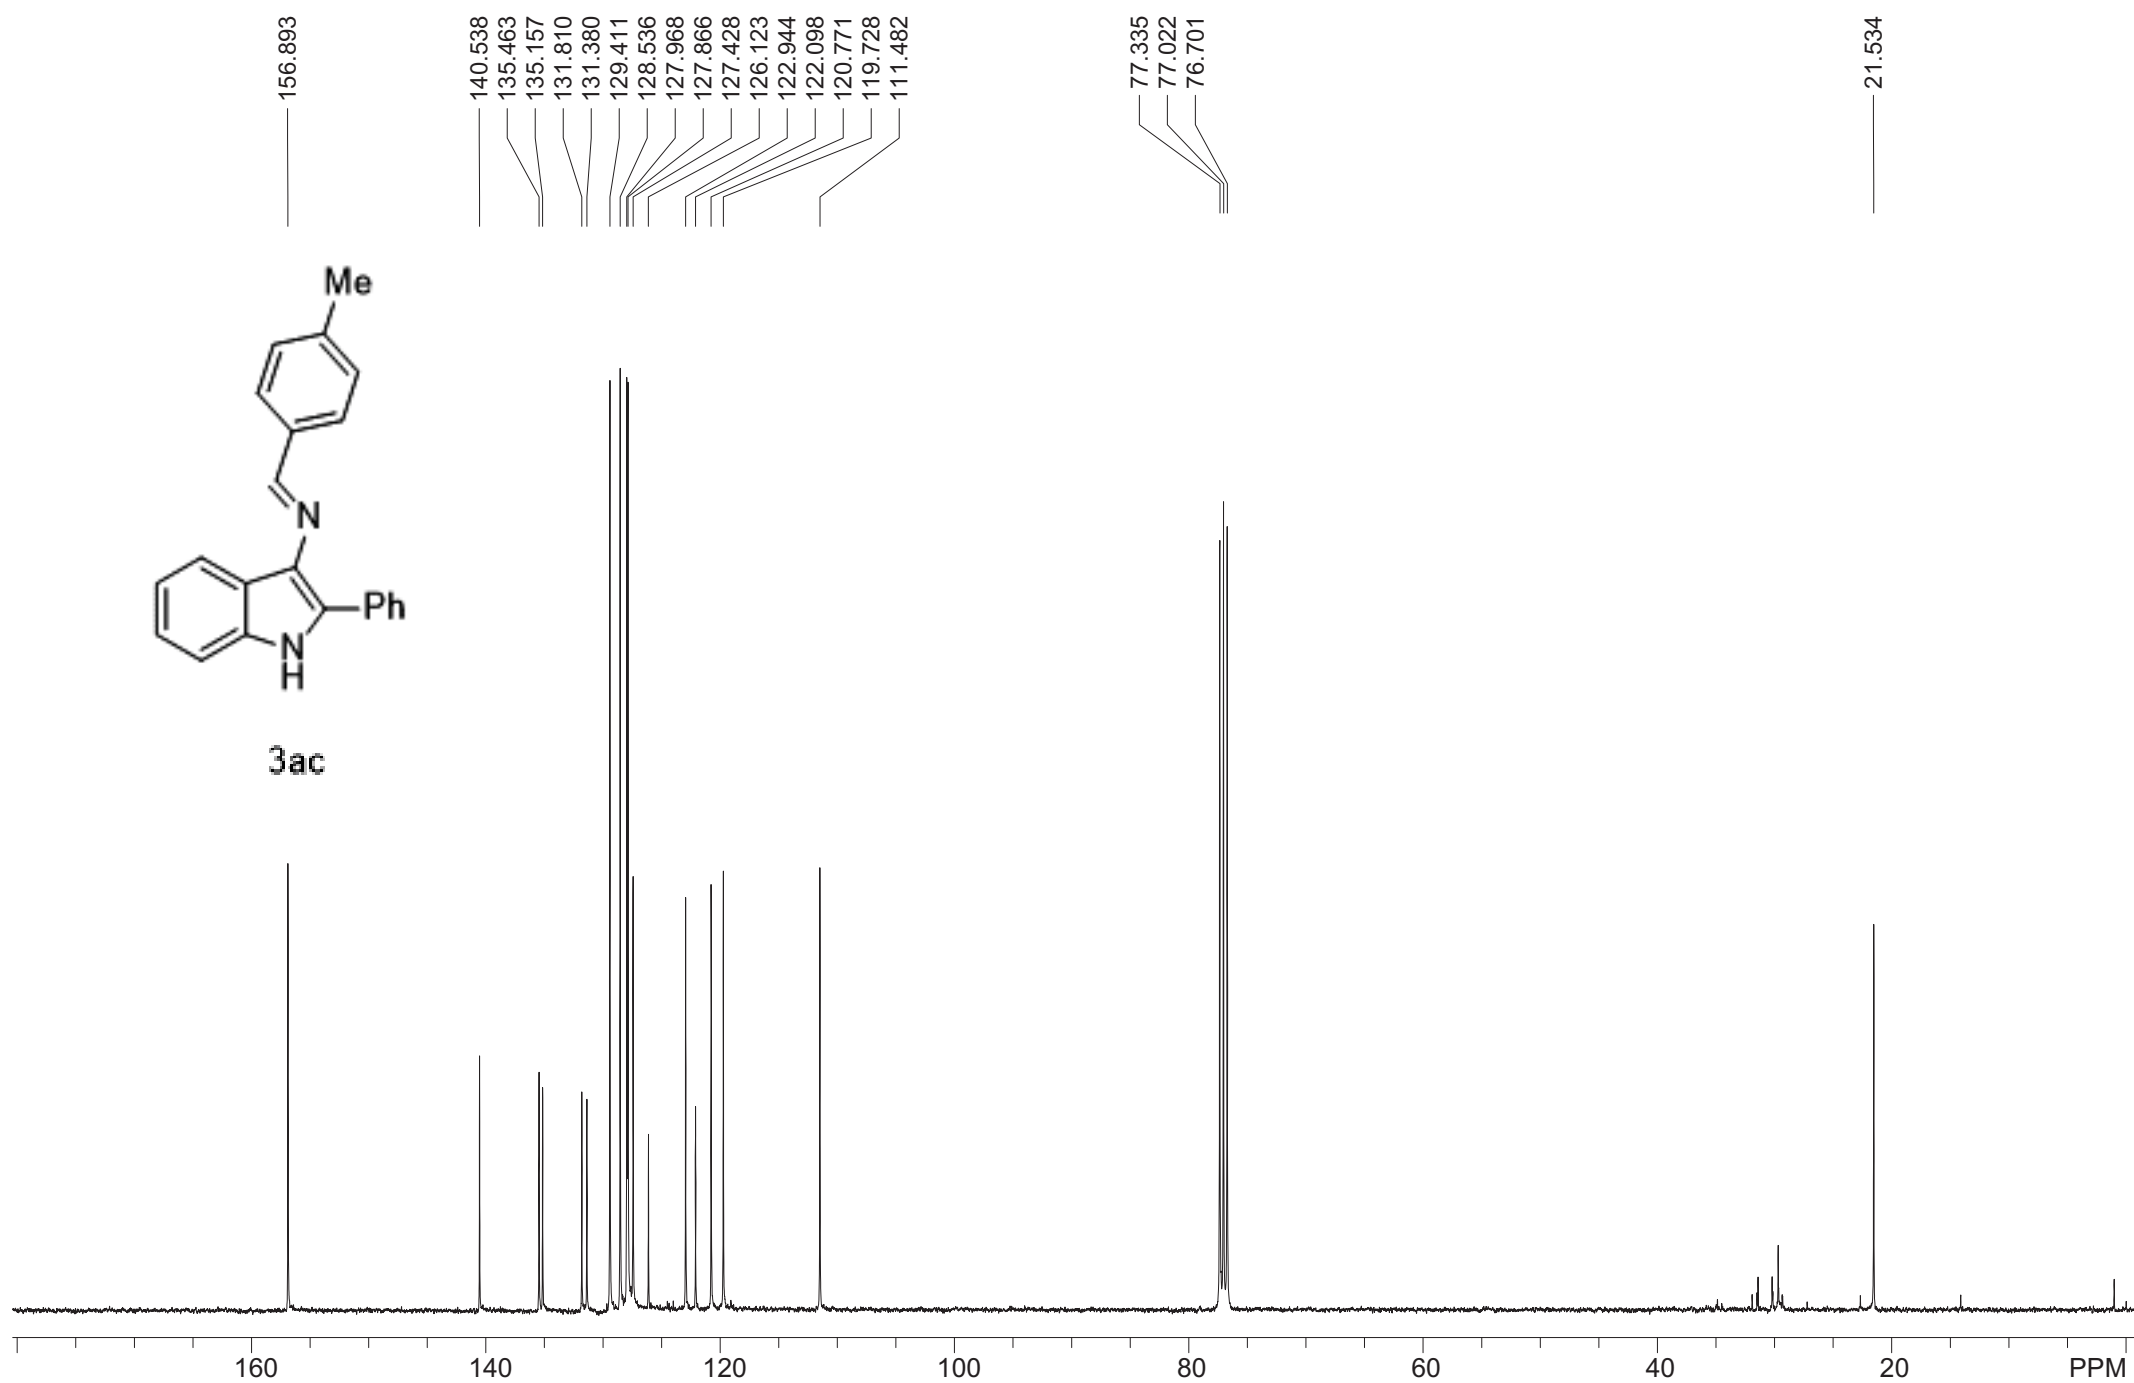



9.036  
8.222  
7.905  
7.875  
7.856  
7.824  
7.803  
7.463  
7.444  
7.425  
7.410  
7.389  
7.347  
7.328  
7.242  
7.224  
7.216  
7.199  
7.178  
7.161

0.000

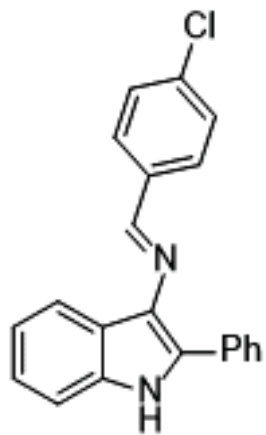

3ad

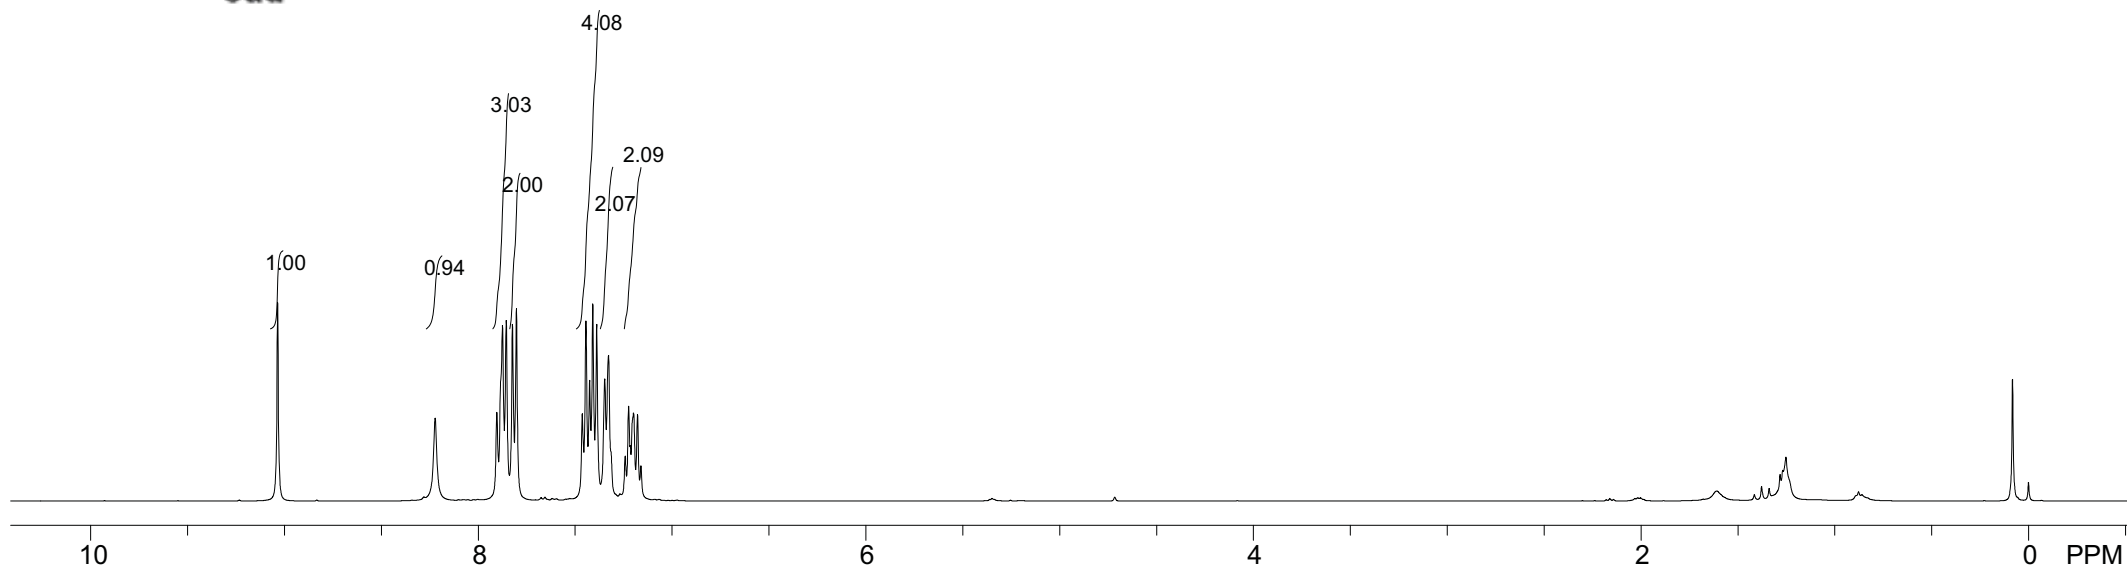

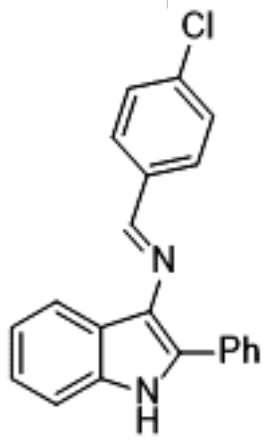

3ad

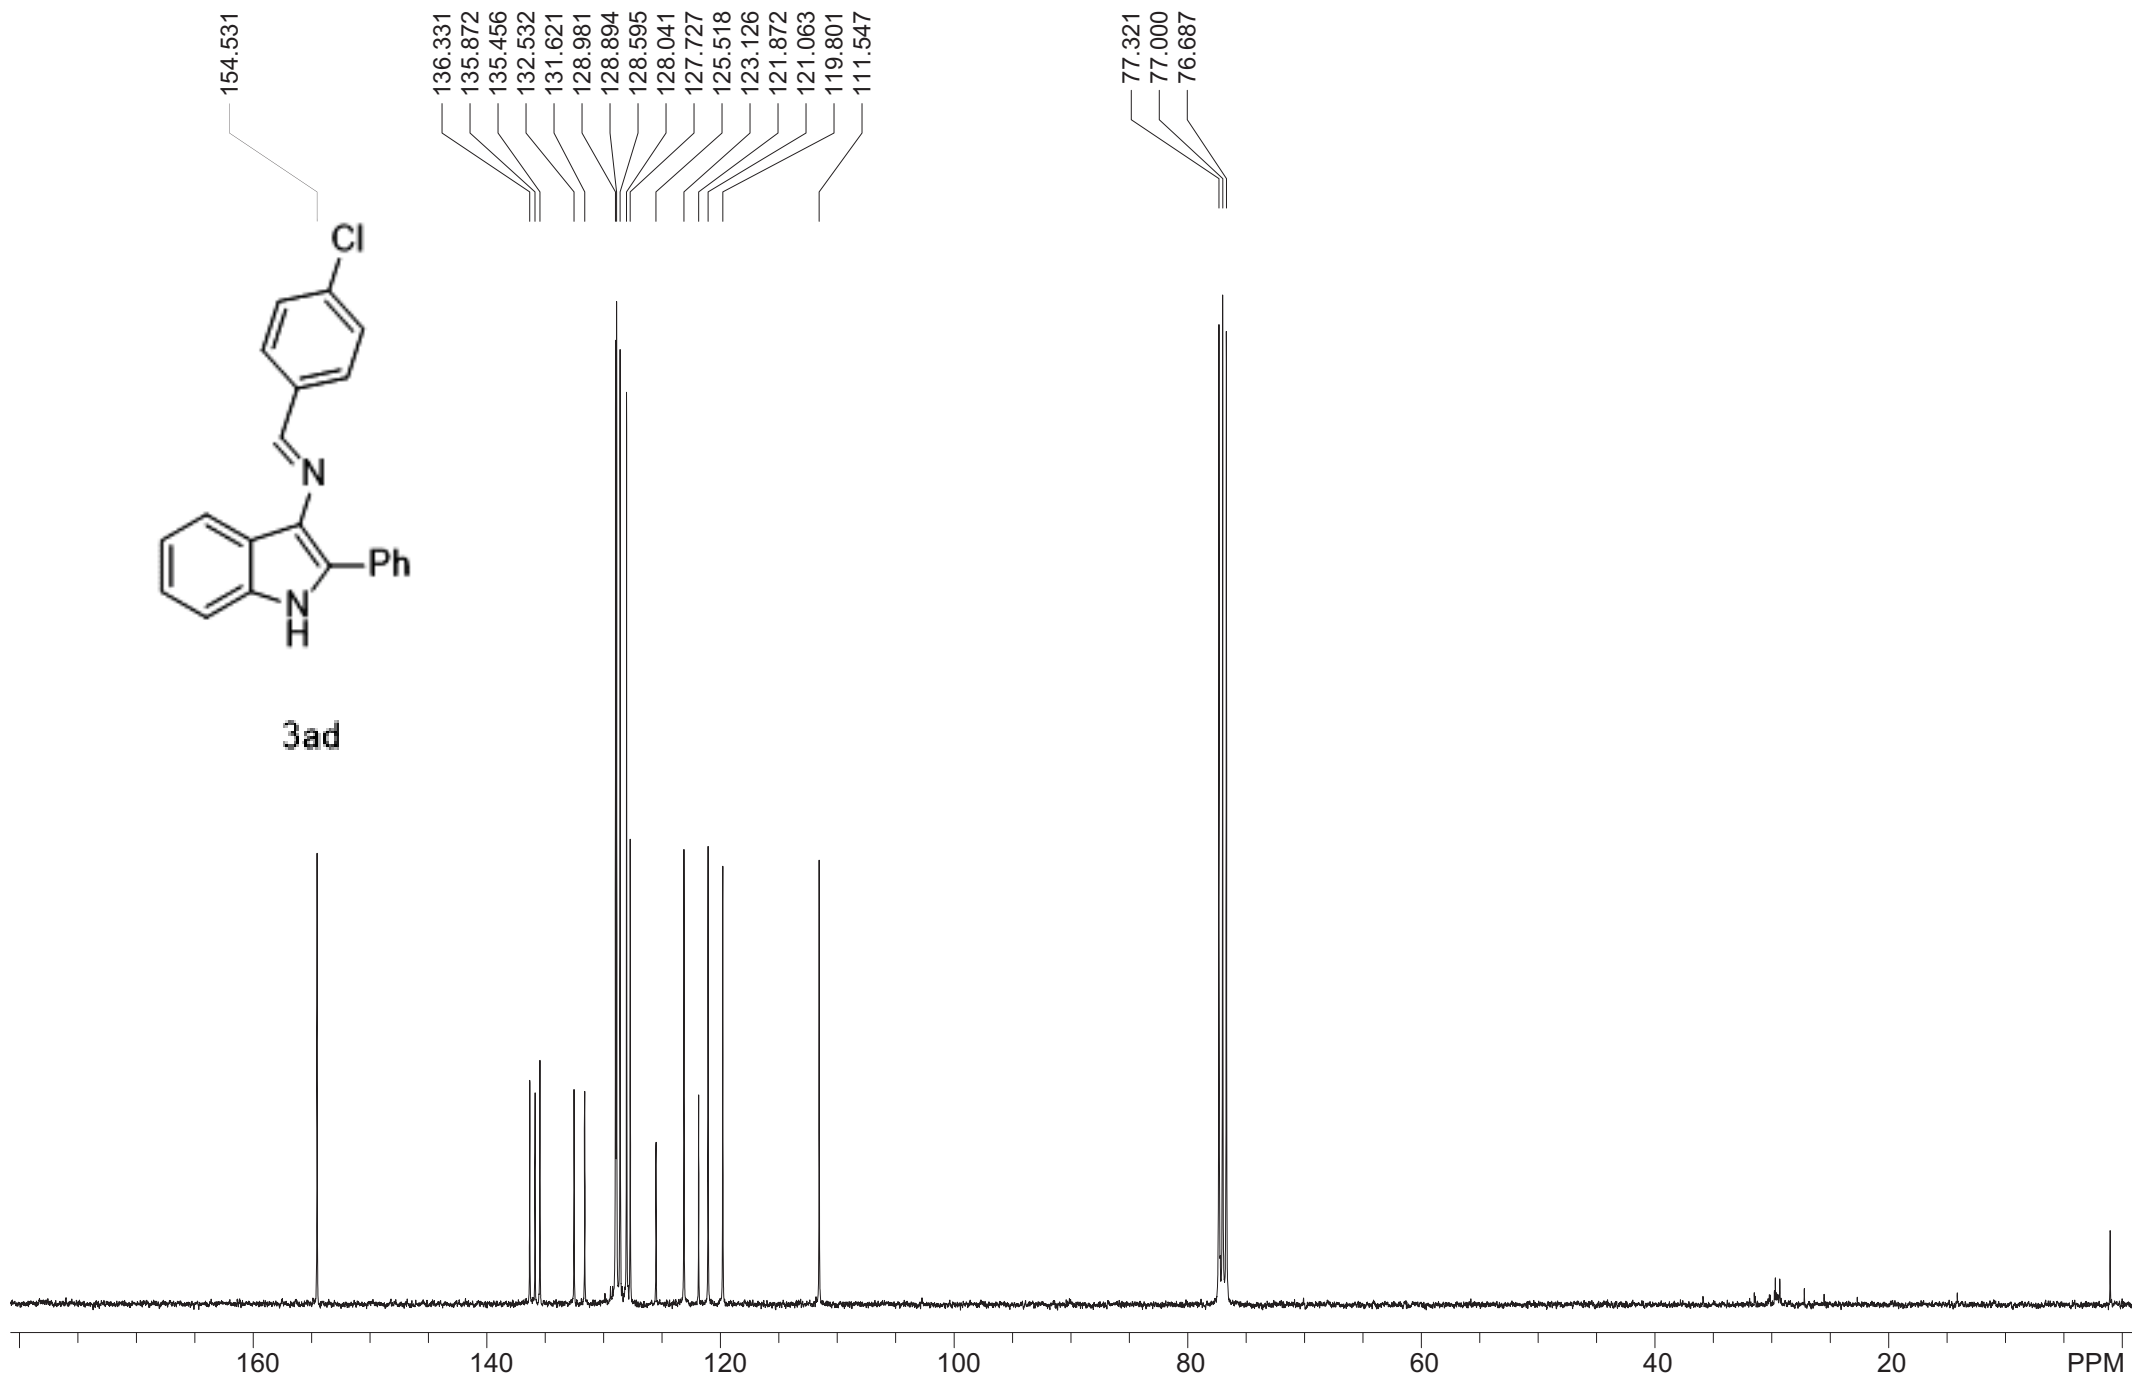

8.967  
8.164  
7.867  
7.848  
7.822  
7.803  
7.711  
7.690  
7.530  
7.510  
7.425  
7.407  
7.388  
7.322  
7.304  
7.283  
7.263  
7.210  
7.193  
7.174  
7.155  
7.137

0.000

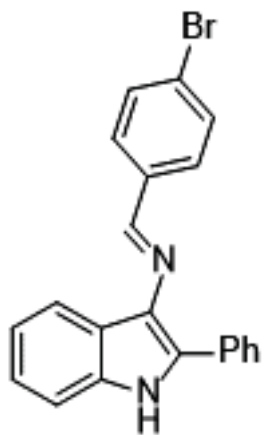

3ae

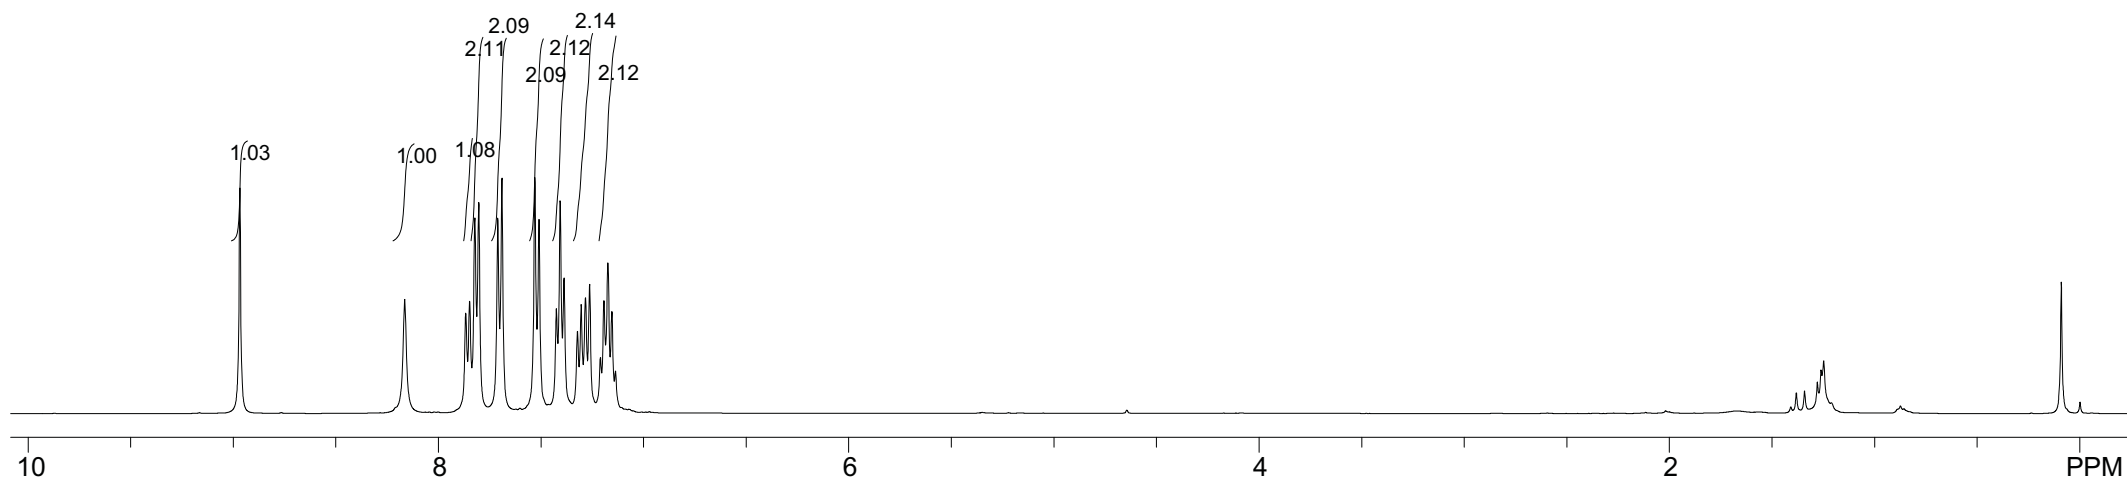

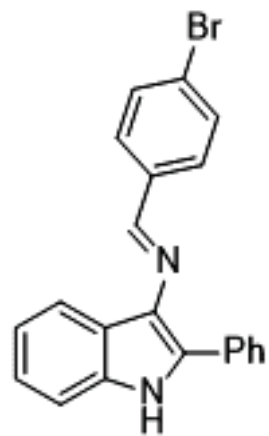

3ae

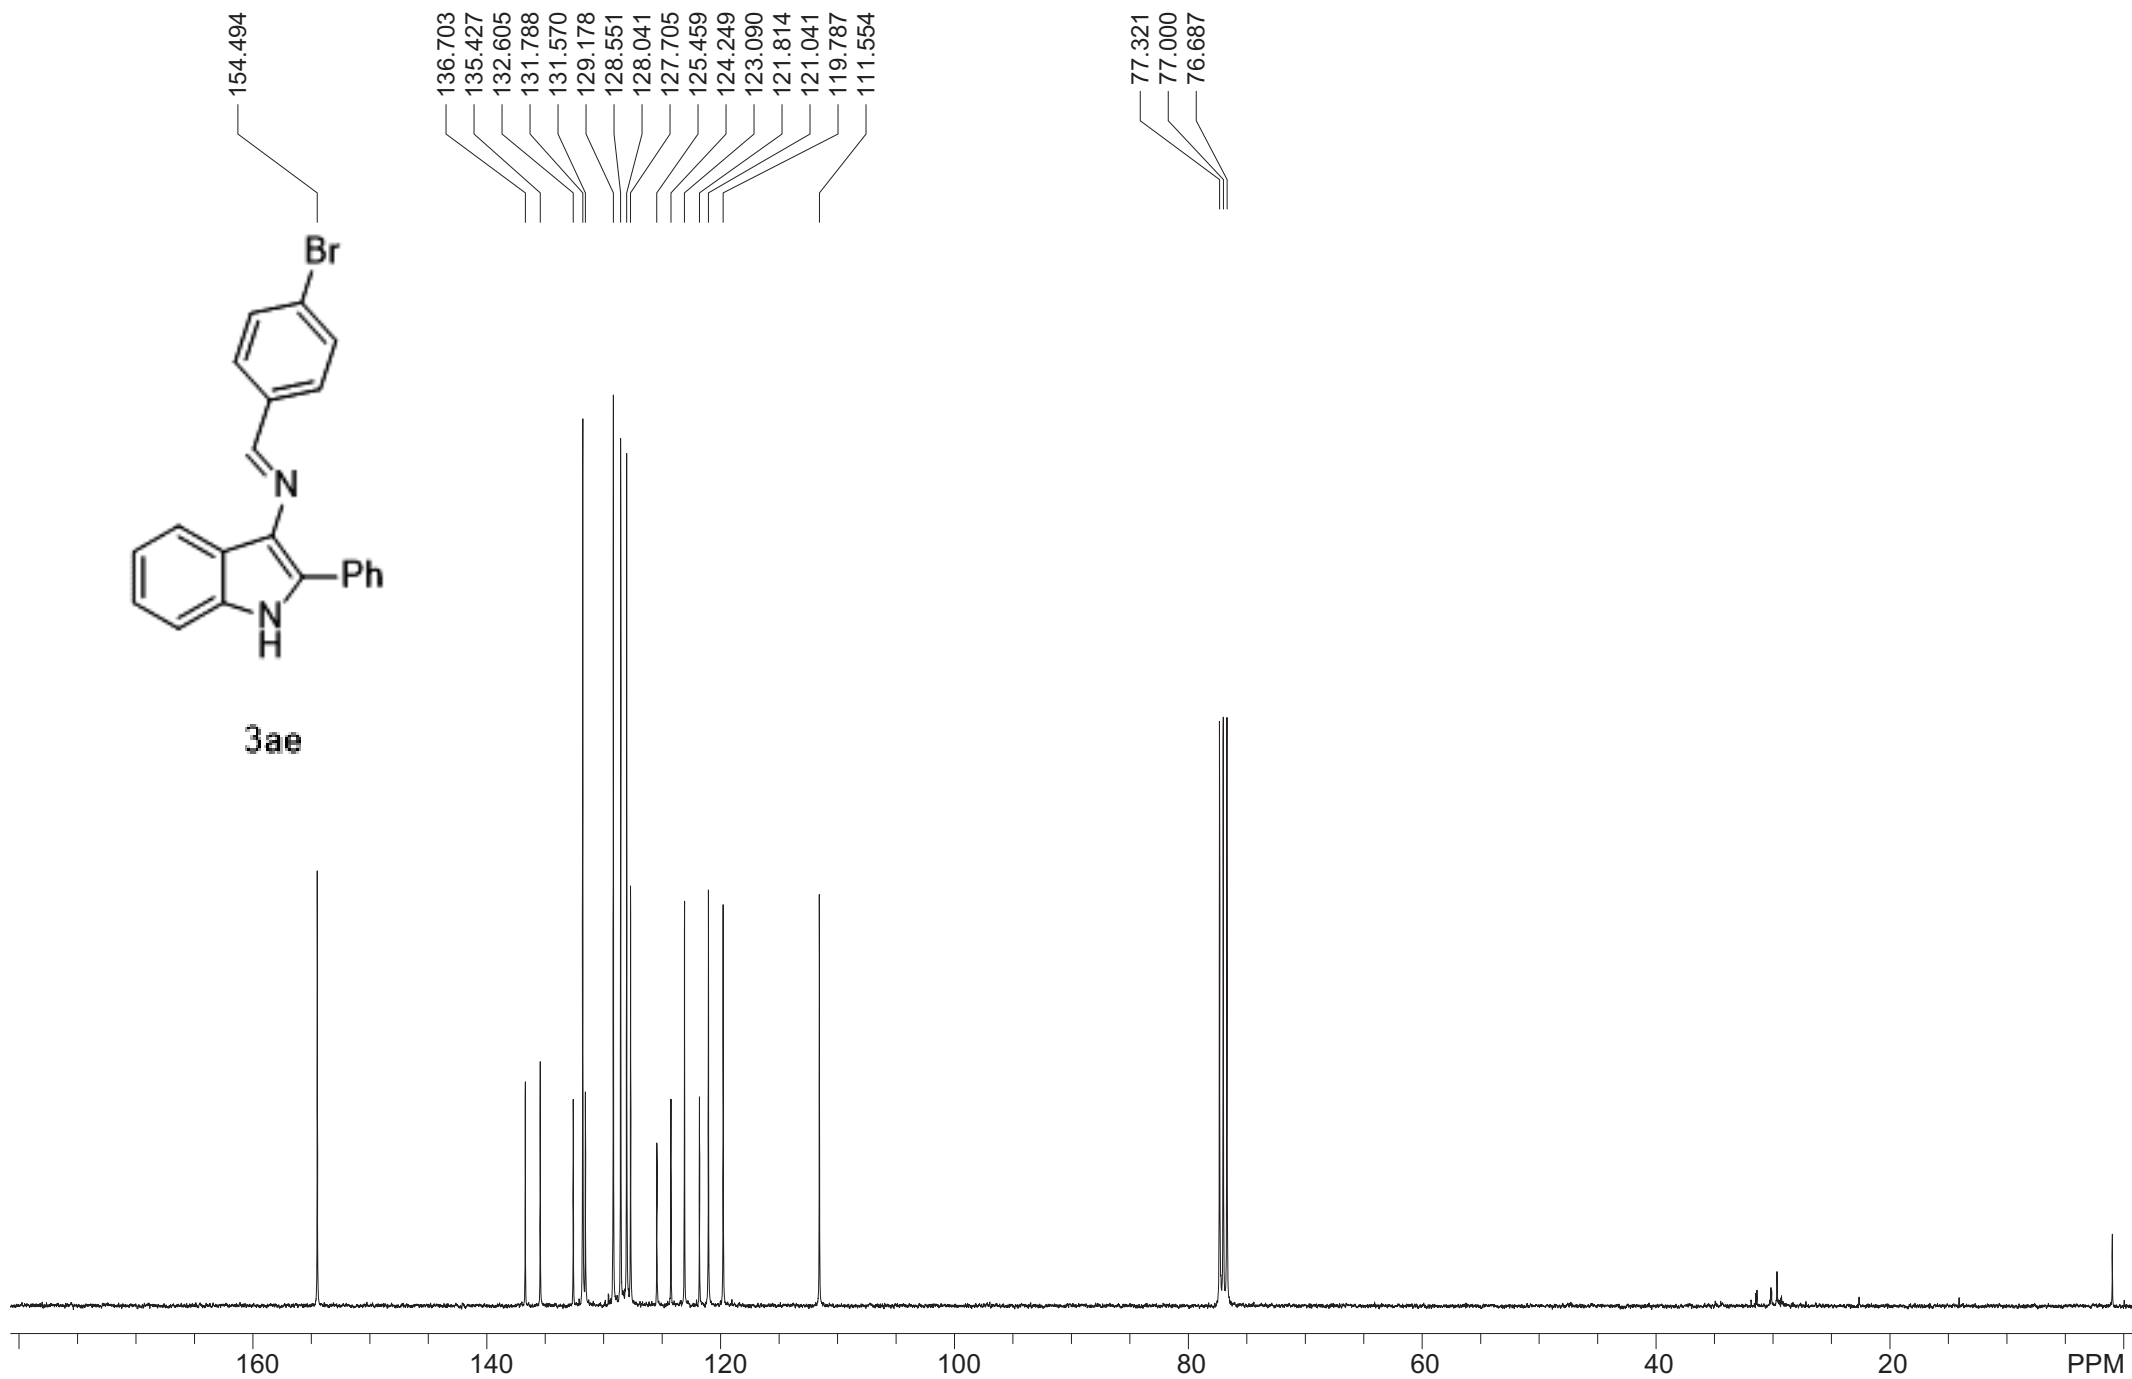

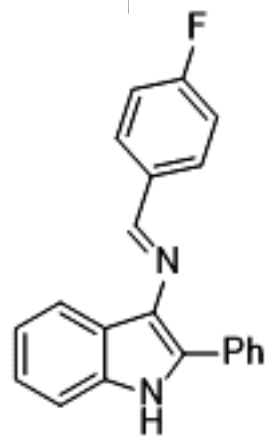

3af

9.043  
7.898  
8.207  
7.877  
7.859  
7.458  
7.440  
7.421  
7.341  
7.322  
7.306  
7.237  
7.219  
7.194  
7.173  
7.154  
7.144  
7.123  
7.102

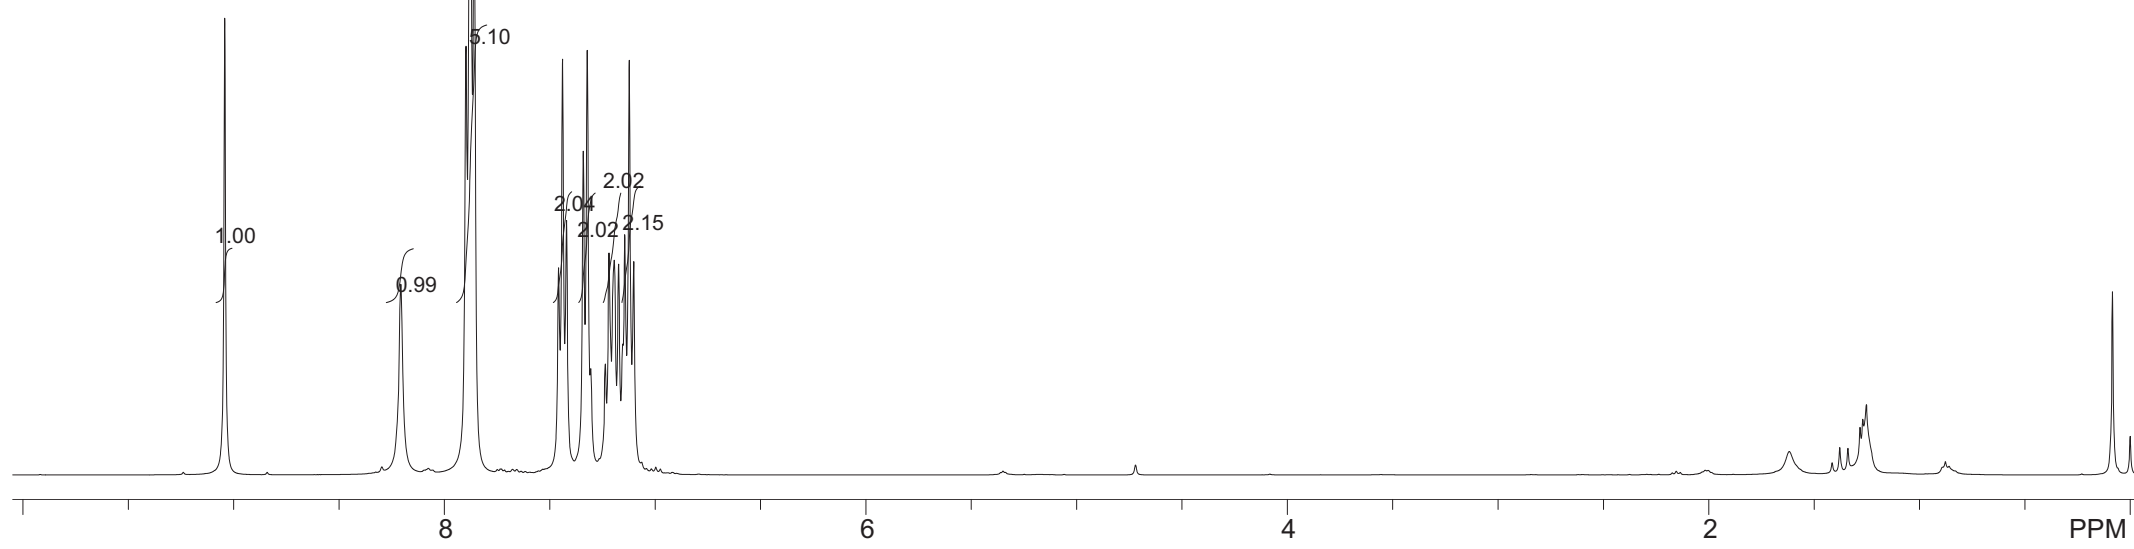

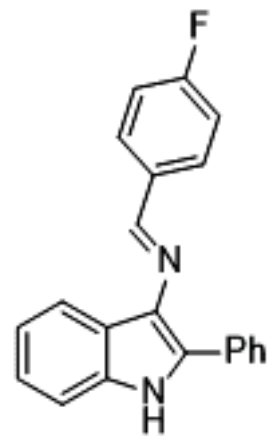

3af

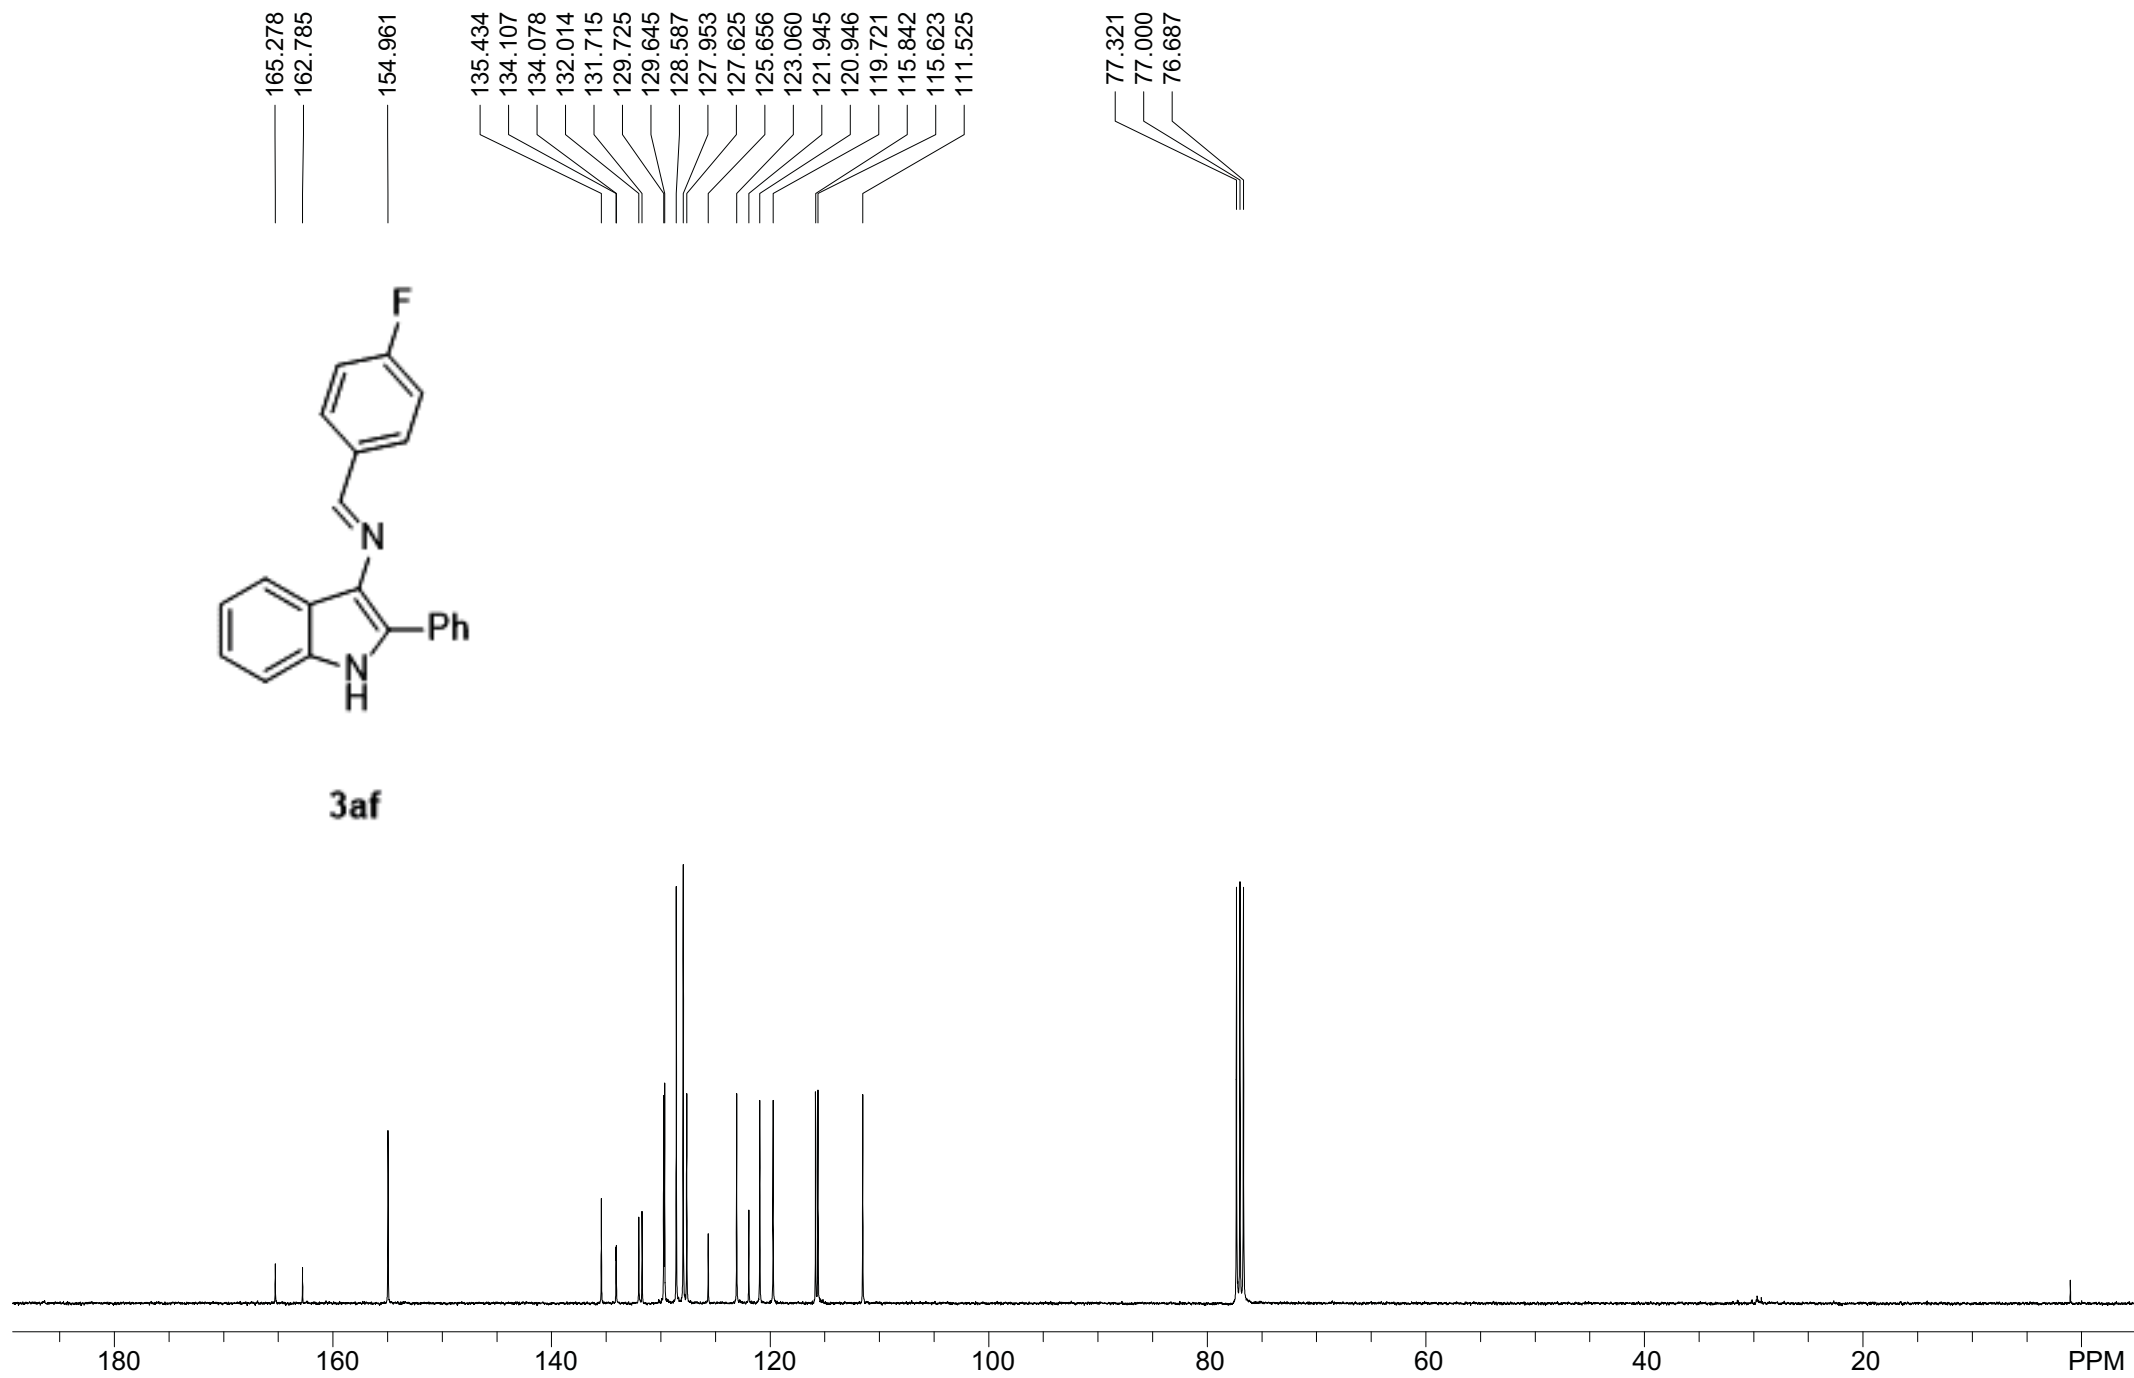

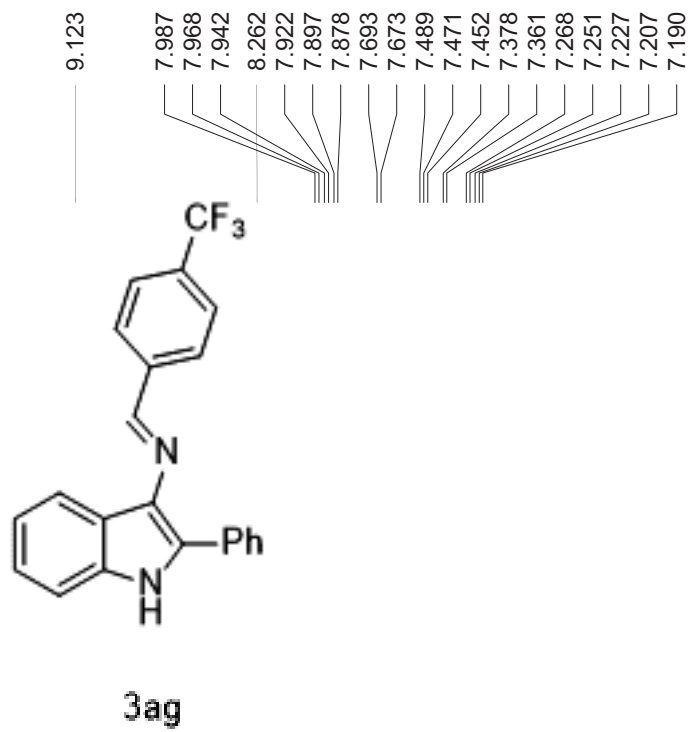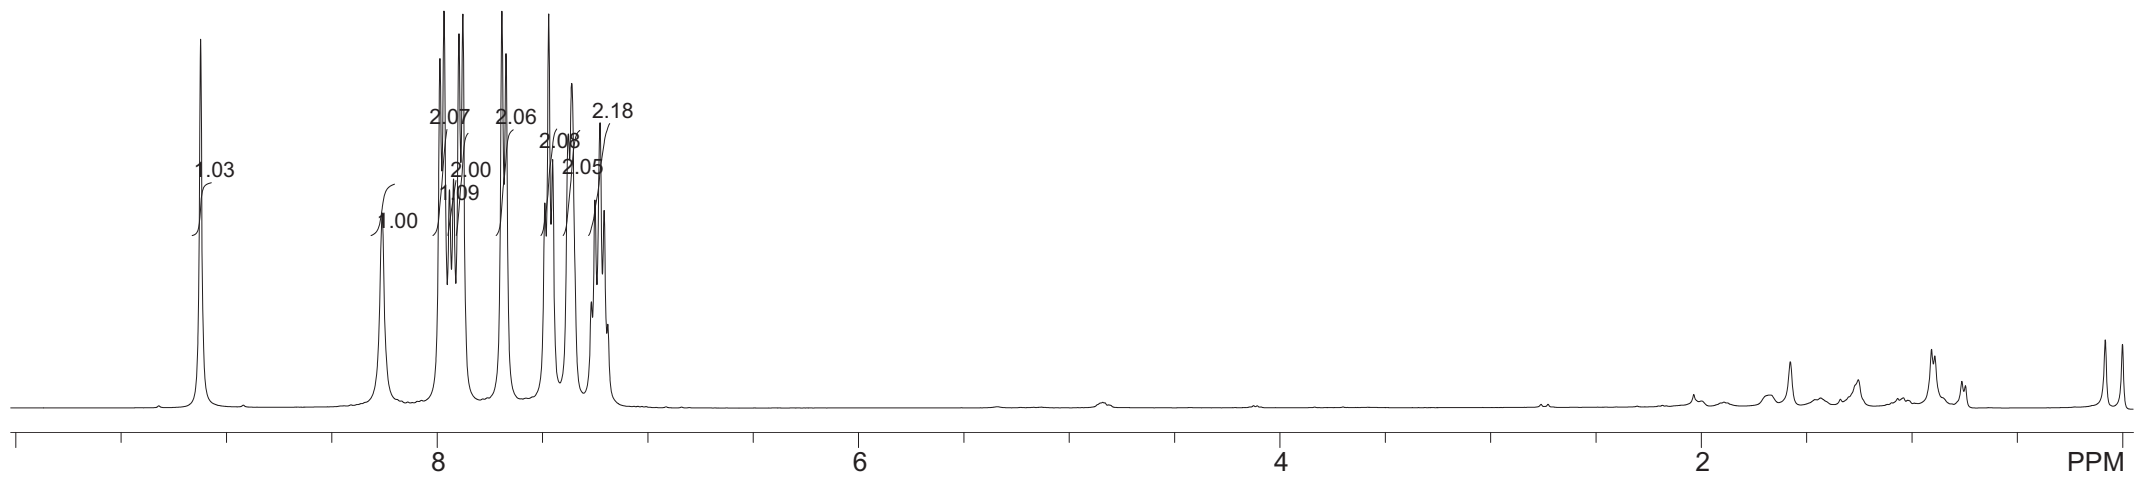

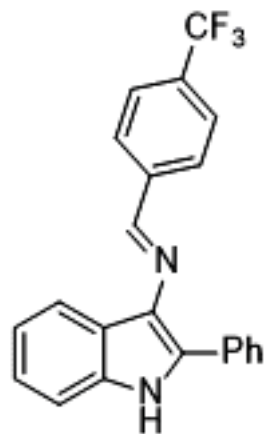

3ag

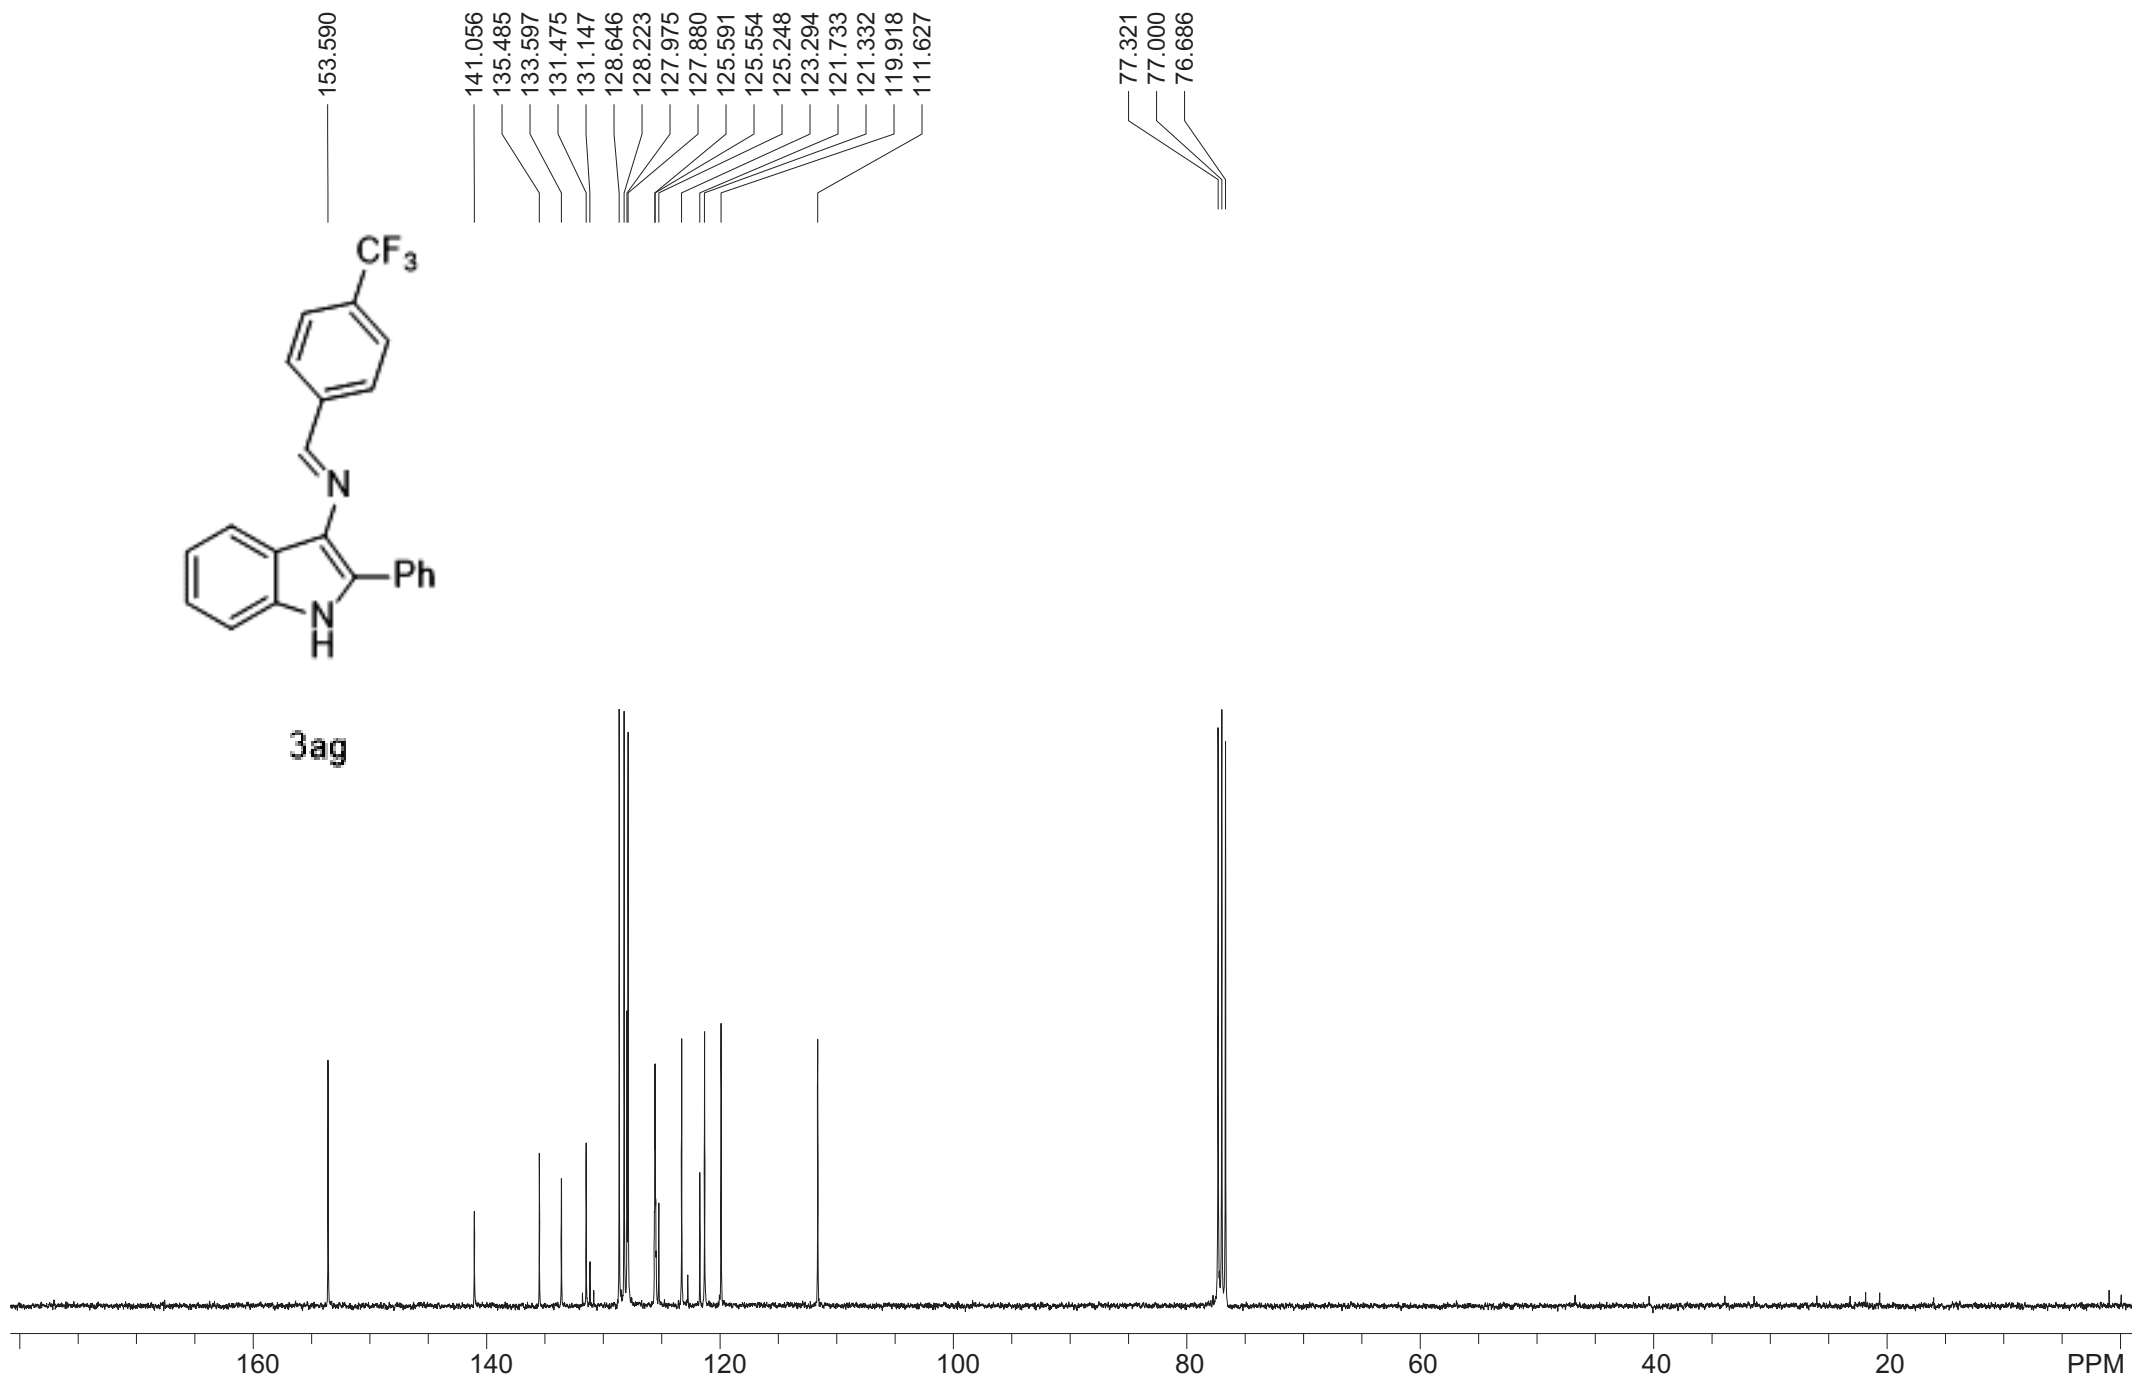



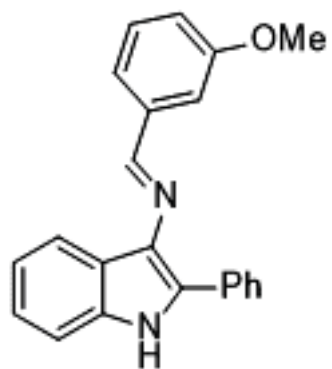

3ah

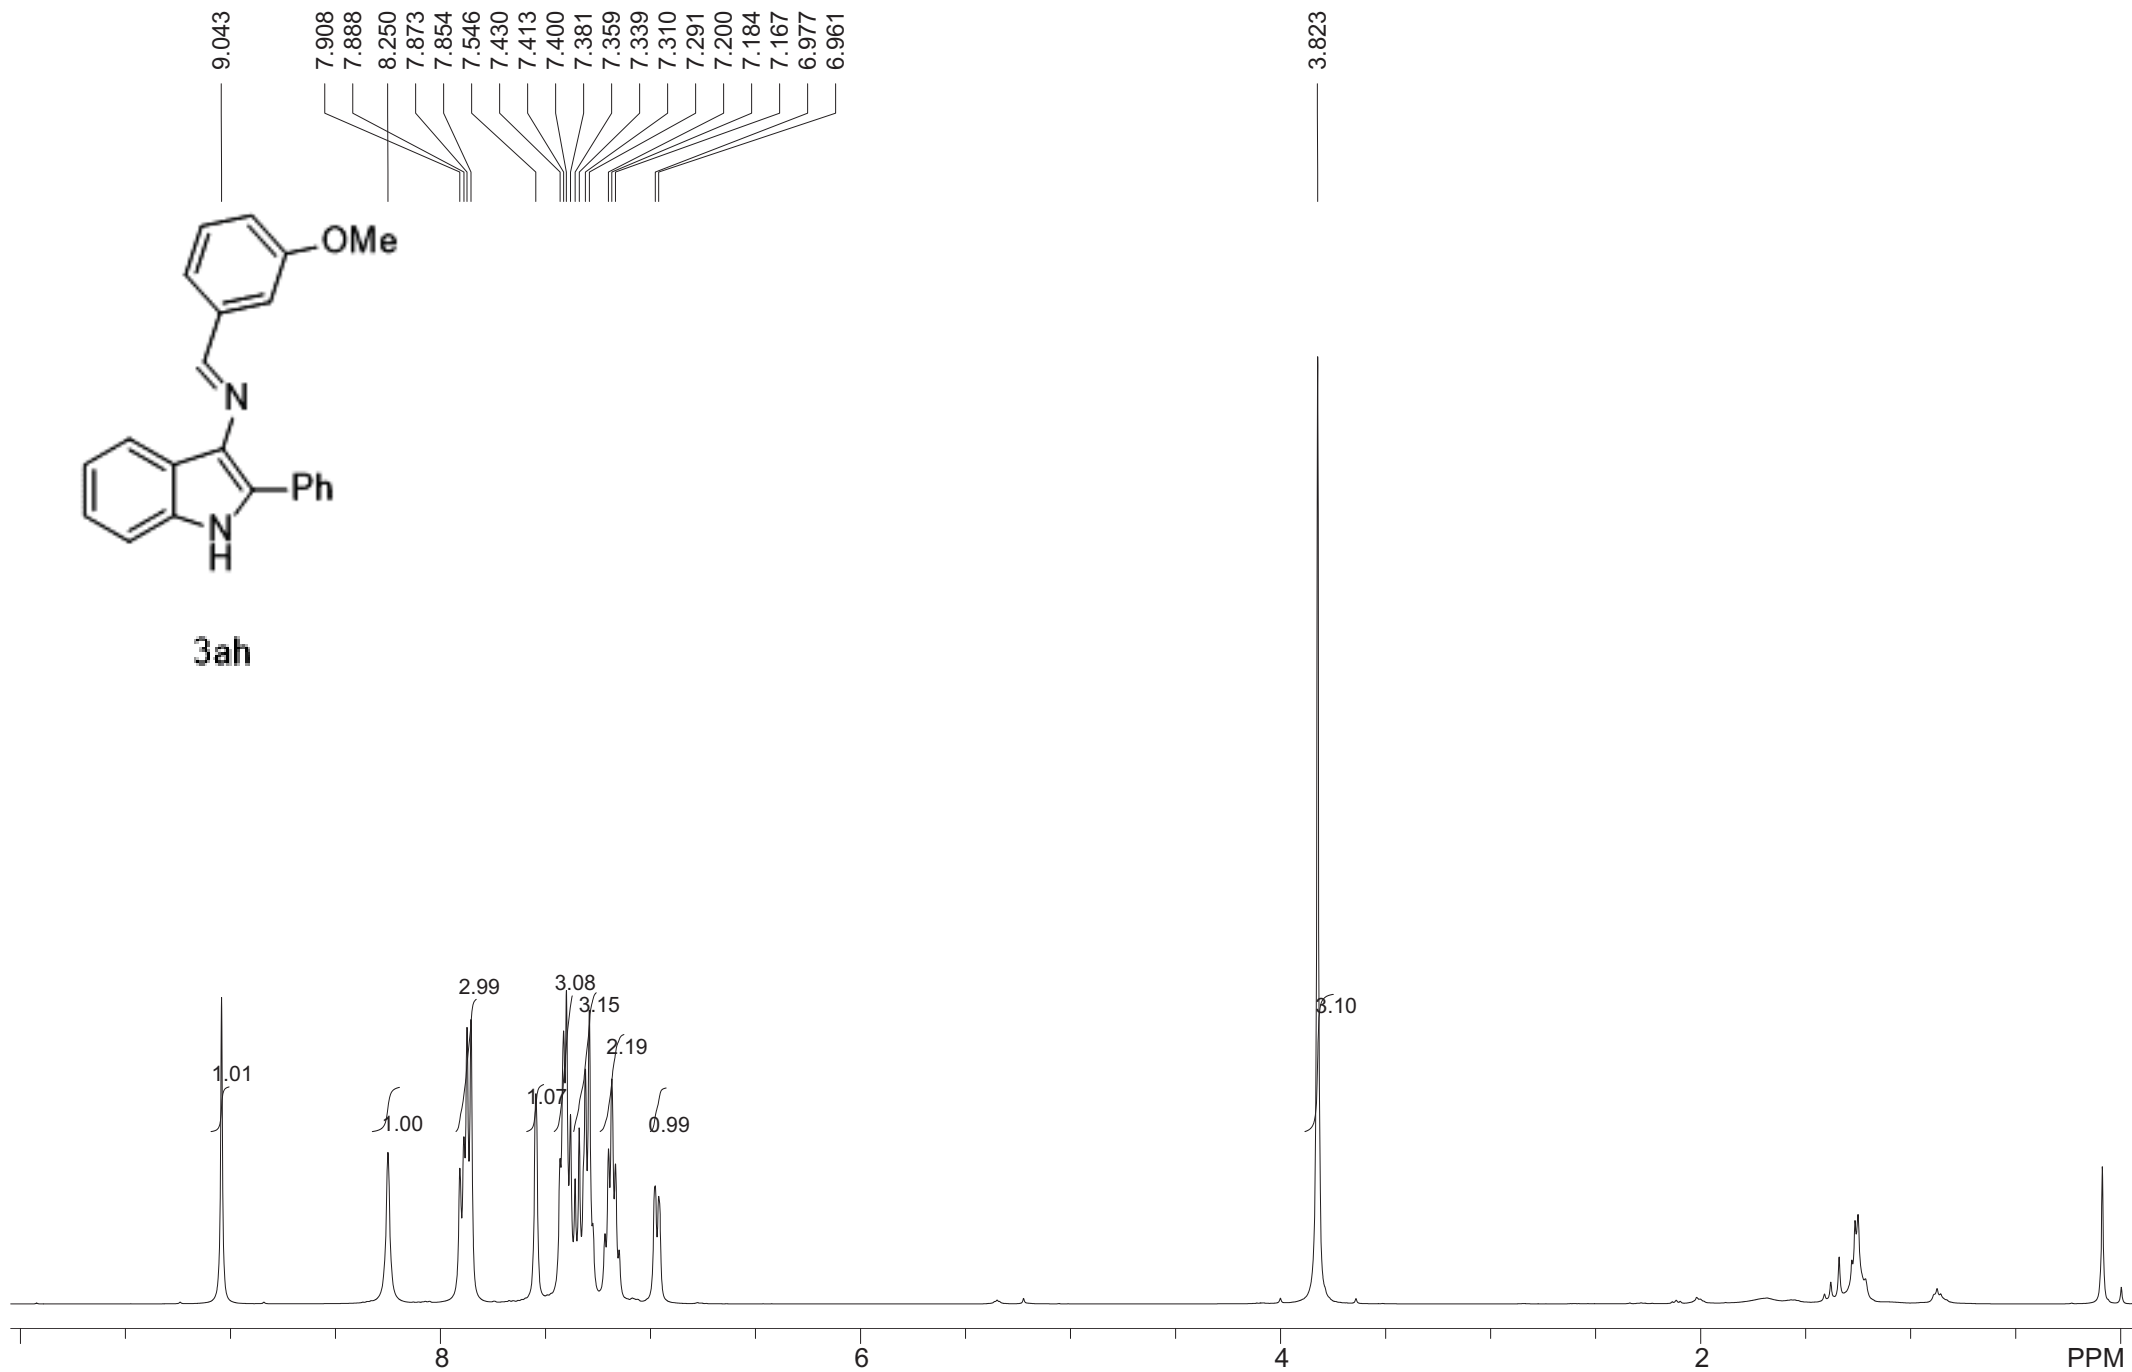

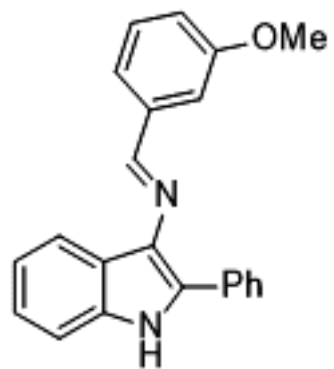

3ah

159.904  
156.076

139.291  
135.456  
132.102  
131.672  
129.594  
128.471  
128.011  
127.559  
125.671  
123.009  
121.952  
121.340  
120.909  
119.757  
116.863  
111.518  
111.299

77.321  
77.000  
76.687

55.235

150 100 50 PPM

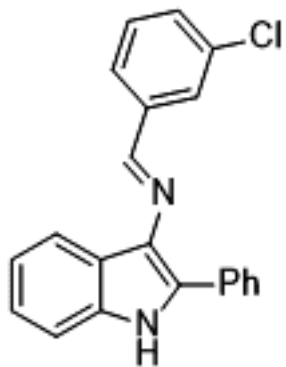

3ai

9.035  
7.917  
7.898  
8.245  
7.876  
7.754  
7.744  
7.736  
7.488  
7.469  
7.450  
7.370  
7.355  
7.336  
7.257  
7.240  
7.223  
7.214  
7.193  
7.176

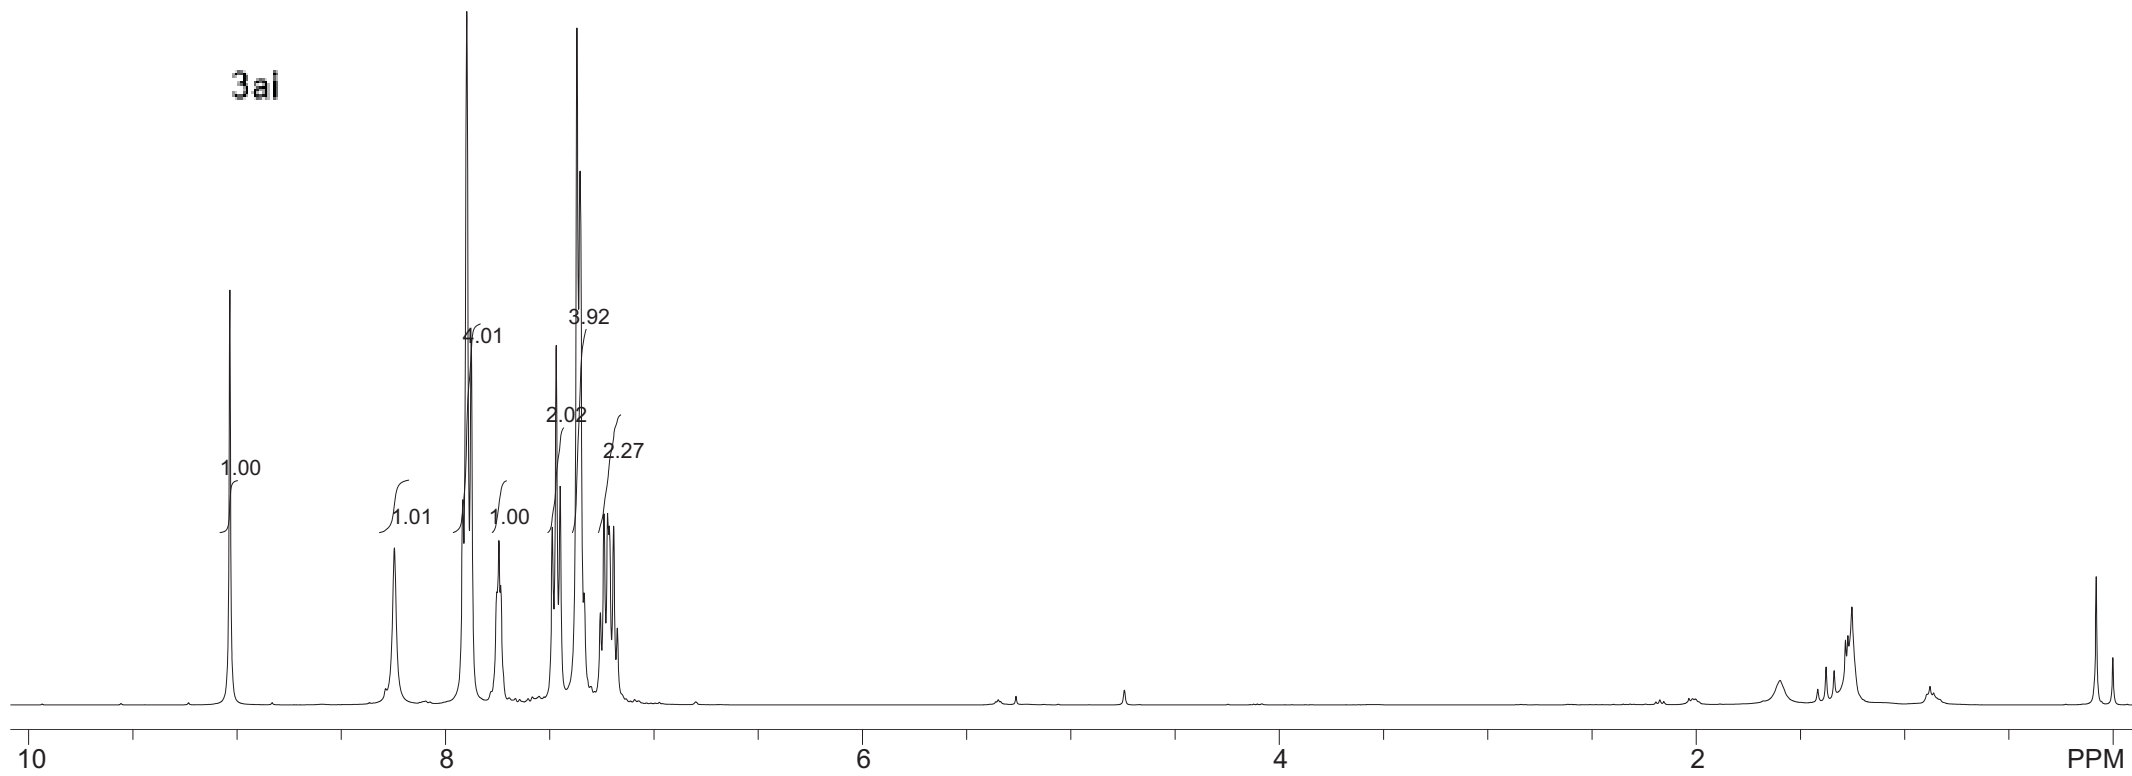

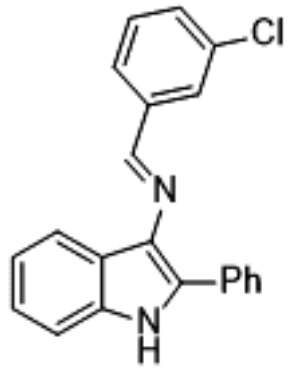

3ai

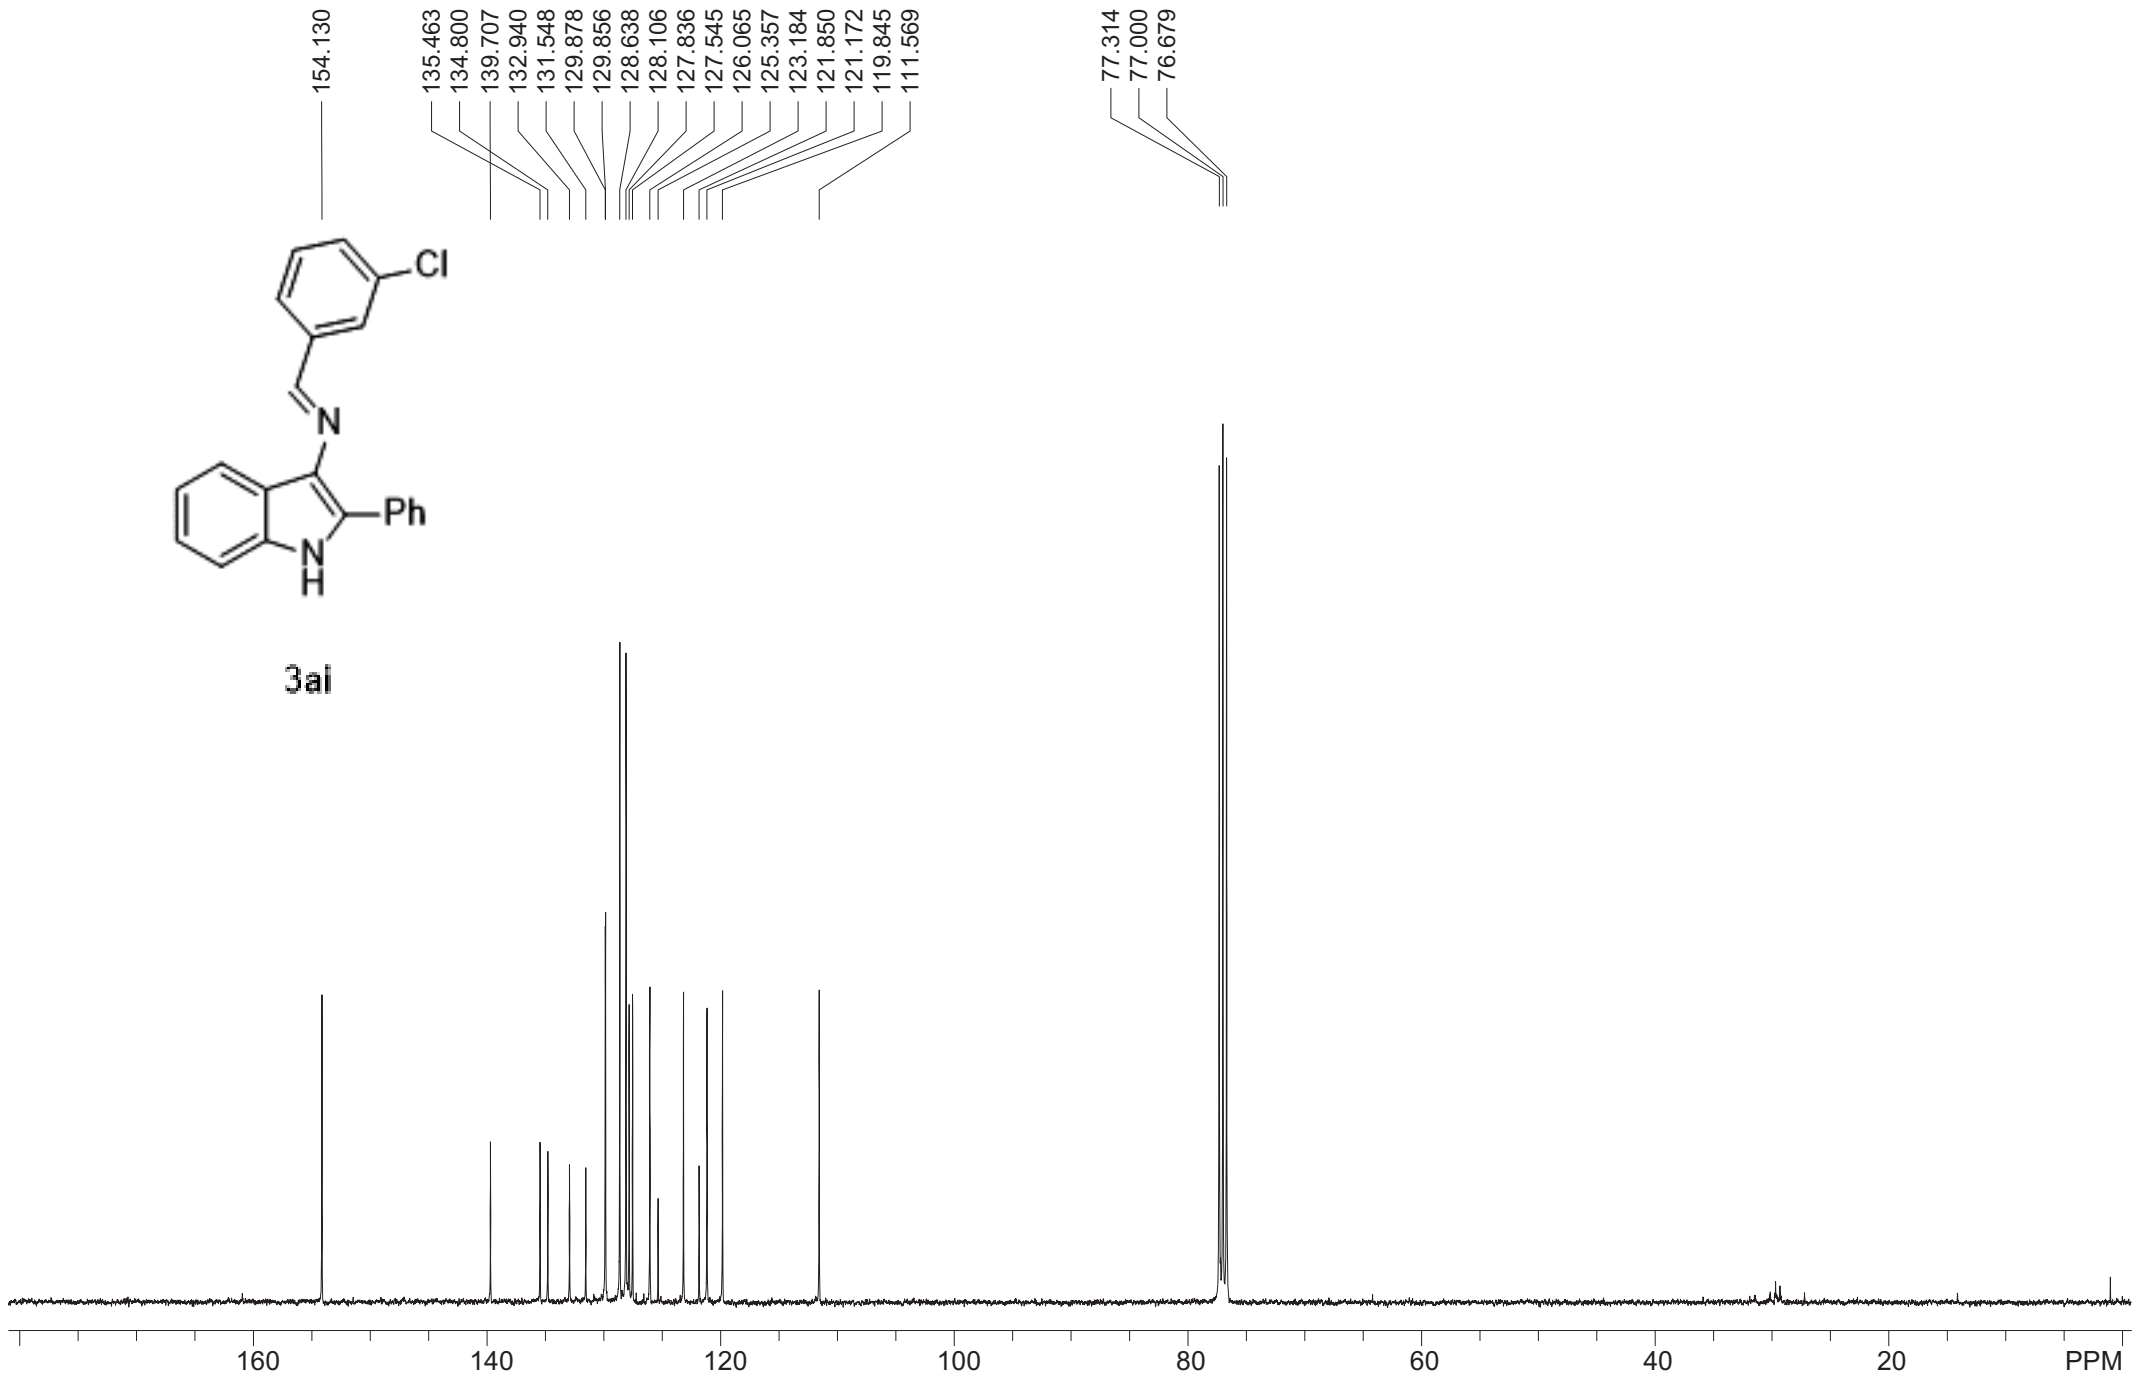

9.550  
 8.254  
 8.234  
 7.976  
 7.945  
 7.925  
 7.471  
 7.452  
 7.433  
 7.408  
 7.388  
 7.377  
 7.359  
 7.337  
 7.319  
 7.300  
 7.248  
 7.231  
 7.212  
 7.193  
 7.176  
 7.069  
 7.050  
 7.032  
 6.969  
 6.948

3.924

0.000

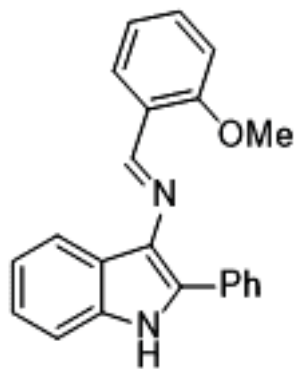

**3aj**

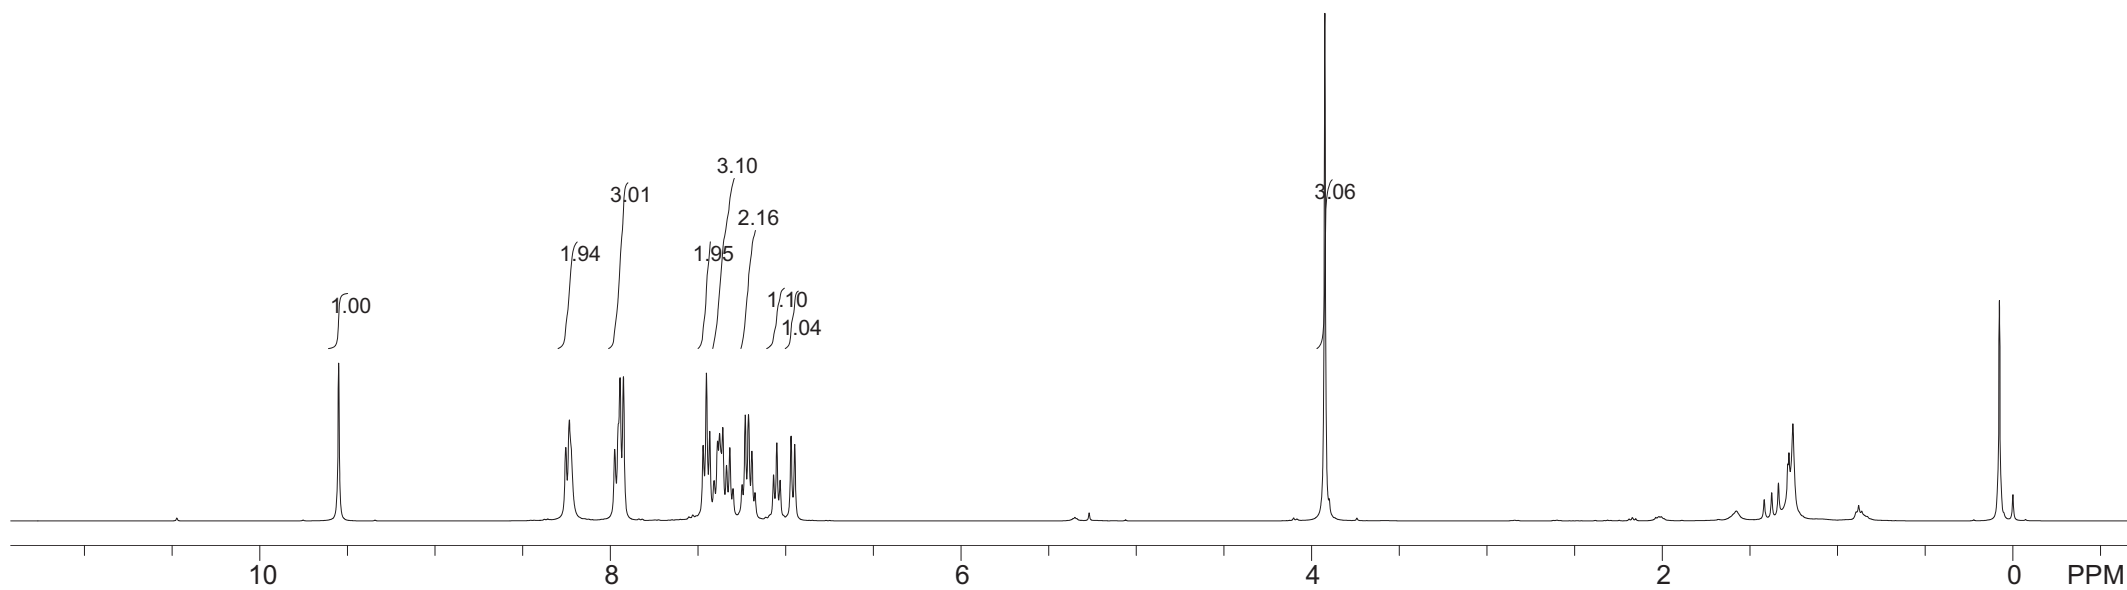

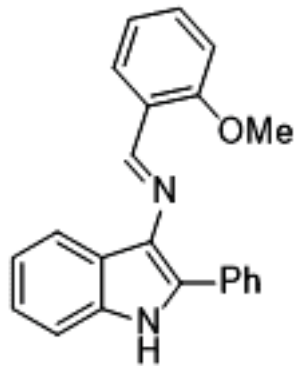

3aj

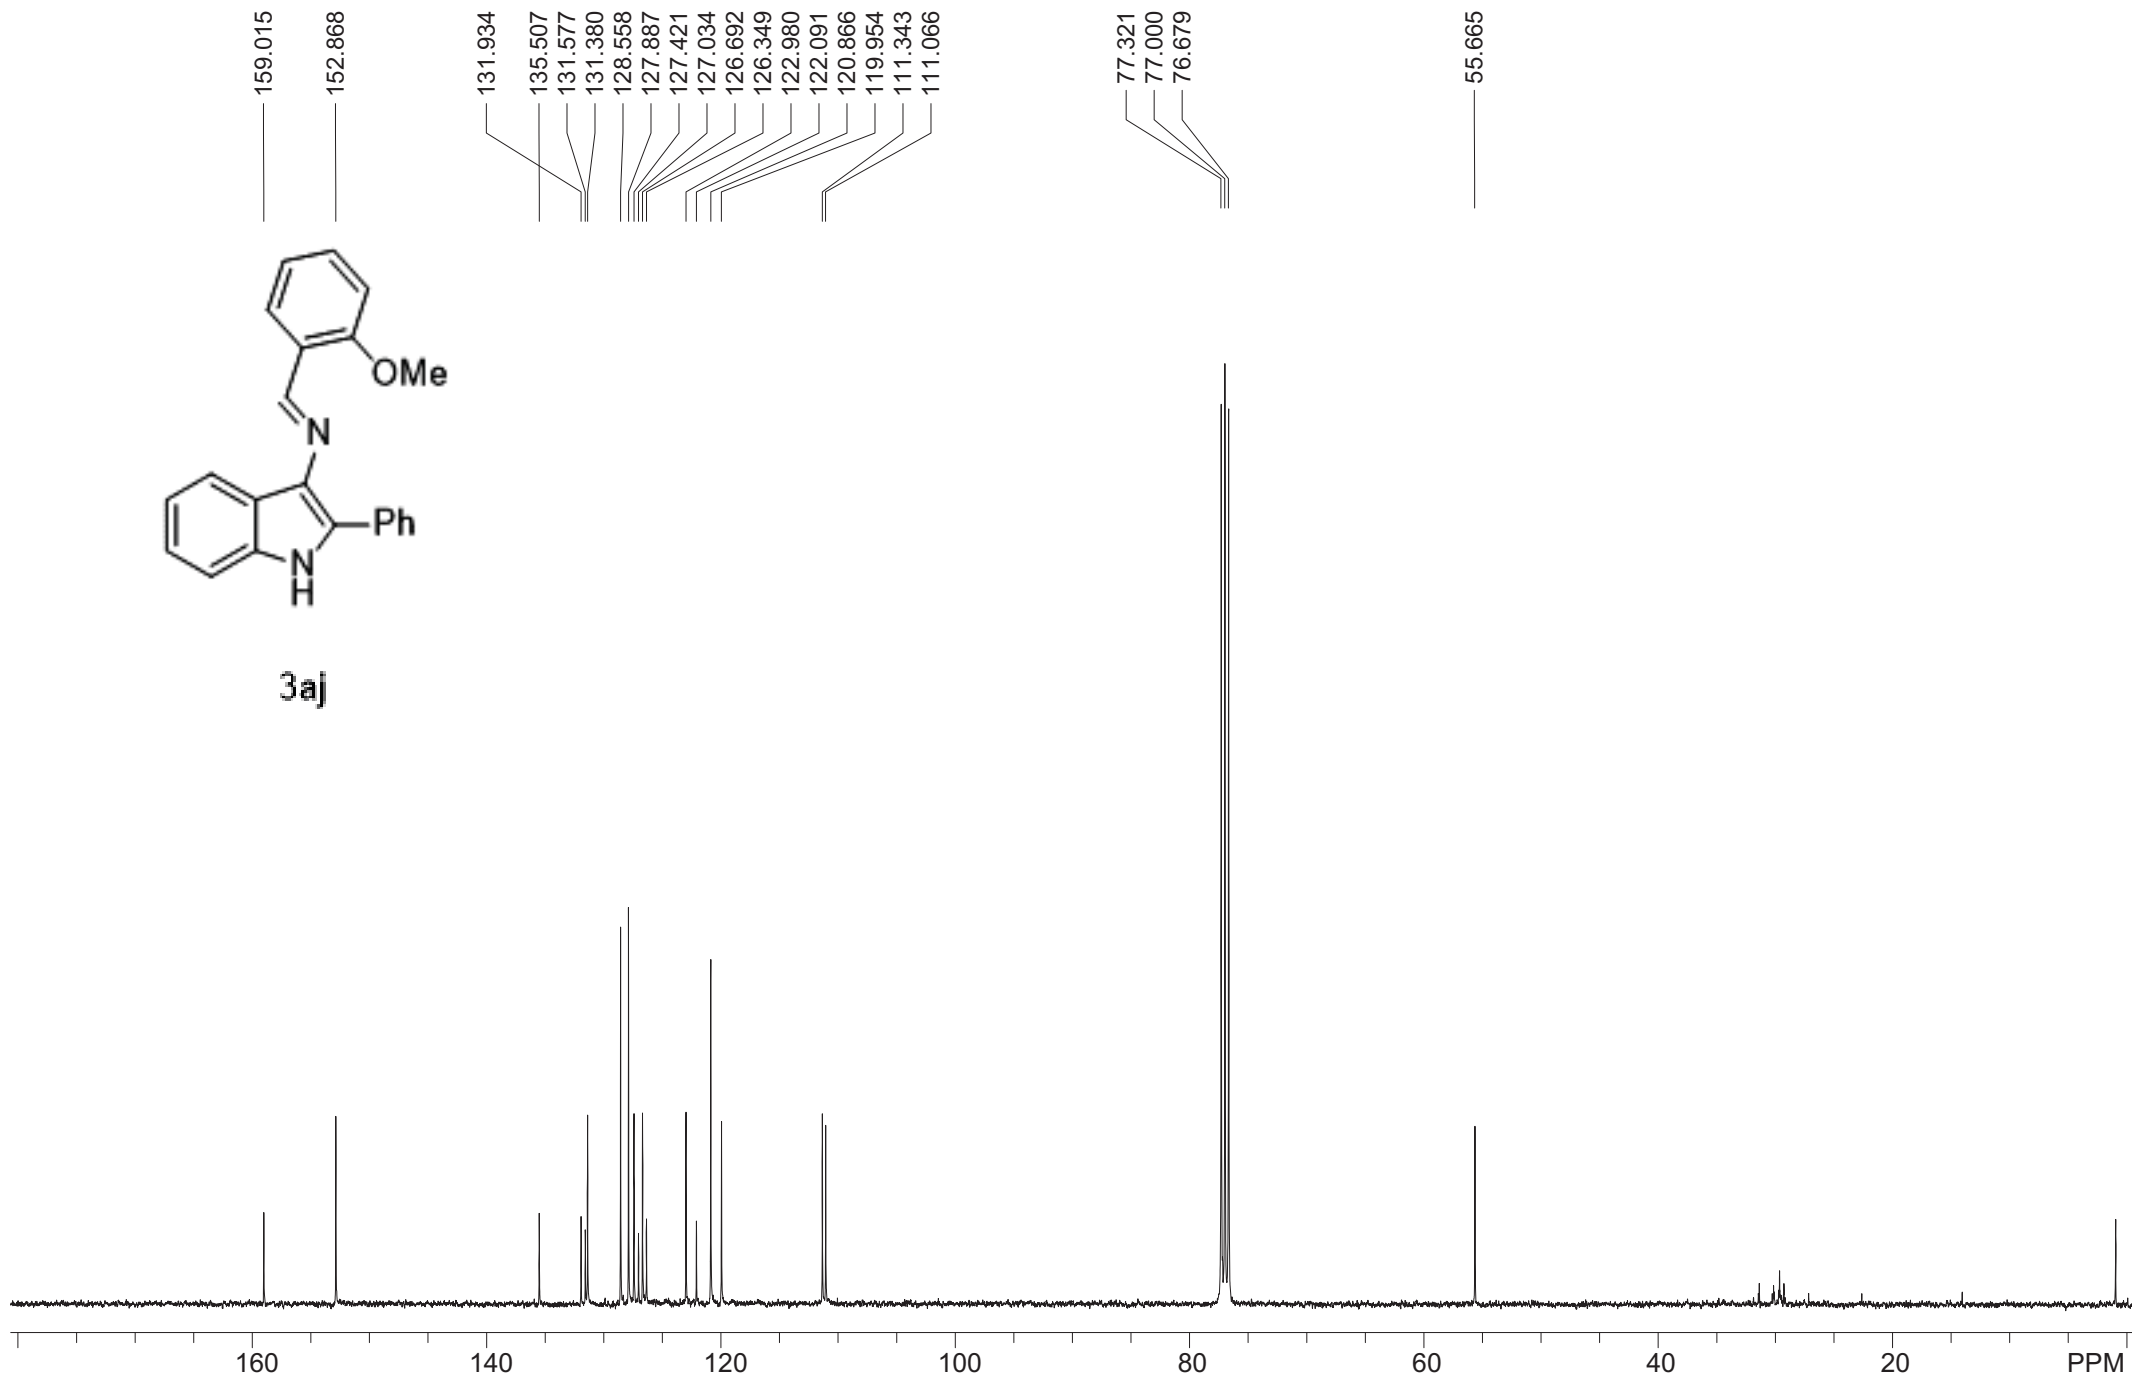

9.391  
 8.241  
 8.225  
 8.204  
 8.186  
 7.961  
 7.944  
 7.892  
 7.873  
 7.462  
 7.443  
 7.424  
 7.381  
 7.364  
 7.347  
 7.330  
 7.314  
 7.240  
 7.215  
 7.211  
 7.198  
 7.179  
 7.131  
 7.106  
 7.084

0.000

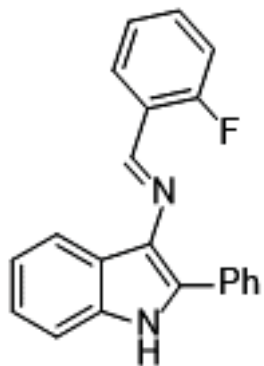

**3ak**

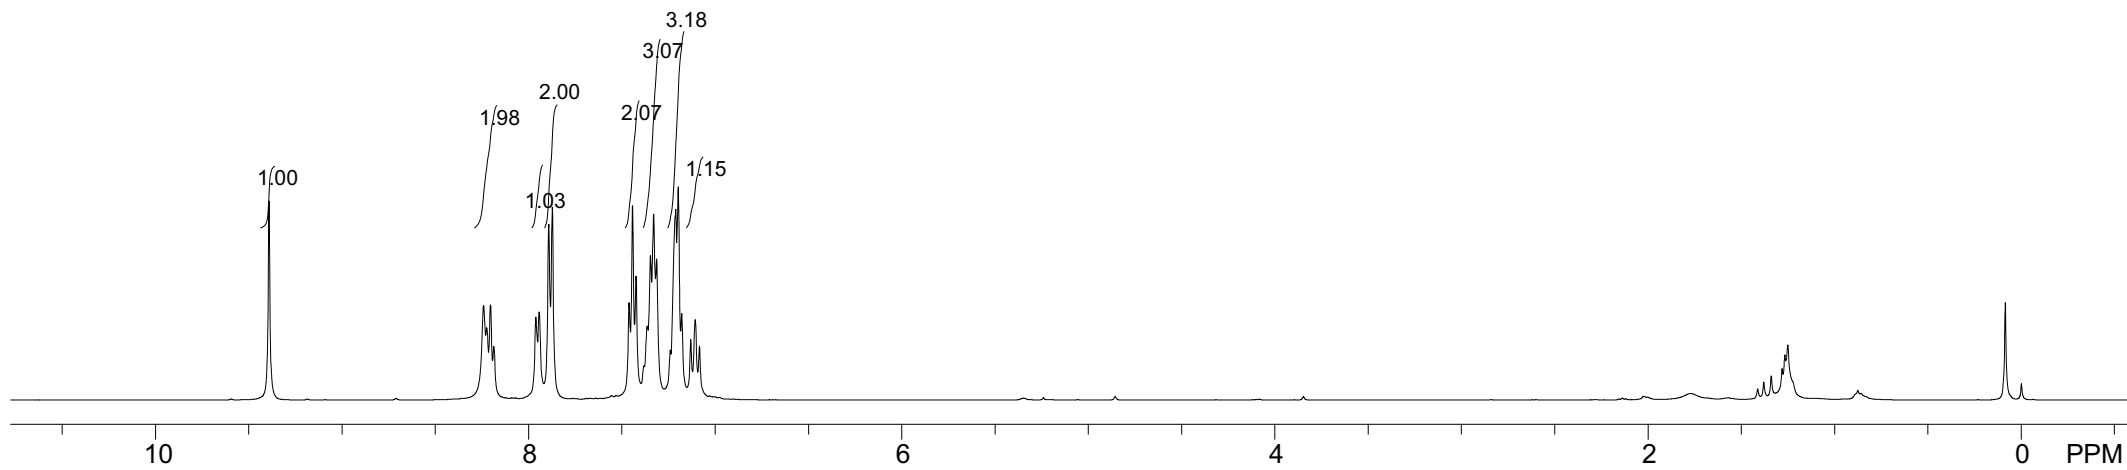

163.623  
161.115  
148.785  
148.741  
135.471  
132.999  
131.635  
131.424  
131.344  
128.558  
128.128  
127.727  
126.998  
126.976  
126.006  
125.627  
125.540  
124.358  
124.322  
123.170  
121.741  
121.245  
119.918  
115.791  
115.579  
111.489  
77.314  
77.000  
76.679

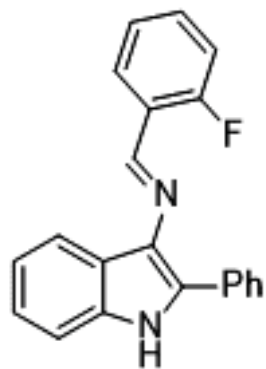

3ak

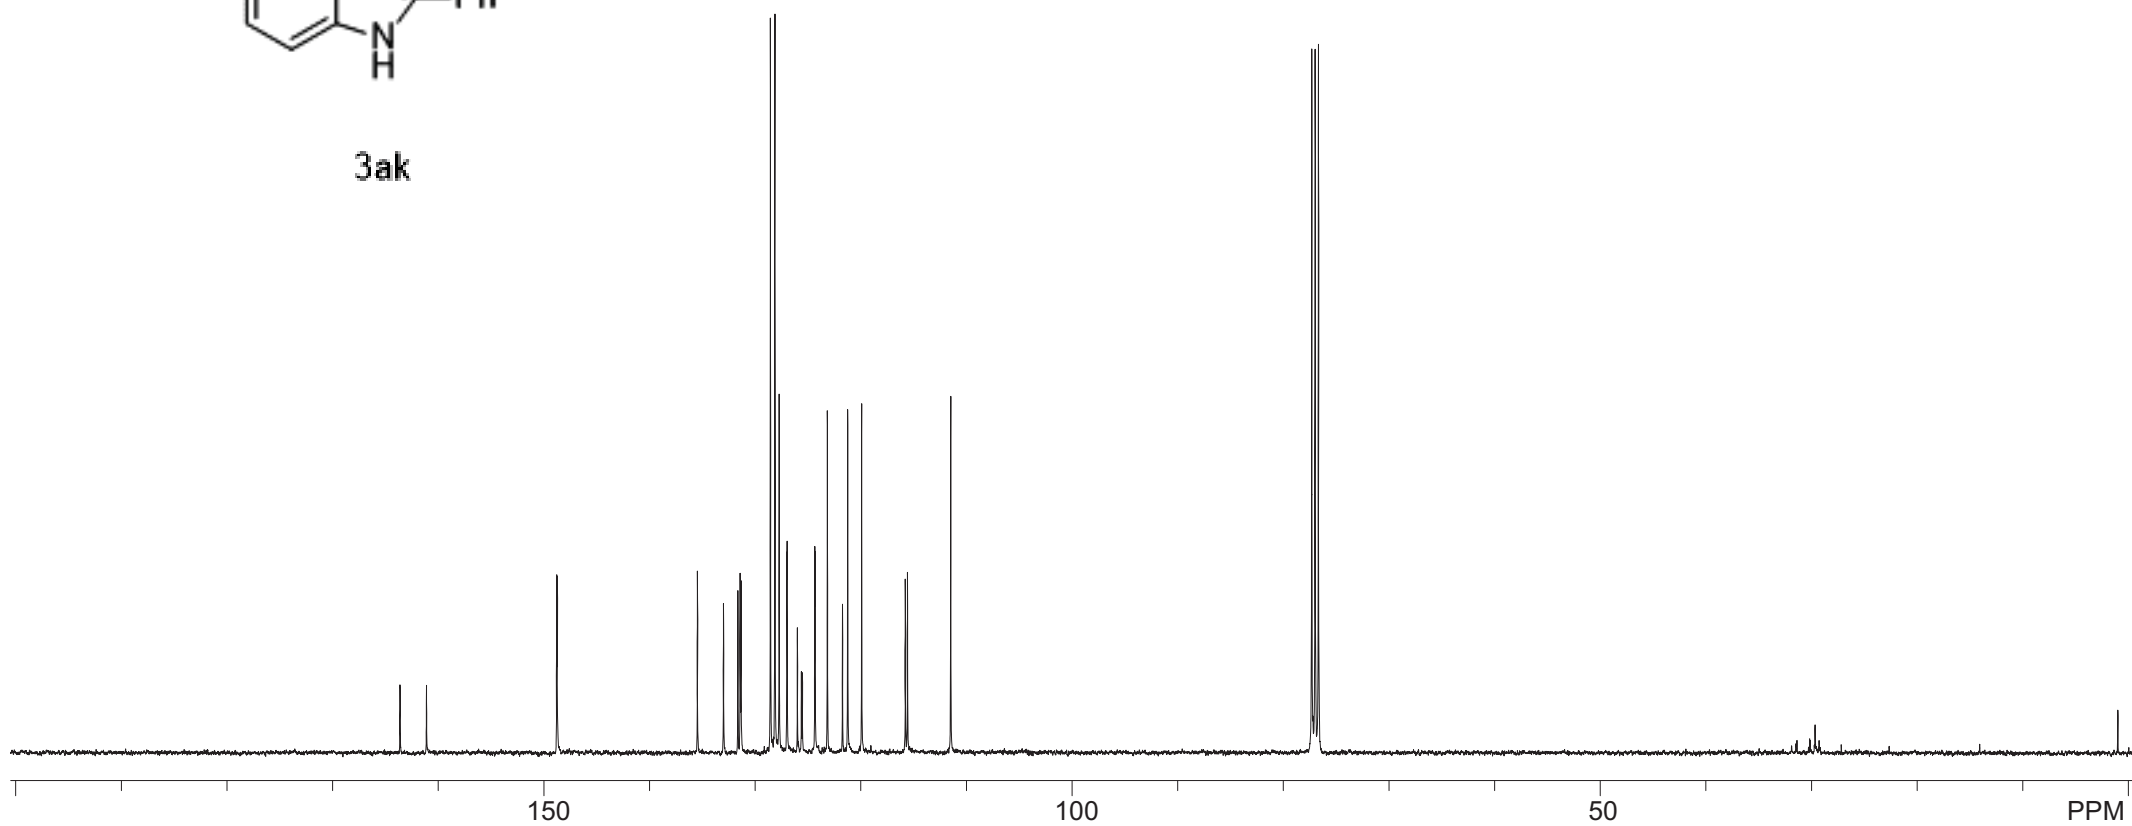



9.047  
8.236  
7.917  
7.898  
7.726  
7.674  
7.655  
7.466  
7.447  
7.429  
7.379  
7.359  
7.337  
7.319  
7.300  
7.242  
7.224  
7.207  
7.190  
7.171  
7.154

2.332  
2.322

0.000

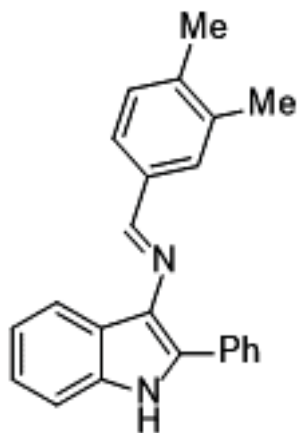

3al

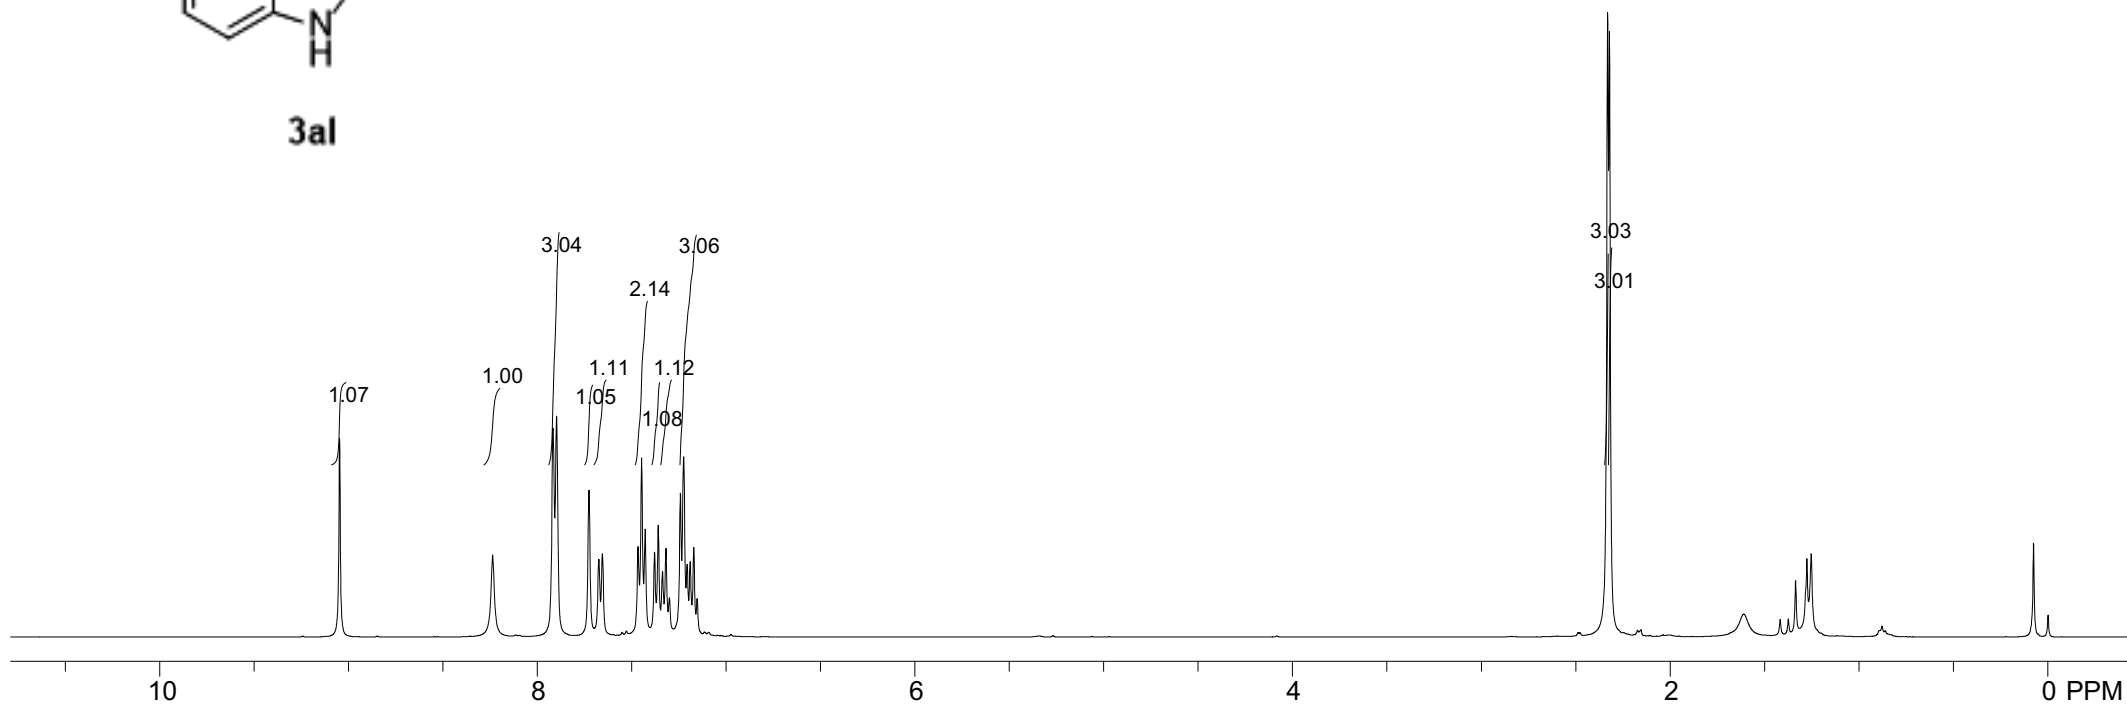

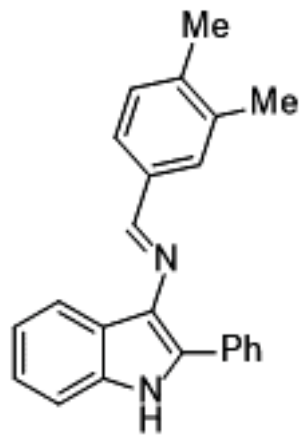

**3al**

157.403  
 139.372  
 136.929  
 135.522  
 135.471  
 131.869  
 131.074  
 130.002  
 129.091  
 128.580  
 127.822  
 127.421  
 126.349  
 125.722  
 122.973  
 122.200  
 120.756  
 119.736  
 111.423

77.321  
 77.000  
 76.687

19.878  
 19.762

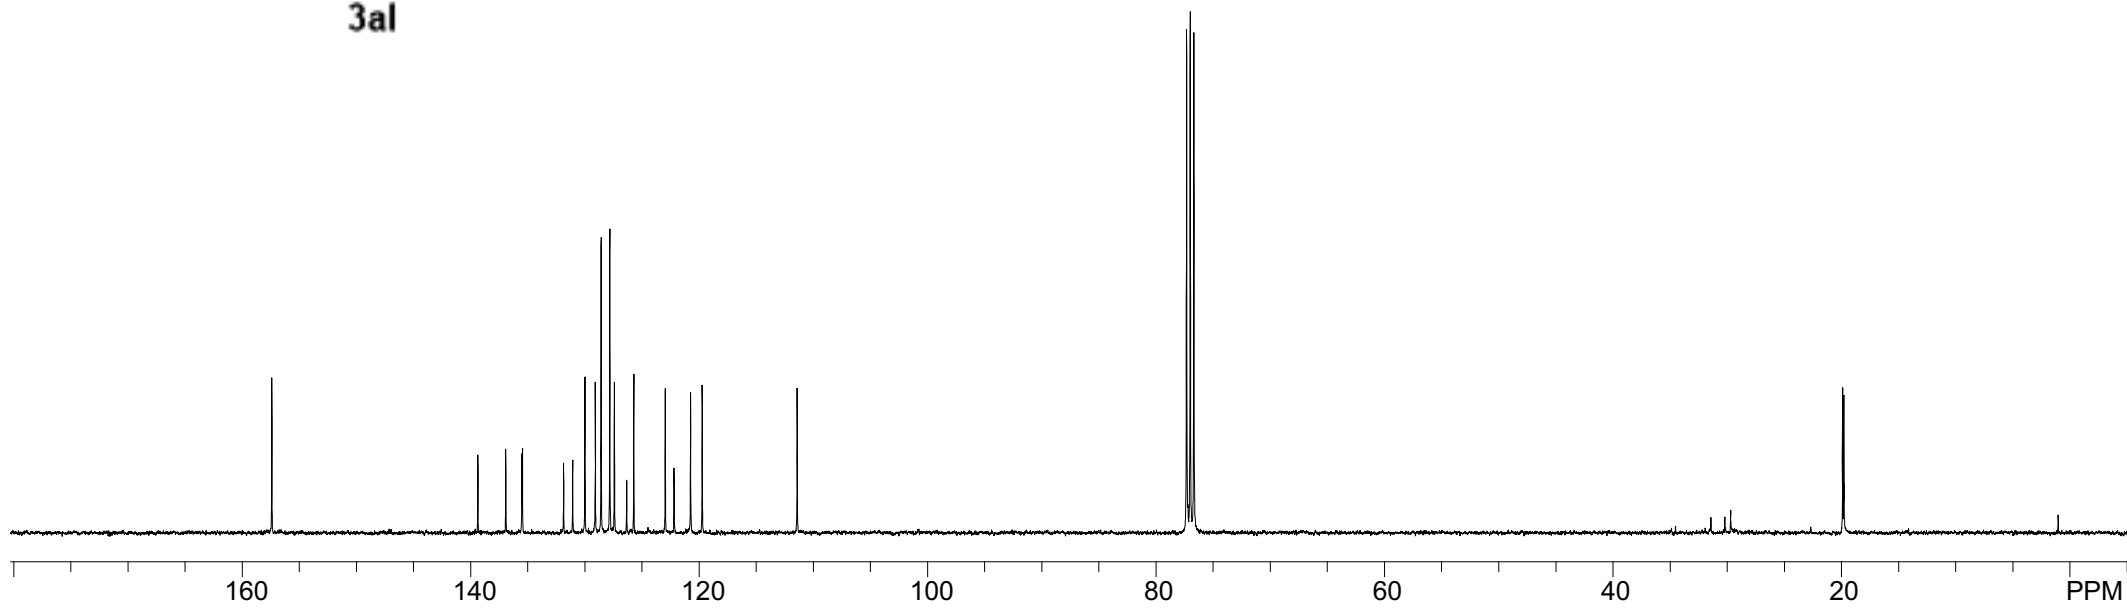

8.897  
7.873  
7.847  
7.818  
8.188  
7.799  
7.625  
7.606  
7.445  
7.428  
7.412  
7.347  
7.329  
7.311  
7.293  
7.274  
7.223  
7.205  
7.183  
7.161  
7.144

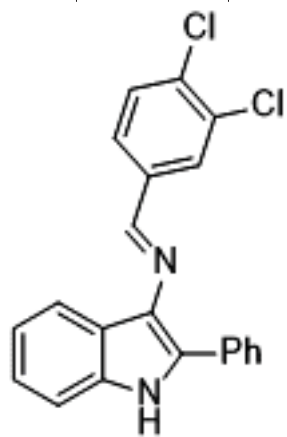

3am

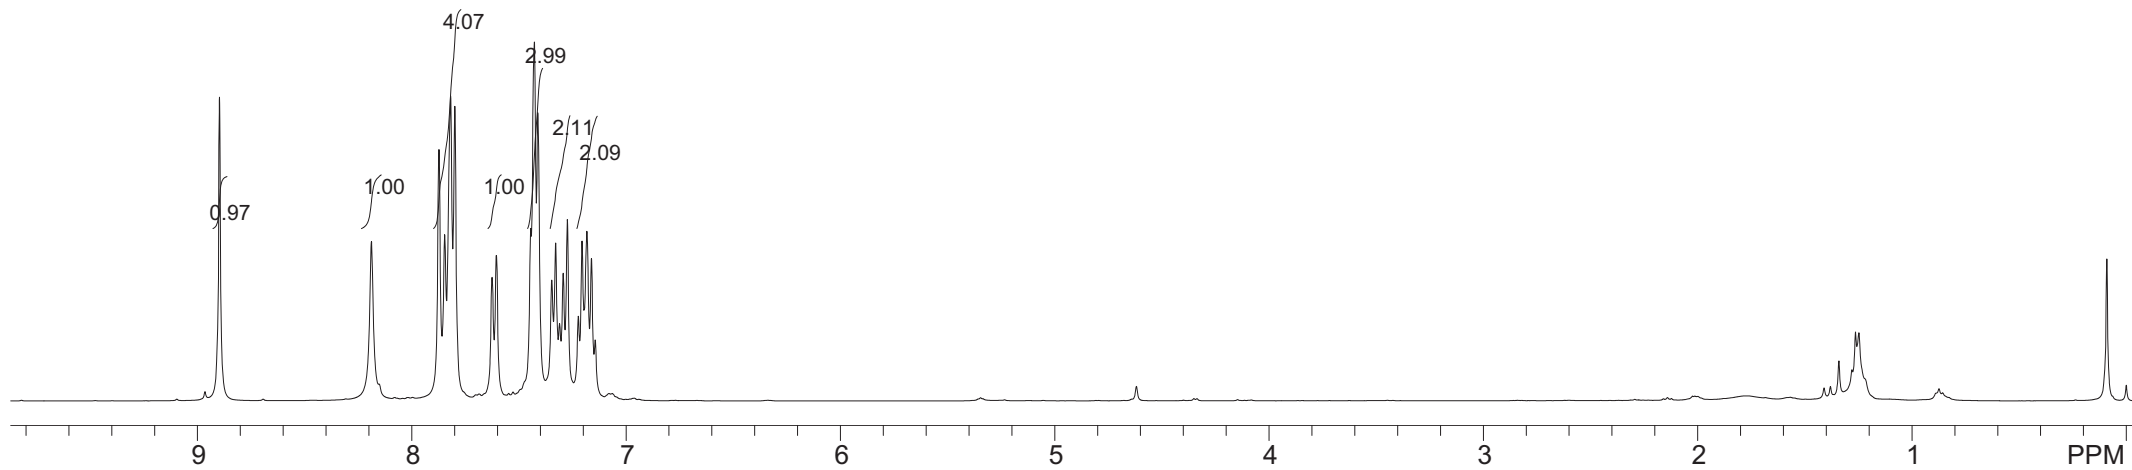

152.380  
137.899  
135.412  
133.553  
133.400  
132.897  
131.395  
130.534  
129.222  
128.580  
128.135  
127.895  
126.590  
125.015  
123.199  
121.682  
121.223  
119.816  
111.613

77.321  
77.000  
76.687

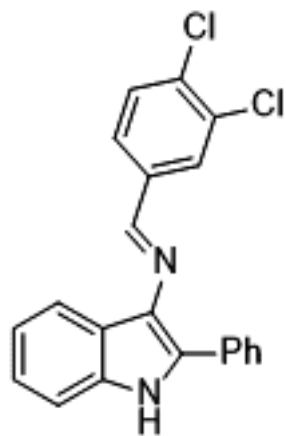

3am

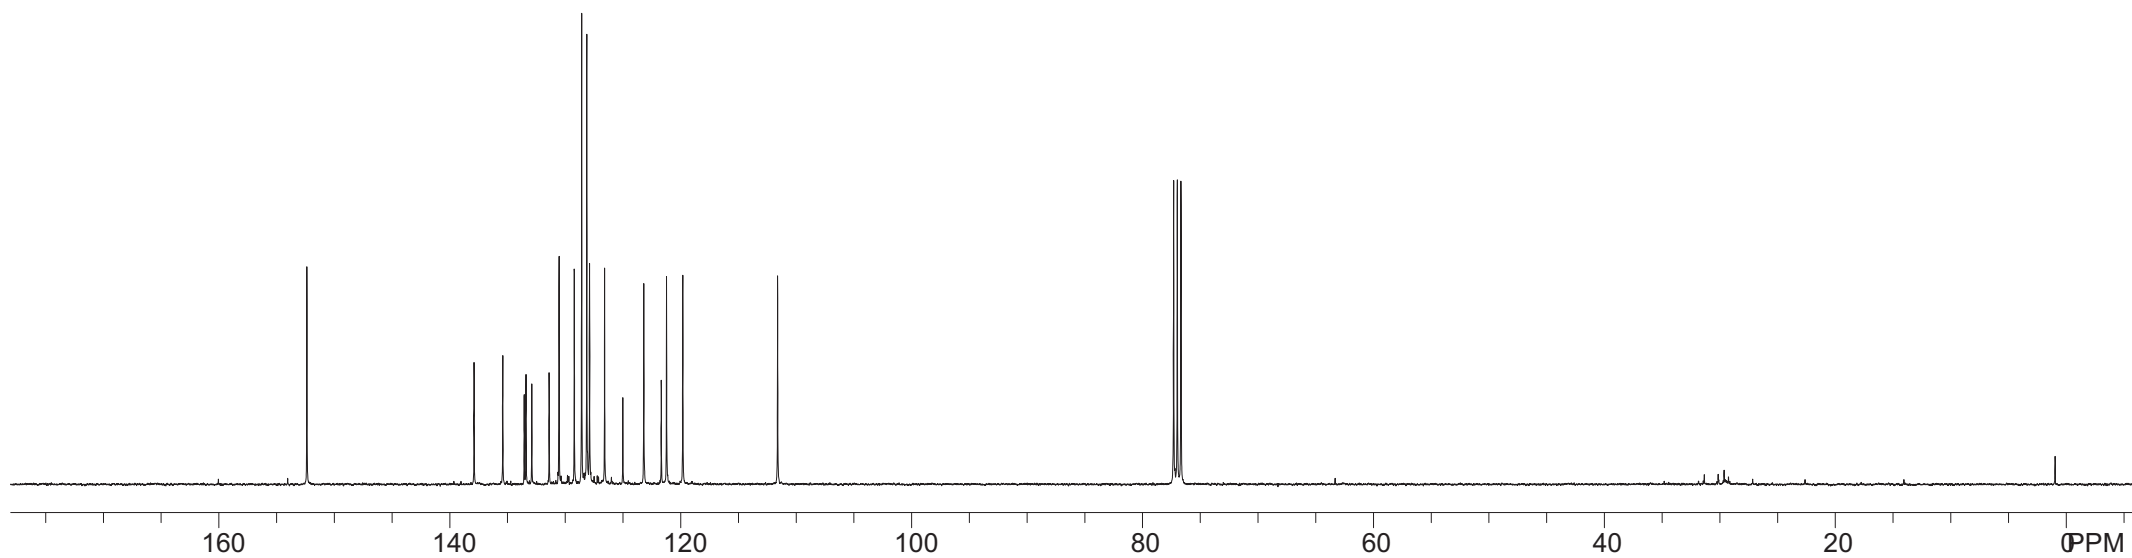

9.338  
8.378  
8.046  
8.038  
8.025  
7.920  
7.902  
7.375  
7.356  
7.335  
7.314  
7.297  
7.284  
7.275  
7.267  
7.249  
7.213  
7.205  
7.199  
7.191  
7.154  
7.134  
7.114

-0.000

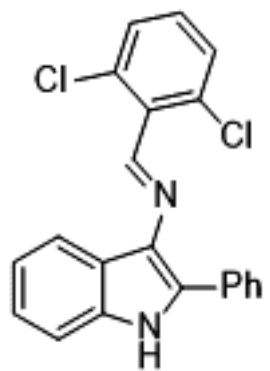

3an

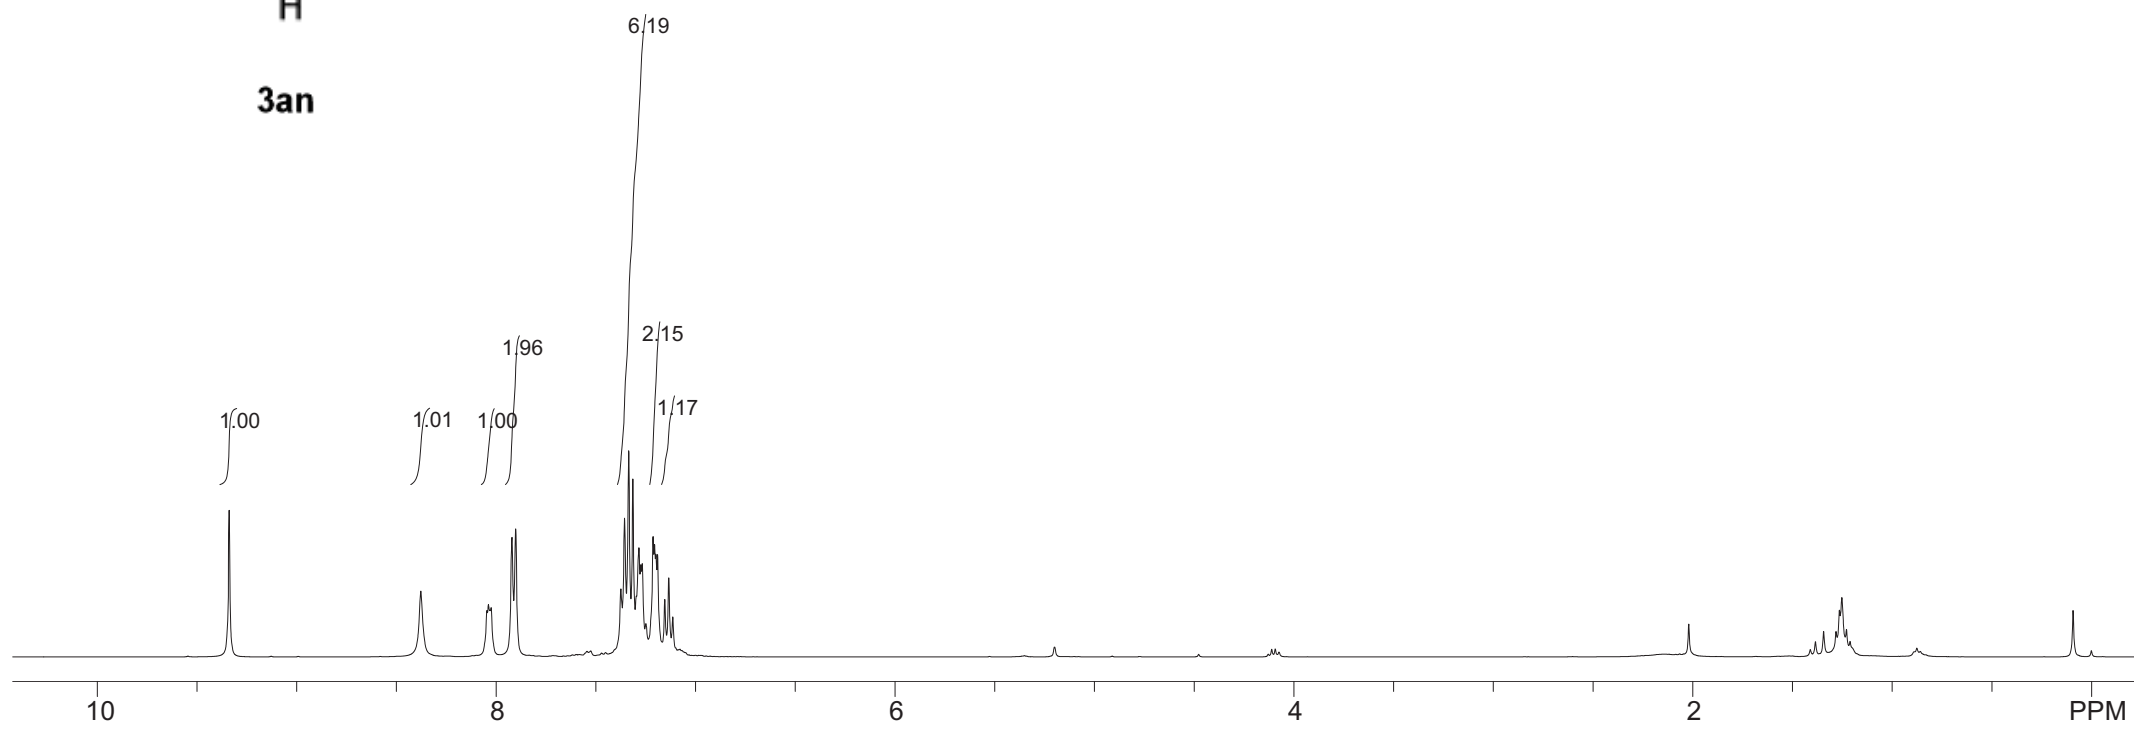

152.278

135.434  
134.763  
133.910  
133.371  
131.147  
129.725  
128.923  
128.391  
128.157  
127.924  
125.430  
123.097  
121.544  
121.405  
119.801  
111.547

77.321  
77.000  
76.687

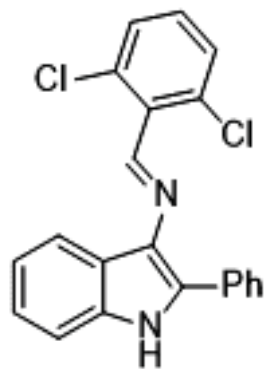

**3an**

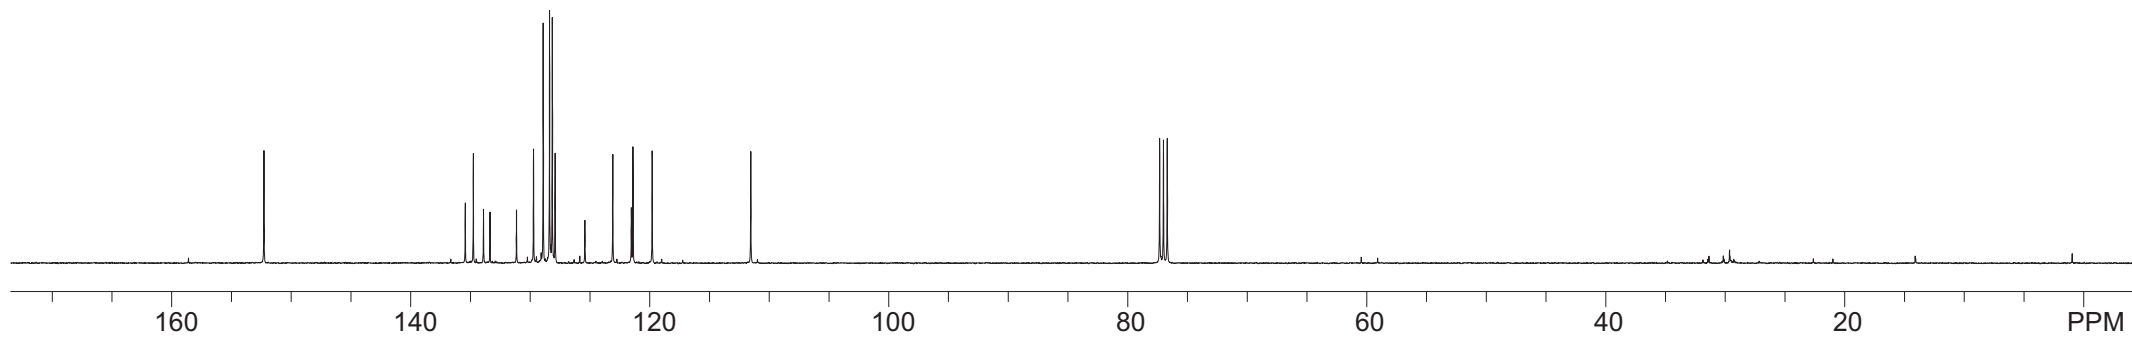

9.407  
8.339  
8.024  
8.006  
7.476  
7.457  
7.438  
7.392  
7.375  
7.355  
7.337  
7.319  
7.255  
7.245  
7.215  
7.116  
7.103  
7.091  
7.083  
7.075  
7.068

0.000

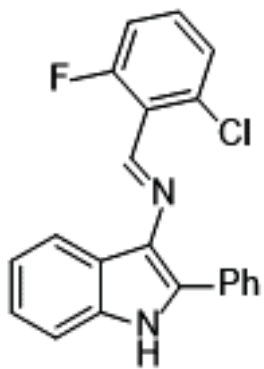

3ao

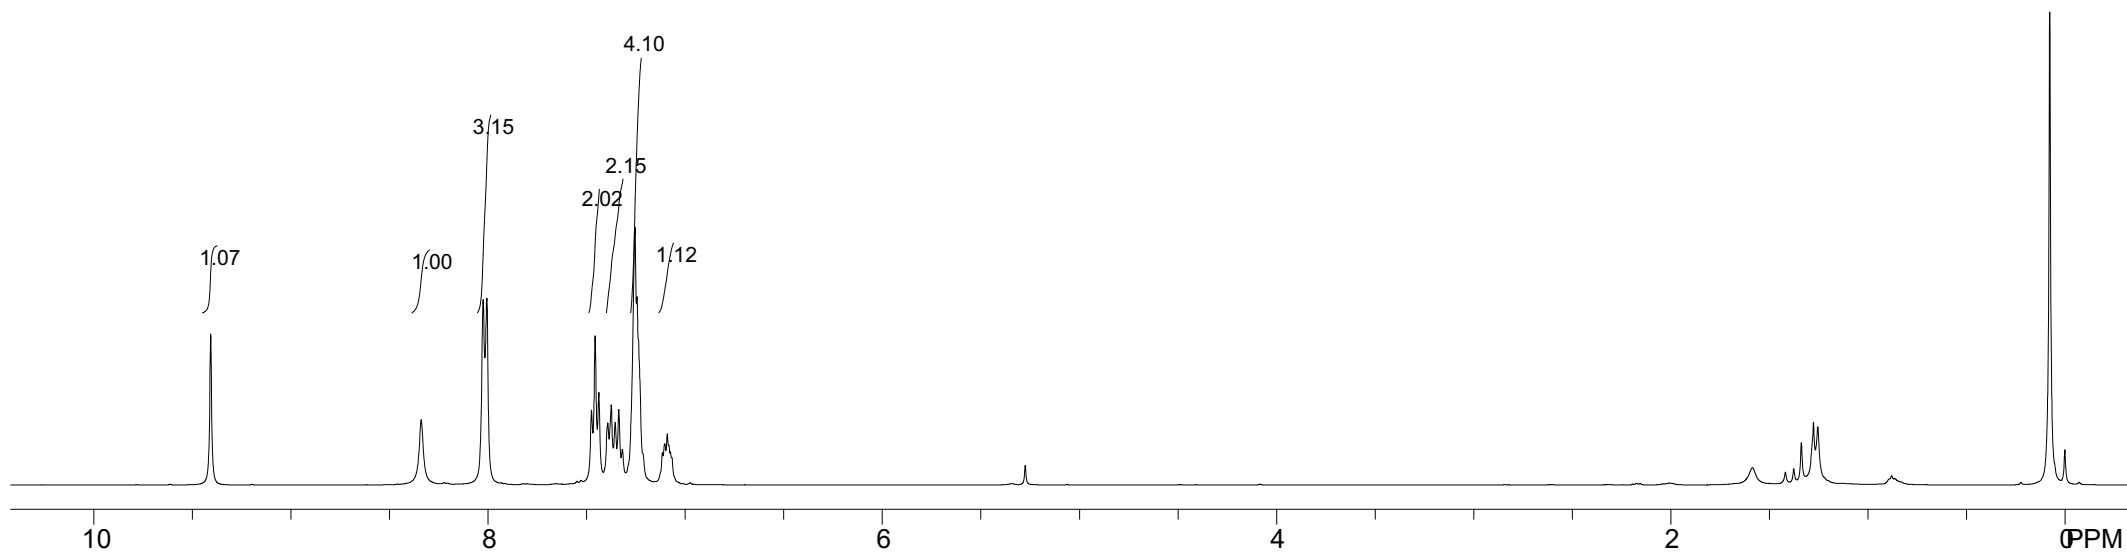

162.661  
160.079  
149.937  
149.908  
135.544  
135.412  
135.369  
133.633  
131.300  
130.367  
130.272  
128.573  
127.975  
126.123  
125.817  
125.780  
124.110  
123.994  
123.243  
121.529  
121.456  
119.918  
115.448  
115.222  
111.533

77.321  
77.000  
76.687

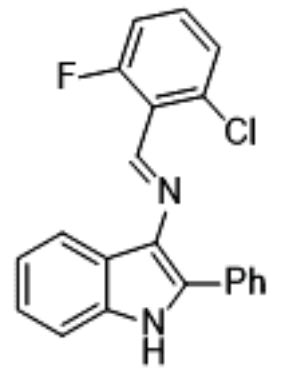

3ao

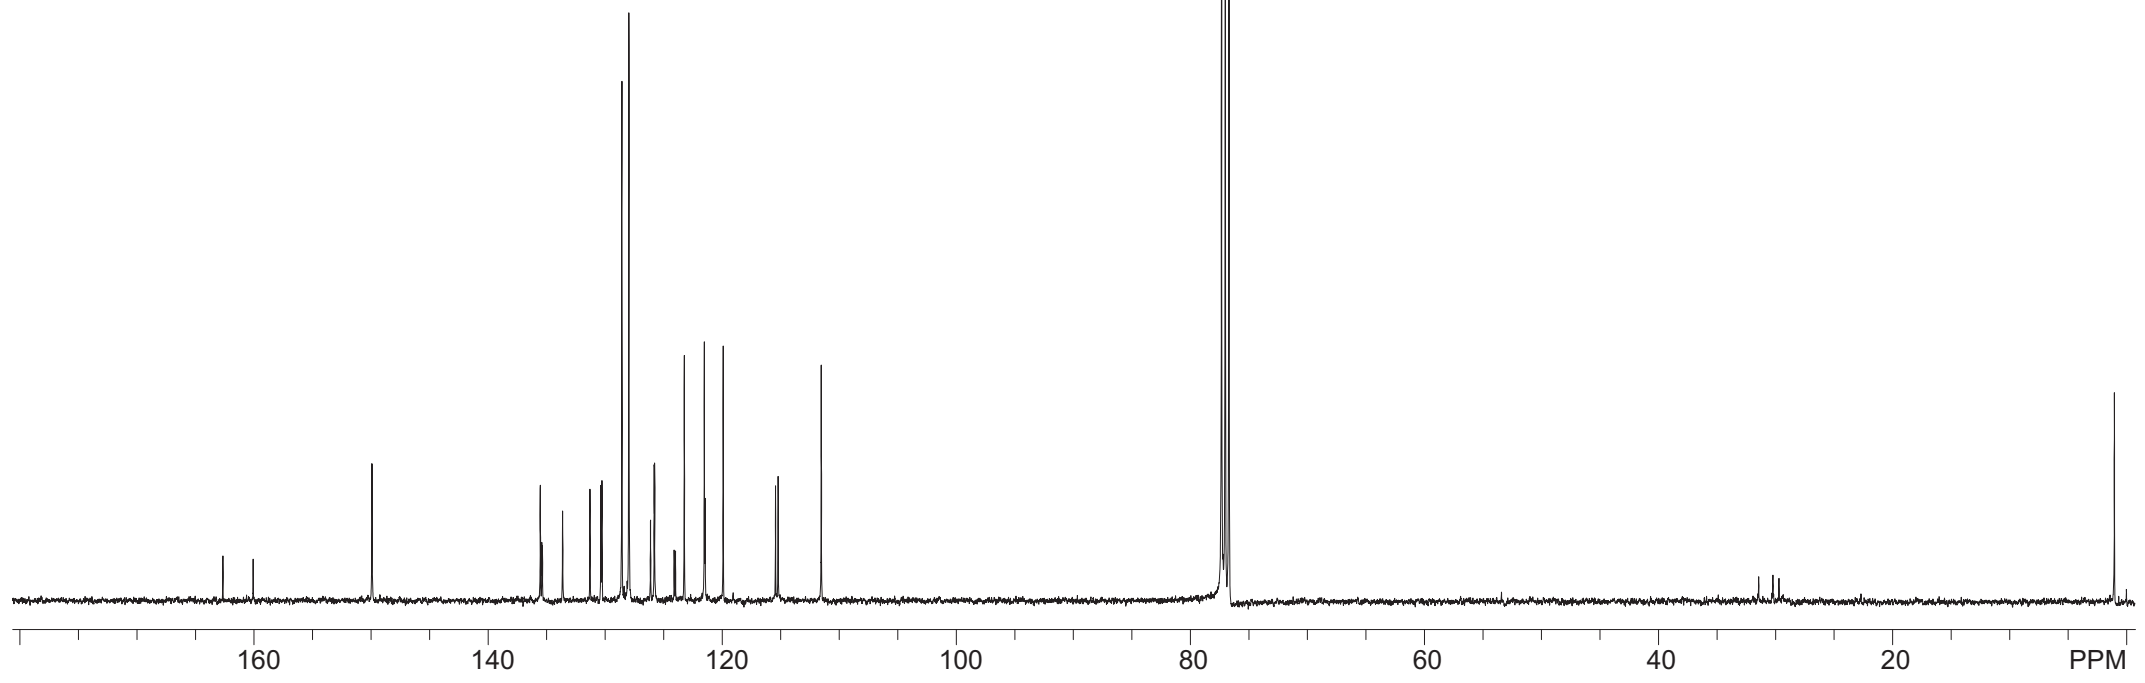



9.786  
9.087  
9.071  
8.264  
8.182  
8.168  
8.034  
8.019  
7.967  
7.952  
7.920  
7.904  
7.895  
7.593  
7.590  
7.582  
7.577  
7.566  
7.560  
7.551  
7.544  
7.543  
7.529  
7.515  
7.469  
7.454  
7.439  
7.398  
7.384  
7.353  
7.338  
7.324  
7.275  
7.272  
7.260  
7.258  
7.246  
7.242  
7.229  
7.227  
7.219  
7.216

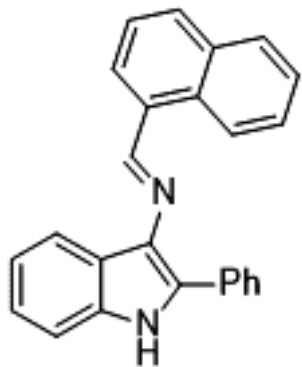

3ap

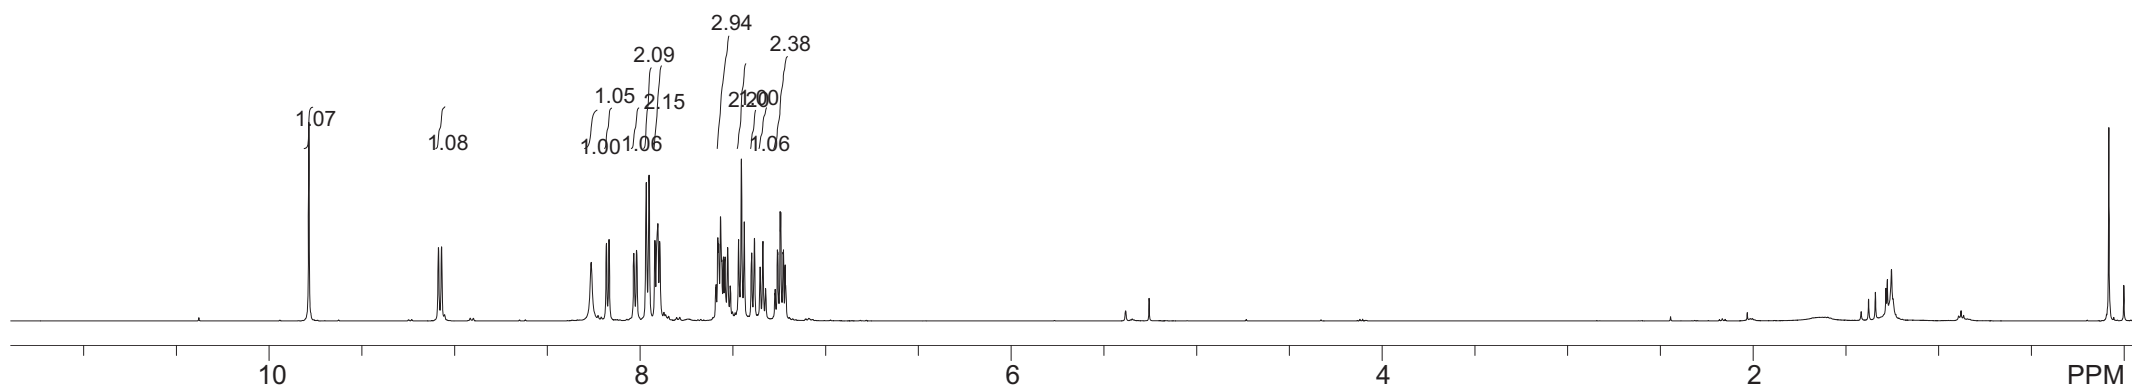

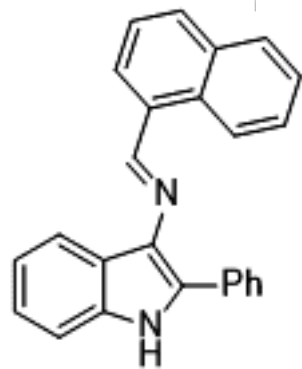

3ap

156.238

135.578

134.018

132.816

132.029

131.868

131.431

130.702

128.705

128.618

128.181

127.999

127.663

126.993

126.796

125.965

125.470

124.377

123.123

121.986

121.083

119.822

111.565

77.255

77.000

76.745

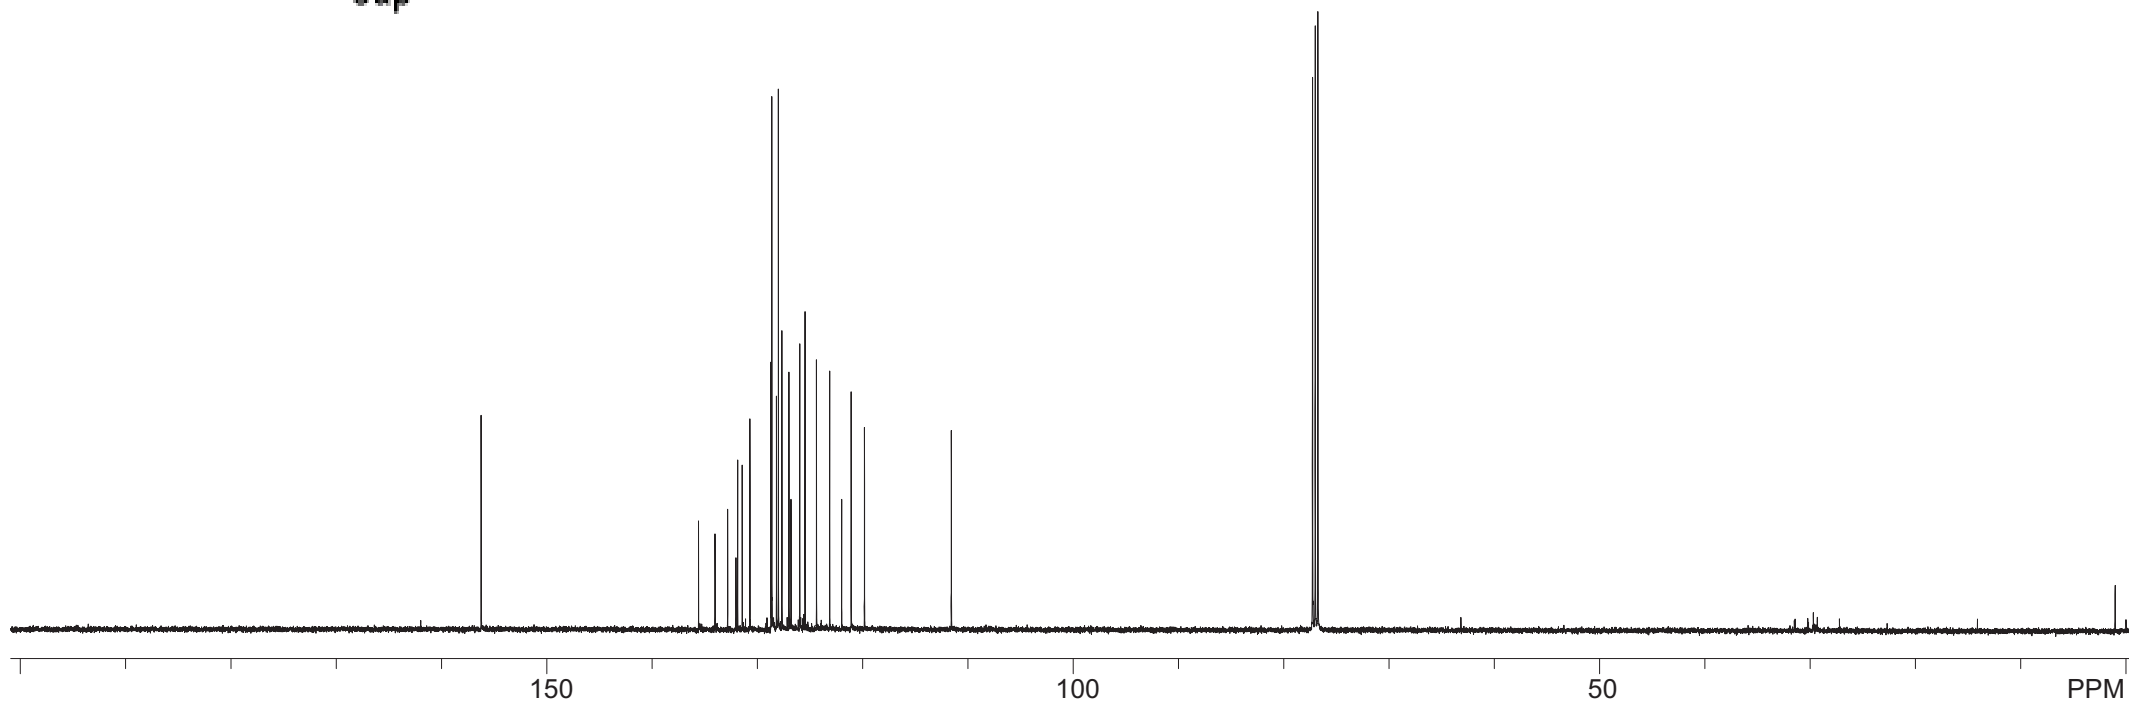

11.769

9.250  
9.139  
8.631  
8.622  
8.340  
8.321  
8.132  
8.114  
7.562  
7.544  
7.526  
7.494  
7.474  
7.408  
7.390  
7.372  
7.254  
7.236  
7.217  
7.181  
7.163  
7.145

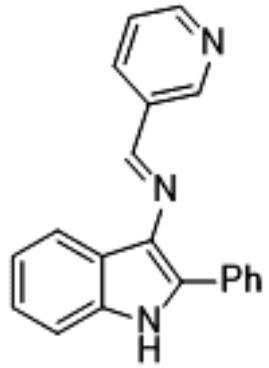

3aq

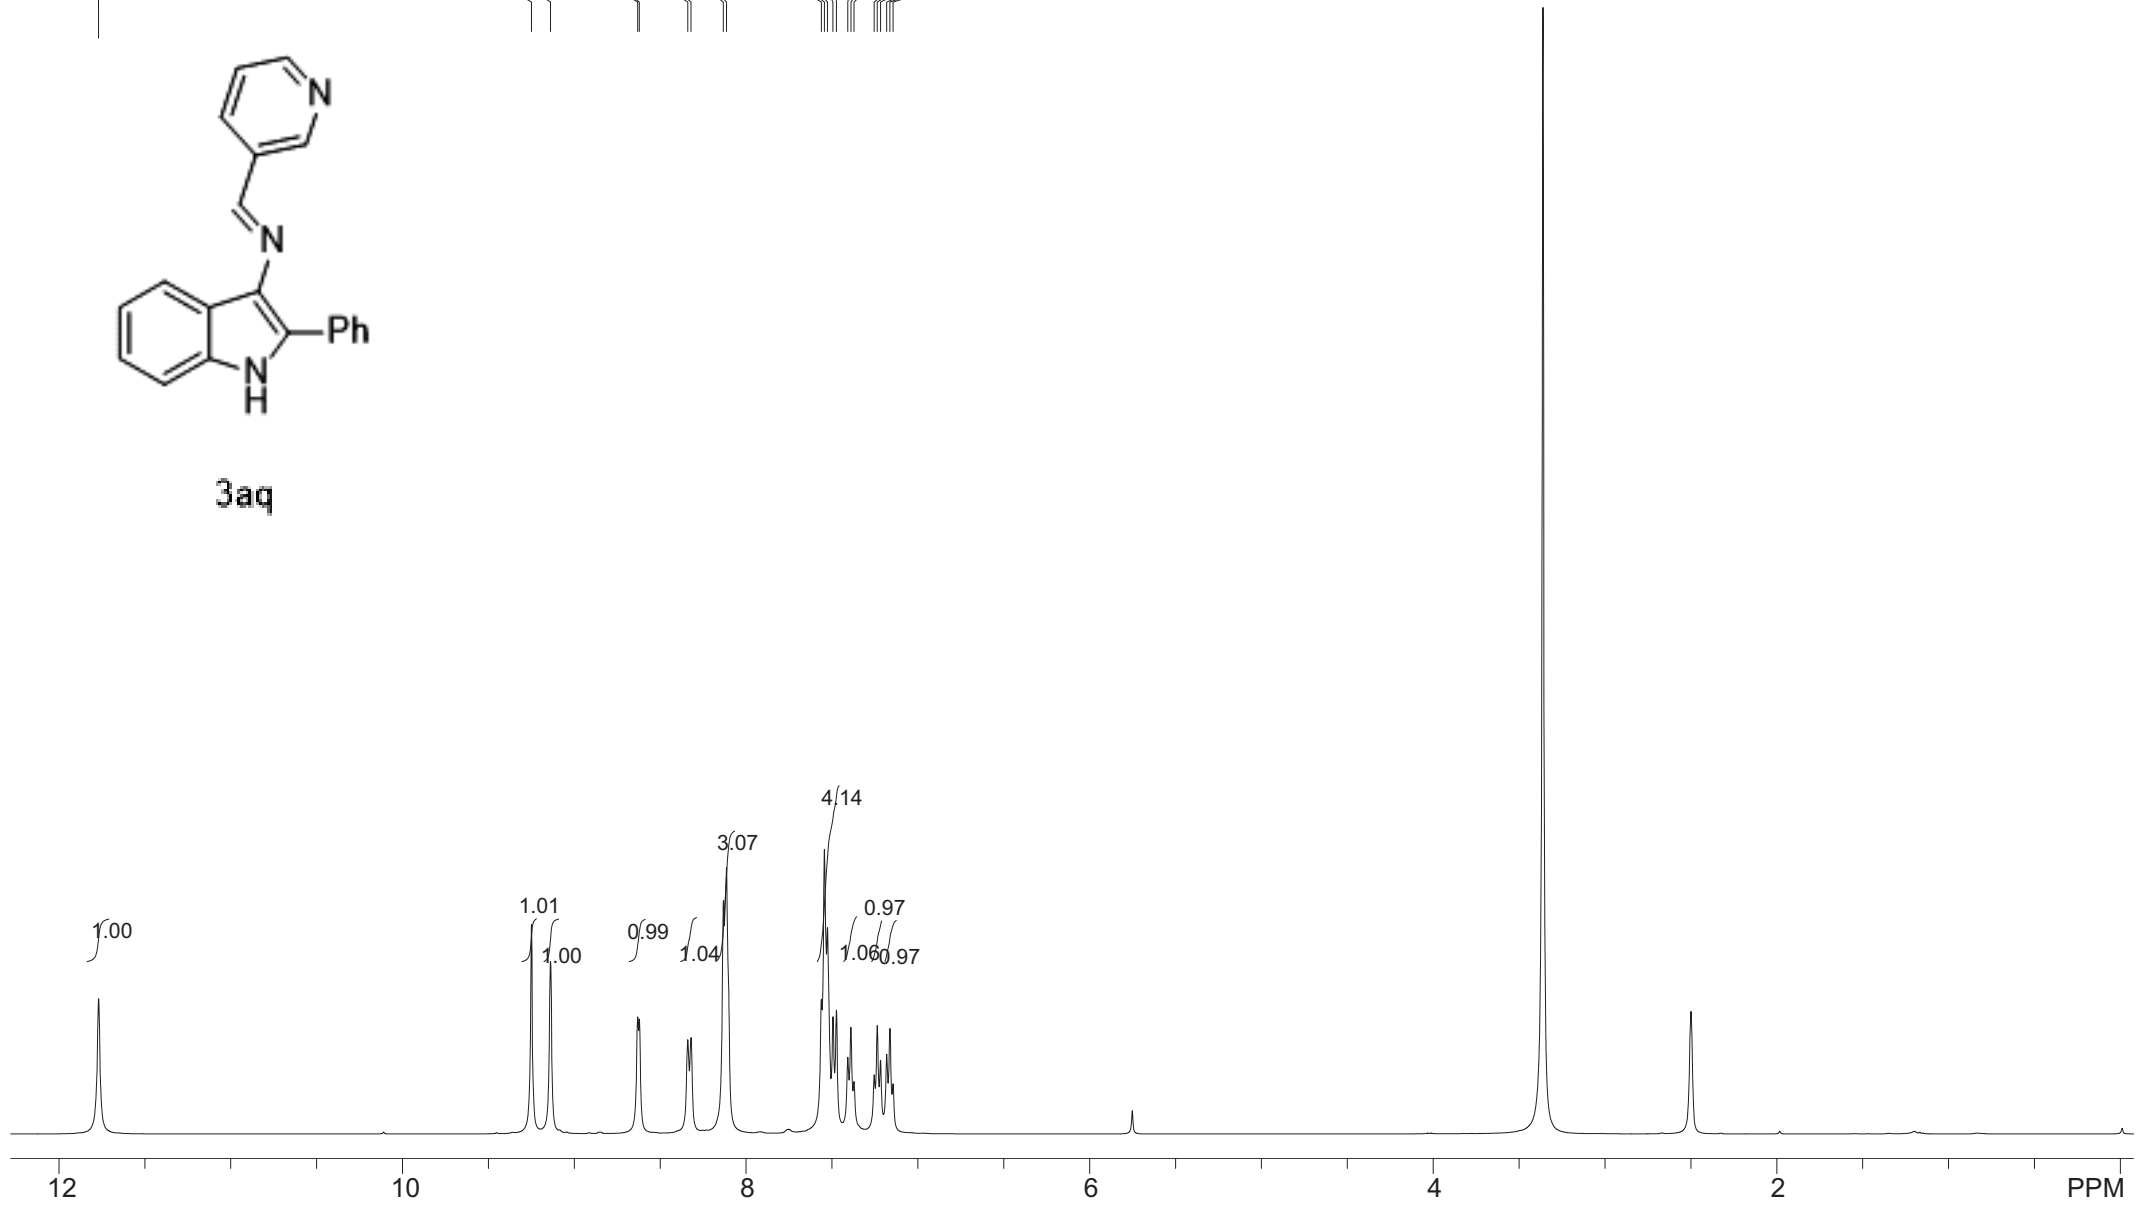

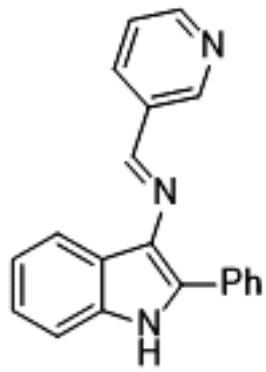

3aq

151.895  
150.860  
149.927

136.197  
134.257  
134.199  
133.966  
132.150  
128.920  
128.752  
128.110  
124.735  
124.443  
123.262  
121.235  
121.133  
120.505  
112.514

40.627  
40.423  
40.211  
40.000  
39.796  
39.584  
39.373

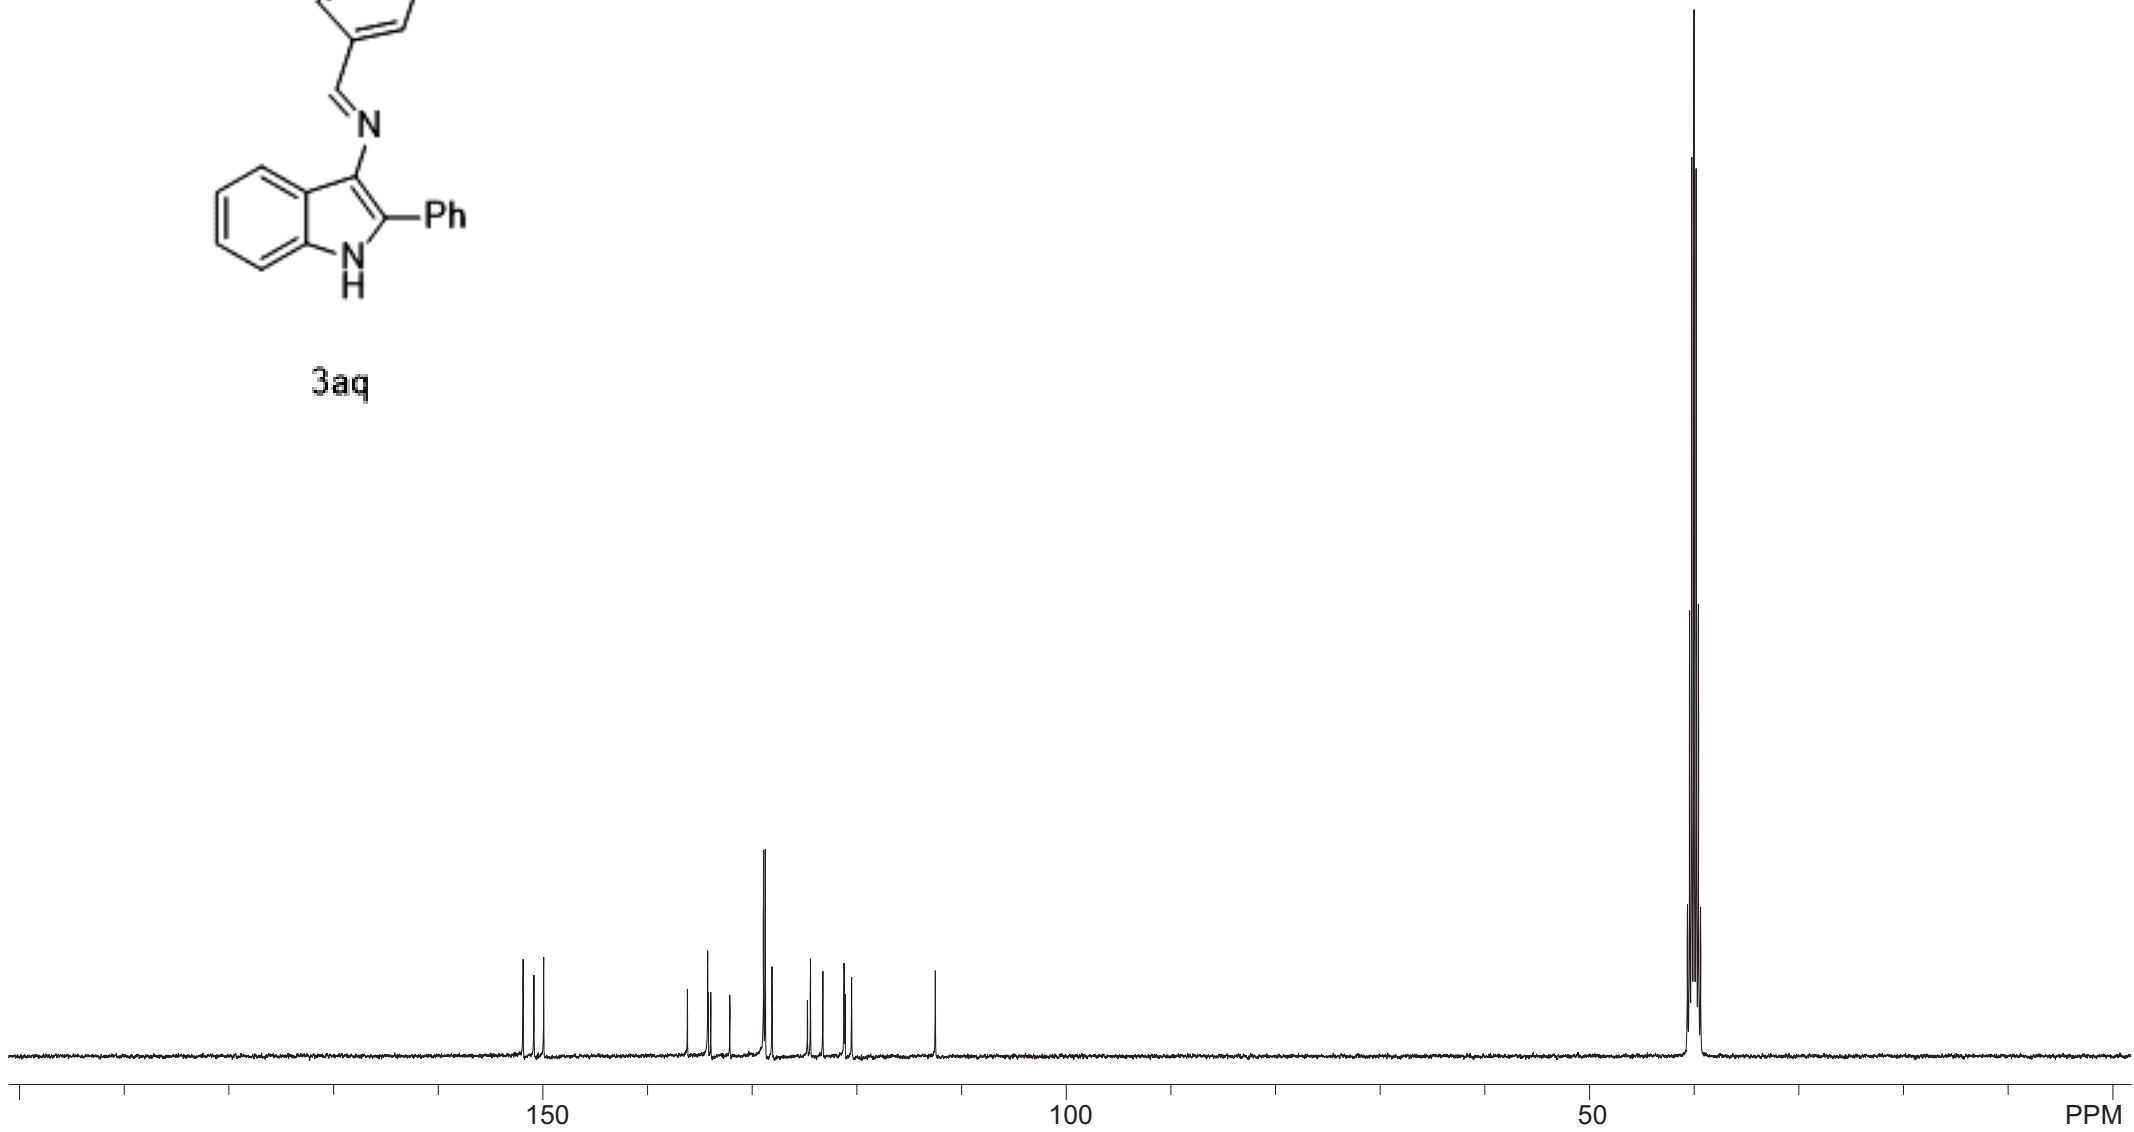

7.921  
7.864  
7.845  
7.553  
7.534  
7.505  
7.487  
7.470  
7.440  
7.421  
7.403  
7.328  
7.311  
7.292  
7.237  
7.220  
7.205  
7.189  
7.093  
7.082  
7.078  
7.067  
7.044  
7.024  
7.005  
6.992  
6.975  
6.916  
6.898  
6.880

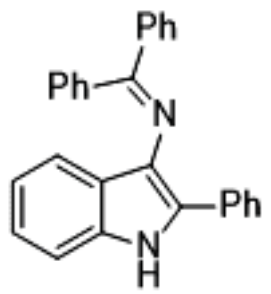

**3ar**

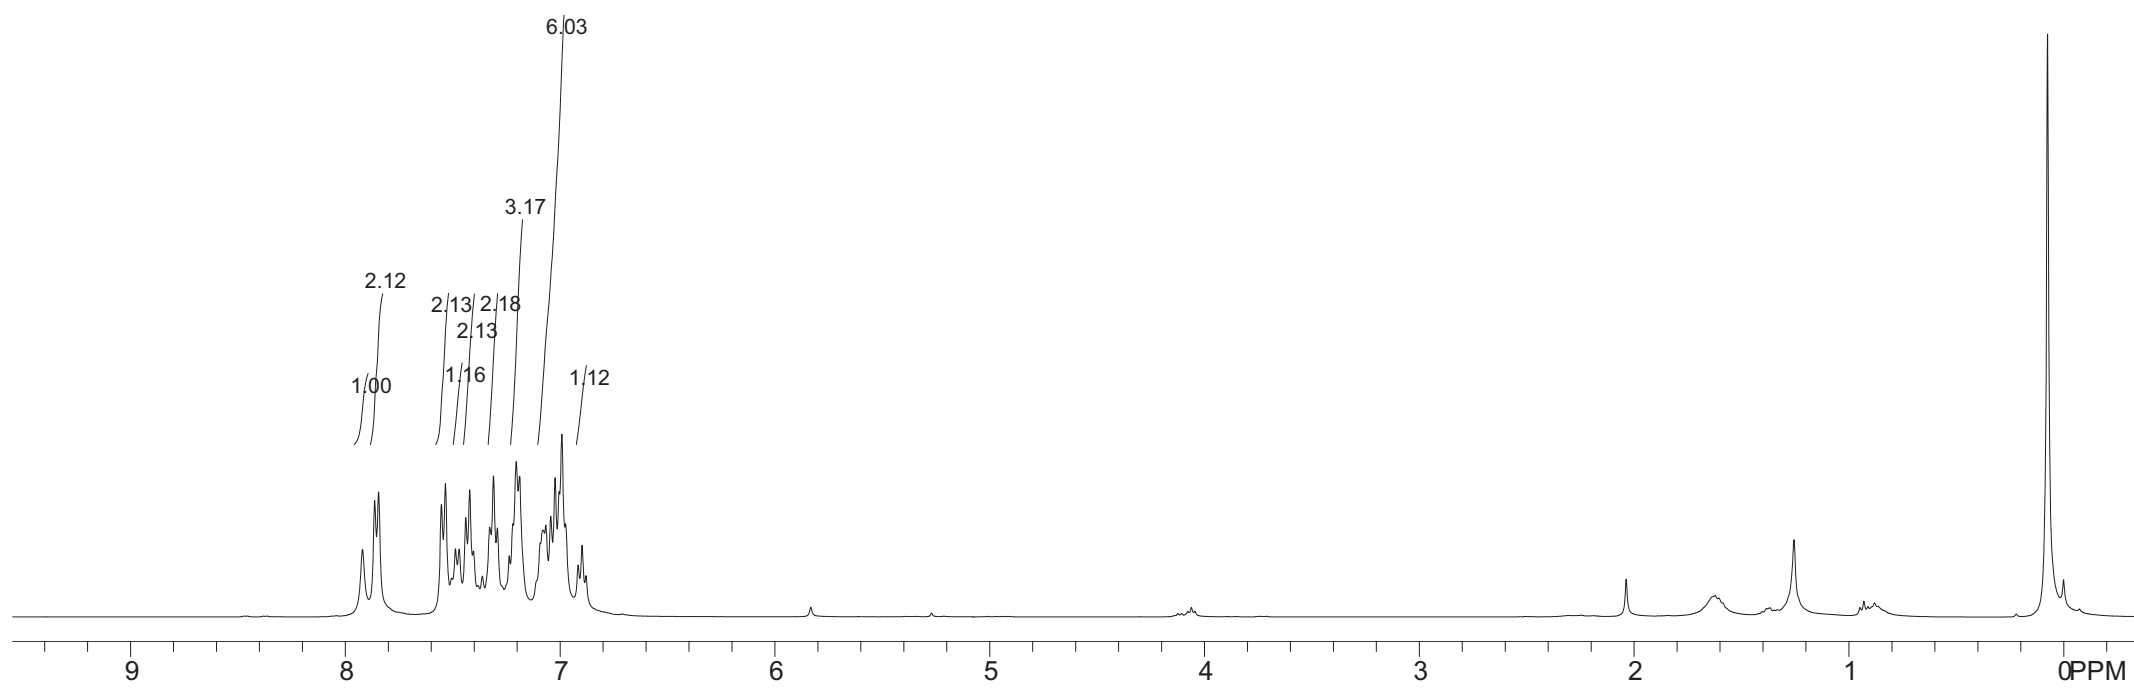

0.000

169.398

139.991  
137.206  
135.135  
132.394  
130.410  
129.470  
128.726  
128.682  
128.405  
128.092  
127.559  
127.348  
126.575  
126.189  
124.701  
122.732  
122.506  
119.488  
119.138  
110.628

77.321  
77.000  
76.687

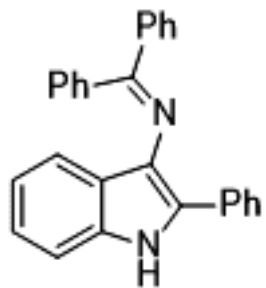

3ar

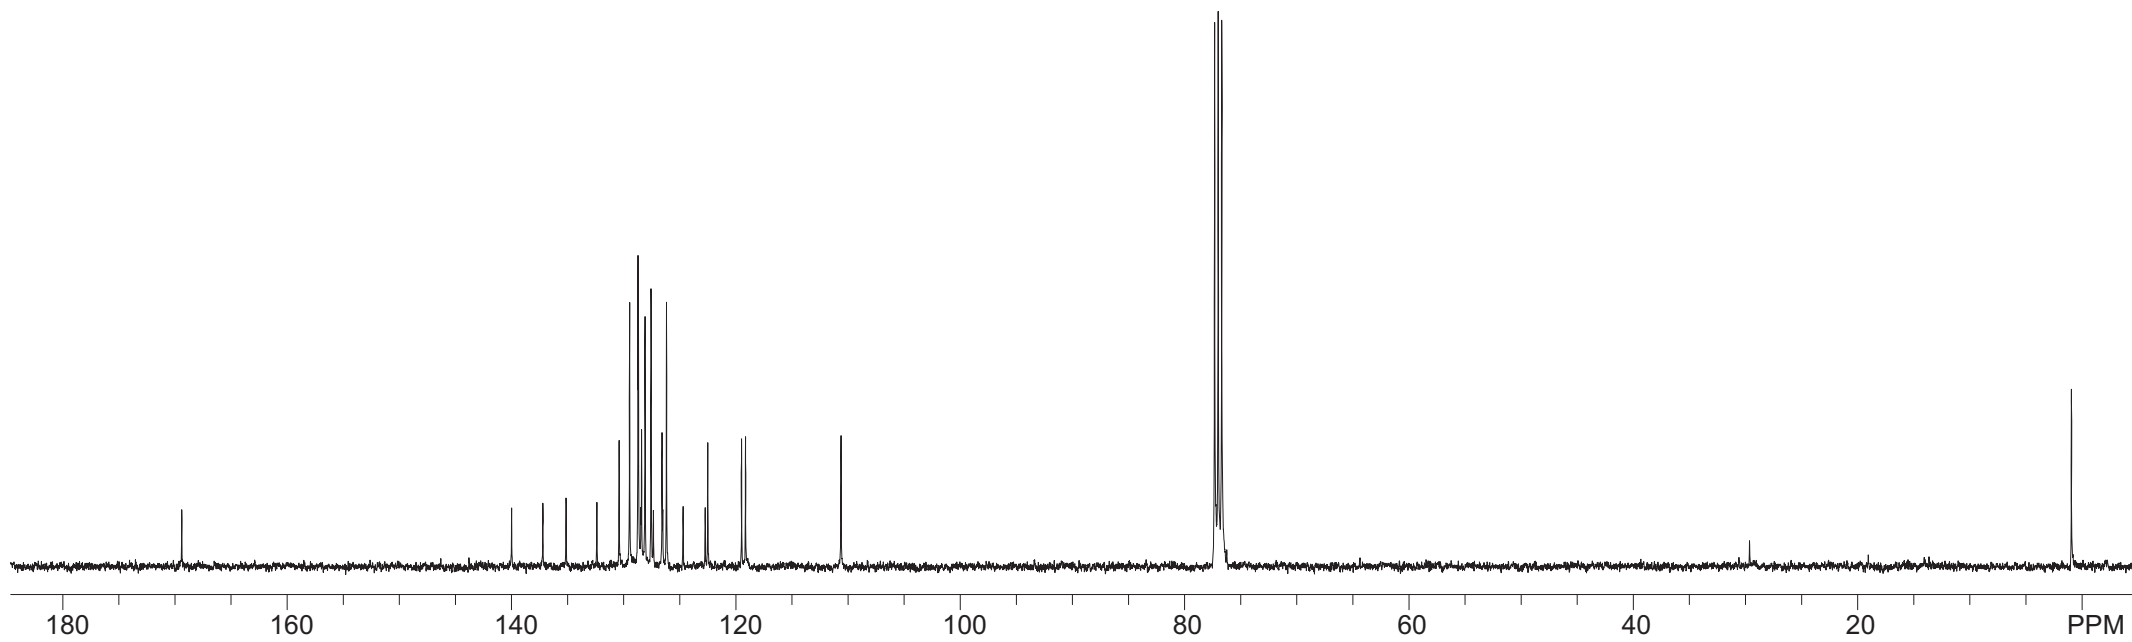

8.132  
8.077  
7.645  
7.626  
7.496  
7.369  
7.352  
7.339  
7.317  
7.245  
7.229  
7.210  
7.191  
7.103  
7.084  
7.067

2.738  
2.720  
2.701  
2.682

0.887  
0.868  
0.849

0.000

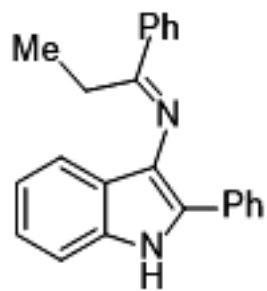

3as

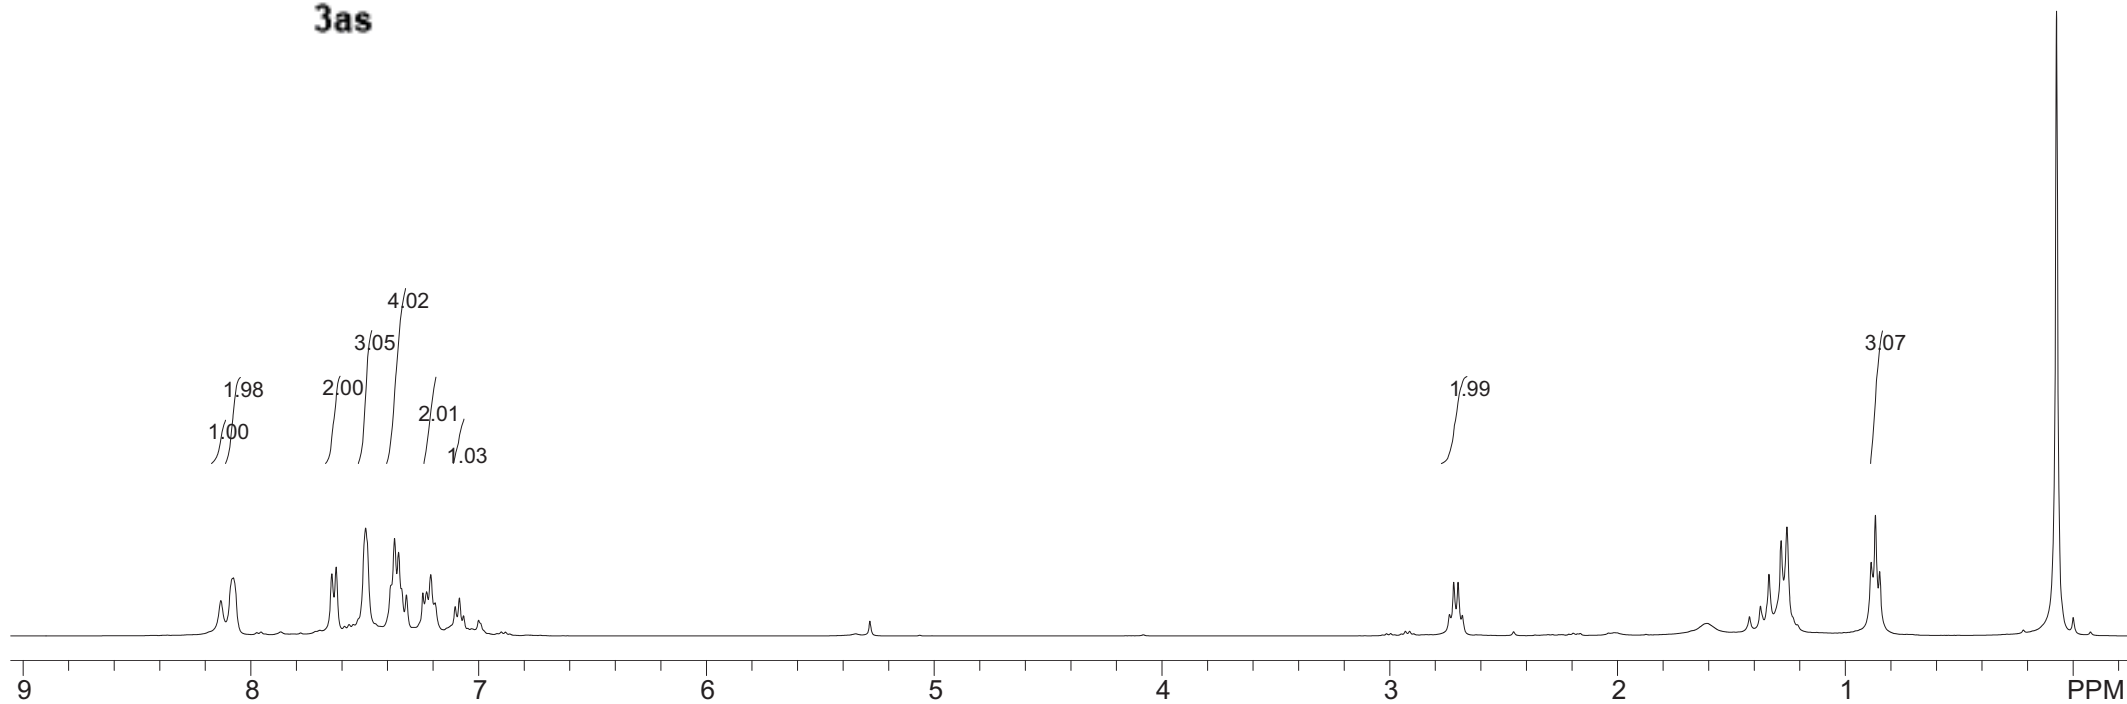

174.050

138.380  
135.427  
132.372  
130.213  
128.792  
128.485  
127.712  
126.495  
126.364  
125.758  
122.944  
122.900  
122.864  
119.765  
118.780  
110.964

77.314  
77.000  
76.679

24.516

11.778

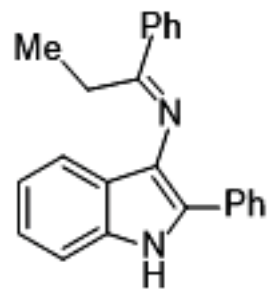

3as

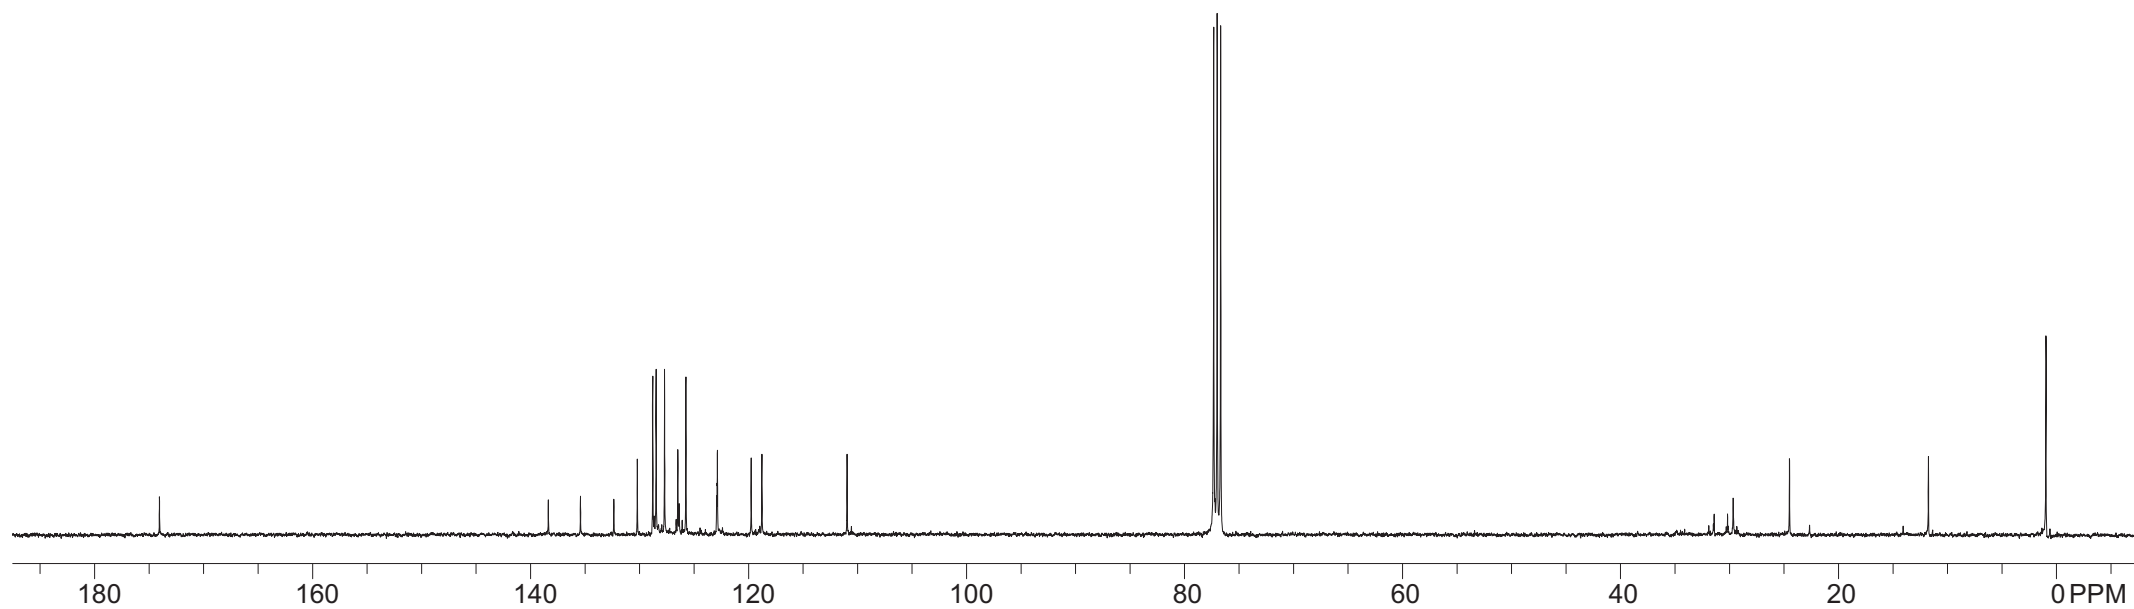



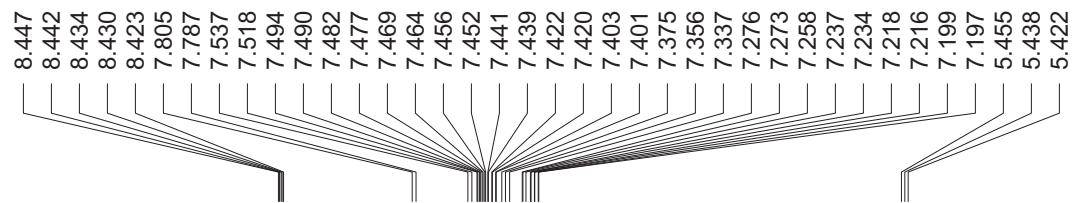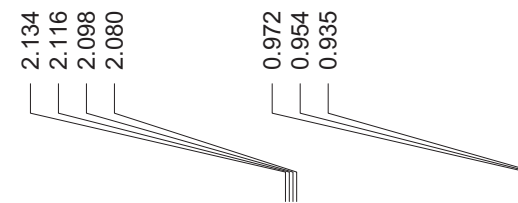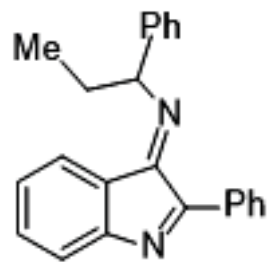

**4as**

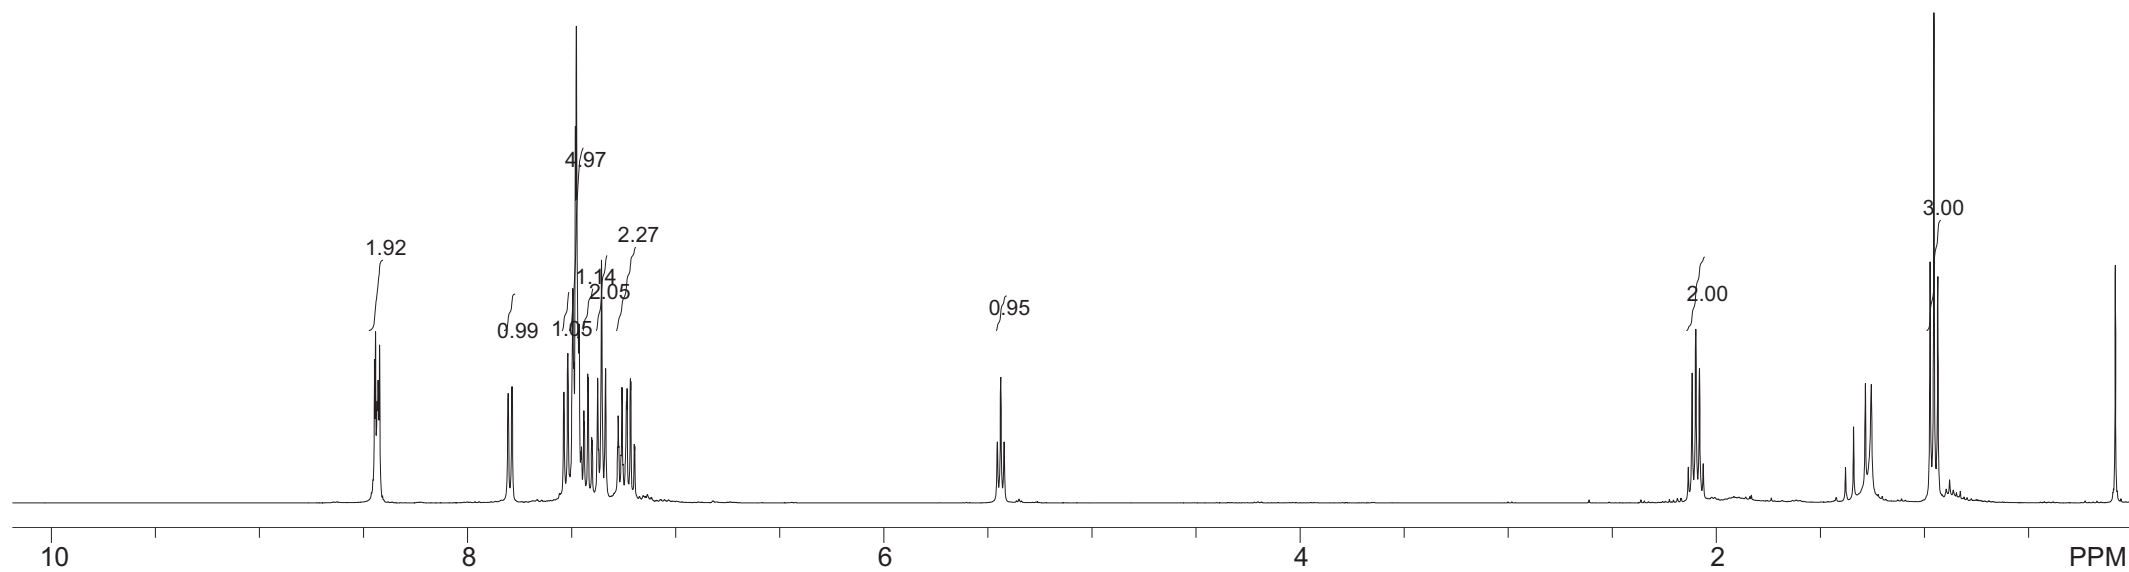

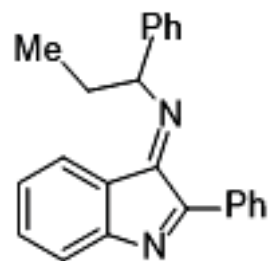

4as

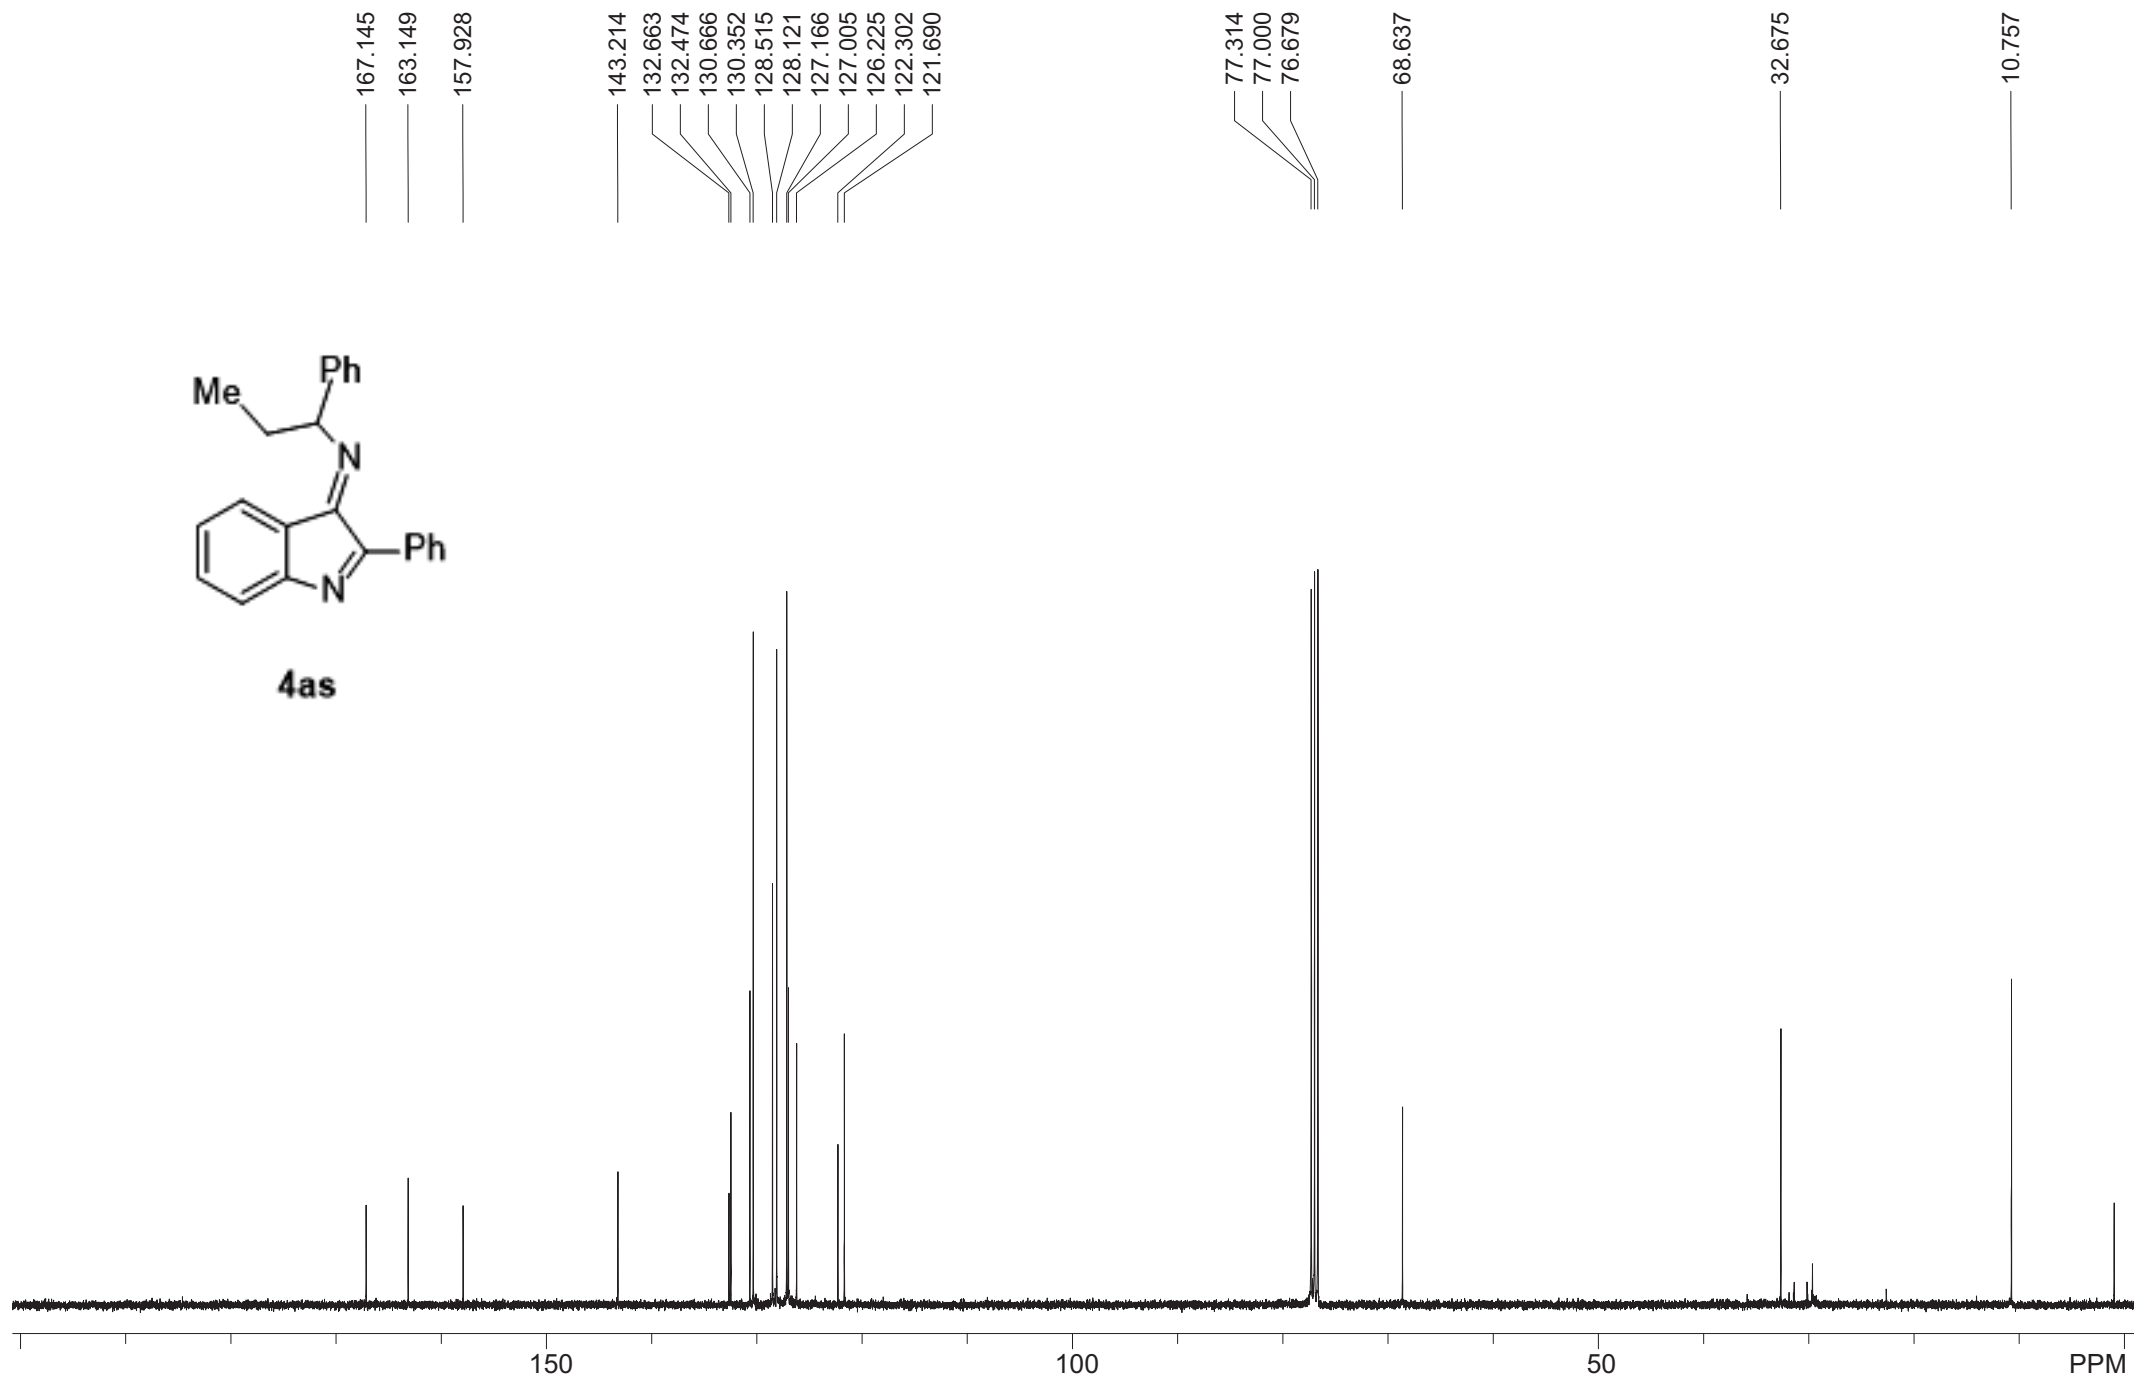

8.444  
8.428  
7.500  
7.484  
7.473  
7.453  
7.434  
7.378  
7.359  
7.341  
7.285  
7.267  
7.254  
7.015  
6.996  
6.921  
6.902  
6.883  
6.566  
6.547

0.000

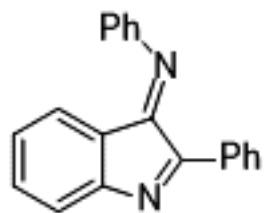

**4at**

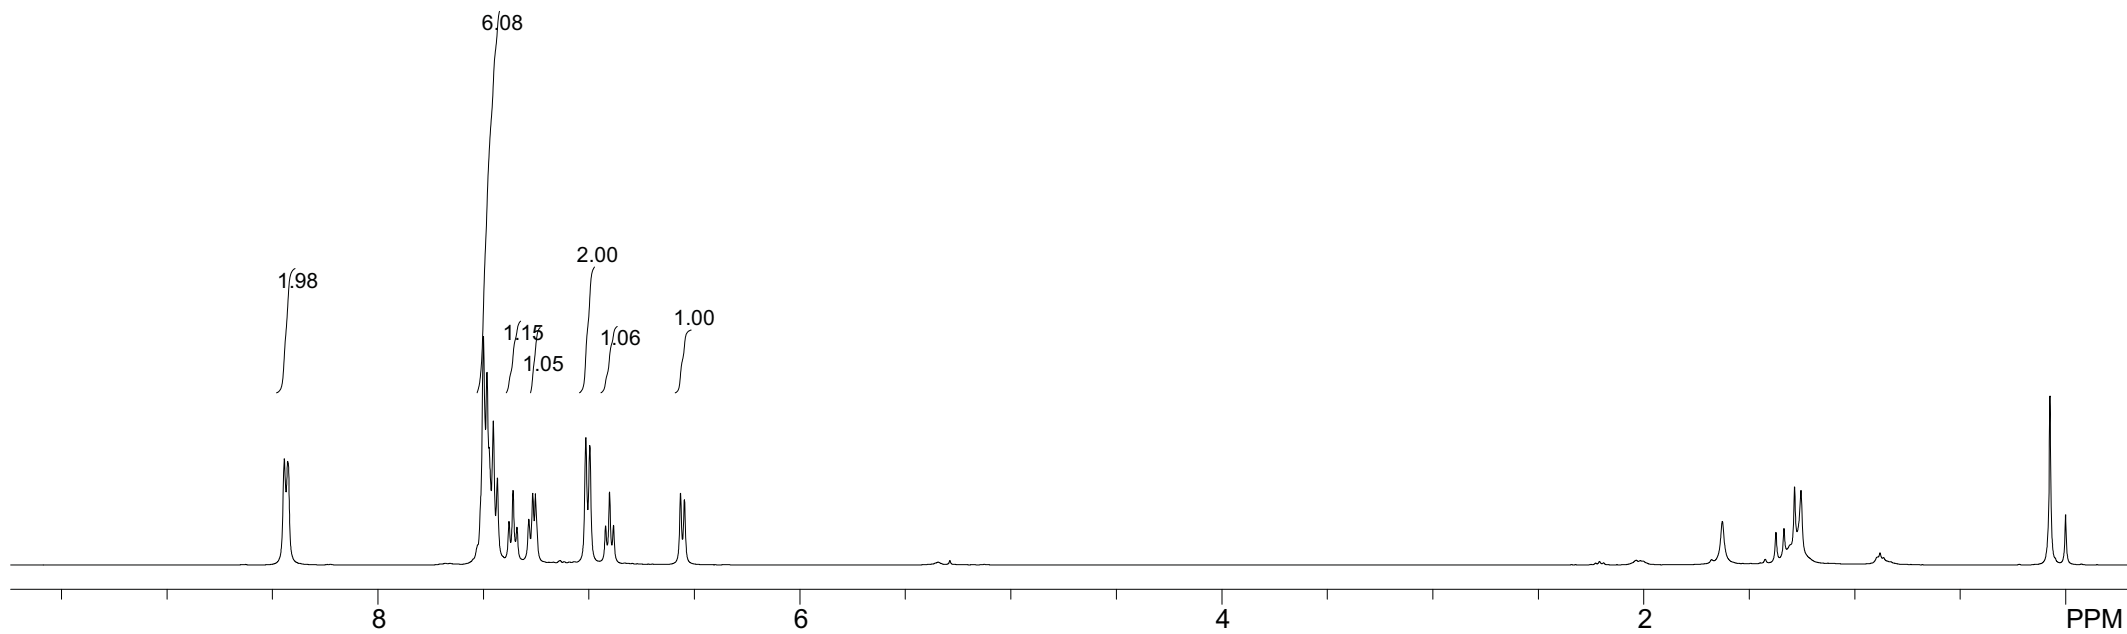

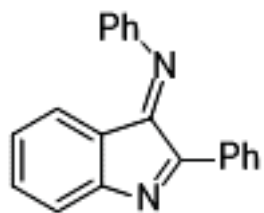

4at

166.511  
164.228  
157.870  
150.353

133.239  
132.109  
131.067  
130.068  
129.390  
128.391  
126.859  
125.809  
125.233  
121.661  
121.507  
117.570

77.314  
77.000  
76.679

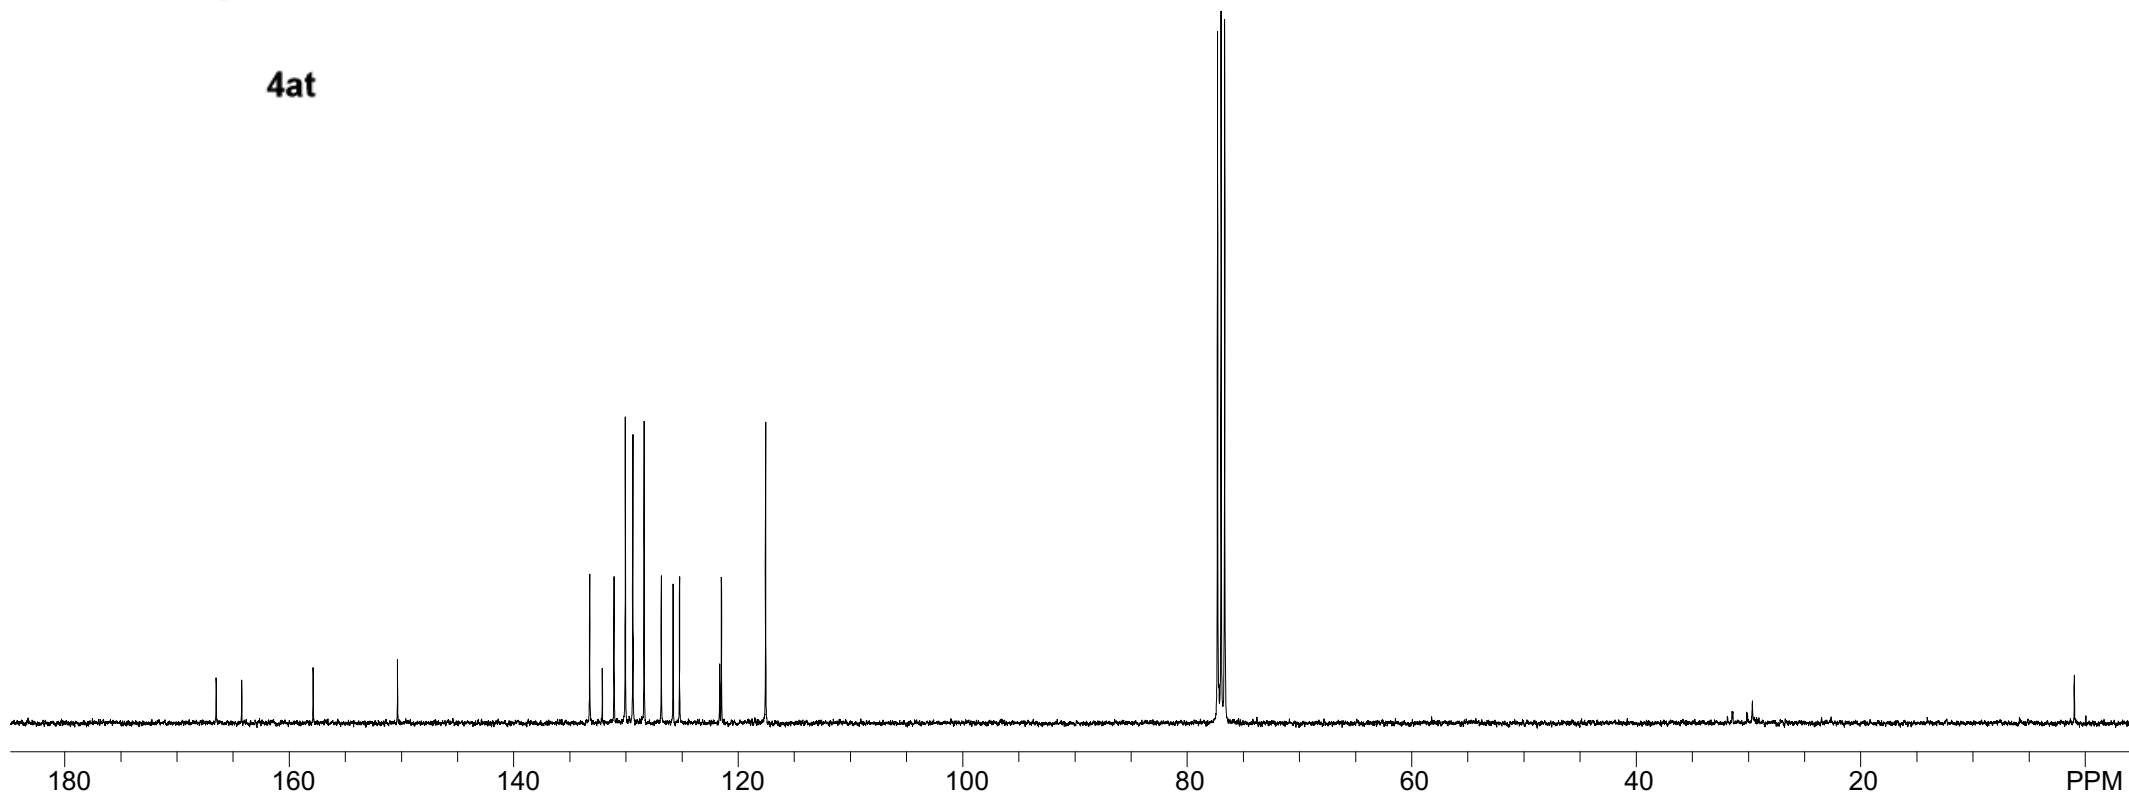

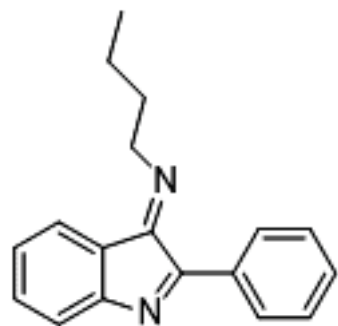

4au

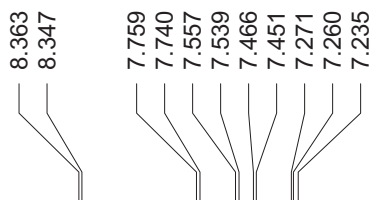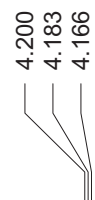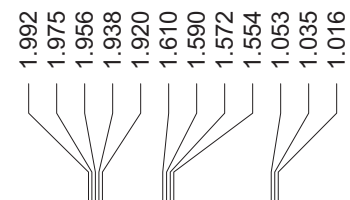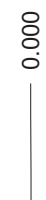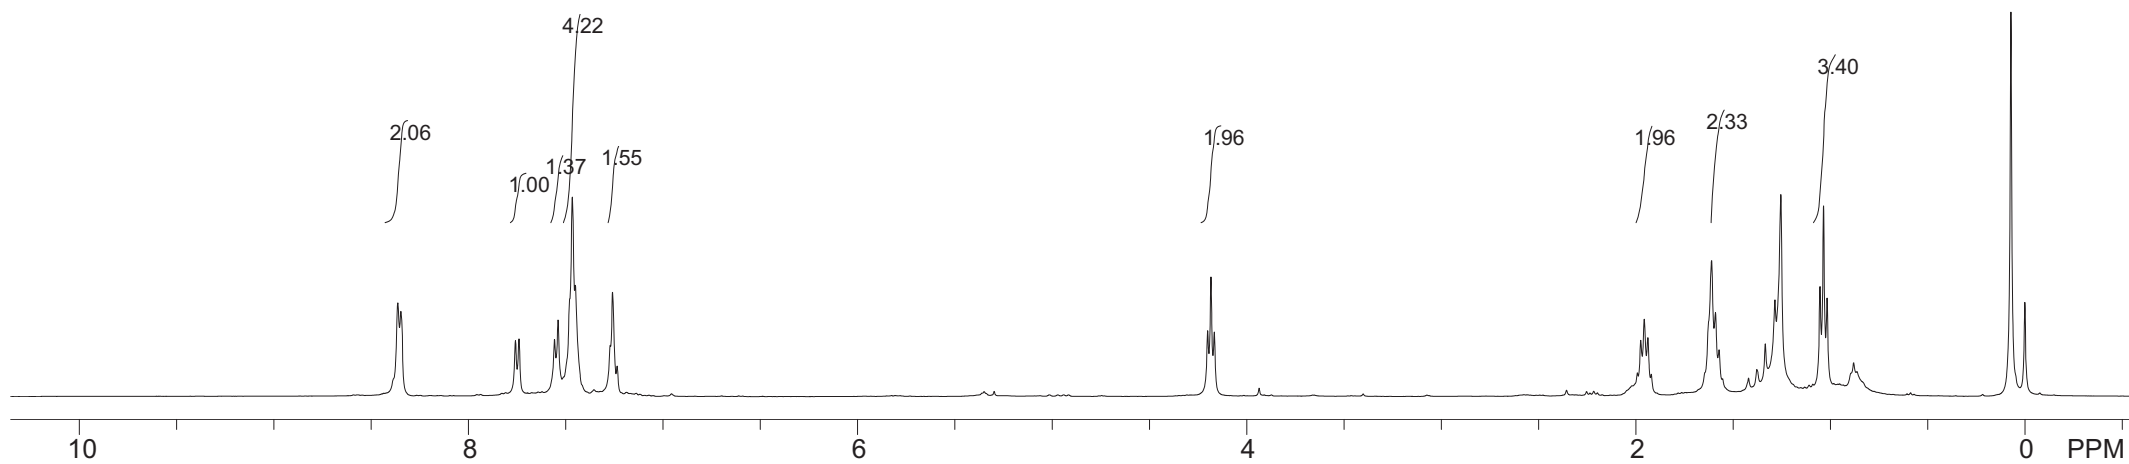

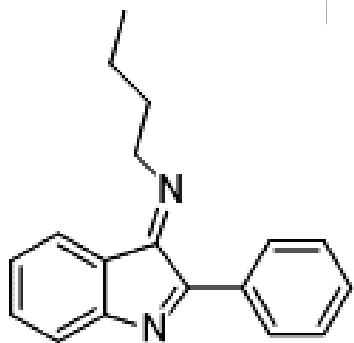

4au

164.484

157.498

132.532

132.408

130.695

130.228

128.186

127.012

126.364

122.463

121.558

54.571

33.091

20.892

13.958

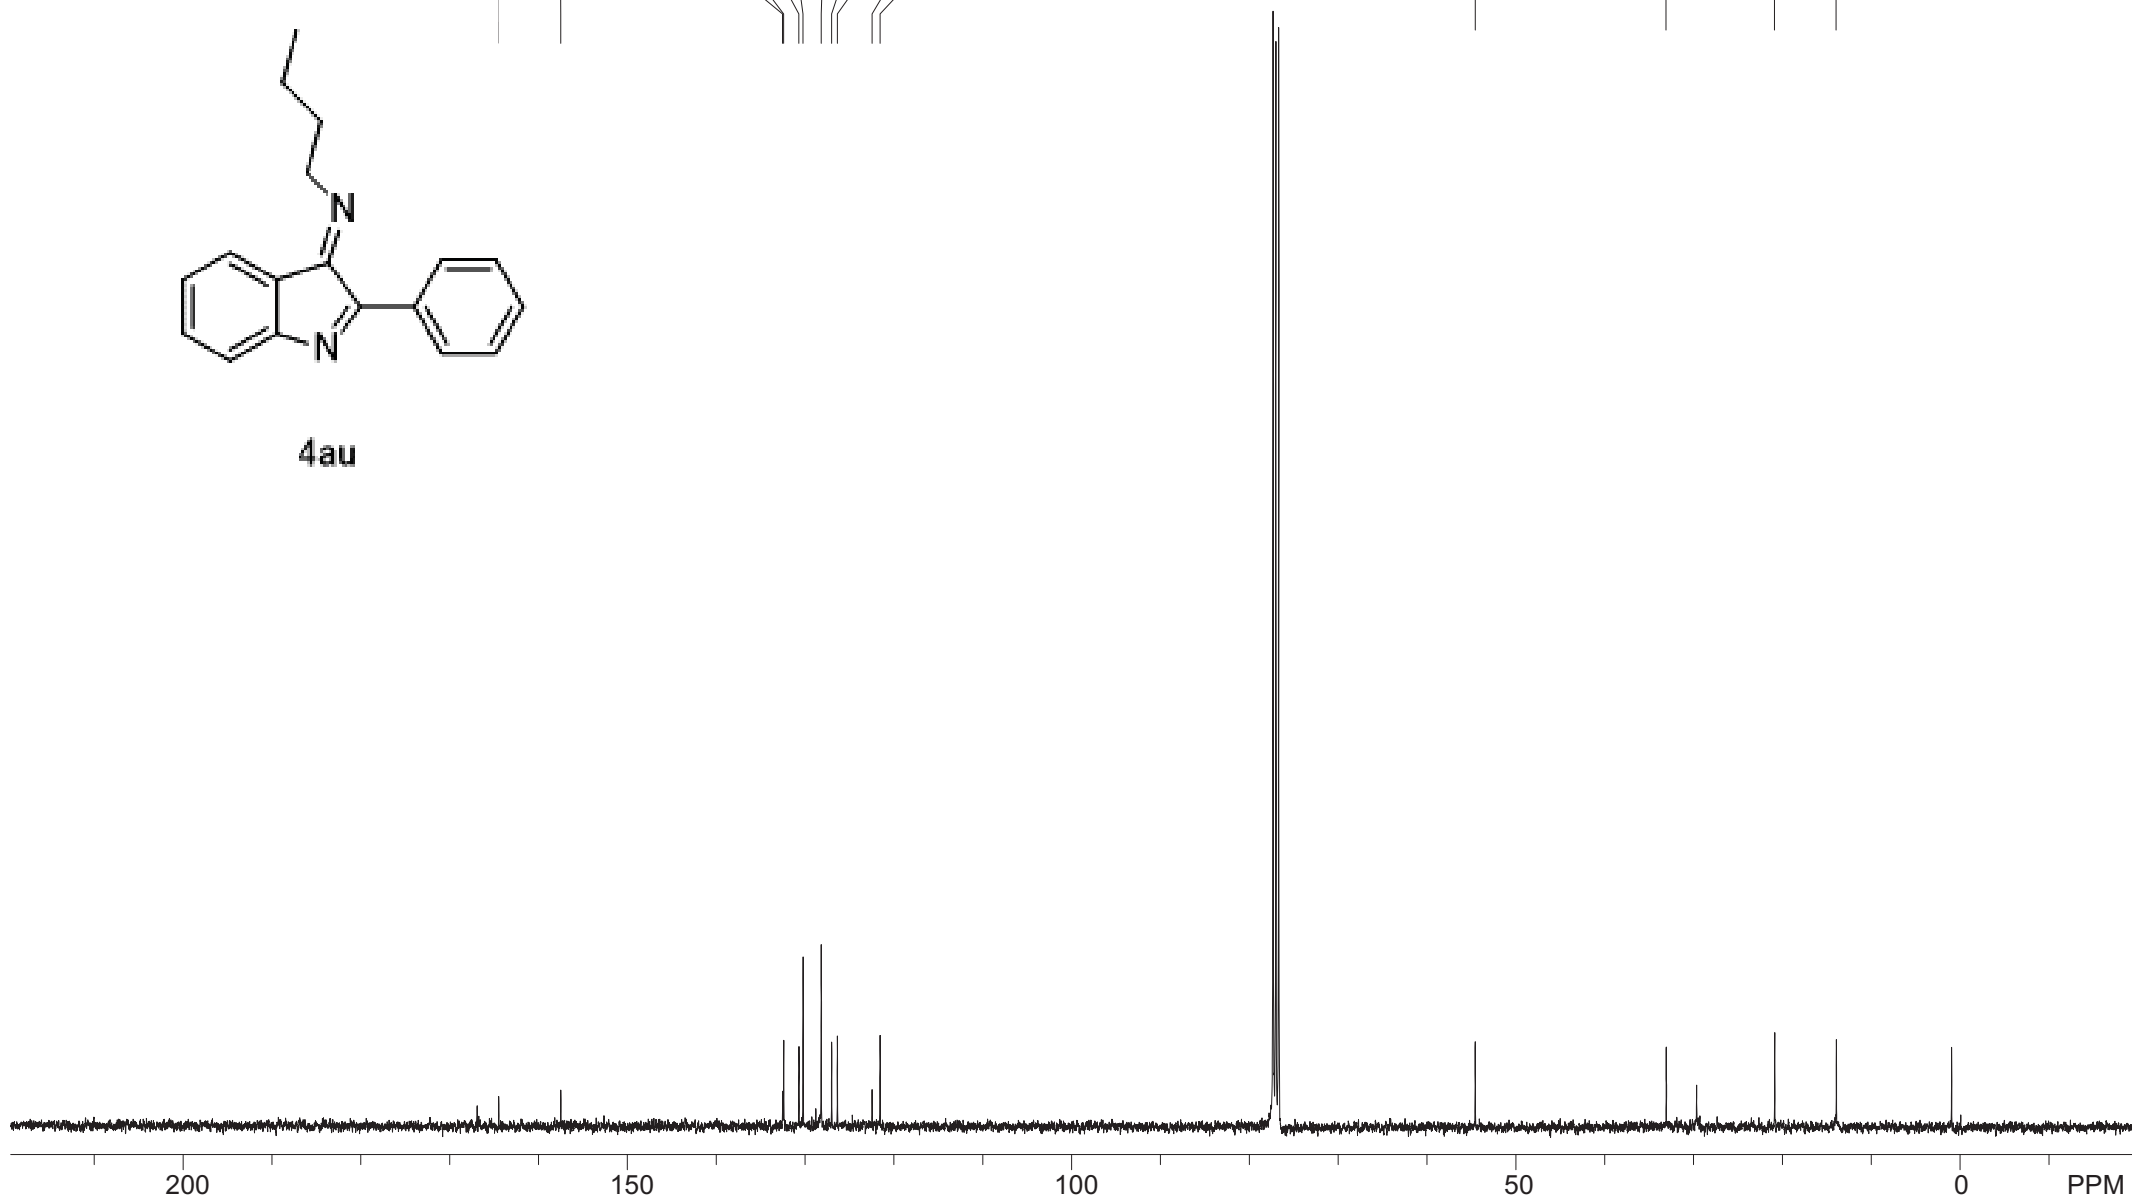

14.278

8.690  
8.674  
8.558  
8.541  
8.001  
7.973  
7.956  
7.932  
7.912  
7.893  
7.774  
7.757  
7.738

2.500

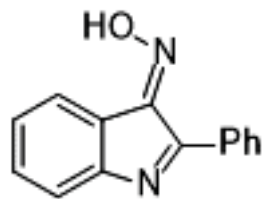

5a

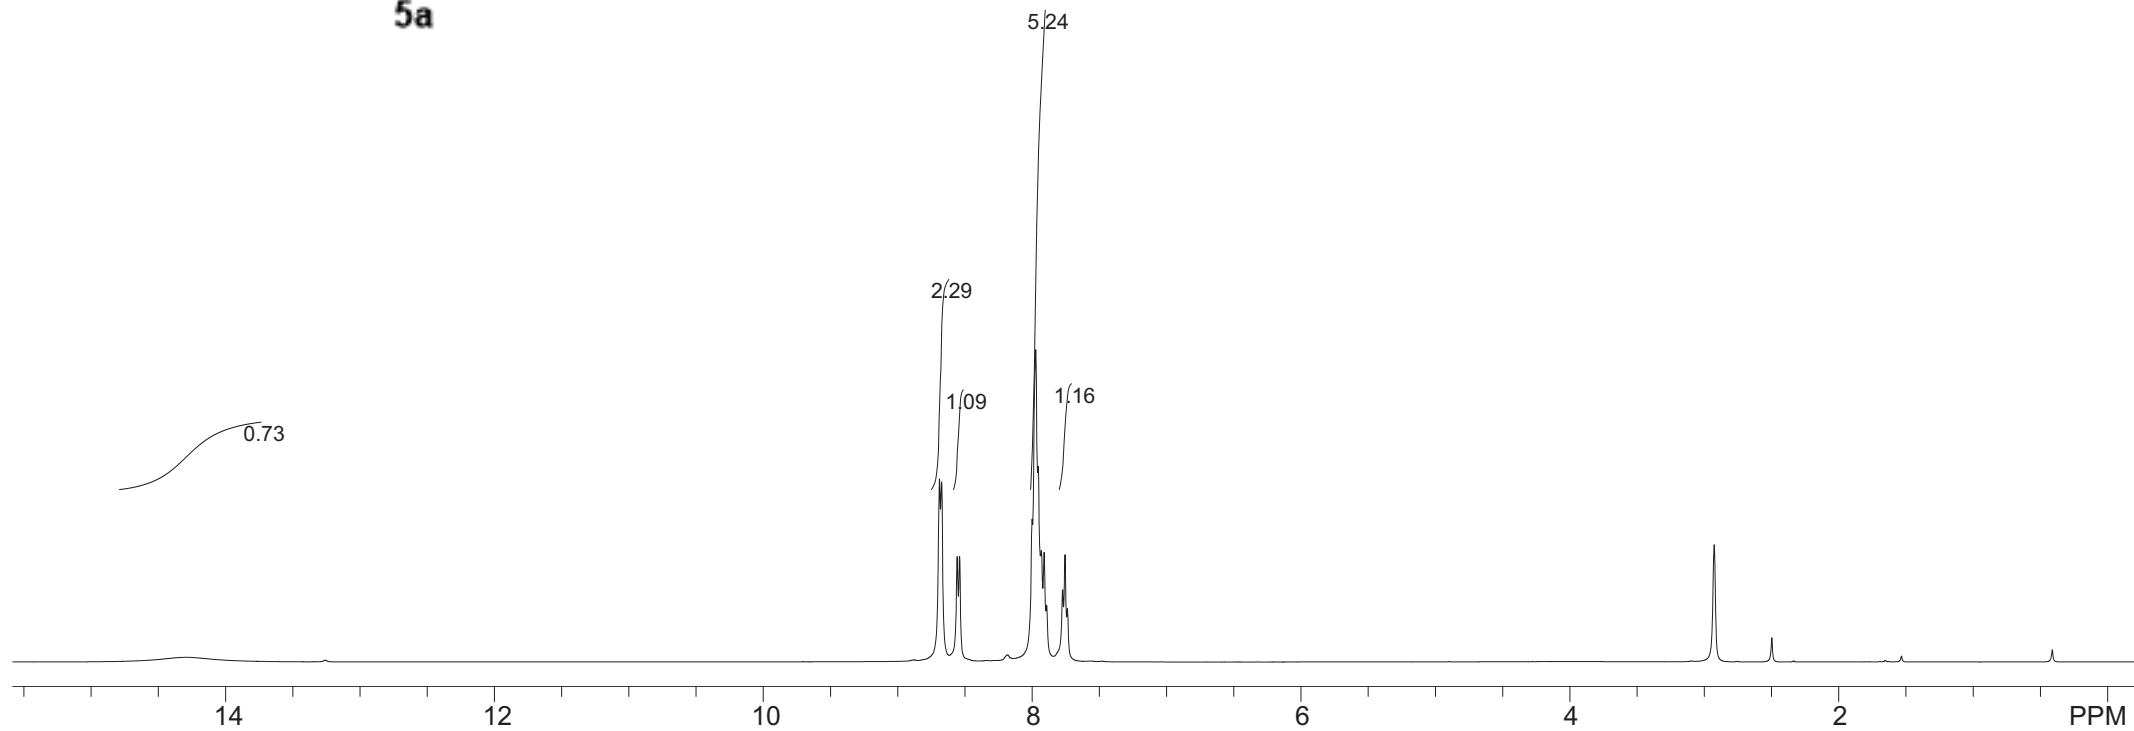

154.588  
154.530

132.407  
131.605  
131.277  
130.380  
130.264  
129.826  
128.878  
128.572  
127.617

40.527  
40.316  
40.104  
39.900  
39.689  
39.477  
39.273

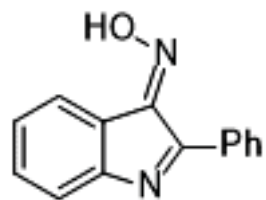

5a

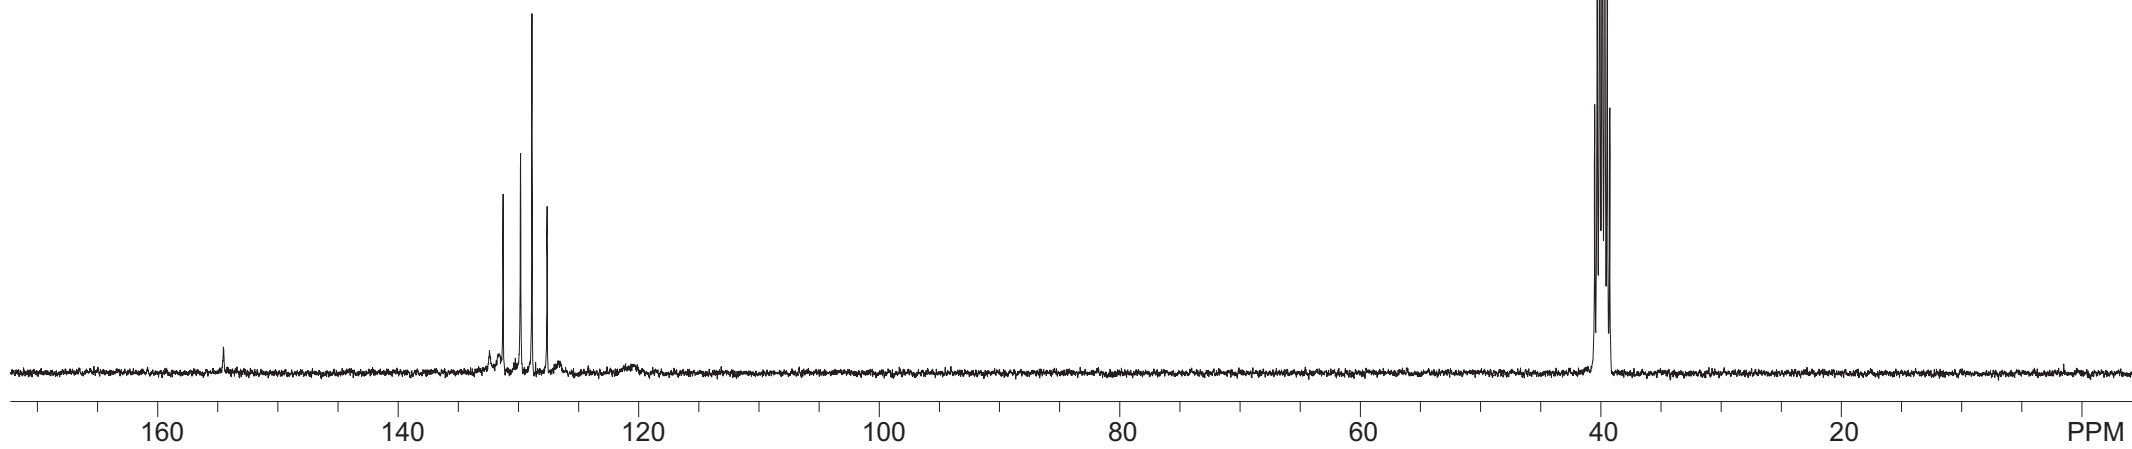



10.492

7.816  
7.796  
7.686  
7.666  
7.456  
7.437  
7.418  
7.265  
7.245  
7.210  
7.192  
7.173  
7.076  
7.058  
7.039  
6.930  
6.912  
6.894

4.487

3.397

2.500

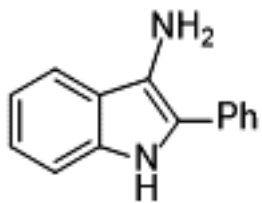

6

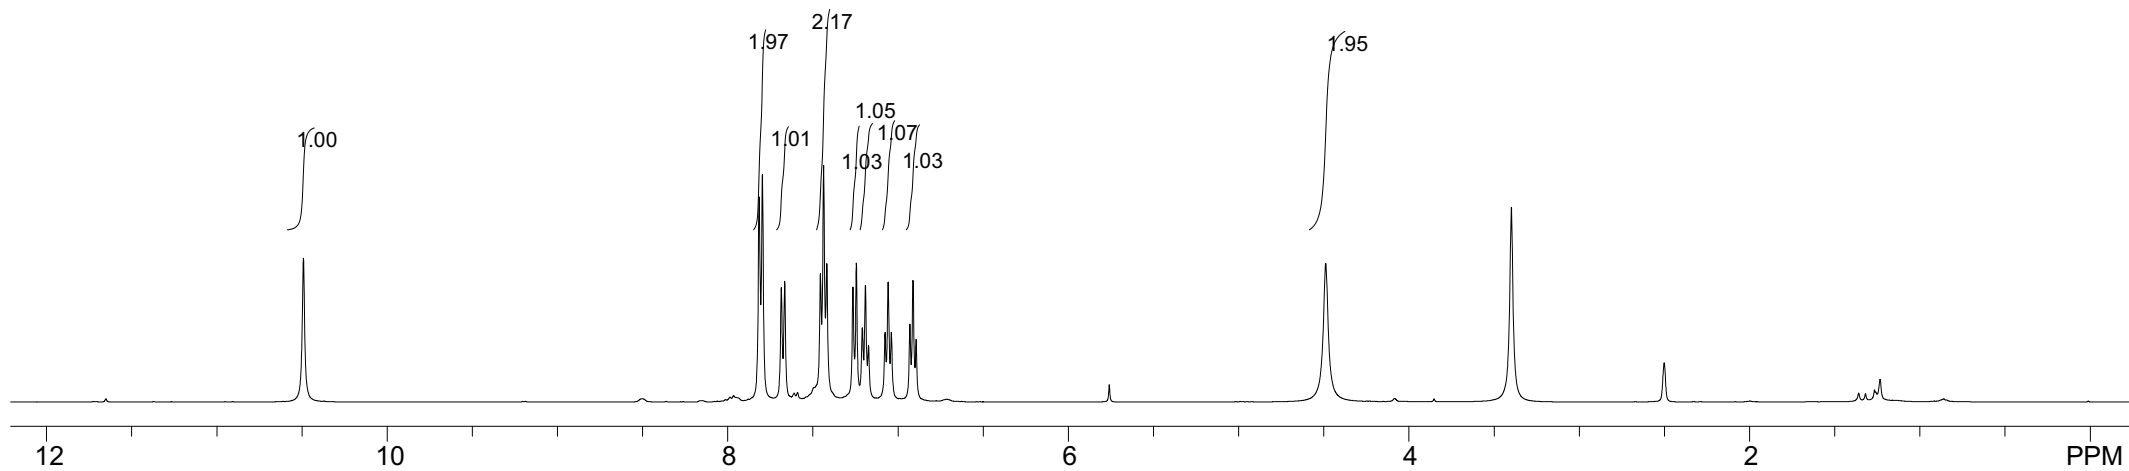

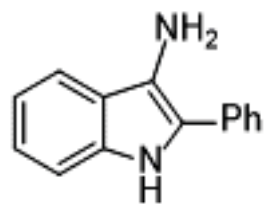

6

134.938  
133.568  
128.653  
125.037  
124.978  
122.915  
122.886  
121.916  
118.824  
118.255  
117.315  
110.789

40.127  
39.916  
39.704  
39.500  
39.289  
39.077  
38.873

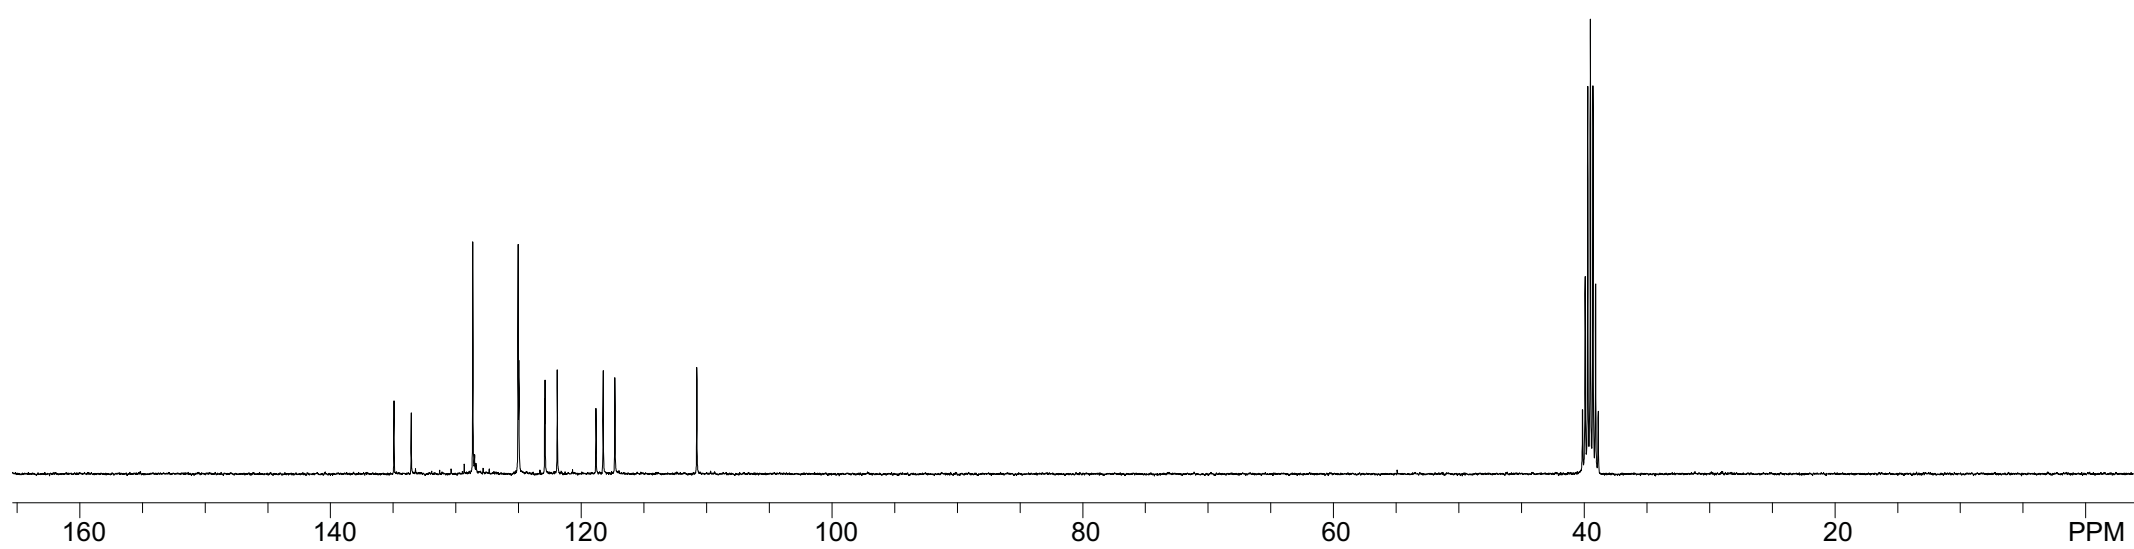

7.769  
7.622  
7.603  
7.583  
7.564  
7.417  
7.398  
7.379  
7.336  
7.319  
7.299  
7.289  
7.283  
7.265  
7.251  
7.233  
7.218  
7.201  
7.183  
7.163  
7.111  
7.092  
7.073

4.305

2.993

0.000

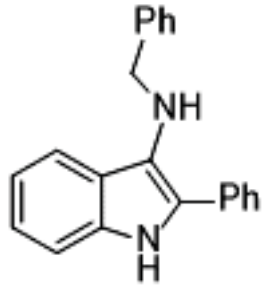

7

8.02

2.11

2.15

1.00

1.10

1.12

2.13

1.13

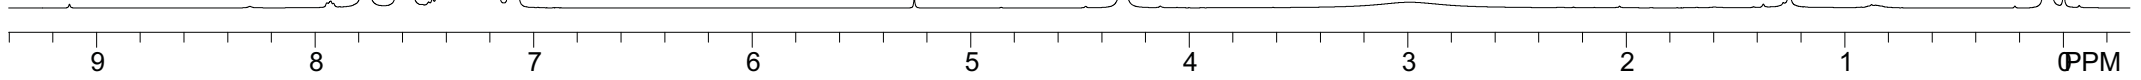

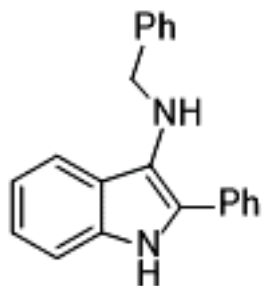

7

140.239  
134.909  
132.525  
128.952  
128.412  
128.033  
127.129  
127.056  
126.677  
125.780  
124.672  
123.534  
122.557  
119.320  
118.379  
111.102

77.314  
77.000  
76.679

53.988

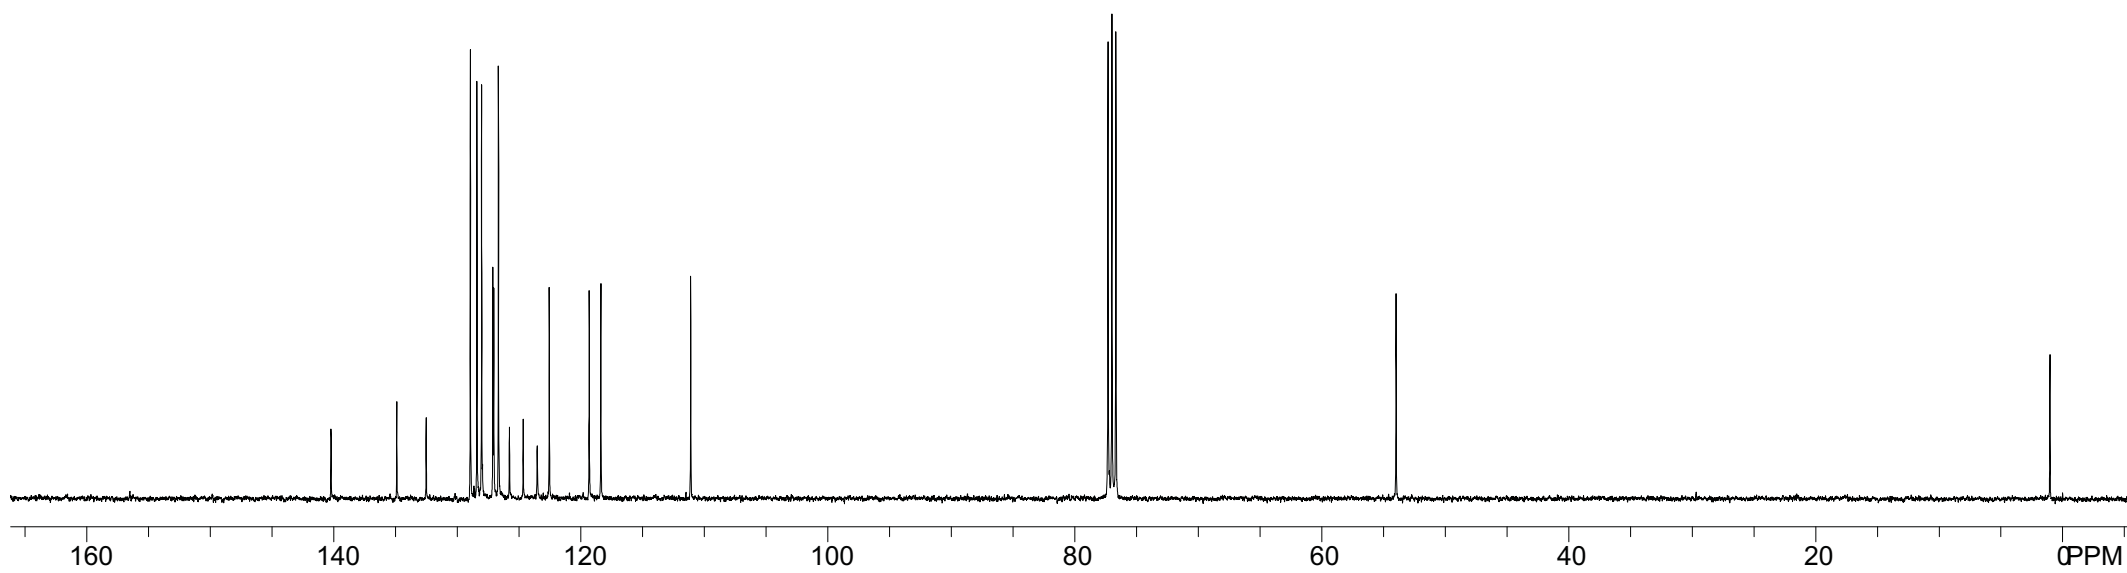

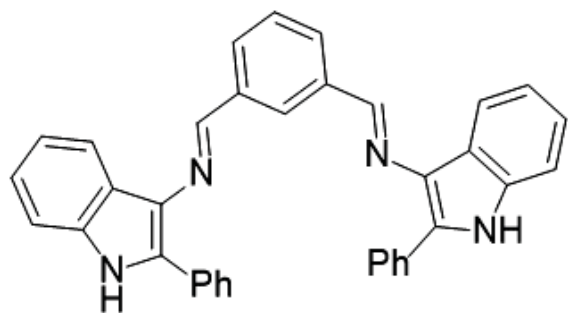

**8**

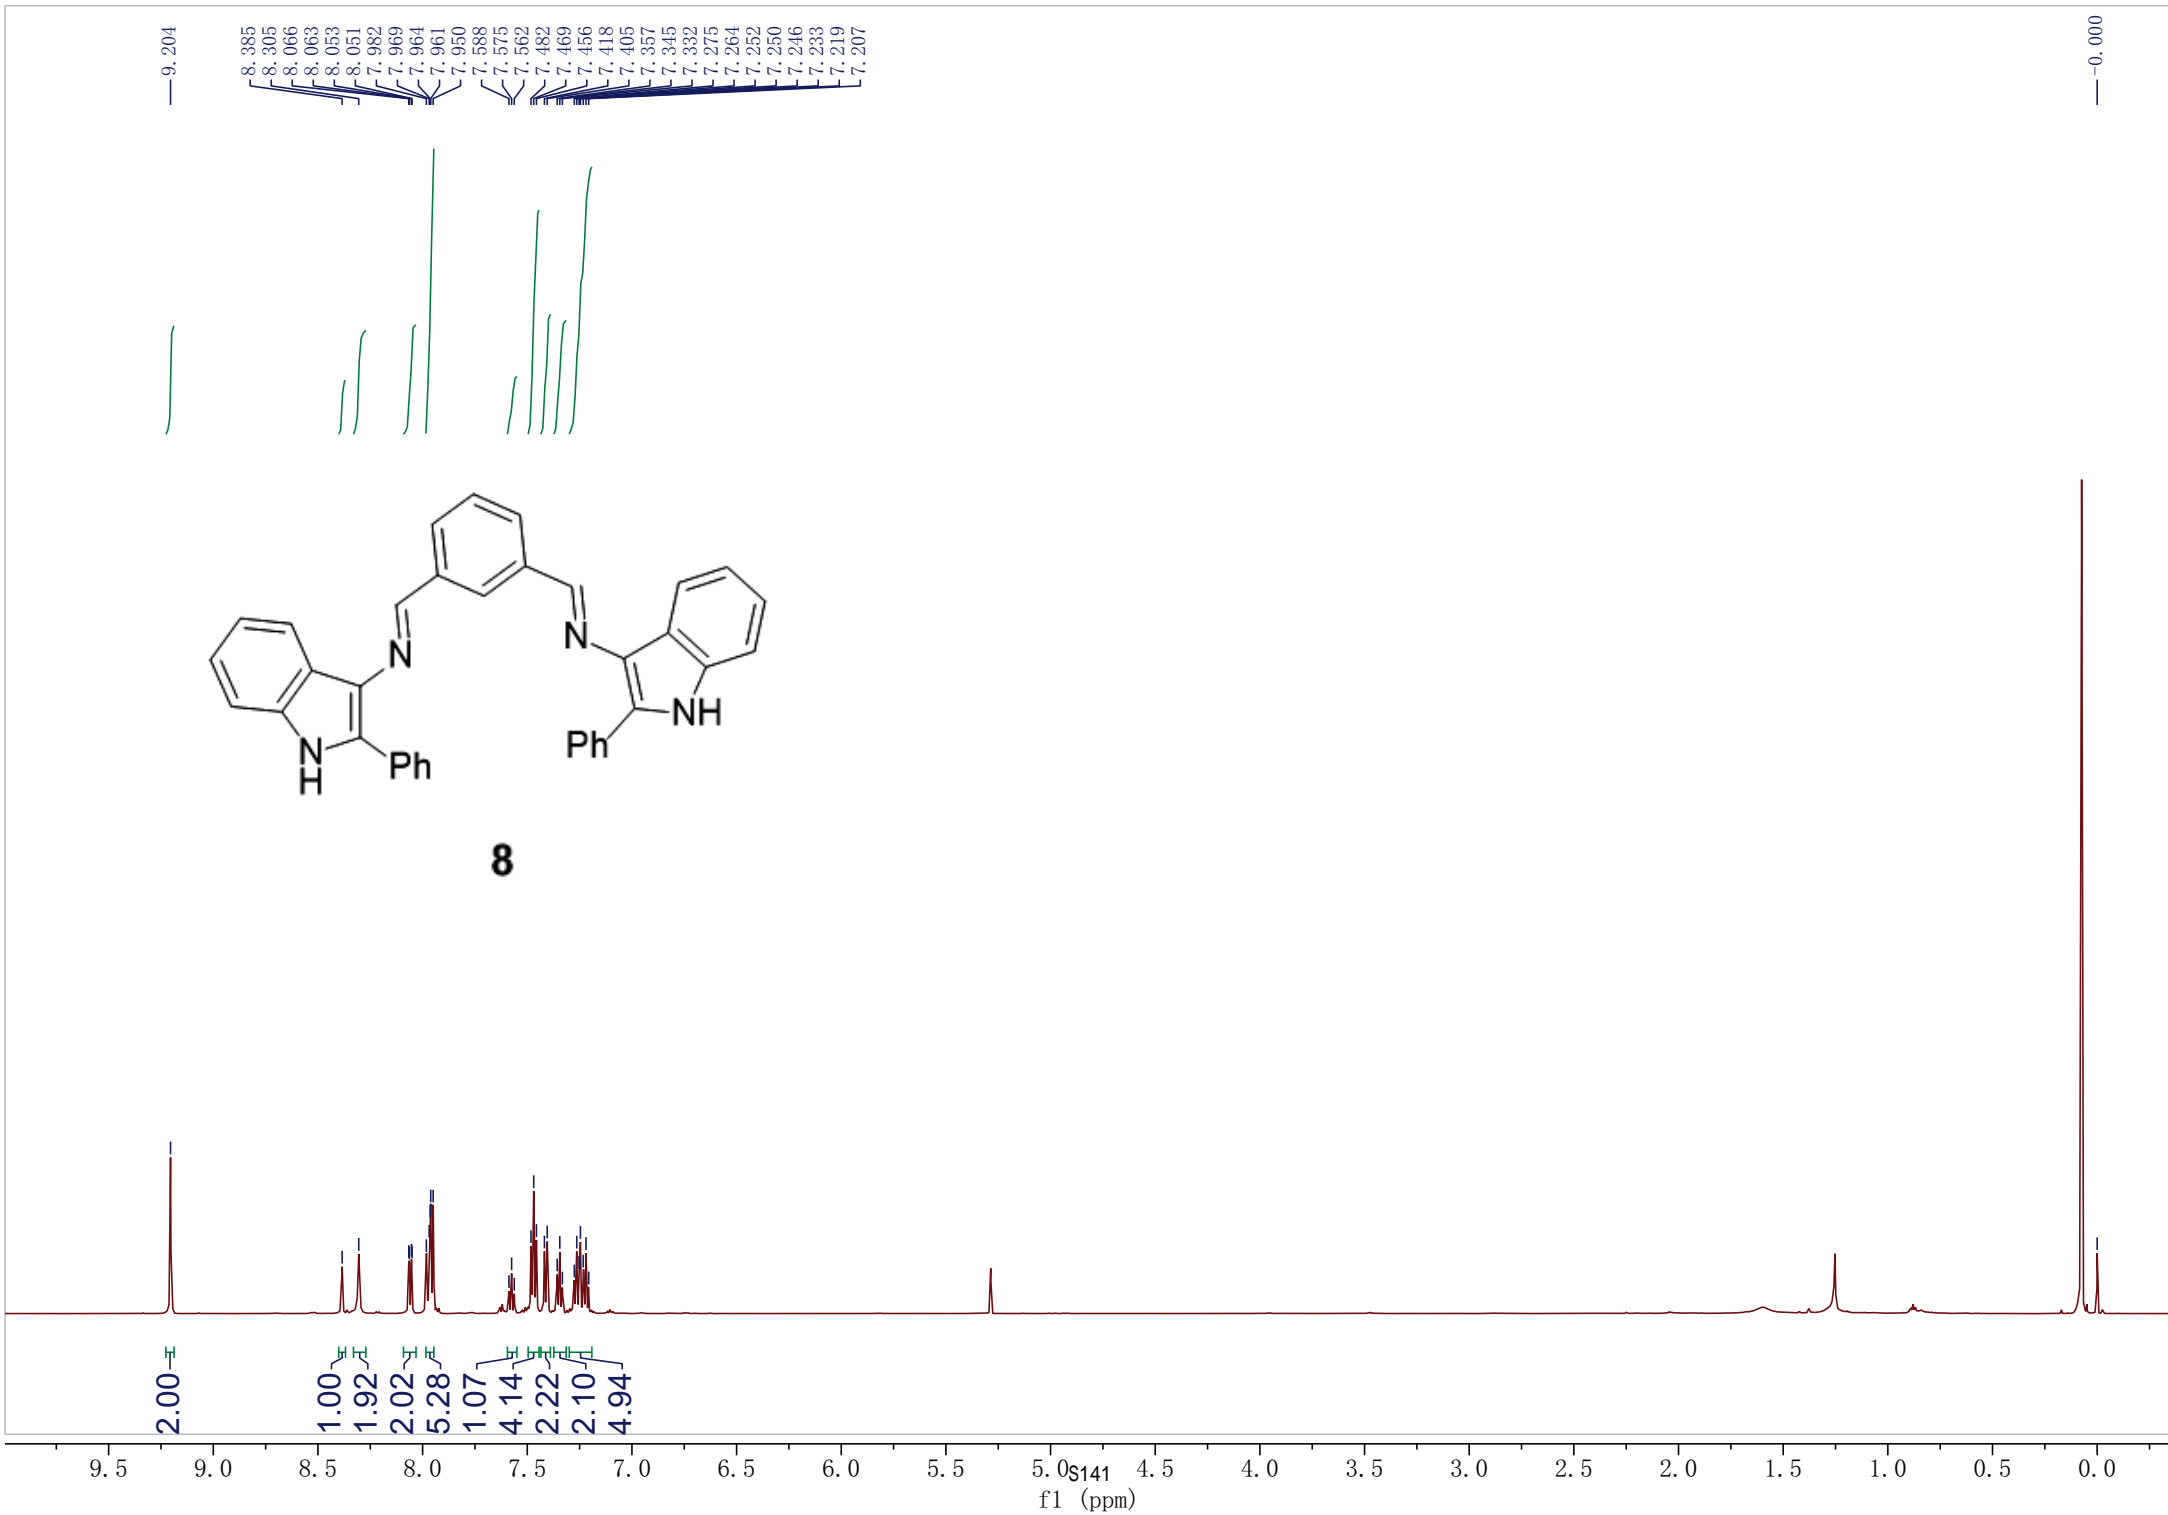

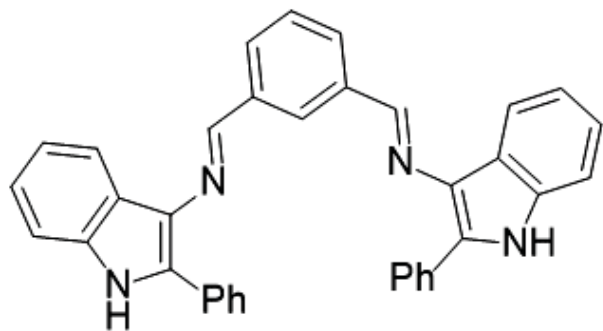

**8**

156.01  
138.27  
135.46  
132.25  
131.69  
129.09  
128.67  
128.29  
128.03  
127.72  
125.82  
123.13  
122.00  
121.06  
119.90  
111.51

77.21  
77.00  
76.79

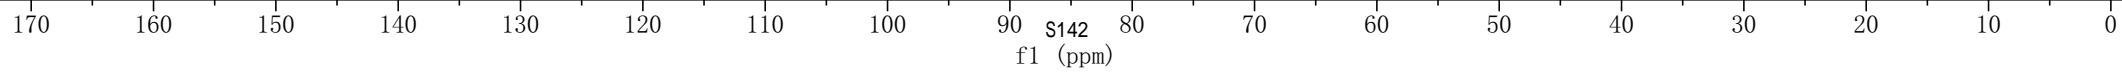

Supplement: d1gc02849a1.pdf [file d1gc02849a1.pdf]
